# Supplementary material for: N-2,2,2-Trifluoroethylisatin ketimine as a 1,2-dipolarophile for [3 + 2]-addition to access optically pure spirothiazolidine oxindoles
Source: Royal Society of Chemistry journal article supplement (doi:10.1039/d3ob00685a), 2023-01-01
Supplement: d3ob00685a1.pdf [file d3ob00685a1.pdf]

## Supporting Information

### N-2,2,2-trifluoroethylisatinketimine as a 1,2-dipolarophile for [3+2]- addition to access optically pure spirothiazolidine oxindoles

Madavi S. Prasad,<sup>\*a</sup> Sankar Bharani,<sup>a</sup> Murugesan Sivaprakash,<sup>a</sup> Prabha Vadivelu,<sup>a</sup> Durairajan Siva Sundara Kumar,<sup>b</sup> and L. Raju Chowhan<sup>\*c</sup>

<sup>a</sup>*Asymmetric Synthesis and Catalysis Laboratory, Department of Chemistry, Central University of Tamil Nadu, Thiruvarur, 610 005, India*

[shivaprasad@cutn.ac.in](mailto:shivaprasad@cutn.ac.in) and [shivacutn@gmail.com](mailto:shivacutn@gmail.com)

<sup>b</sup>*Department of Microbiology, School of Life Sciences, Central University of Tamil Nadu (CUTN), Tiruvarur-610 005, India.*

<sup>c</sup>*School of Physical Sciences, Jawaharlal Nehru University, New Delhi-110067, India*

#### Table of Contents

---

|                                              |         |
|----------------------------------------------|---------|
| 1) General experimental procedures           | S2-S3   |
| 2) Characterization data for products        | S4-S13  |
| 3) Single Crystal X-ray data for compound 4a | S14-S15 |
| 4) NMR spectral data for products 4a- 4f'    | S16-S87 |
| 5) HPLC data of compound 4a – 5a             | S88-110 |

## EXPERIMENTAL SECTION

### 1.1 General Experimental Procedures

*Nuclear Magnetic Resonance Spectroscopy:*  $^1\text{H}$  NMR spectra were acquired on Bruker AVIII400 (400 MHz) spectrometer and were referenced to TMS and residual non-deuterated solvent peak in  $\text{CDCl}_3$  ( $\delta = 7.26$ ). Chemical shifts ( $\delta\text{H}$  and  $\delta\text{C}$ ) are reported in parts per million (ppm), with signal splitting recorded as singlet (s), doublet (d), triplet (t), quartet (q), and multiplet and unresolved peaks (m). Coupling constants ( $J$ ) are mentioned in Hz and are presented as observed.  $^{13}\text{C}$  NMR spectra were obtained on Bruker AVIII400 (100 MHz) spectrometers and were referenced to solvent peaks in  $\text{CDCl}_3$  ( $\delta = 77.0$ ).

*Mass Spectrometry:* High-resolution mass spectra (HRMS) were recorded by the Thermo Fisher spectrometer using electrospray ionization (ESI<sup>+</sup>). The parent ion  $[\text{M}+\text{H}]^+$ ,  $[\text{M}+\text{Na}]^+$  is calculated to 4 decimal places from the molecular formula, and all values are within a tolerance of 5 ppm.

*Specific rotations:* Optical rotations were recorded on an Anton Parr MCP100 polarimeter with a path length of 1 dm (using the sodium D line, 589 nm). Specific rotations ( $[\alpha]_D^{25}$ ) are reported in units of  $10^{-1}$  deg  $\text{cm}^2 \text{g}^{-1}$ . Concentrations are reported in g/mL. Temperatures are reported in  $^\circ\text{C}$  (typically  $25^\circ\text{C}$ ).

*Infrared Spectroscopy:* Absorption spectra were obtained on a Shimadzu FT-IR spectrometer. Wavelengths of maximum absorbance ( $\nu_{\text{max}}$ ) are quoted in wavenumbers ( $\text{cm}^{-1}$ ). Only selected characteristic IR absorption data are provided for each compound.

*Single Crystal XRD:* Data was collected from the Sophisticated Analytical Instrumental Facility, Indian Institute of Technology Madras- Chennai.

#### Materials:

Unless otherwise stated, all reactions were carried out in oven-dried glassware, using anhydrous reaction solvents. All other commercially available reagents and solvents were either used as received and/or dried and purified before use using standard procedures.

**General Procedure A:** *Preparation of isatin-derived ketimines:*

**1a-g** was prepared by following the reported literature procedure.<sup>1</sup>

**General Procedure B:** *Preparation of racemic molecules 4a – 4w:*

To an oven-dried vial containing catalyst DABCO **3** (0.05 equiv.), the 1,4-dithaine-2,5-diol **2** (0.7 equiv.) was added followed by the addition of Ketimine **1** (1.0 equiv.) in EtOH (1M) and toluene (0.12 M). The resulting mixture was stirred at RT for 6 hours; the crude product was directly purified by preparative TLC.

**General Procedure C:** *Preparation of chiral molecules 4a – 4w:*

To an oven dried vial containing catalyst **3e** (0.025 equiv.), the 1,4-dithaine-2,5-diol **2** (0.7 equiv.) was added followed by the addition of Ketimine **1** (1.0 equiv.) in CHCl<sub>3</sub> (0.1 M). The resulting mixture was stirred at RT for 19-24 hours; the crude reaction mixture was directly loaded into the column and purified by flash column chromatography using hexane/ EtOAc (10:1) to avoid racemization.

**General Procedure D:** *Preparation of compound 5a:*

Compound **5a** was prepared by following the reported literature procedure.<sup>2</sup>

**General Procedure E:** *Preparation of compound 6a:*

To an oven-dried vial containing **4a** (1 equiv.), MCPBA (5 equiv.) was added in DCM (0.06 M). The resulting mixture was stirred at RT for 24 hours; The reaction mixture was diluted with 15 mL of EtOAc, washed with 10% Na<sub>2</sub>SO<sub>4</sub> solution (2×10mL), saturated NaHCO<sub>3</sub> solution (2×10 mL), dried over Na<sub>2</sub>SO<sub>4</sub> and concentrated in vacuo. Then the crude product was directly purified by column chromatography using hexane/ EtOAc (3:1) as a mobile phase.

**References:**

- 1) Wang, X, Huang, D, Wang, K-H, et al. Tin powder promoted synthesis of trifluoroethylamine-containing 3,3'-disubstituted oxindoles. *Appl Organometal Chem.* 2019, **33**, 4995.
- 2) P. Cheng, W. Guo, P. Chen, Y. Liu, X. Du and C. Li, *Chem. Commun.* 2016, **52**, 3418.

**(3R,4'R)-4'-hydroxy-1-methyl-3'-(2,2,2-trifluoroethyl)spiro[indoline-3,2'-thiazolidin]-2-one (4a):**

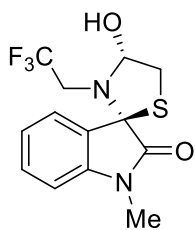

Prepared by following general procedure **C** purified by column chromatography using hexane and isolated product **4a** in 92% yield as a white solid with M. P. 205 - 208 °C; The enantiomeric excess (*ee*) was determined by chiral stationary phase HPLC using a Phenomenex cellulose-5 column (hexane/EtOAc = 80:20, flow rate 0.5 mL/min,  $\lambda = 254$  nm),  $t_R = 10.645$  min (minor),  $t_R = 12.583$  min (major),  $[\alpha]_D^{25} = -59.834$  (CHCl<sub>3</sub>, *c* = 0.72 g/100mL, CHCl<sub>3</sub> for 95% *ee*); IR (neat)  $\nu_{max}$  1716, 1612, 1269, 1130, 1103, and 759 cm<sup>-1</sup>; <sup>1</sup>H NMR (400 MHz, CDCl<sub>3</sub>)  $\delta$  7.49 (1H, d, *J* = 7.5 Hz), 7.37 (1H, t, *J* = 7.8 Hz), 7.18 (1H, t, *J* = 7.6 Hz), 6.85 (1H, d, *J* = 7.8 Hz), 5.59 (1H, d, *J* = 11.9 Hz), 5.46 (1H, dd, *J* = 4.6, 11.9 Hz), 3.79 – 3.69 (2H, m), 3.36 (1H, d, *J* = 10.5 Hz), 3.23 (3H, s), 2.46 – 2.36 (1H, m); <sup>13</sup>C NMR (100 MHz, CDCl<sub>3</sub>, DEPT-135)  $\delta$  177.9 (C, N-C=O), 143.1 (C), 130.8 (CH), 126.4 (CH), 126.3 (C), 124.4 (CH), 124.4 (CF<sub>3</sub>, q, *J* = 277 Hz), 108.9 (CH), 88.1 (CH), 77.1 (C), 44.5 (CH<sub>2</sub>, q, *J* = 33 Hz), 40.3 (CH<sub>2</sub>), 26.9 (CH<sub>3</sub>); <sup>19</sup>F NMR (376MHz, CDCl<sub>3</sub>)  $\delta$  -70.91; HRMS (ESI) *m/z*: 341.05420 [M + Na]<sup>+</sup>, calcd for C<sub>13</sub>H<sub>13</sub>O<sub>2</sub>N<sub>2</sub>F<sub>3</sub>NaS; Found 341.05293.

**(3R,4'R)-5-fluoro-4'-hydroxy-1-methyl-3'-(2,2,2-trifluoroethyl)spiro[indoline-3,2'-thiazolidin]-2-one (4b):**

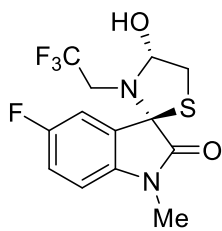

Prepared by following general procedure **C** purified by column chromatography using hexane and isolated product **4b** in 84% yield as a colourless semi solid. The enantiomeric excess (*ee*) was determined by chiral stationary phase HPLC using a Phenomenex cellulose-5 column (hexane/EtOAc = 85:15, flow rate 0.5 mL/min,  $\lambda = 254$  nm),  $t_R = 12.711$  min (minor),  $t_R = 15.332$  min (major),  $[\alpha]_D^{25} = -71.049$  (CHCl<sub>3</sub>, *c* = 0.68 g/100mL, CHCl<sub>3</sub> for 99% *ee*); IR (neat)  $\nu_{max}$  3317, 2924, 1697, 1273, 1149 and 786 cm<sup>-1</sup>; <sup>1</sup>H NMR (400 MHz, CDCl<sub>3</sub>)  $\delta$  7.24 (1H, dd, *J* = 2.4, 7.5 Hz), 7.10 – 7.05 (1H, m), 6.79 (1H, dd, *J* = 3.9, 8.6 Hz), 5.51 (1H, d, *J* = 12.0 Hz), 5.44 (1H, dd, *J* = 4.3, 12 Hz), 3.81 – 3.70 (2H, m), 3.36 (1H, d, *J* = 10.4 Hz), 3.23 (3H, s), 2.45 – 2.34 (1H, m); <sup>13</sup>C NMR (100 MHz, CDCl<sub>3</sub>, DEPT-135)  $\delta$  177.7 (C, N-C=O), 160.2 (C-F, d, *J* = 242 Hz), 138.9 (C, d, *J* = 2 Hz), 128.4 (C, d, *J* = 7 Hz), 124.3 (CF<sub>3</sub>, q, *J* = 276 Hz), 117.4 (CH, d, *J* = 24 Hz), 114.3 (CH, d, *J* = 25 Hz), 109.7 (CH, d, *J* = 8 Hz), 88.3 (CH), 77.1 (C), 44.7 (CH<sub>2</sub>, q, *J* = 34 Hz), 40.4 (CH<sub>2</sub>), 27.1 (CH<sub>3</sub>); <sup>19</sup>F NMR (376MHz, CDCl<sub>3</sub>)  $\delta$  -70.96, -117.53; HRMS (ESI) *m/z*: 359.0447 [M + Na]<sup>+</sup>, calcd for C<sub>13</sub>H<sub>12</sub>O<sub>2</sub>N<sub>2</sub>F<sub>4</sub>NaS; Found 359.0444.

**(3R,4'R)-7-fluoro-4'-hydroxy-1-methyl-3'-(2,2,2-trifluoroethyl)spiro[indoline-3,2'-thiazolidin]-2-one (4c):**

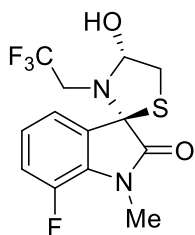

Prepared by following general procedure **C** purified by column chromatography using hexane and isolated product **4c** in 96% yield as a white solid with M. P. 124 - 127 °C.; The enantiomeric excess (*ee*) was determined by chiral stationary phase HPLC using a Phenomenex cellulose-5 column (hexane/EtOAc = 85:15, flow rate 0.5 mL/min,  $\lambda = 254$  nm),  $t_R = 10.260$  min (minor),  $t_R = 11.502$  min (major),  $[\alpha]_D^{25} = -$

**81.941 (CHCl<sub>3</sub>, c = 0.88 g/100mL, CHCl<sub>3</sub> for 91% ee);** IR (neat)  $\nu_{\max}$  1693, 1477, 1149, 1107, 1014 and 779 cm<sup>-1</sup>; <sup>1</sup>H NMR (400 MHz, CDCl<sub>3</sub>)  $\delta$  7.29 – 7.25 (1H, m), 7.13 – 7.05 (2H, m), 5.44 (2H, s), 3.80 – 3.70 (2H, m), 3.43 (3H, d, *J* = 2.7 Hz), 3.35 (1H, d, *J* = 10.5 Hz), 2.48 – 2.37 (1H, m); <sup>13</sup>C NMR (100 MHz, CDCl<sub>3</sub>, DEPT-135)  $\delta$  177.7 (C, N-C=O), 147.7 (C-F, d, *J* = 244 Hz), 129.7 (C, d, *J* = 9 Hz), 129.4 (C, d, *J* = 2 Hz), 124.9 (CH, d, *J* = 6 Hz), 124.3 (CF<sub>3</sub>, q, *J* = 277 Hz), 122.2 (CH, d, *J* = 3 Hz), 118.6 (CH, d, *J* = 19 Hz), 88.2 (CH, d, *J* = 2 Hz), 76.8 (C), 44.6 (CH<sub>2</sub>, q, *J* = 33 Hz), 40.4 (CH<sub>2</sub>), 29.6 (CH<sub>3</sub>, d, *J* = 6 Hz); <sup>19</sup>F NMR (376MHz, CDCl<sub>3</sub>)  $\delta$  -70.89, -135.87; HRMS (ESI) *m/z*: 359.04478 [M + Na]<sup>+</sup>, calcd for C<sub>13</sub>H<sub>12</sub>O<sub>2</sub>N<sub>2</sub>F<sub>4</sub>NaS; Found 359.04514.

**(3R,4'R)-5-chloro-4'-hydroxy-1-methyl-3'-(2,2,2-trifluoroethyl)spiro[indoline-3,2'-thiazolidin]-2-one (4d):**

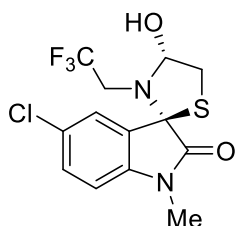

Prepared by following general procedure **C** purified by column chromatography using hexane and isolated product **4d** in 75% yield as a colourless semi solid. The enantiomeric excess (*ee*) was determined by chiral stationary phase HPLC using a Phenomenex cellulose-5 column (hexane/EtOAc = 80:20, flow rate 0.5 mL/min,  $\lambda$  = 254 nm), *t<sub>R</sub>* = 9.789 min (minor), *t<sub>R</sub>* = 10.995 min (major),  $[\alpha]_D^{25}$  = -

**42.218 (CHCl<sub>3</sub>, c = 0.56 g/100mL, CHCl<sub>3</sub> for 87% ee);** IR (neat)  $\nu_{\max}$  1689, 1149, 1095, 1018, 817 and 547 cm<sup>-1</sup>; <sup>1</sup>H NMR (400 MHz, CDCl<sub>3</sub>)  $\delta$  7.47 (1H, s), 7.34 (1H, d, *J* = 8.3 Hz), 6.79 (1H, d, *J* = 8 Hz), 5.47 – 5.40 (2H, m), 3.80 – 3.70 (2H, m), 3.36 (1H, d, *J* = 10.4 Hz), 3.23 (3H, s), 2.45 – 2.36 (1H, m); <sup>13</sup>C NMR (100 MHz, CDCl<sub>3</sub>, DEPT-135)  $\delta$  177.5 (C, N-C=O), 141.6 (C), 130.8 (CH), 129.9 (C), 128.3 (C), 126.8 (CH), 124.3 (CF<sub>3</sub>, q, *J* = 276 Hz), 109.9 (CH), 88.3 (CH), 76.9 (C), 44.7 (CH<sub>2</sub>, q, *J* = 34 Hz), 40.5 (CH<sub>2</sub>), 27.1 (CH<sub>3</sub>); <sup>19</sup>F NMR (376MHz, CDCl<sub>3</sub>)  $\delta$  -70.96; HRMS (ESI) *m/z*: 375.01523 [M + Na]<sup>+</sup>, calcd for C<sub>13</sub>H<sub>12</sub>ClO<sub>2</sub>N<sub>2</sub>F<sub>3</sub>NaS; Found 375.01559.

**(3R,4'R)-5-bromo-4'-hydroxy-1-methyl-3'-(2,2,2-trifluoroethyl)spiro[indoline-3,2'-thiazolidin]-2-one (4e):**

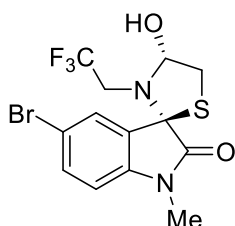

Prepared by following general procedure **C** purified by column chromatography using hexane and isolated product **4e** in 71% yield as a white solid with M. P. 183 - 188 °C.; The enantiomeric excess (*ee*) was determined by chiral stationary phase HPLC using a Phenomenex cellulose-5 column (hexane/EtOAc = 85:15, flow rate 0.5 mL/min,  $\lambda$  = 254 nm), *t<sub>R</sub>* = 12.777 min (minor), *t<sub>R</sub>* = 15.335 min

(major),  $[\alpha]_D^{25}$  = **-52.029 (CHCl<sub>3</sub>, c = 0.69 g/100mL, CHCl<sub>3</sub> for 87% ee);** IR (neat)  $\nu_{\max}$  1685, 1608, 1149, 1022, 975 and 813 cm<sup>-1</sup>; <sup>1</sup>H NMR (400 MHz, CDCl<sub>3</sub>)  $\delta$  7.59 (1H, d, *J* = 0.9 Hz), 7.48 (1H, dd, *J* = 2, 8.3 Hz), 6.73 (1H, d, *J* = 8.3 Hz), 5.46 – 5.38 (2H, m), 3.79 – 3.69 (2H, m), 3.35 (1H, d, *J* = 10.4 Hz), 3.21 (3H, s), 2.44 – 2.33 (1H, m); <sup>13</sup>C NMR (100 MHz, CDCl<sub>3</sub>, DEPT-135)  $\delta$  177.3 (C, N-C=O), 142.1 (C), 133.7 (CH), 129.6 (CH), 128.6 (C), 124.3 (CF<sub>3</sub>, q, *J* = 277 Hz), 117.1 (C), 110.4 (CH), 88.3 (CH), 76.8 (C), 44.7 (CH<sub>2</sub>, q, *J* = 34 Hz), 40.5 (CH<sub>2</sub>), 27.1 (CH<sub>3</sub>); <sup>19</sup>F NMR (376MHz, CDCl<sub>3</sub>)  $\delta$  -70.89; HRMS (ESI) *m/z*: 418.96472 [M + Na]<sup>+</sup>, calcd for C<sub>13</sub>H<sub>12</sub>BrO<sub>2</sub>N<sub>2</sub>F<sub>3</sub>NaS; Found 418.96350.

**(3R,4'R)-4'-hydroxy-5-iodo-1-methyl-3'-(2,2,2-trifluoroethyl)spiro[indoline-3,2'-thiazolidin]-2-one (4f):**

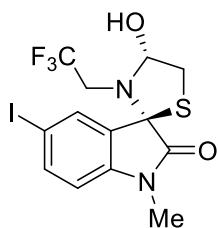

Prepared by following general procedure **C** purified by column chromatography using hexane and isolated product **4f** in 53% yield as a yellowish white solid with M. P. 115 - 119 °C.; The enantiomeric excess (*ee*) was determined by chiral stationary phase HPLC using a Phenomenex cellulose-5 column (hexane/EtOAc = 80:20, flow rate 0.5 mL/min,  $\lambda = 254$  nm),  $t_R = 19.087$  min (minor),  $t_R = 24.236$  min (major),  $[\alpha]_D^{25} = -17.000$  ( $\text{CHCl}_3$ ,  $c = 0.10$  g/mL,  $\text{CHCl}_3$  for 88% *ee*); IR (neat)  $\nu_{\text{max}}$  1689, 1604, 1481, 1149, 1103 and 810  $\text{cm}^{-1}$ ;  $^1\text{H NMR}$  (400 MHz,  $\text{CDCl}_3$ )  $\delta$  7.76 (1H, s), 7.68 (1H, dd,  $J = 1.6, 8.2$  Hz), 6.62 (1H, d,  $J = 8.2$  Hz), 5.45 – 5.37 (2H, m), 3.78 – 3.68 (2H, m), 3.34 (1H, d,  $J = 10.4$  Hz), 3.20 (3H, s), 2.44 – 2.33 (1H, m);  $^{13}\text{C NMR}$  (100 MHz,  $\text{CDCl}_3$ , DEPT-135)  $\delta$  177.1 (C, N-C=O), 142.8 (C), 139.6 (CH), 135.3 (CH), 128.6 (C), 124.3 ( $\text{CF}_3$ , q,  $J = 277$  Hz), 110.9 (CH), 88.3 (CH), 86.9 (C), 76.6 (C), 44.7 ( $\text{CH}_2$ , q,  $J = 34$  Hz), 40.5 ( $\text{CH}_2$ ), 27.0 ( $\text{CH}_3$ );  $^{19}\text{F NMR}$  (376MHz,  $\text{CDCl}_3$ )  $\delta$  -70.97; HRMS (ESI)  $m/z$ : 466.95085 [ $\text{M} + \text{Na}$ ] $^+$ , calcd for  $\text{C}_{13}\text{H}_{12}\text{IO}_2\text{N}_2\text{F}_3\text{NaS}$ ; Found 466.95175.

**(3R,4'R)-4'-hydroxy-1,5-dimethyl-3'-(2,2,2-trifluoroethyl)spiro[indoline-3,2'-thiazolidin]-2-one (4g):**

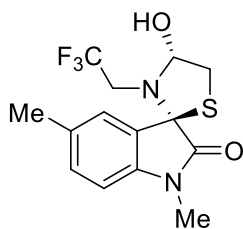

Prepared by following general procedure **C** purified by column chromatography using hexane and isolated product **4g** in 88% yield as a white solid with M. P. 148 - 152 °C.; The enantiomeric excess (*ee*) was determined by chiral stationary phase HPLC using a Phenomenex cellulose-5 column (hexane/EtOAc = 80:20, flow rate 0.5 mL/min,  $\lambda = 254$  nm),  $t_R = 10.755$  min (minor),  $t_R = 12.956$  min (major),  $[\alpha]_D^{25} = -56.837$  ( $\text{CHCl}_3$ ,  $c = 0.87$  g/100mL,  $\text{CHCl}_3$  for 93% *ee*); IR (neat)  $\nu_{\text{max}}$  1681, 1273, 1141, 1103, 1026 and 817  $\text{cm}^{-1}$ ;  $^1\text{H NMR}$  (400 MHz,  $\text{CDCl}_3$ )  $\delta$  7.31 (1H, s), 7.16 (1H, d,  $J = 7.9$  Hz), 6.73 (1H, t,  $J = 7.9$  Hz), 5.65 (1H, d,  $J = 11.9$  Hz), 5.45 (1H, dd,  $J = 4.6, 11.9$  Hz), 3.78 – 3.67 (2H, m), 3.35 (1H, d,  $J = 10.5$  Hz), 3.21 (3H, s), 2.46 – 2.38 (1H, m), 2.35 (3H, s);  $^{13}\text{C NMR}$  (100 MHz,  $\text{CDCl}_3$ , DEPT-135)  $\delta$  177.8 (C, N-C=O), 140.8 (C), 134.3 (C), 131.1 (CH), 127.0 (CH), 126.2 (C), 124.4 ( $\text{CF}_3$ , q,  $J = 277$  Hz), 108.7 (CH), 88.1 (CH), 76.8 (C), 44.5 ( $\text{CH}_2$ , q,  $J = 33$  Hz), 40.3 ( $\text{CH}_2$ ), 26.9 ( $\text{CH}_3$ ), 21.1 ( $\text{CH}_3$ );  $^{19}\text{F NMR}$  (376MHz,  $\text{CDCl}_3$ )  $\delta$  -70.89; HRMS (ESI)  $m/z$ : 355.06985 [ $\text{M} + \text{Na}$ ] $^+$ , calcd for  $\text{C}_{14}\text{H}_{15}\text{O}_2\text{N}_2\text{F}_3\text{NaS}$ ; Found 355.07025.

**(3R,4'R)-4'-hydroxy-5-methoxy-1-methyl-3'-(2,2,2-trifluoroethyl)spiro[indoline-3,2'-thiazolidin]-2-one (4h):**

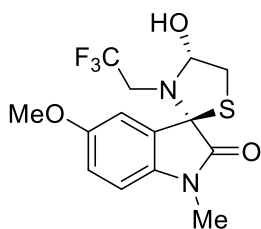

Prepared by following general procedure **C** purified by column chromatography using hexane and isolated product **4h** in 89% yield as a colourless semi solid. The enantiomeric excess (*ee*) was determined by chiral stationary phase HPLC using a Phenomenex cellulose-5 column (hexane/EtOAc = 80:20, flow rate 0.5 mL/min,  $\lambda = 254$  nm),  $t_R = 24.160$  min (minor),  $t_R = 33.342$  min (major),

$[\alpha]_D^{25} = -57.008$  ( $\text{CHCl}_3$ ,  $c = 1.40$  g/100mL,  $\text{CHCl}_3$  for 91% ee); IR (neat)  $\nu_{\text{max}}$  3332, 1681, 1496, 1273, 979 and 563  $\text{cm}^{-1}$ ;  $^1\text{H NMR}$  (400 MHz,  $\text{CDCl}_3$ )  $\delta$  7.08 (1H, d,  $J = 1.6$  Hz), 6.89 (1H, d,  $J = 8.8$  Hz), 6.75 (1H, d,  $J = 8.8$  Hz), 5.68 (1H, d,  $J = 12$  Hz), 5.44 (1H, d,  $J = 12$  Hz), 3.80 (3H, s), 3.77 – 3.69 (2H, m), 3.35 (1H, d,  $J = 10.4$  Hz), 3.20 (3H, s), 2.46 – 2.36 (1H, m);  $^{13}\text{C NMR}$  (100 MHz,  $\text{CDCl}_3$ , DEPT-135)  $\delta$  177.6 (C, N-C=O), 157.3 (C), 136.4 (C), 127.5 (C), 124.5 ( $\text{CF}_3$ , q,  $J = 277$  Hz), 116.6 (CH), 112.2 (CH), 109.6 (CH), 88.1 (CH), 77.0 (C), 55.9 (CH), 44.5 ( $\text{CH}_2$ , q,  $J = 33$  Hz), 40.3 ( $\text{CH}_2$ ), 26.9 ( $\text{CH}_3$ );  $^{19}\text{F NMR}$  (376MHz,  $\text{CDCl}_3$ )  $\delta$  -70.82; HRMS (ESI)  $m/z$ : 371.06477  $[\text{M} + \text{Na}]^+$ , calcd for  $\text{C}_{14}\text{H}_{15}\text{O}_3\text{N}_2\text{F}_3\text{NaS}$ ; Found 371.06409.

**(3R,4'R)-4'-hydroxy-1-methyl-3'-(2,2,2-trifluoroethyl)-5-(trifluoromethoxy)spiro[indoline-3,2'-thiazolidin]-2-one (4i):**

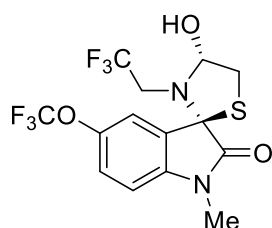

Prepared by following general procedure **C** purified by column chromatography using hexane and isolated product **4i** in 80% yield as a colourless semi solid. The enantiomeric excess (ee) was determined by chiral stationary phase HPLC using a Phenomenex cellulose-5 column (hexane/EtOAc = 85:15, flow rate 0.5 mL/min,  $\lambda = 254$  nm),  $t_R = 10.171$  min (minor),  $t_R = 11.492$  min (major),  $[\alpha]_D^{25} = -53.220$  ( $\text{CHCl}_3$ ,  $c = 0.29$  g/100mL,  $\text{CHCl}_3$  for 85% ee); IR (neat)  $\nu_{\text{max}}$  2924, 1705, 1496, 1257, 1157 and 825  $\text{cm}^{-1}$ ;  $^1\text{H NMR}$  (400 MHz,  $\text{CDCl}_3$ )  $\delta$  7.39 (1H, s), 7.25 – 7.22 (1H, m), 6.85 (1H, d,  $J = 8.5$  Hz), 5.46 – 5.38 (2H, m), 3.81 – 3.71 (2H, m), 3.36 (1H, d,  $J = 10.4$  Hz), 3.24 (3H, s), 2.43 – 2.32 (1H, m);  $^{13}\text{C NMR}$  (100 MHz,  $\text{CDCl}_3$ , DEPT-135)  $\delta$  177.8 (C, N-C=O), 145.9 (C), 141.6 (C), 128.3 (C), 124.2 ( $\text{CF}_3$ , q,  $J = 277$  Hz), 124.1 (CH), 120.4 ( $\text{OCF}_3$ , q,  $J = 255$  Hz), 120.4 (CH), 109.6 (CH), 88.4 (CH), 76.9 (C), 44.7 ( $\text{CH}_2$ , q,  $J = 34$  Hz), 40.5 ( $\text{CH}_2$ ), 21.1 ( $\text{CH}_3$ );  $^{19}\text{F NMR}$  (376MHz,  $\text{CDCl}_3$ )  $\delta$  -58.53, -71.21; HRMS (ESI)  $m/z$ : 425.03650  $[\text{M} + \text{Na}]^+$ , calcd for  $\text{C}_{14}\text{H}_{12}\text{O}_3\text{N}_2\text{F}_6\text{NaS}$ ; Found 425.03677.

**(3R,4'R)-5,7-dibromo-4'-hydroxy-1-methyl-3'-(2,2,2-trifluoroethyl)spiro[indoline-3,2'-thiazolidin]-2-one (4k):**

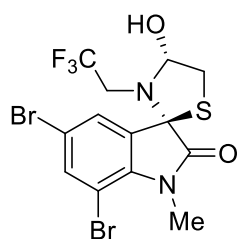

Prepared by following general procedure **C** purified by column chromatography using hexane and isolated product **4k** in 52% yield as a colourless semi solid. The enantiomeric excess (ee) was determined by chiral stationary phase HPLC using a Phenomenex cellulose-5 column (hexane/EtOAc = 85:15, flow rate 0.5 mL/min,  $\lambda = 254$  nm),  $t_R = 10.683$  min (minor),  $t_R = 12.082$  min (major),  $[\alpha]_D^{25} = -76.571$  ( $\text{CHCl}_3$ ,  $c = 0.35$  g/100mL,  $\text{CHCl}_3$  for 86% ee); IR (neat)  $\nu_{\text{max}}$  2924, 1705, 1458, 1149, 1111 and 864  $\text{cm}^{-1}$ ;  $^1\text{H NMR}$  (400 MHz,  $\text{CDCl}_3$ )  $\delta$  7.62 (1H, d,  $J = 1.9$  Hz), 7.54 – 7.53 (1H, m), 5.43 (1H, dd,  $J = 4.4, 12.1$  Hz), 5.29 (1H, d,  $J = 12.1$  Hz), 3.80 – 3.70 (2H, m), 3.58 (3H, s), 3.35 (1H, d,  $J = 10.4$  Hz), 2.44 – 2.33 (1H, m);  $^{13}\text{C NMR}$  (100 MHz,  $\text{CDCl}_3$ , DEPT-135)  $\delta$  177.9 (C, N-C=O), 139.5 (C), 138.2 (CH), 131.6 (C), 128.9 (CH), 124.2 ( $\text{CF}_3$ , q,  $J = 277$  Hz), 117.3 (C), 103.5 (C), 88.4 (CH), 76.2 (C), 44.8 ( $\text{CH}_2$ , q,  $J = 33$  Hz), 40.6 ( $\text{CH}_2$ ), 30.7 ( $\text{CH}_3$ );  $^{19}\text{F NMR}$  (376MHz,  $\text{CDCl}_3$ )  $\delta$  -70.87; HRMS (ESI)  $m/z$ : 496.87523  $[\text{M} + \text{Na}]^+$ , calcd for  $\text{C}_{13}\text{H}_{11}\text{O}_2\text{N}_2\text{Br}_2\text{F}_3\text{NaS}$ ; Found 496.87429.

**(3R,4'R)-5-chloro-4'-hydroxy-1,7-dimethyl-3'-(2,2,2-trifluoroethyl)spiro[indoline-3,2'-thiazolidin]-2-one (4l):**

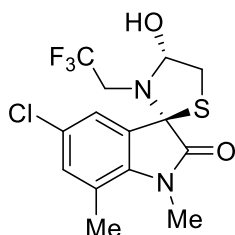

Prepared by following general procedure **C** purified by column chromatography using hexane and isolated product **4l** in 67% yield as a white solid with M. P. 154 - 157 °C.; The enantiomeric excess (ee) was determined by chiral stationary phase HPLC using a Phenomenex cellulose-5 column (hexane/EtOAc = 80:20, flow rate 0.5 mL/min,  $\lambda$  = 254 nm),  $t_R$  = 10.115 min (minor),  $t_R$  = 12.256 min (major),  $[\alpha]_D^{25}$  = -73.802 (CHCl<sub>3</sub>, c = 0.43 g/100mL, CHCl<sub>3</sub> for 74% ee); IR (neat)  $\nu_{max}$  1701, 1462, 1273, 1107, 1087, and 729 cm<sup>-1</sup>; <sup>1</sup>H NMR (400 MHz, CDCl<sub>3</sub>)  $\delta$  7.30 (1H, s), 7.08 (1H, s), 5.52 (1H, d,  $J$  = 11.9 Hz), 5.43 (1H, dd,  $J$  = 4.4, 11.9 Hz), 3.77 – 3.67 (2H, m), 3.47 (3H, s), 3.34 (1H, d,  $J$  = 10.4 Hz), 2.53 (3H, s), 2.45 – 2.34 (1H, m); <sup>13</sup>C NMR (100 MHz, CDCl<sub>3</sub>, DEPT-135)  $\delta$  178.2 (C, N-C=O), 139.3 (C), 134.0 (CH), 129.5 (CH), 129.1 (CH), 124.6 (CH), 124.3 (CF<sub>3</sub>, q,  $J$  = 277 Hz), 122.2 (C), 88.2 (CH), 76.4 (C), 44.6 (CH<sub>2</sub>, q,  $J$  = 34 Hz), 40.5 (CH<sub>2</sub>), 30.4 (CH<sub>3</sub>), 18.6 (CH<sub>3</sub>); <sup>19</sup>F NMR (376MHz, CDCl<sub>3</sub>)  $\delta$  -70.85; HRMS (ESI) m/z: 389.03088 [M + Na]<sup>+</sup>, calcd for C<sub>14</sub>H<sub>14</sub>O<sub>2</sub>N<sub>2</sub>ClF<sub>3</sub>NaS; Found 389.03033.

**(3R,4'R)-4'-hydroxy-3'-(2,2,2-trifluoroethyl)spiro[indoline-3,2'-thiazolidin]-2-one (4m):**

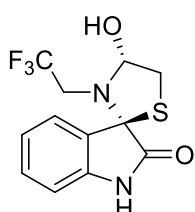

Prepared by following general procedure **C** purified by column chromatography using hexane and isolated product **4m** in 56% yield as a yellow semi solid. The enantiomeric excess (ee) was determined by chiral stationary phase HPLC using a Phenomenex cellulose-5 column (hexane/EtOAc = 85:15, flow rate 0.5 mL/min,  $\lambda$  = 254 nm),  $t_R$  = 18.082 min (minor),  $t_R$  = 23.175 min (major),  $[\alpha]_D^{25}$  = -85.299 (CHCl<sub>3</sub>, c = 0.77 g/100mL, CHCl<sub>3</sub> for 89% ee); IR (neat)  $\nu_{max}$  3224, 2924, 1705, 1149, 1111 and 756 cm<sup>-1</sup>; <sup>1</sup>H NMR (400 MHz, CDCl<sub>3</sub>)  $\delta$  8.68 (1H, s), 7.47 (1H, d,  $J$  = 7.5 Hz), 7.31 (1H, t,  $J$  = 7.7 Hz), 7.15 (1H, d,  $J$  = 7.6 Hz), 6.89 (1H, d,  $J$  = 7.8 Hz), 5.48 (1H, dd,  $J$  = 4.4, 11.9 Hz), 5.40 (1H, d,  $J$  = 12 Hz), 3.82 – 3.72 (2H, m), 3.36 (1H, d,  $J$  = 10.5 Hz), 2.59 – 2.48 (1H, m); <sup>13</sup>C NMR (100 MHz, CDCl<sub>3</sub>, DEPT-135)  $\delta$  179.7 (C, N-C=O), 140.1 (C), 130.8 (CH), 126.9 (C), 126.8 (C), 124.4 (CH), 124.4 (CF<sub>3</sub>, q,  $J$  = 277 Hz), 110.6 (CH), 88.1 (CH), 66.5 (C), 44.5 (CH<sub>2</sub>, q,  $J$  = 34 Hz), 40.3 (CH<sub>2</sub>); <sup>19</sup>F NMR (376MHz, CDCl<sub>3</sub>)  $\delta$  -70.87; HRMS (ESI) m/z: 327.03855 [M + Na]<sup>+</sup>, calcd for C<sub>12</sub>H<sub>11</sub>O<sub>2</sub>N<sub>2</sub>F<sub>3</sub>NaS; Found 327.03732.

**(3R,4'R)-1-benzyl-4'-hydroxy-3'-(2,2,2-trifluoroethyl)spiro[indoline-3,2'-thiazolidin]-2-one (4n):**

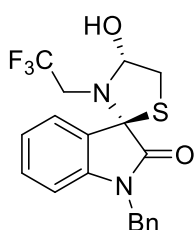

Prepared by following general procedure **C** purified by column chromatography using hexane and isolated product **4n** in 82% yield as a white solid with M. P. 131 - 135 °C.; The enantiomeric excess (ee) was determined by chiral stationary phase HPLC using a Phenomenex cellulose-5 column (hexane/EtOAc = 85:15, flow rate 0.5 mL/min,  $\lambda$  = 254 nm),  $t_R$  = 10.999 min (minor),  $t_R$  = 13.890 min (major),  $[\alpha]_D^{25}$  = -25.280 (CHCl<sub>3</sub>, c = 0.73 g/100mL, CHCl<sub>3</sub> for 89% ee); IR (neat)  $\nu_{max}$  1685, 1612, 1276, 1138, 1107, and 756 cm<sup>-1</sup>; <sup>1</sup>H NMR (400 MHz, CDCl<sub>3</sub>)  $\delta$  7.49 (1H, d,  $J$  = 7.4 Hz), 7.36 – 7.23 (6H, m), 7.13 (1H, t,  $J$  = 8 Hz), 6.74 (1H, d,  $J$  = 7.8 Hz), 5.62 (1H, d,  $J$  = 12 Hz), 5.49 (1H, dd,  $J$  = 4.4, 11.9



Hz), 4.94 (1H, d,  $J = 15.5$  Hz), 4.83 (1H, d,  $J = 15.5$  Hz), 3.84 – 3.73 (2H, m), 3.39 (1H, d,  $J = 10.5$  Hz), 2.50 – 2.39 (1H, m);  $^{13}\text{C}$  NMR (100 MHz,  $\text{CDCl}_3$ , DEPT-135)  $\delta$  178.2 (C, N-C=O), 142.3 (C), 134.9 (C), 130.8 (CH), 129.1 (2CH), 128.2 (CH), 127.3 (2CH), 126.5 (CH), 126.2 (C), 124.4 (CH), 124.4 (CF<sub>3</sub>, q,  $J = 277$  Hz), 109.9 (C), 88.1 (CH), 77.2 (C), 44.5 (CH<sub>2</sub>), 44.5 (CH<sub>2</sub>, q,  $J = 33$  Hz), 40.3 (CH<sub>2</sub>);  $^{19}\text{F}$  NMR (376MHz,  $\text{CDCl}_3$ )  $\delta$  -70.84; HRMS (ESI)  $m/z$ : 417.08550 [ $M + \text{Na}$ ]<sup>+</sup>, calcd for C<sub>19</sub>H<sub>17</sub>O<sub>2</sub>N<sub>2</sub>F<sub>3</sub>NaS; Found 417.08658.

**(3R,4'R)-1-benzyl-5-chloro-4'-hydroxy-3'-(2,2,2-trifluoroethyl)spiro[indoline-3,2'-thiazolidin]-2-one (4o):**

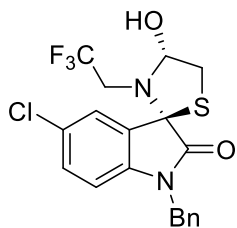

Prepared by following general procedure **C** purified by column chromatography using hexane and isolated product **4o** in 72% yield as a yellow semi solid. The enantiomeric excess (*ee*) was determined by chiral stationary phase HPLC using a Phenomenex cellulose-5 column (hexane/EtOAc = 85:15, flow rate 0.5 mL/min,  $\lambda = 254$  nm),  $t_R = 10.368$  min (minor),  $t_R = 12.620$  min (major),  $[\alpha]_D^{25} = -45.308$

( $\text{CHCl}_3$ ,  $c = 1.45$  g/100mL,  $\text{CHCl}_3$  for 89% *ee*); IR (neat)  $\nu_{\text{max}}$  3340, 2924, 1697, 1481, 1149, and 732  $\text{cm}^{-1}$ ;  $^1\text{H}$  NMR (400 MHz,  $\text{CDCl}_3$ )  $\delta$  7.47 – 7.46 (1H, m), 7.37 – 7.26 (4H, m), 7.24 (1H, br s), 7.21 (1H, dd,  $J = 2.2, 8.4$  Hz), 6.66 (1H, d,  $J = 8.4$  Hz), 5.57 – 5.44 (2H, m), 4.93 (1H, d,  $J = 15.5$  Hz), 4.82 (1H, d,  $J = 15.5$  Hz), 3.85 – 3.74 (2H, m), 3.39 (1H, d,  $J = 10.5$  Hz), 2.47 – 2.37 (1H, m);  $^{13}\text{C}$  NMR (100 MHz,  $\text{CDCl}_3$ , DEPT-135)  $\delta$  177.8 (C, N-C=O), 140.7 (C), 134.4 (C), 130.8 (CH), 130.2 (C), 129.2 (2CH), 128.4 (C), 128.3 (CH), 127.2 (2CH), 126.8 (CH), 124.3 (CF<sub>3</sub>, q,  $J = 277$  Hz), 111.0 (CH), 88.3 (CH), 76.9 (C), 44.7 (CH<sub>2</sub>), 44.6 (CH<sub>2</sub>, q,  $J = 33$  Hz), 40.5 (CH<sub>2</sub>);  $^{19}\text{F}$  NMR (376MHz,  $\text{CDCl}_3$ )  $\delta$  -70.89; HRMS (ESI)  $m/z$ : 451.04653 [ $M + \text{Na}$ ]<sup>+</sup>, calcd for C<sub>19</sub>H<sub>16</sub>O<sub>2</sub>N<sub>2</sub>ClF<sub>3</sub>NaS; Found 451.04450.

**(3R,4'R)-1-benzyl-5-bromo-4'-hydroxy-3'-(2,2,2-trifluoroethyl)spiro[indoline-3,2'-thiazolidin]-2-one (4p):**

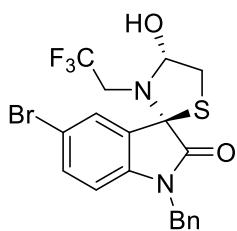

Prepared by following general procedure **C** purified by column chromatography using hexane and isolated product **4p** in 63% yield as a yellow semi solid. The enantiomeric excess (*ee*) was determined by chiral stationary phase HPLC using a Phenomenex cellulose-5 column (hexane/EtOAc = 85:15, flow rate 0.5 mL/min,  $\lambda = 254$  nm),  $t_R = 10.635$  min (minor),  $t_R = 12.967$  min (major),  $[\alpha]_D^{25} = -38.957$

( $\text{CHCl}_3$ ,  $c = 0.93$  g/100mL,  $\text{CHCl}_3$  for 85% *ee*); IR (neat)  $\nu_{\text{max}}$  2924, 1705, 1473, 1273, 1149, and 810  $\text{cm}^{-1}$ ;  $^1\text{H}$  NMR (400 MHz,  $\text{CDCl}_3$ )  $\delta$  7.60 (1H, s), 7.37 – 7.28 (5H, m), 7.24 (1H, br s), 6.61 (1H, d,  $J = 8.4$  Hz), 5.50 – 5.43 (2H, m), 4.87 (2H, q,  $J = 15.5, 43.1$  Hz), 3.84 – 3.76 (2H, m), 3.39 (1H, d,  $J = 10.4$  Hz), 2.48 – 2.37 (1H, m);  $^{13}\text{C}$  NMR (100 MHz,  $\text{CDCl}_3$ , DEPT-135)  $\delta$  177.6 (C, N-C=O), 141.2 (C), 134.4 (C), 133.6 (CH), 129.6 (CH), 129.2 (2CH), 128.5 (C), 128.4 (C), 127.2 (2CH), 124.3 (CF<sub>3</sub>, q,  $J = 277$  Hz), 117.2 (C), 111.5 (CH), 88.3 (CH), 76.9 (C), 44.6 (CH<sub>2</sub>, q,  $J = 34$  Hz), 44.6 (CH<sub>2</sub>), 40.5 (CH<sub>2</sub>);  $^{19}\text{F}$  NMR (376MHz,  $\text{CDCl}_3$ )  $\delta$  -70.89; HRMS (ESI)  $m/z$ : 494.99602 [ $M + \text{Na}$ ]<sup>+</sup>, calcd for C<sub>19</sub>H<sub>16</sub>O<sub>2</sub>N<sub>2</sub>BrF<sub>3</sub>NaS; Found 494.99367.

**(3R,4'R)-1-benzyl-4'-hydroxy-3'-(2,2,2-trifluoroethyl)-5-(trifluoromethoxy)spiro[indoline-3,2'-thiazolidin]-2-one (4q):**

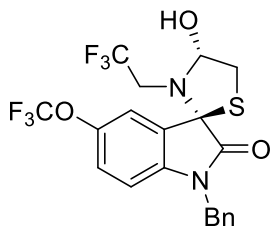

Prepared by following general procedure **C** purified by column chromatography using hexane and isolated product **4q** in 75% yield as a pale yellow solid with M. P. 134 - 137 °C.; The enantiomeric excess (*ee*) was determined by chiral stationary phase HPLC using a Phenomenex cellulose-5 column (hexane/EtOAc = 85:15, flow rate 0.5 mL/min,  $\lambda = 254$  nm),  $t_R = 8.787$  min (minor),  $t_R = 10.142$  min (major),  $[\alpha]_D^{25} = -30.400$  (CHCl<sub>3</sub>, *c* = 0.12 g/100mL, CHCl<sub>3</sub> for 89% *ee*); IR (neat)  $\nu_{\max}$  1693, 1489, 1249, 1145, 1080, and 698 cm<sup>-1</sup>; <sup>1</sup>H NMR (400 MHz, CDCl<sub>3</sub>)  $\delta$  7.38 – 7.30 (4H, m), 7.27 (2H, d, *J* = 8.4 Hz), 7.11 (1H, d, *J* = 8.4 Hz), 6.73 (1H, d, *J* = 8.5 Hz), 5.51 – 5.42 (2H, m), 4.96 (1H, d, *J* = 15.5 Hz), 4.82 (1H, d, *J* = 15.5 Hz), 3.87 – 3.77 (2H, m), 3.40 (1H, d, *J* = 10.4 Hz), 2.46 – 2.35 (1H, m); <sup>13</sup>C NMR (100 MHz, CDCl<sub>3</sub>, DEPT-135)  $\delta$  178.1 (C, N-C=O), 145.9 (C), 140.7 (C), 134.4 (C), 129.2 (2CH), 128.4 (CH), 128.4 (C), 127.3 (2CH), 124.2 (CF<sub>3</sub>, q, *J* = 276 Hz), 123.9 (CH), 120.4 (CF<sub>3</sub>, q, *J* = 256 Hz), 120.3 (CH), 110.6 (CH), 88.4 (CH), 76.9 (C), 44.7 (CH<sub>2</sub>), 44.6 (CH<sub>2</sub>), 40.5 (CH<sub>2</sub>, q, *J* = 34 Hz); <sup>19</sup>F NMR (376MHz, CDCl<sub>3</sub>)  $\delta$  -58.49, -71.13; HRMS (ESI) *m/z*: 501.06780 [M + Na]<sup>+</sup>, calcd for C<sub>20</sub>H<sub>16</sub>O<sub>3</sub>N<sub>2</sub>F<sub>6</sub>NaS; Found 501.06880.

**(3R,4'R)-1-(4-bromobenzyl)-4'-hydroxy-3'-(2,2,2-trifluoroethyl)-5-(trifluoromethoxy)spiro[indoline-3,2'-thiazolidin]-2-one (4r):**

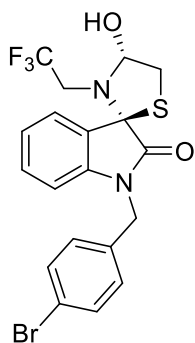

Prepared by following general procedure **C** purified by column chromatography using hexane and isolated product **4r** in 56% yield as a yellow semi solid. The enantiomeric excess (*ee*) was determined by chiral stationary phase HPLC using a Phenomenex I-A column (hexane/EtOAc = 85:15, flow rate 1 mL/min,  $\lambda = 254$  nm),  $t_R = 7.835$  min (minor),  $t_R = 11.093$  min (major),  $[\alpha]_D^{25} = -46.402$  (CHCl<sub>3</sub>, *c* = 1.20 g/100mL, CHCl<sub>3</sub> for 93% *ee*); IR (neat)  $\nu_{\max}$  2924, 1697, 1465, 1342, 1149, and 756 cm<sup>-1</sup>; <sup>1</sup>H NMR (400 MHz, CDCl<sub>3</sub>)  $\delta$  7.51 – 7.46 (3H, m), 7.28 – 7.24 (1H, m), 7.19 – 7.13 (3H, m), 6.71 (1H, d, *J* = 7.8 Hz), 5.56 – 5.47 (2H, m), 4.92 (1H, d, *J* = 15.6 Hz), 4.74 (1H, d, *J* = 15.6 Hz), 3.83 – 3.73 (2H, m), 3.39 (1H, d, *J* = 10.6 Hz), 2.48 – 2.37 (1H, m); <sup>13</sup>C NMR (100 MHz, CDCl<sub>3</sub>, DEPT-135)  $\delta$  178.2 (C, N-C=O), 141.9 (C), 133.9 (C), 132.3 (2CH), 130.8 (CH), 129.0 (2CH), 126.6 (CH), 126.2 (C), 124.6 (CH), 123.9 (CF<sub>3</sub>, q, *J* = 277 Hz), 122.2 (C), 109.7 (CH), 88.1 (CH), 77.1 (C), 44.5 (CH<sub>2</sub>, q, *J* = 34 Hz), 43.9 (CH<sub>2</sub>), 40.3 (CH<sub>2</sub>); <sup>19</sup>F NMR (376MHz, CDCl<sub>3</sub>)  $\delta$  -70.78; HRMS (ESI) *m/z*: 494.9960 [M + Na]<sup>+</sup>, calcd for C<sub>19</sub>H<sub>16</sub>O<sub>2</sub>N<sub>2</sub>BrF<sub>3</sub>NaS; Found 494.99513.

**(3R,4'R)-4'-hydroxy-1-(4-methylbenzyl)-3'-(2,2,2-trifluoroethyl)-5-(trifluoromethoxy)spiro[indoline-3,2'-thiazolidin]-2-one (4s):**

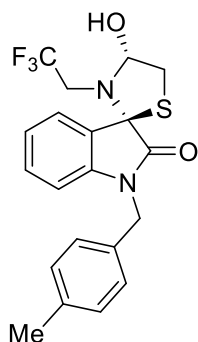

Prepared by following general procedure **C** purified by column chromatography using hexane and isolated product **4s** in 72% yield as a pale yellow solid with M. P. 118 - 123 °C.; The enantiomeric excess (ee) was determined by chiral stationary phase HPLC using a Phenomenex cellulose-5 column (hexane/EtOAc = 85:15, flow rate 0.5 mL/min,  $\lambda = 254$  nm),  $t_R = 11.040$  min (minor),  $t_R = 13.563$  min (major),  $[\alpha]_D^{25} = -43.348$  (CHCl<sub>3</sub>, c = 1.06 g/100mL, CHCl<sub>3</sub> for 86% ee); IR (neat)  $\nu_{\max}$  1681, 1612, 1276, 1138, 1107, and 752 cm<sup>-1</sup>; <sup>1</sup>H NMR (400 MHz, CDCl<sub>3</sub>)  $\delta$  7.48 (1H, d,  $J = 7.4$  Hz), 7.26 – 7.22 (1H, m), 7.18 – 7.10 (5H, m), 6.71 (1H, d,  $J = 7.8$  Hz), 5.64 (1H, d,  $J = 12$  Hz), 5.48 (1H, dd,  $J = 4.9, 11.9$  Hz), 4.84 (2H, q,  $J = 18.2$  Hz), 3.83 – 3.72 (2H, m), 3.39 (1H, d,  $J = 10.5$  Hz), 2.48 – 2.37 (1H, m), 2.31 (3H, s); <sup>13</sup>C NMR (100 MHz, CDCl<sub>3</sub>, DEPT-135)  $\delta$  178.1 (C, N-C=O), 142.3 (C), 137.9 (C), 131.8 (C), 130.7 (CH), 129.7 (2CH), 127.3 (2CH), 126.4 (CH), 126.2 (C), 124.4 (CF<sub>3</sub>, q,  $J = 277$  Hz), 124.4 (CH), 109.9 (CH), 88.1 (CH), 77.0 (C), 44.4 (CH<sub>2</sub>, q,  $J = 34$  Hz), 44.3 (CH<sub>2</sub>), 40.3 (CH<sub>2</sub>), 21.1 (CH<sub>3</sub>); <sup>19</sup>F NMR (376MHz, CDCl<sub>3</sub>)  $\delta$  -70.84; HRMS (ESI) m/z: 431.10115 [M + Na]<sup>+</sup>, calcd for C<sub>20</sub>H<sub>19</sub>O<sub>2</sub>N<sub>2</sub>F<sub>3</sub>NaS; Found 431.09830.

**(3R,4'R)-4'-hydroxy-3'-(2,2,2-trifluoroethyl)-1-tritylspiro[indoline-3,2'-thiazolidin]-2-one (4t):**

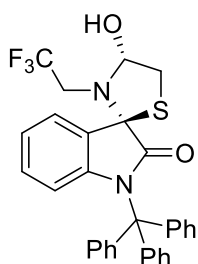

Prepared by following general procedure **C** purified by column chromatography using hexane and isolated product **4t** in 39% yield as a yellow semi solid. The enantiomeric excess (ee) was determined by chiral stationary phase HPLC using a Phenomenex cellulose-5 column (hexane/EtOAc = 85:15, flow rate 0.5 mL/min,  $\lambda = 254$  nm),  $t_R = 9.080$  min (minor),  $t_R = 13.494$  min (major),  $[\alpha]_D^{25} = -4.047$  (CHCl<sub>3</sub>, c = 0.96 g/100mL, CHCl<sub>3</sub> for 59% ee); IR (neat)  $\nu_{\max}$  3348, 2924, 1705, 1458, 1149, 1111, and 748 cm<sup>-1</sup>; <sup>1</sup>H NMR (400 MHz, CDCl<sub>3</sub>)  $\delta$  7.47 – 7.41 (8H, m), 7.29 – 7.27 (3H, m), 7.25 – 7.19 (5H, m), 7.03 (1H, t,  $J = 7.5$  Hz), 6.96 (1H, t,  $J = 7.9$  Hz), 6.22 (1H, d,  $J = 8.0$  Hz), 5.38 (1H, dd,  $J = 4.3, 11.7$  Hz), 5.28 (1H, d,  $J = 11.7$  Hz), 3.72 (1H, dd,  $J = 4.6, 10.5$  Hz), 3.39 – 3.28 (2H, m), 1.80 – 1.69 (1H, m); <sup>13</sup>C NMR (100 MHz, CDCl<sub>3</sub>, DEPT-135)  $\delta$  179.9 (C, N-C=O), 143.1 (C), 141.6 (C), 129.4 (CH), 129.3 (CH), 128.8 (6CH), 127.9 (6CH), 127.5 (3C), 127.2 (3CH), 125.8 (CH), 124.2 (CF<sub>3</sub>, q,  $J = 277$  Hz), 123.9 (CH), 116.1 (CH), 87.6 (CH), 76.9 (C), 43.9 (CH<sub>2</sub>, q,  $J = 33$  Hz), 44.5 (CH<sub>2</sub>); <sup>19</sup>F NMR (376MHz, CDCl<sub>3</sub>)  $\delta$  -70.92; HRMS (ESI) m/z: 569.1481 [M + Na]<sup>+</sup>, calcd for C<sub>31</sub>H<sub>25</sub>O<sub>2</sub>N<sub>2</sub>F<sub>3</sub>NaS; Found 569.14981.

**(3R,4'R)-1-allyl-4'-hydroxy-3'-(2,2,2-trifluoroethyl)spiro[indoline-3,2'-thiazolidin]-2-one (4u):**

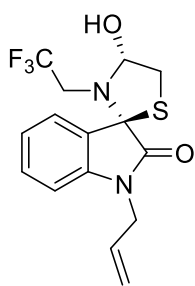

Prepared by following general procedure **C** purified by column chromatography using hexane and isolated product **4u** in 87% yield as a yellow semi solid. The enantiomeric excess (*ee*) was determined by chiral stationary phase HPLC using a Phenomenex cellulose-5 column (hexane/EtOAc = 85:15, flow rate 0.5 mL/min,  $\lambda$  = 254 nm),  $t_R$  = 11.102 min (minor),  $t_R$  = 12.056 min (major),  $[\alpha]_D^{25}$  = -80.574 (CHCl<sub>3</sub>, **c** = 0.71 g/100mL, CHCl<sub>3</sub> for 63% ee); IR (neat)  $\nu_{max}$  3332, 2924, 1697, 1612, 1149, and 756 cm<sup>-1</sup>; <sup>1</sup>H NMR (400 MHz, CDCl<sub>3</sub>)  $\delta$  7.49 (1H, d, *J* = 7.5 Hz), 7.33 (1H, d, *J* = 7.8 Hz), 7.16 (1H, t, *J* = 7.5 Hz), 6.84 (1H, d, *J* = 7.8 Hz), 5.87 – 5.78 (1H, m), 5.56 (1H, d, *J* = 12.0 Hz), 5.47 (1H, dd, *J* = 4.5, 12.0 Hz), 5.28 – 5.21 (2H, m), 4.34 – 4.30 (2H, m), 3.80 – 3.70 (2H, m), 3.37 (1H, d, *J* = 10.5 Hz), 2.48 – 2.37 (1H, m); <sup>13</sup>C NMR (100 MHz, CDCl<sub>3</sub>, DEPT-135)  $\delta$  177.7 (C, N-C=O), 142.3 (C), 130.7 (CH), 130.4 (CH), 126.5 (CH), 126.2 (C), 124.4 (CH), 124.4 (CF<sub>3</sub>, q, *J* = 276 Hz), 118.4 (CH<sub>2</sub>), 109.8 (CH), 88.1 (CH), 77.1 (C), 44.5 (CH<sub>2</sub>, q, *J* = 34 Hz), 42.9 (CH<sub>2</sub>), 40.3 (CH<sub>2</sub>); <sup>19</sup>F NMR (376MHz, CDCl<sub>3</sub>)  $\delta$  -70.84; HRMS (ESI) *m/z*: 367.0698 [M + Na]<sup>+</sup>, calcd for C<sub>15</sub>H<sub>15</sub>O<sub>2</sub>N<sub>2</sub>F<sub>3</sub>NaS; Found 367.0697.

**(3R,4'R)-4'-hydroxy-1-(prop-2-yn-1-yl)-3'-(2,2,2-trifluoroethyl)spiro[indoline-3,2'-thiazolidin]-2-one (4v):**

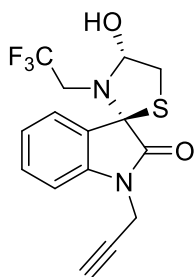

Prepared by following general procedure **C** purified by column chromatography using hexane and isolated product **4v** in 83% yield as a yellow semi solid. The enantiomeric excess (*ee*) was determined by chiral stationary phase HPLC using a Phenomenex cellulose-5 column (hexane/EtOAc = 90:10, flow rate 0.5 mL/min,  $\lambda$  = 254 nm),  $t_R$  = 16.024 min (minor),  $t_R$  = 19.021 min (major),  $[\alpha]_D^{25}$  = -38.680 (CHCl<sub>3</sub>, **c** = 0.69 g/100mL, CHCl<sub>3</sub> for 89% ee); IR (neat)  $\nu_{max}$  3294, 2924, 1705, 1612, 1342, 1149, and 756 cm<sup>-1</sup>; <sup>1</sup>H NMR (400 MHz, CDCl<sub>3</sub>)  $\delta$  7.51 (1H, d, *J* = 7.6 Hz), 7.39 (1H, d, *J* = 7.6 Hz), 7.21 (1H, t, *J* = 8.4 Hz), 7.05 (1H, d, *J* = 7.6 Hz), 5.46 (2H, dd, *J* = 12, 12 Hz), 4.55 (1H, d, *J* = 15.2 Hz), 4.43 (1H, d, *J* = 15.2 Hz), 3.78 – 3.71 (2H, m), 3.35 (1H, d, *J* = 10.8 Hz), 2.25 – 2.41 (1H, m), 2.29 (1H, t, *J* = 2.4 Hz); <sup>13</sup>C NMR (100 MHz, CDCl<sub>3</sub>, DEPT-135)  $\delta$  177.3 (C, N-C=O), 141.3 (C), 130.8 (C), 126.6 (CH), 126.2 (C), 124.8 (CH), 124.3 (CF<sub>3</sub>, q, *J* = 277 Hz), 109.9 (CH), 88.1 (CH), 76.9 (C), 75.9 (CH), 73.3 (CH), 44.4 (CH<sub>2</sub>, q, *J* = 34 Hz), 40.3 (CH<sub>2</sub>), 30.0 (CH<sub>2</sub>); <sup>19</sup>F NMR (376MHz, CDCl<sub>3</sub>)  $\delta$  -70.89; HRMS (ESI) *m/z*: 365.05420 [M + Na]<sup>+</sup>, calcd for C<sub>15</sub>H<sub>13</sub>O<sub>2</sub>N<sub>2</sub>F<sub>3</sub>NaS; Found 365.05363.

**(3R,4'R)-4'-hydroxy-1-phenyl-3'-(2,2,2-trifluoroethyl)spiro[indoline-3,2'-thiazolidin]-2-one (4w):**

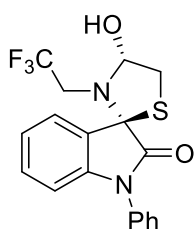

Prepared by following general procedure **C** purified by column chromatography using hexane and isolated product **4w** in 67% yield as a colourless semi solid. The enantiomeric excess (*ee*) was determined by chiral stationary phase HPLC using a Phenomenex cellulose-5 column (hexane/EtOAc = 90:10, flow rate 0.5 mL/min,  $\lambda$  = 254 nm),  $t_R$  = 18.229 min (major),  $t_R$  = 22.141 min (minor),  $[\alpha]_D^{25}$  = -69.230 (CHCl<sub>3</sub>,

**c = 1.14 g/100mL, CHCl<sub>3</sub> for 93% ee**; IR (neat)  $\nu_{\max}$  3363, 1705, 1273, 1141, 1080 and 748 cm<sup>-1</sup>; <sup>1</sup>H NMR (400 MHz, CDCl<sub>3</sub>)  $\delta$  7.57 – 7.53 (3H, m), 7.48 – 7.43 (1H, m), 7.41 – 7.38 (2H, m), 7.30 (1H, t, *J* = 7.7 Hz), 7.21 (1H, t, *J* = 7.5 Hz), 6.81 (1H, d, *J* = 7.9 Hz), 5.51 (1H, dd, *J* = 4.5, 12.1 Hz), 5.42 (1H, d, *J* = 12.1 Hz), 3.89 – 3.78 (2H, m), 3.39 (1H, d, *J* = 10.6 Hz), 2.67 – 2.57 (1H, m); <sup>13</sup>C NMR (100 MHz, CDCl<sub>3</sub>, DEPT-135)  $\delta$  177.6 (C, N-C=O), 143.3 (C), 133.4 (C), 130.8(CH), 129.9 (2CH), 128.9 (CH), 126.9 (CH), 126.2 (2CH), 126.0 (C), 124.8 (CH), 124.4 (CF<sub>3</sub>, q, *J* = 277 Hz), 110.3 (CH), 88.2 (CH), 77.3 (C), 44.6 (CH<sub>2</sub>, q, *J* = 33 Hz), 40.3 (CH<sub>2</sub>); <sup>19</sup>F NMR (376MHz, CDCl<sub>3</sub>)  $\delta$  -70.75; HRMS (ESI) *m/z*: 403.0698 [M + Na]<sup>+</sup>, calcd for C<sub>18</sub>H<sub>15</sub>O<sub>2</sub>N<sub>2</sub>F<sub>3</sub>NaS; Found 403.0703.

**(R)-1-methyl-3'-(2,2,2-trifluoroethyl)spiro[indoline-3,2'-thiazolidine]-2,4'-dione (5a):**

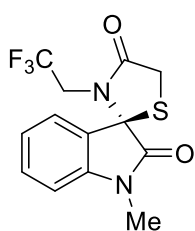

Prepared by following general procedure **D** purified by column chromatography using hexane and isolated product **5a** in 75% yield as a colourless semi solid. The enantiomeric excess (*ee*) was determined by chiral stationary phase HPLC using a Phenomenex cellulose-5 column (hexane/EtOAc = 85:15, flow rate 1 mL/min,  $\lambda$  = 254 nm), *t<sub>R</sub>* = 18.349 min (major), *t<sub>R</sub>* = 19.416 min (minor),  $[\alpha]_{\text{D}}^{25} = +3.474$  (CHCl<sub>3</sub>, **c** = 0.17 g/100mL, CHCl<sub>3</sub> for 92% ee); IR (neat)  $\nu_{\max}$  2924, 1728, 1612, 1465, 1373,

1157, and 756 cm<sup>-1</sup>; <sup>1</sup>H NMR (400 MHz, CDCl<sub>3</sub>)  $\delta$  7.46 (1H, t, *J* = 7.8 Hz), 7.38 (1H, d, *J* = 7.4 Hz), 7.19 (1H, q, *J* = 7.6 Hz), 6.91 (1H, d, *J* = 7.9 Hz), 4.31 (1H, d, *J* = 15.3 Hz), 3.96 – 3.86 (1H, m), 3.72 (1H, d, *J* = 15.3 Hz), 3.59 – 3.49 (1H, m), 3.21 (3H, s); <sup>13</sup>C NMR (100 MHz, CDCl<sub>3</sub>, DEPT-135)  $\delta$  174.2 (C=O), 173.2 (C, N-C=O), 144.1 (C), 132.1 (CH), 126.5 (CH), 123.8 (CH), 122.9 (CF<sub>3</sub>, q, *J* = 278 Hz), 122.2 (C), 109.4 (CH), 68.2 (C), 43.7 (CH<sub>2</sub>, q, *J* = 36 Hz), 32.3 (CH<sub>2</sub>), 26.6 (CH<sub>3</sub>); <sup>19</sup>F NMR (376MHz, CDCl<sub>3</sub>)  $\delta$  -69.02; HRMS (ESI) *m/z*: 33.03855 [M + Na]<sup>+</sup>, calcd for C<sub>13</sub>H<sub>11</sub>O<sub>2</sub>N<sub>2</sub>F<sub>3</sub>NaS; Found 339.03867.

**(1'S,3R)-1-methyl-3'-(2,2,2-trifluoroethyl)spiro[indoline-3,2'-thiazolidine]-2,4'-dione 1'-oxide (6a):**

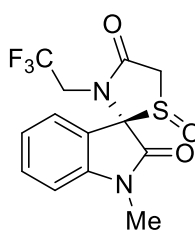

Prepared by following general procedure **E** purified by column chromatography using hexane and isolated product **6a** in 25% yield as a pale-yellow semi solid.

$[\alpha]_{\text{D}}^{25} = -84.667$  (CHCl<sub>3</sub>, **c** = 0.15 g/100mL, CHCl<sub>3</sub>); IR (neat)  $\nu_{\max}$  1720, 1612, 1473, 1373, 1265 and 750 cm<sup>-1</sup>; <sup>1</sup>H NMR (400 MHz, CDCl<sub>3</sub>)  $\delta$  7.56 (1H, t, *J* = 7.8 Hz), 7.36 (1H, d, *J* = 8.3 Hz), 7.20 – 7.23 (1H, m), 7.03 (1H, d, *J* = 7.9 Hz), 4.66 – 4.39 (1H, m), 4.41 (1H, d, *J* = 16.3 Hz), 3.69 (1H, d, *J* = 16.3 Hz), 3.36 – 3.29 (1H, m), 3.26

(3H, s); <sup>13</sup>C NMR (100 MHz, CDCl<sub>3</sub>, DEPT-135)  $\delta$  170.6 (C, N-C=O), 168.9 (C, N-C=O), 144.2 (C), 132.9 (CH), 127.4 (CH), 124.5 (CH), 123.0 (CF<sub>3</sub>, q, *J* = 278 Hz), 115.8 (C), 109.9 (CH), 83.8 (C), 53.2 (CH<sub>2</sub>), 43.3 (CH<sub>2</sub>, q, *J* = 35 Hz), 26.9 (CH<sub>3</sub>); <sup>19</sup>F NMR (376MHz, CDCl<sub>3</sub>)  $\delta$  -70.09; HRMS (ESI) *m/z*: 355.03347 [M + Na]<sup>+</sup>, calcd for C<sub>13</sub>H<sub>11</sub>O<sub>3</sub>N<sub>2</sub>F<sub>3</sub>NaS; Found 355.03360.

## Crystal Structure of 4a

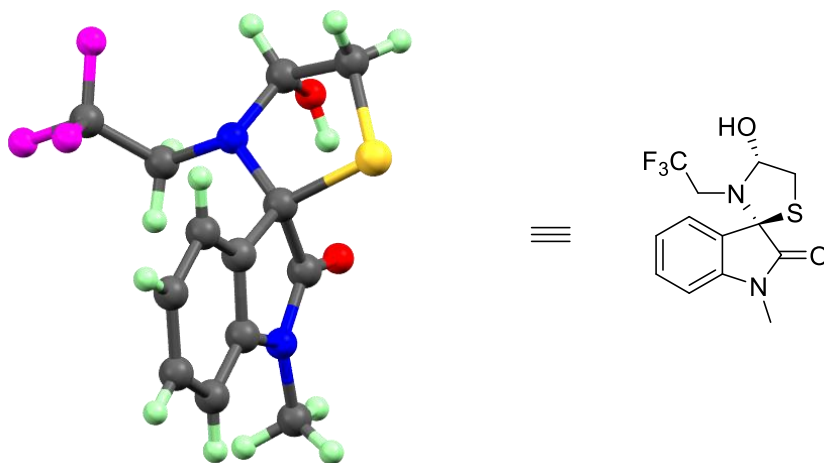

Table 1. Crystal data and structure refinement for sbii4.

|                                 |                                                                                |                    |
|---------------------------------|--------------------------------------------------------------------------------|--------------------|
| Identification code             | SB-II-4                                                                        |                    |
| Empirical formula               | C <sub>13</sub> H <sub>13</sub> F <sub>3</sub> N <sub>2</sub> O <sub>2</sub> S |                    |
| Formula weight                  | 318.31                                                                         |                    |
| Temperature                     | 298(2) K                                                                       |                    |
| Wavelength                      | 0.71073 Å                                                                      |                    |
| Crystal system                  | Monoclinic                                                                     |                    |
| Space group                     | P 21/c                                                                         |                    |
| Unit cell dimensions            | a = 10.2811(5) Å                                                               | α = 90°.           |
|                                 | b = 14.3963(6) Å                                                               | β = 116.7220(10)°. |
|                                 | c = 10.3695(4) Å                                                               | γ = 90°.           |
| Volume                          | 1370.87(10) Å <sup>3</sup>                                                     |                    |
| Z                               | 4                                                                              |                    |
| Density (calculated)            | 1.542 Mg/m <sup>3</sup>                                                        |                    |
| Absorption coefficient          | 0.277 mm <sup>-1</sup>                                                         |                    |
| F(000)                          | 656                                                                            |                    |
| Crystal size                    | 0.450 x 0.089 x 0.042 mm <sup>3</sup>                                          |                    |
| Theta range for data collection | 2.830 to 29.596°.                                                              |                    |
| Index ranges                    | -14 ≤ h ≤ 14, -19 ≤ k ≤ 20, -14 ≤ l ≤ 14                                       |                    |
| Reflections collected           | 54179                                                                          |                    |
| Independent reflections         | 3856 [R(int) = 0.0704]                                                         |                    |
| Completeness to theta = 25.242° | 99.8 %                                                                         |                    |
| Absorption correction           | Semi-empirical from equivalents                                                |                    |
| Max. and min. transmission      | 0.934 and 0.823                                                                |                    |

|                                   |                                             |
|-----------------------------------|---------------------------------------------|
| Refinement method                 | Full-matrix least-squares on F <sup>2</sup> |
| Data / restraints / parameters    | 3856 / 0 / 195                              |
| Goodness-of-fit on F <sup>2</sup> | 1.039                                       |
| Final R indices [I>2sigma(I)]     | R1 = 0.0460, wR2 = 0.1130                   |
| R indices (all data)              | R1 = 0.0605, wR2 = 0.1250                   |
| Extinction coefficient            | n/a                                         |
| Largest diff. peak and hole       | 0.427 and -0.290 e.Å <sup>-3</sup>          |

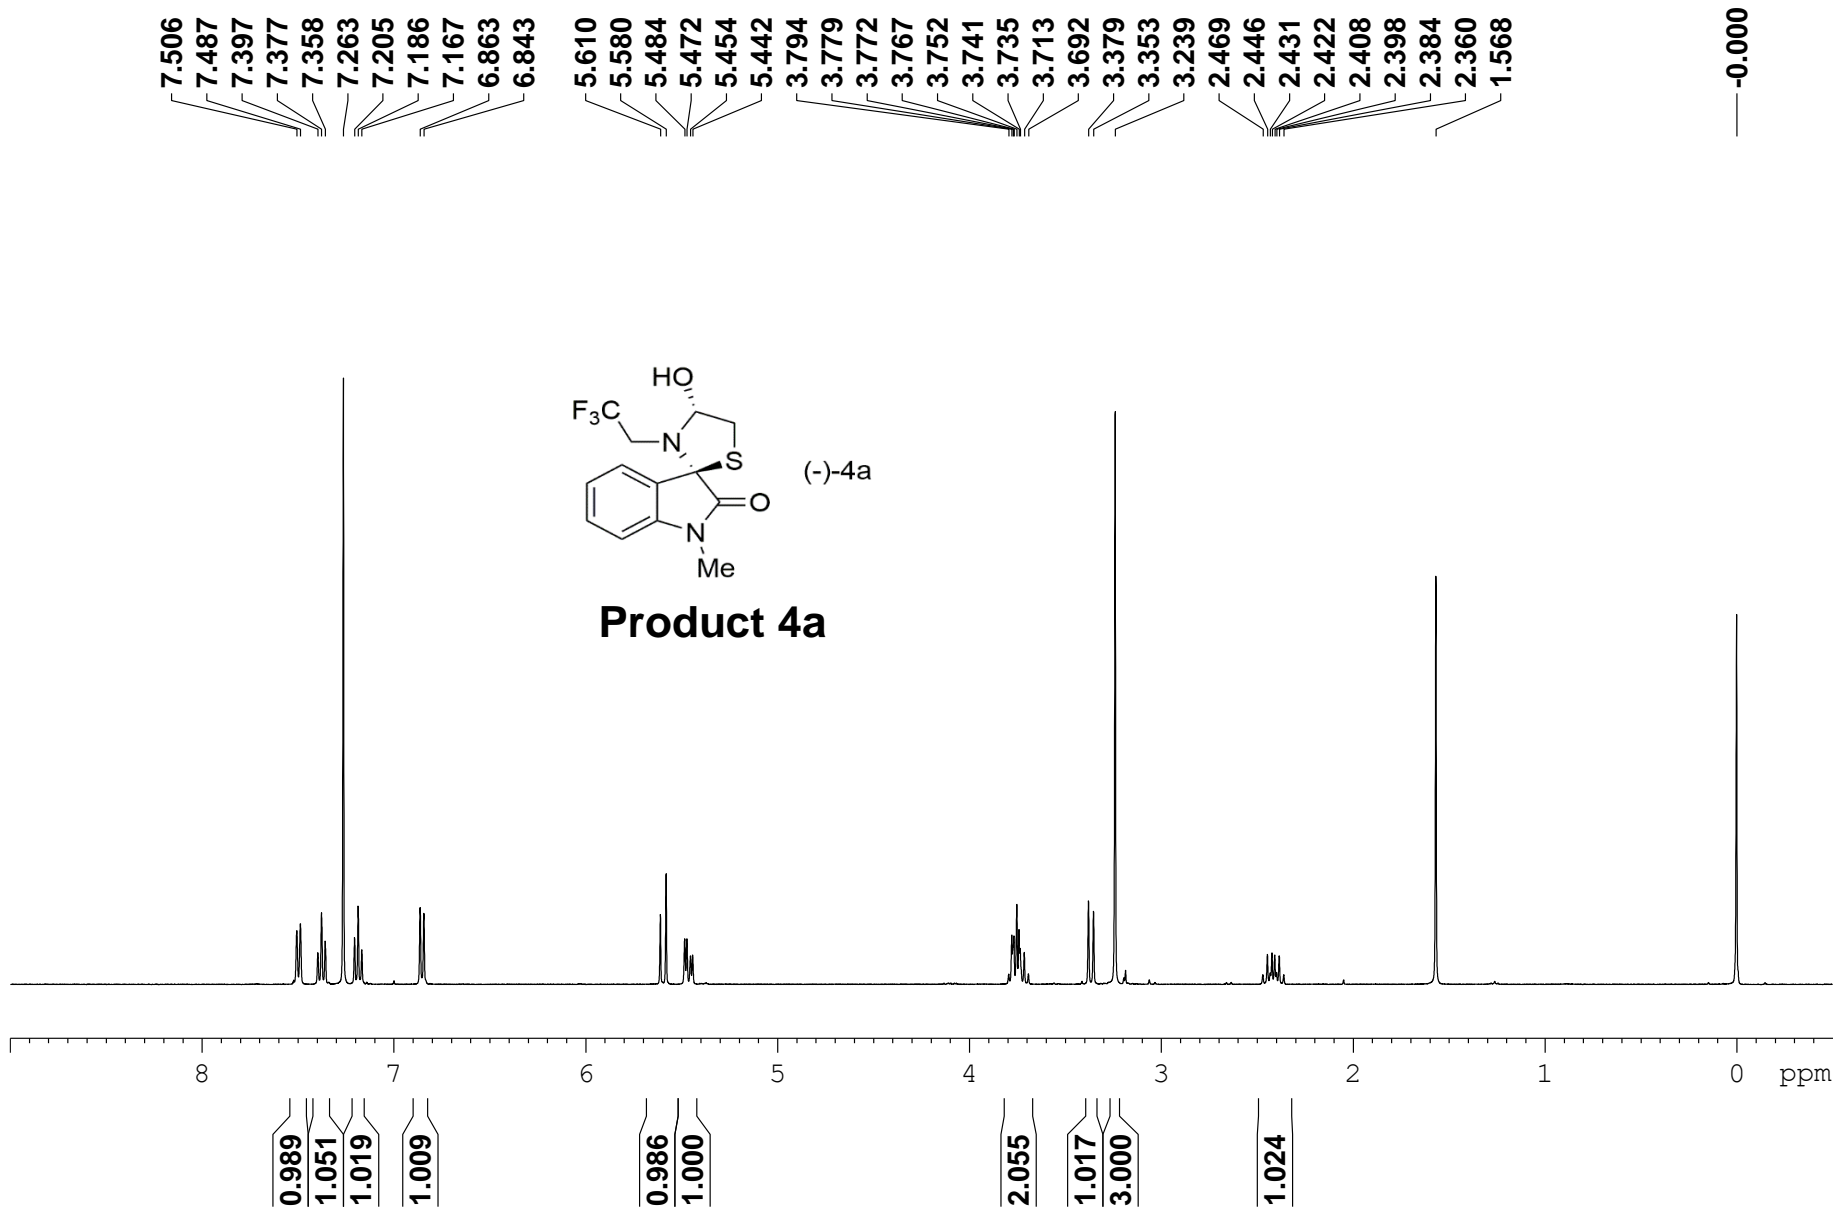



— 177.87

143.12  
130.80  
128.54  
126.44  
126.31  
125.77  
124.44  
123.00  
120.24  
108.91

88.11  
88.10  
77.33  
77.21  
77.12  
77.01  
76.69

45.00  
44.66  
44.33  
44.00  
40.32

— 26.92

— -0.00

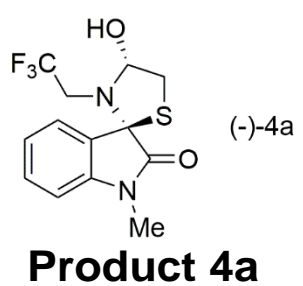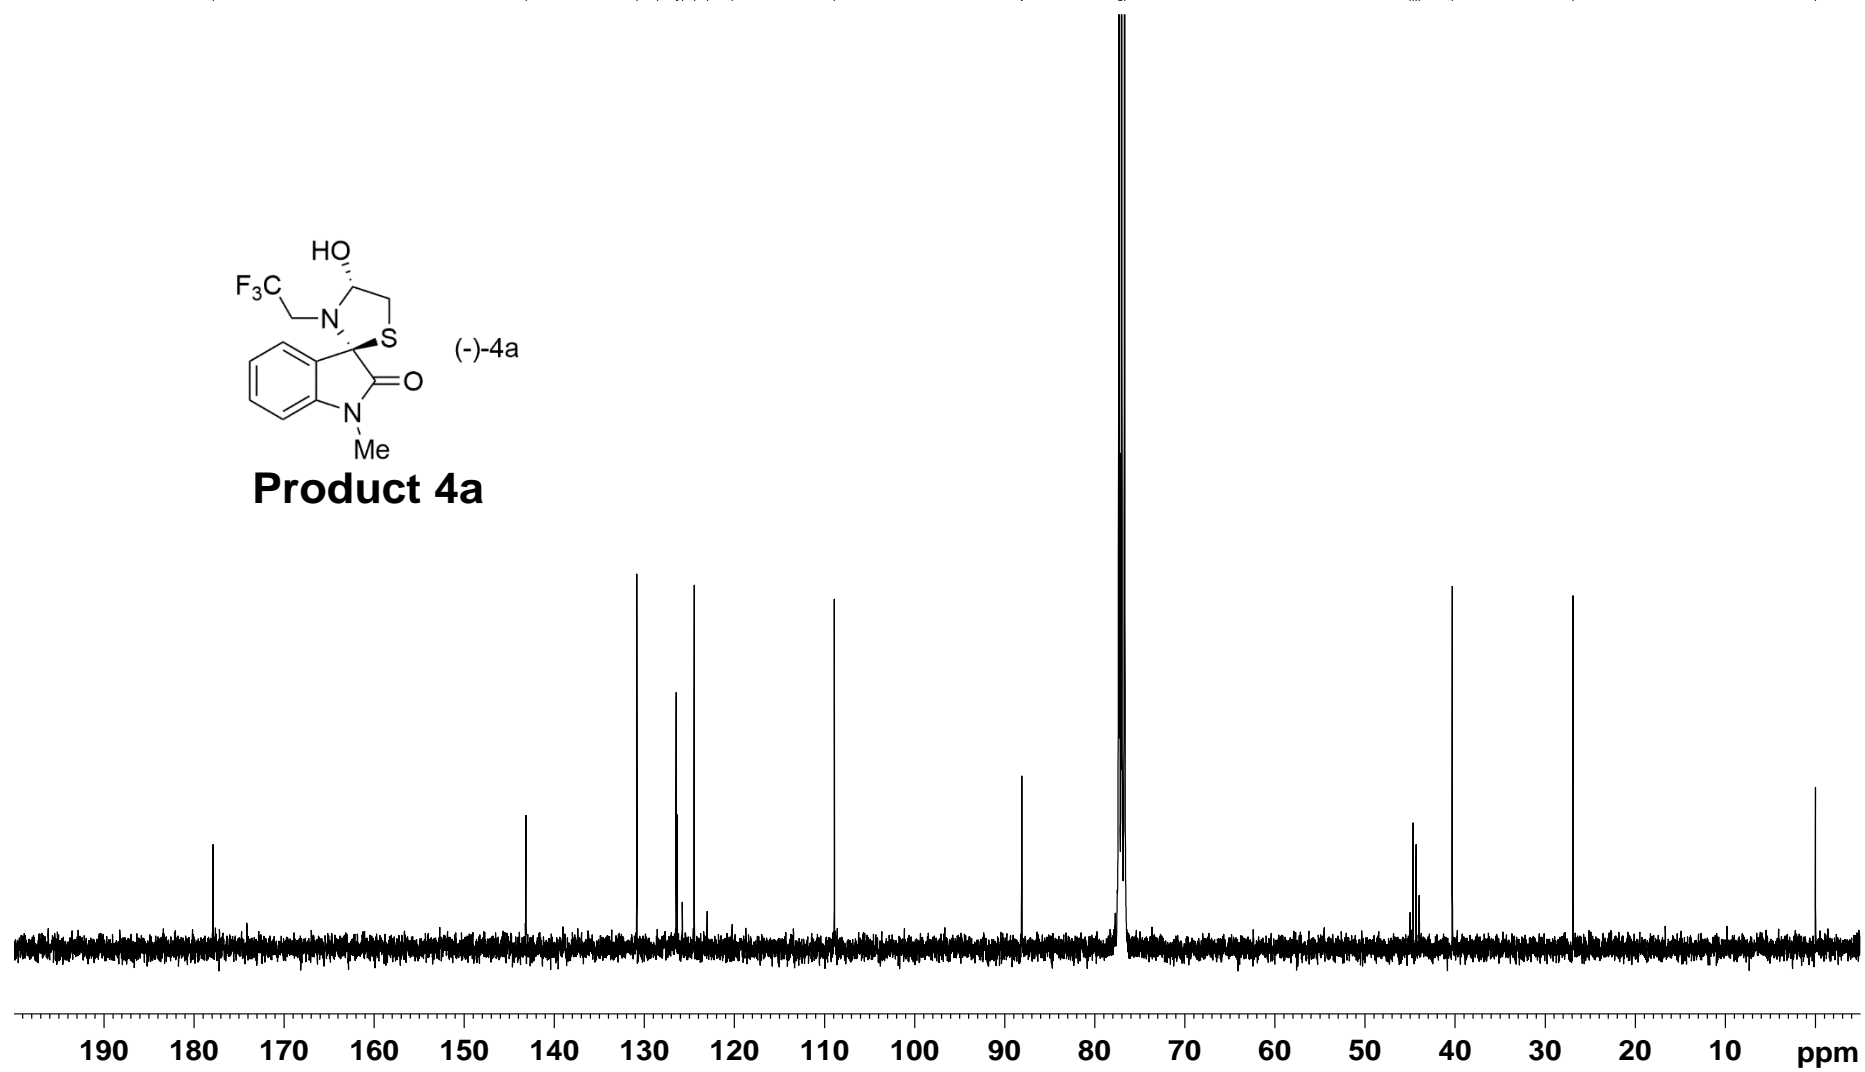

— -70.91

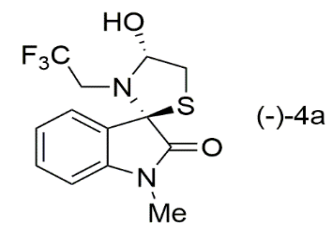

**Product 4a**

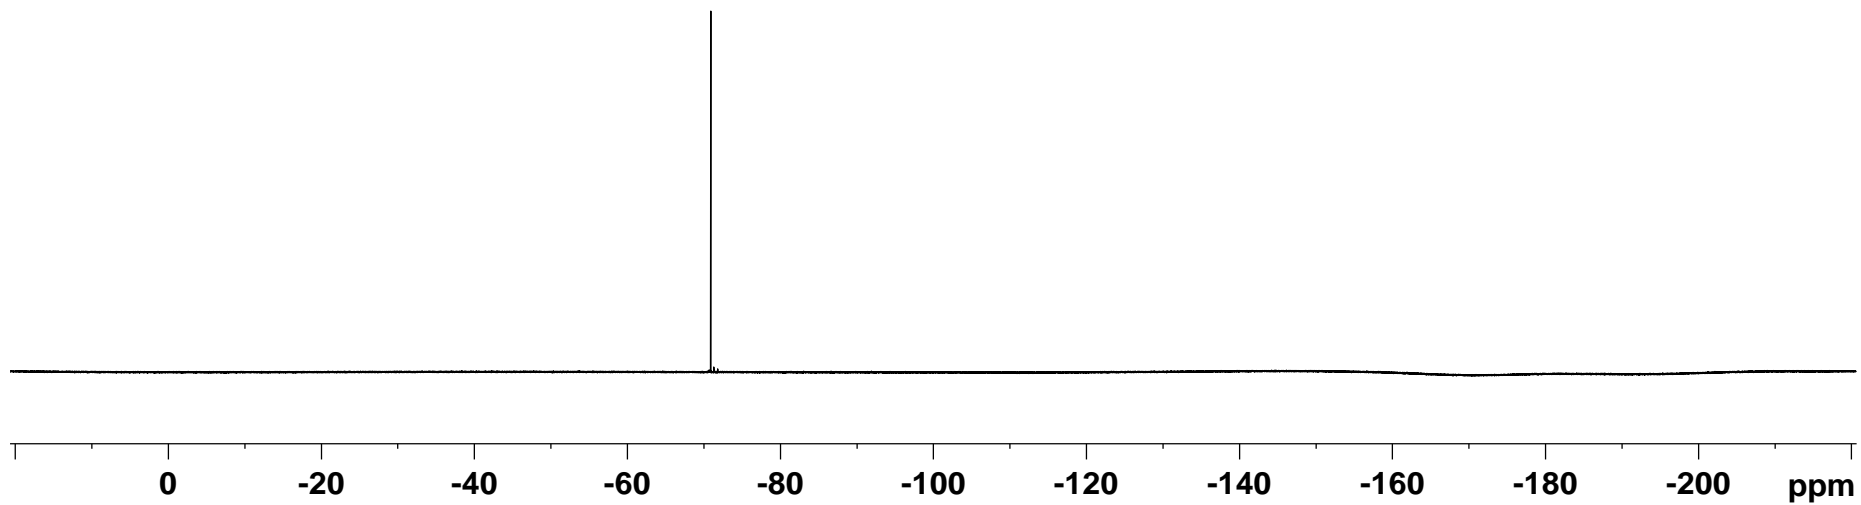

7.265  
7.249  
7.243  
7.231  
7.224  
7.105  
7.098  
7.083  
7.077  
7.061  
7.055  
6.807  
6.797  
6.786  
6.776  
5.531  
5.501  
5.465  
5.454  
5.435  
5.424  
3.811  
3.790  
3.780  
3.770  
3.759  
3.752  
3.744  
3.733  
3.708  
3.376  
3.350  
3.233  
2.457  
2.433  
2.418  
2.410  
2.395  
2.386  
2.372  
2.348  
1.628  
1.479  
1.287  
1.255  
1.216  
0.843  
-0.000

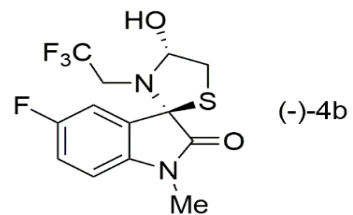

**Product 4b**

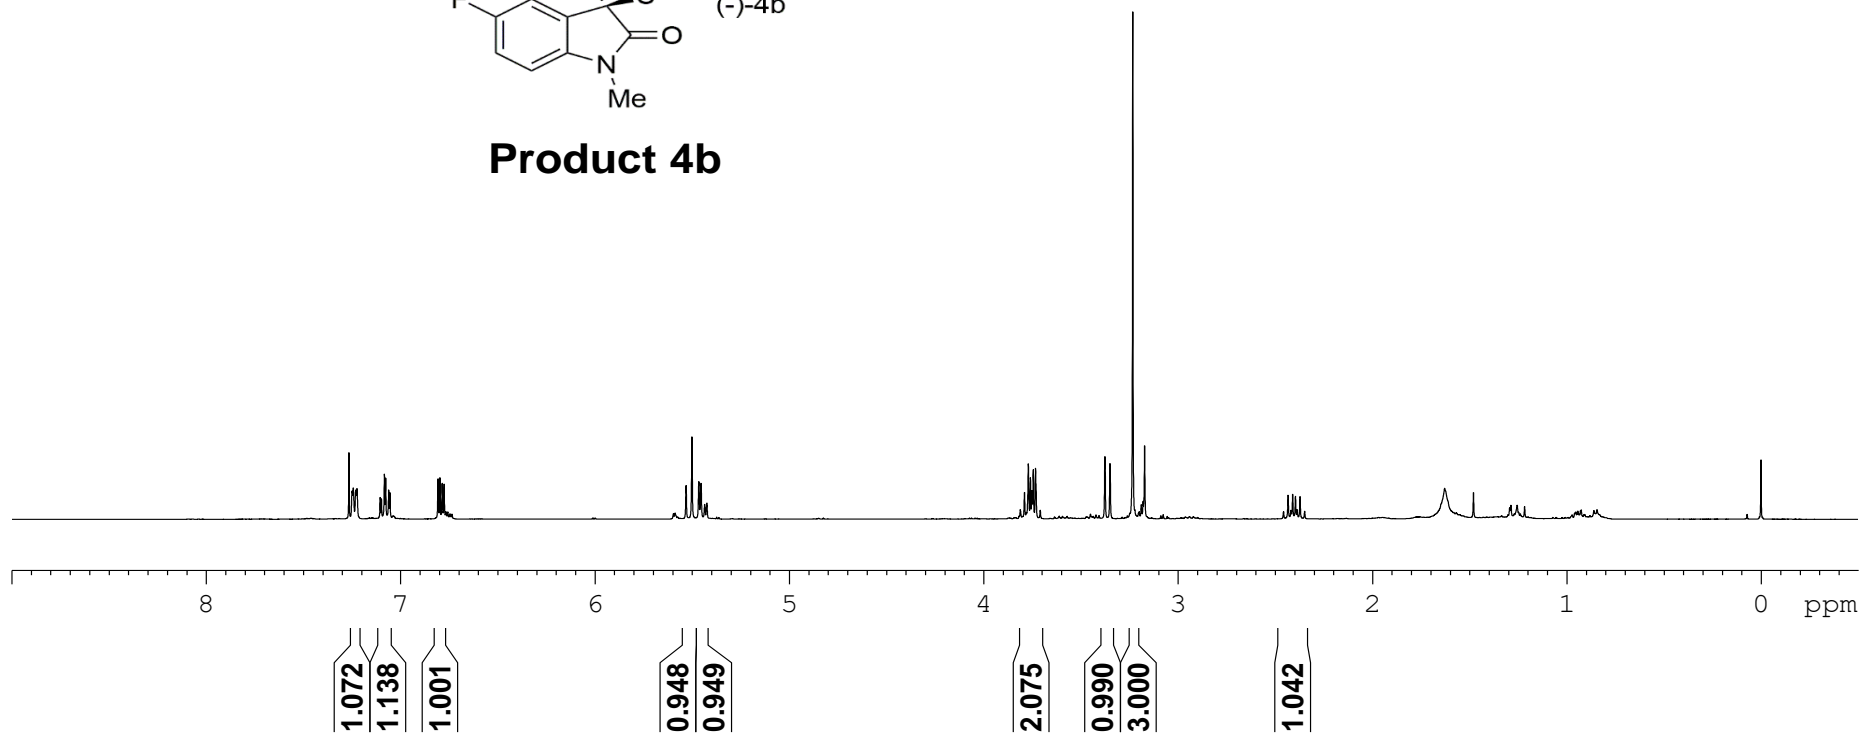

177.65  
161.39  
158.97  
138.95  
138.93  
128.46  
128.43  
128.39  
125.69  
122.93  
120.16  
117.52  
117.28  
114.42  
114.17  
109.76  
109.68  
88.29  
77.35  
77.23  
77.11  
77.03  
76.71  
45.17  
44.84  
44.50  
44.16  
40.43  
27.08

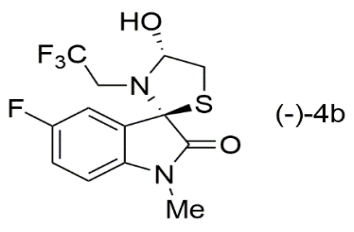

**Product 4b**

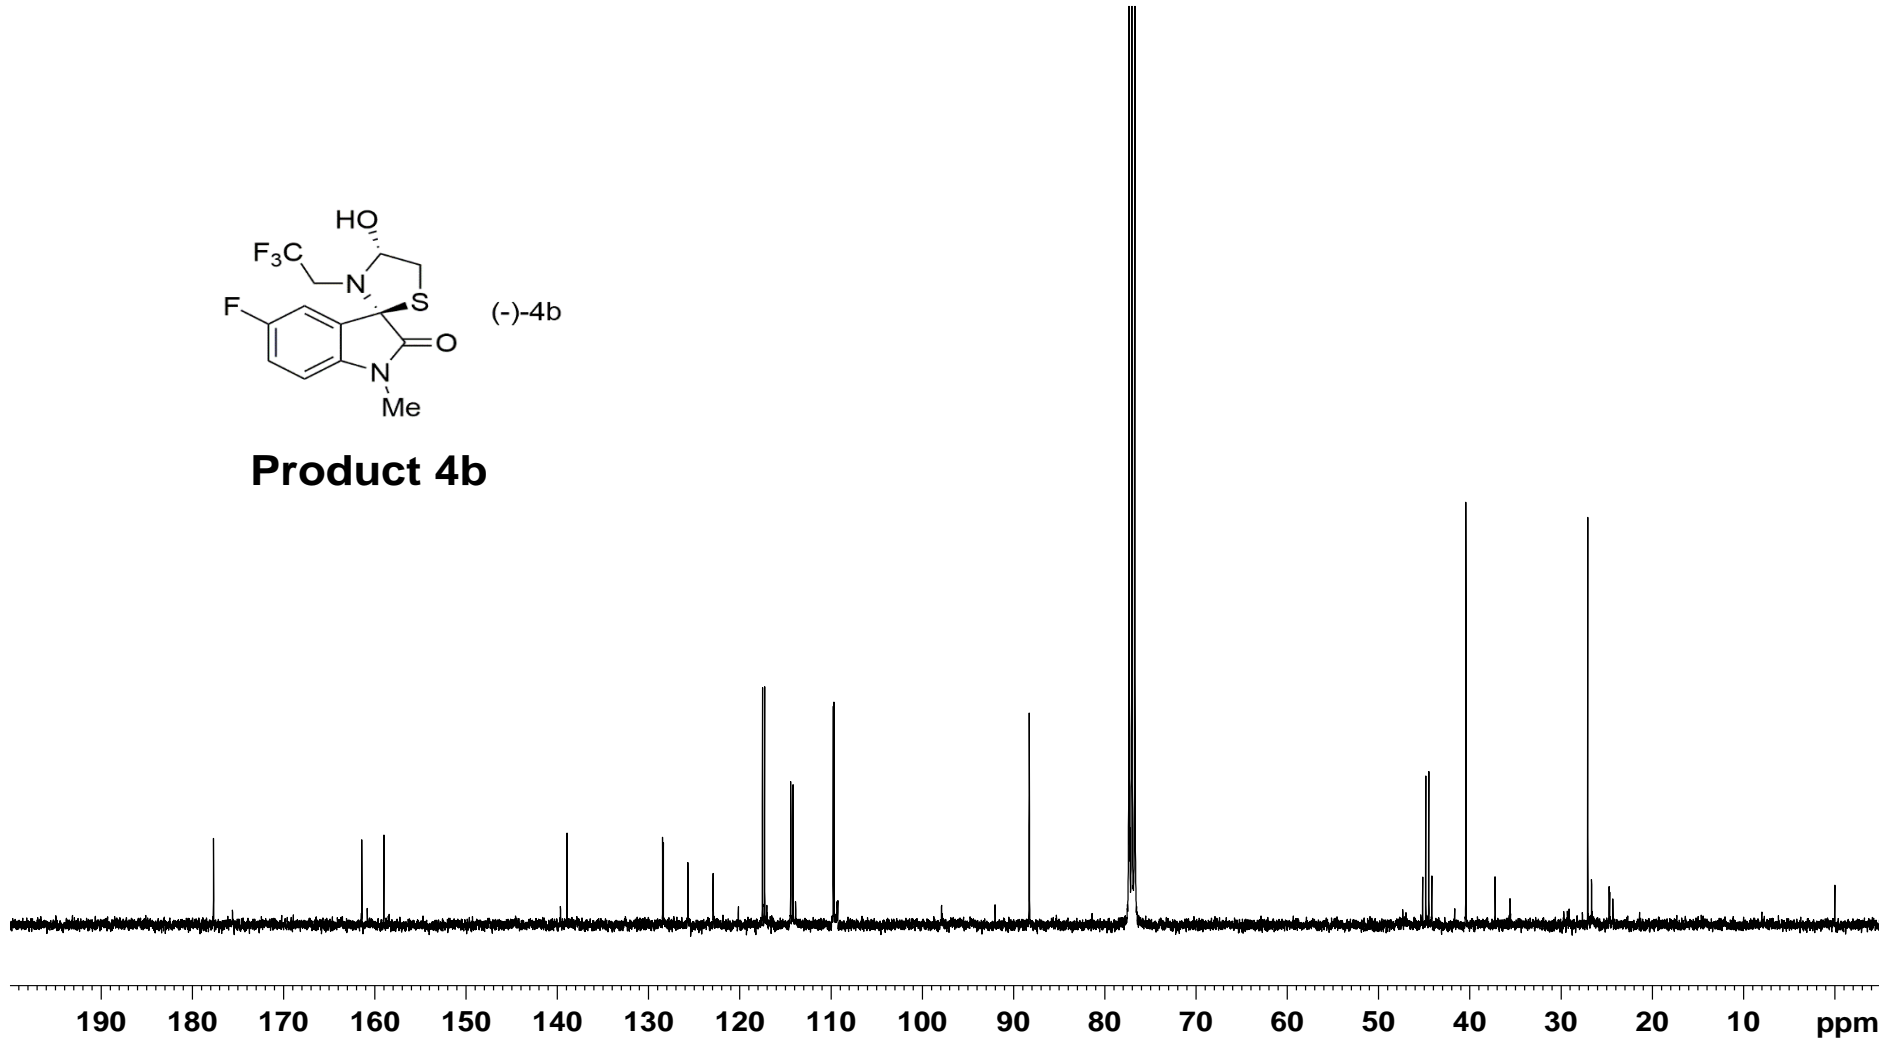

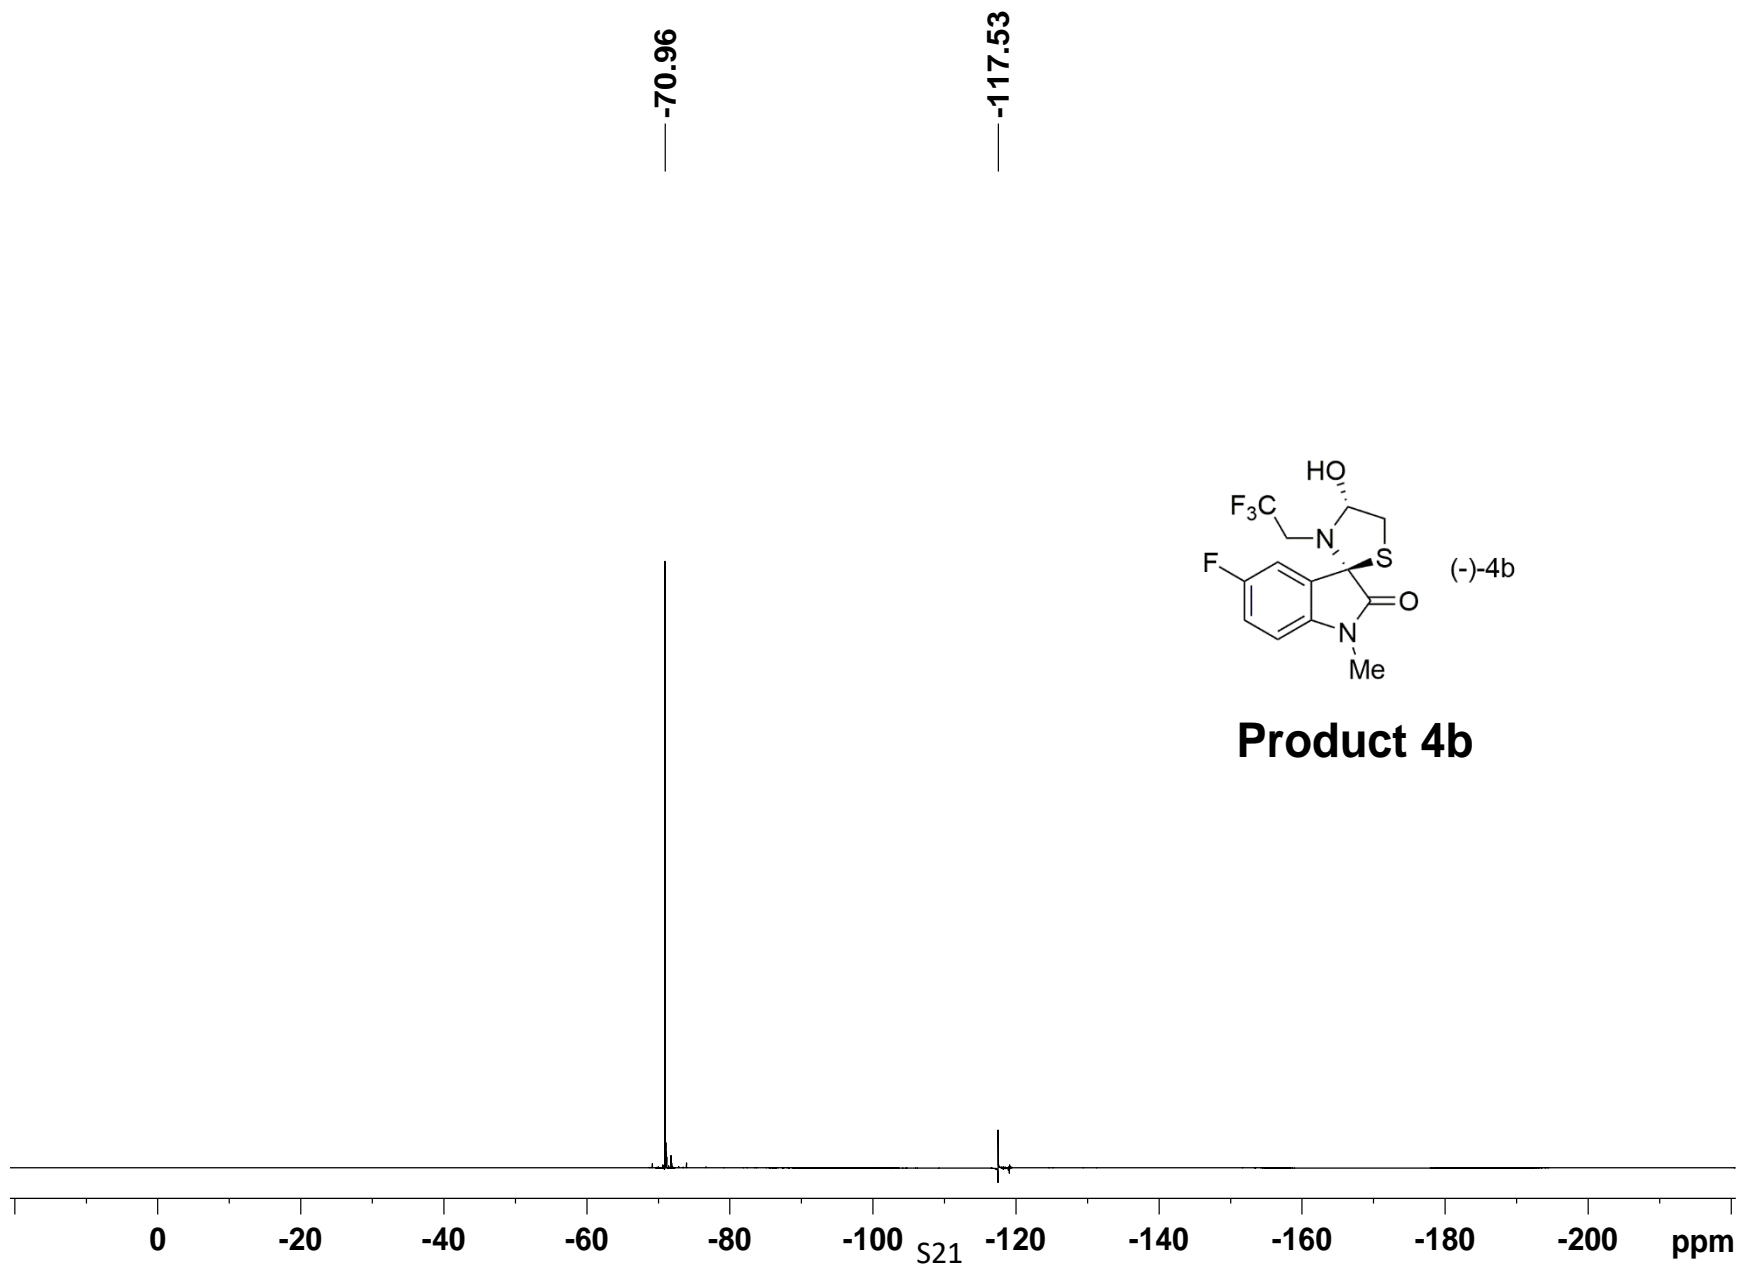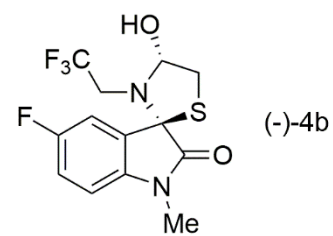

**Product 4b**

7.299  
7.280  
7.265  
7.141  
7.128  
7.120  
7.113  
7.106  
7.089  
7.066

5.455  
5.451

3.813  
3.791  
3.769  
3.753  
3.746  
3.741  
3.735  
3.710  
3.446  
3.439  
3.378  
3.352

2.488  
2.465  
2.450  
2.441  
2.427  
2.418  
2.403  
2.380  
1.609  
1.254  
0.843

0.000

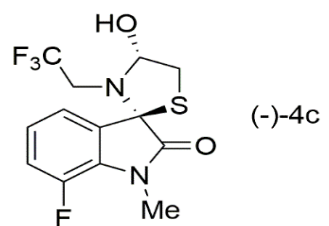

**Product 4c**

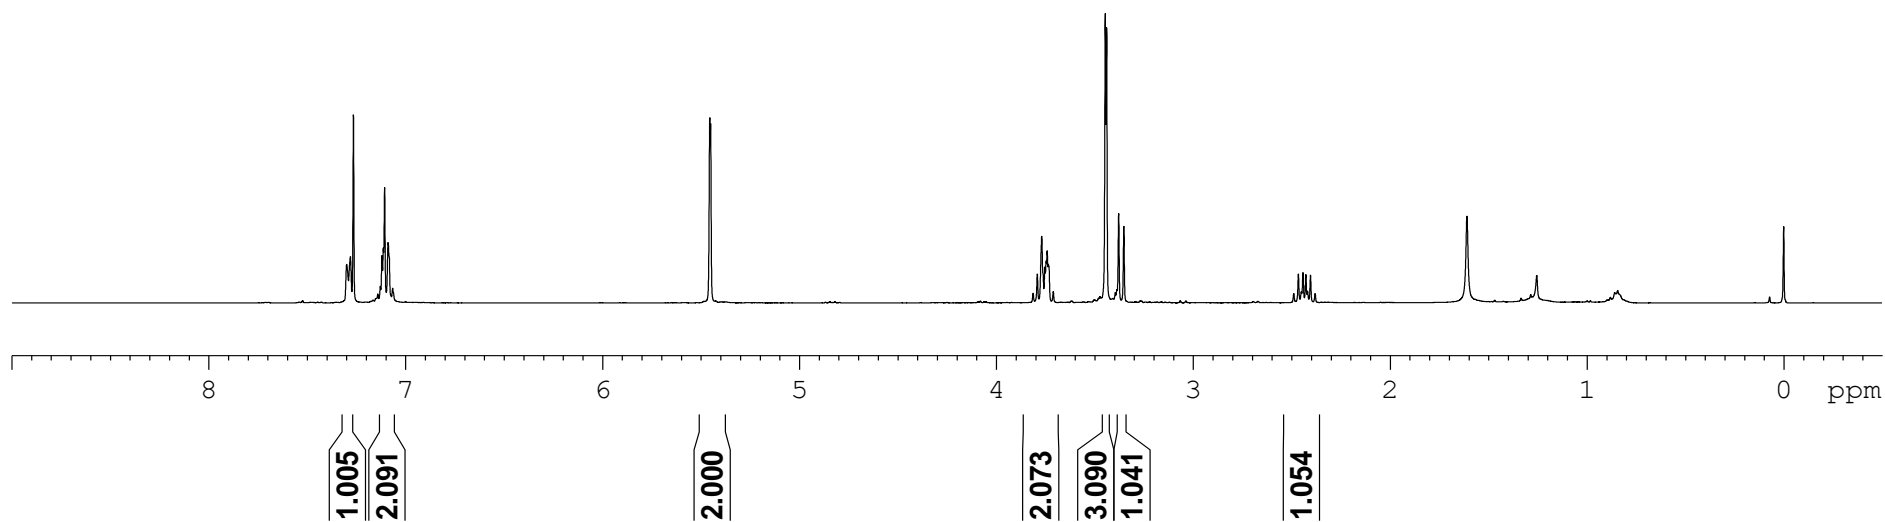

177.69

148.88  
146.44  
129.71  
129.62  
129.37  
129.35  
125.70  
125.01  
124.94  
122.93  
122.24  
122.21  
118.69  
118.50

88.24  
88.23  
77.35  
77.24  
77.03  
76.79  
76.72

45.15  
44.81  
44.47  
44.14  
40.43  
29.68  
29.63

0.01

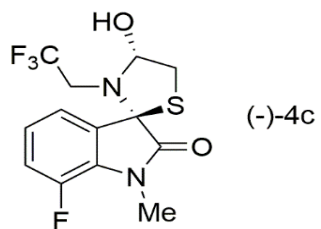

**Product 4c**

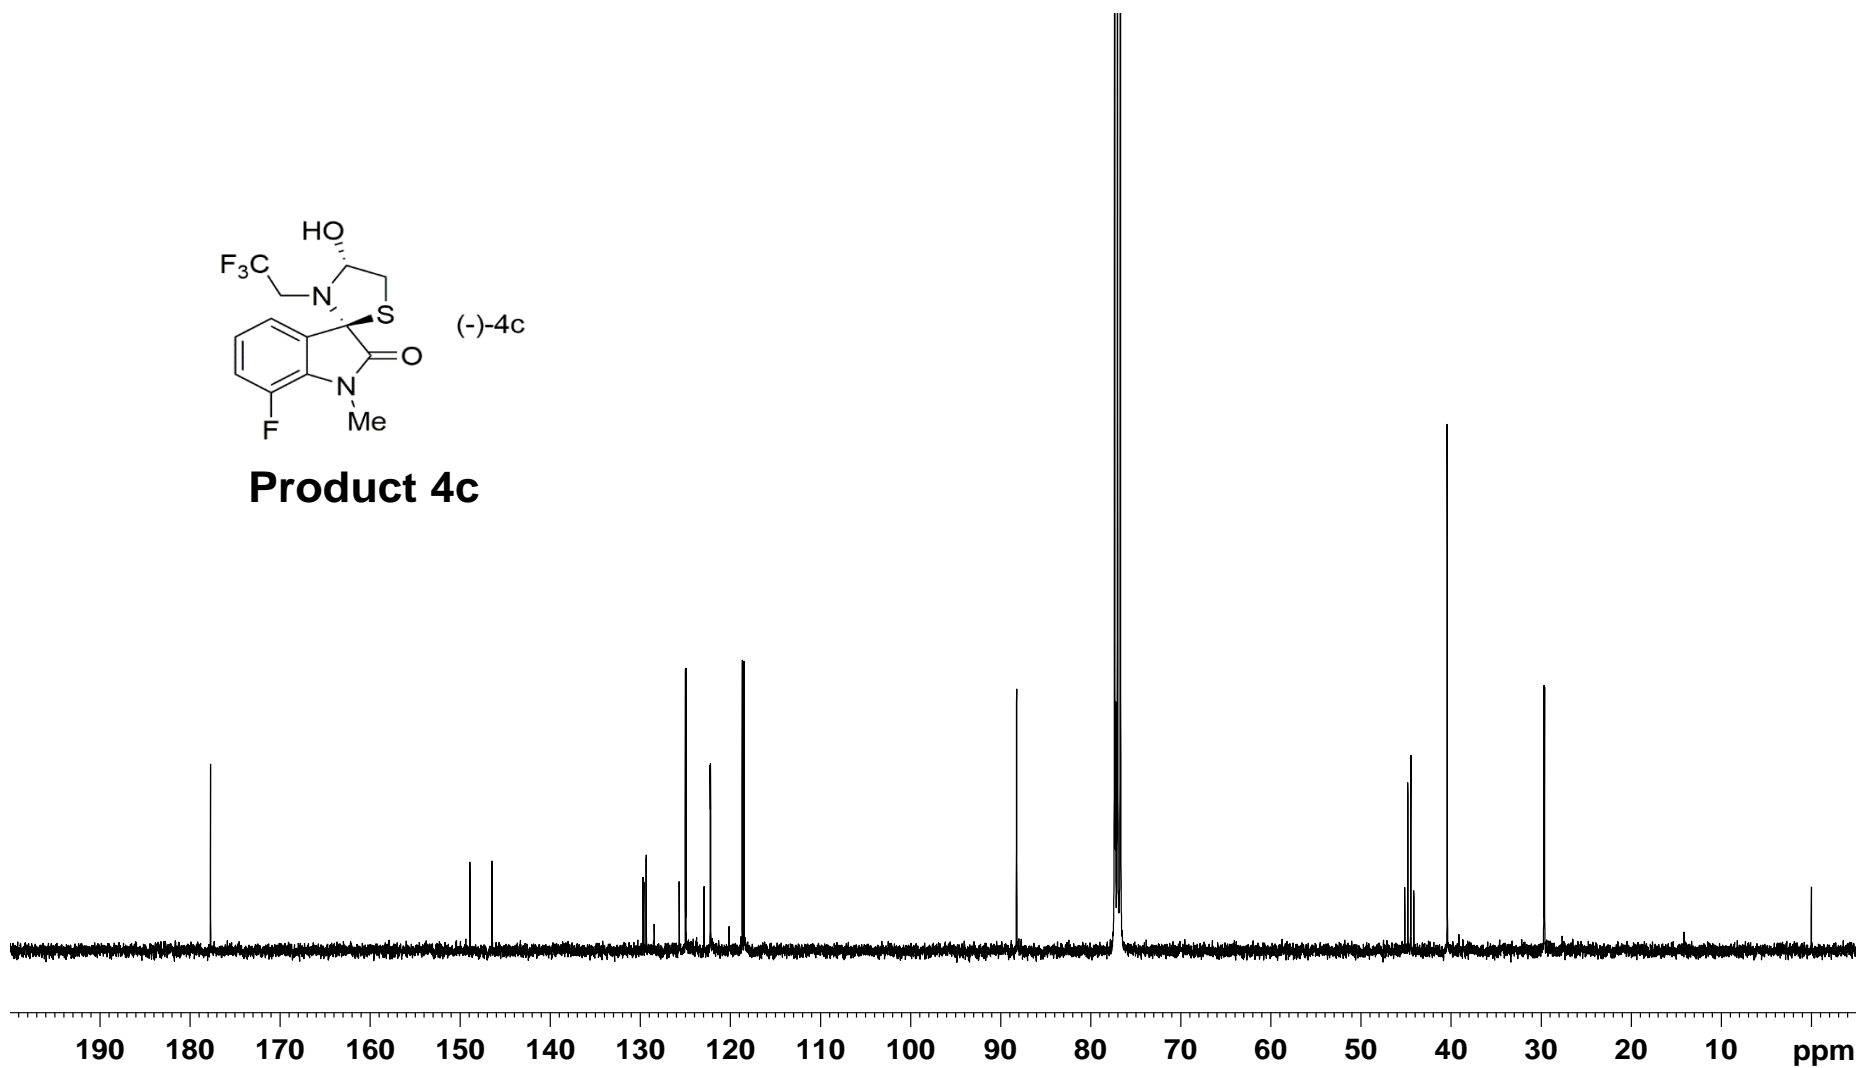

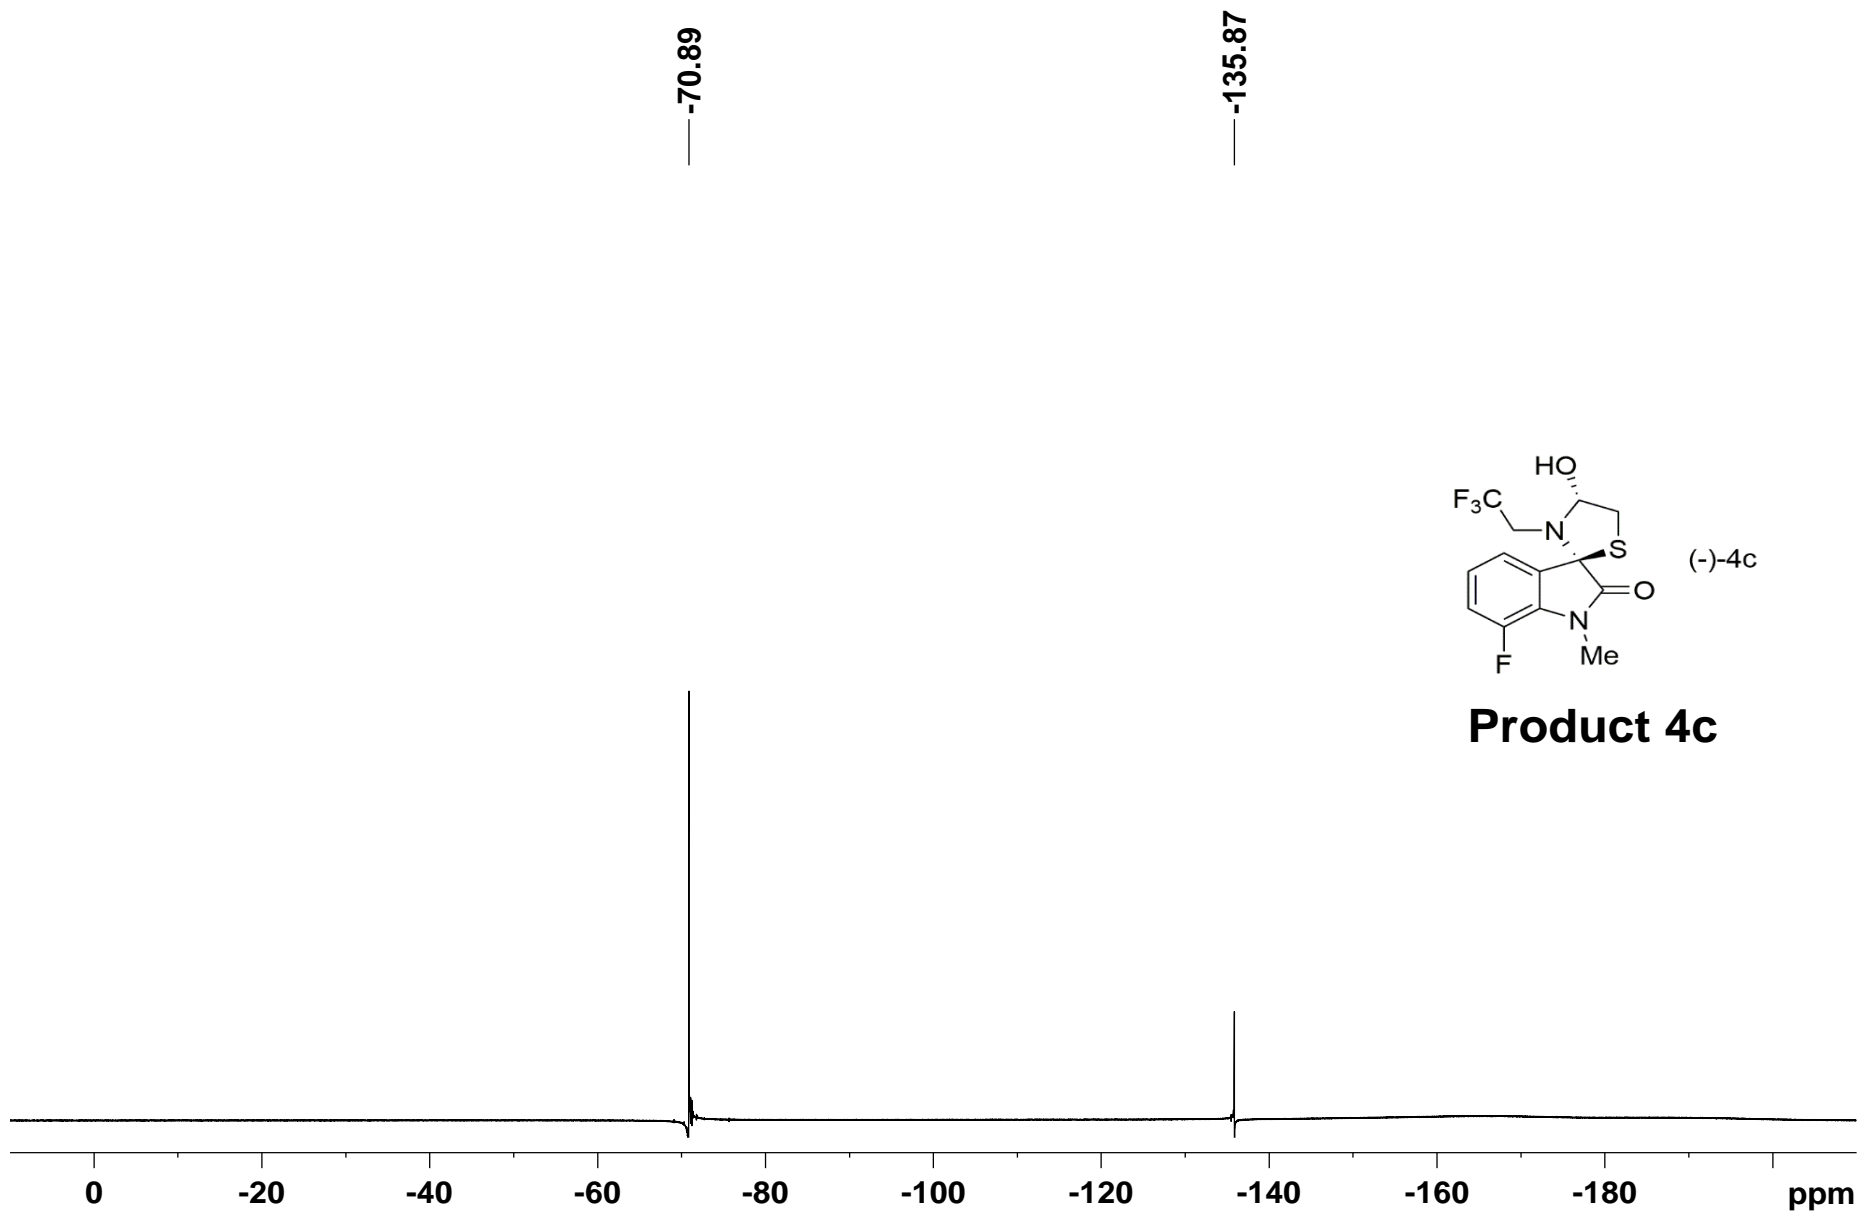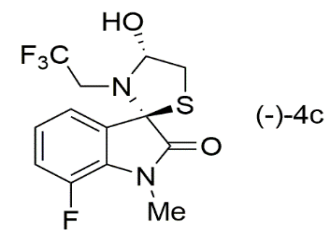

**Product 4c**



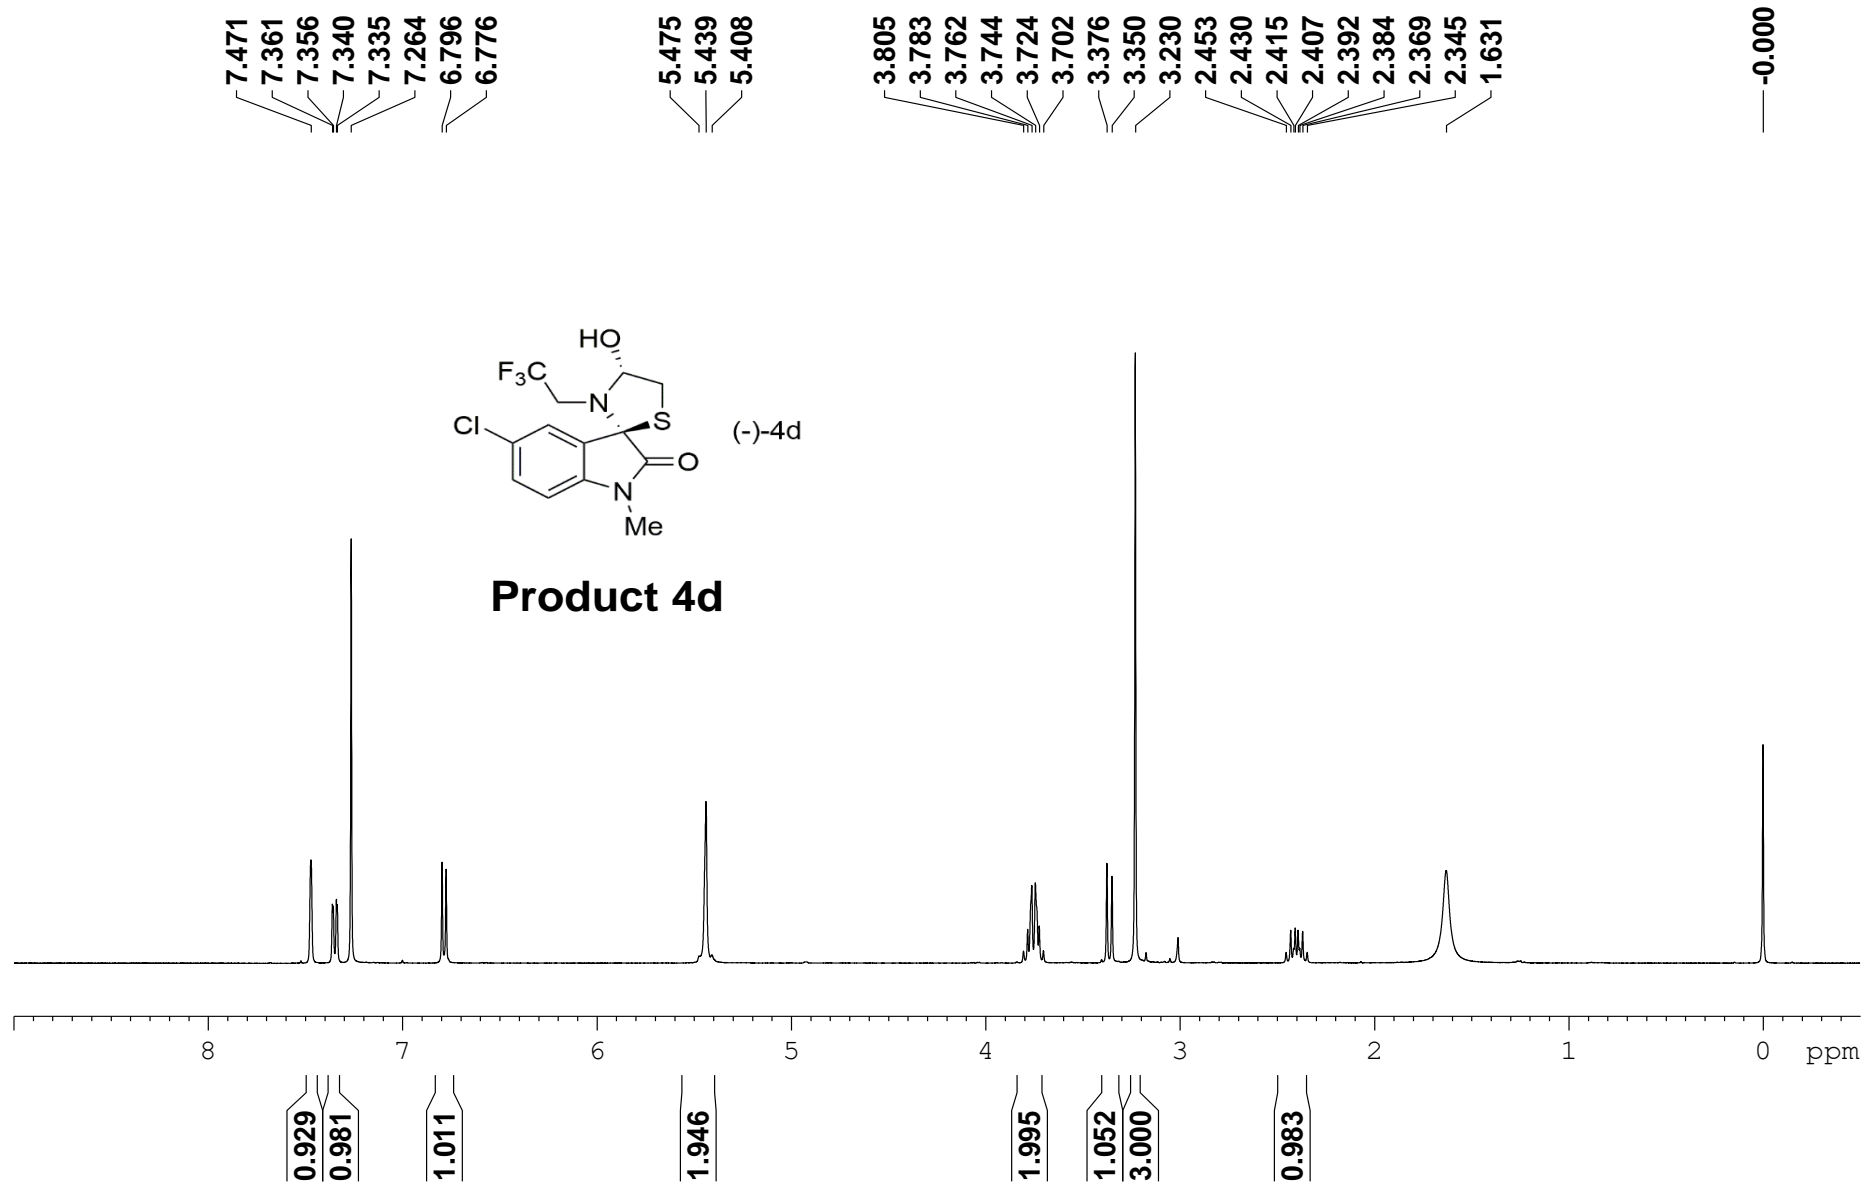

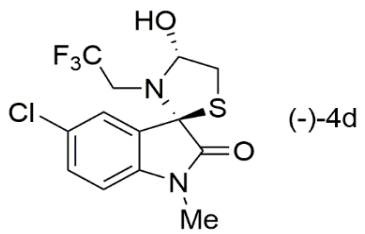

**Product 4d**

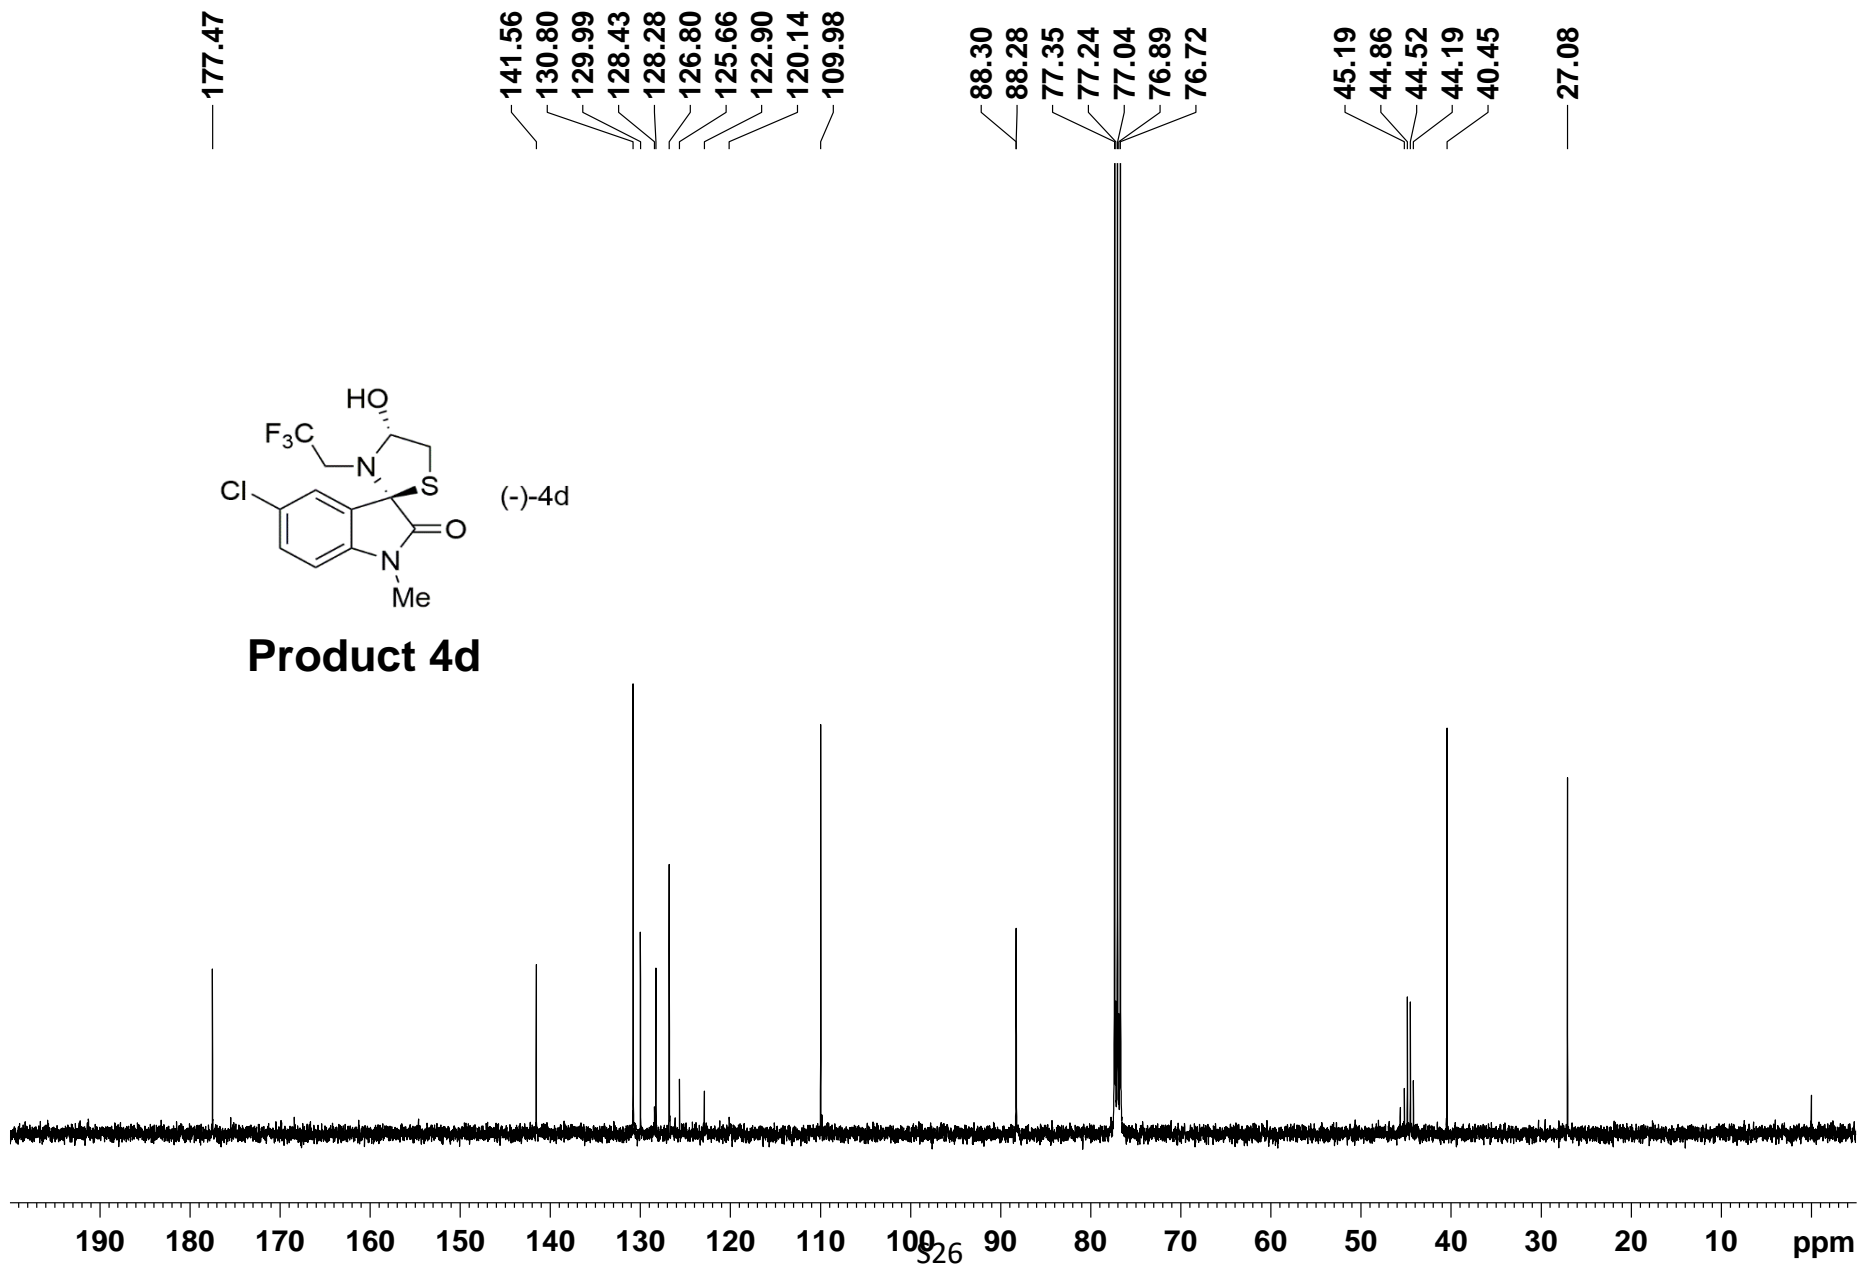

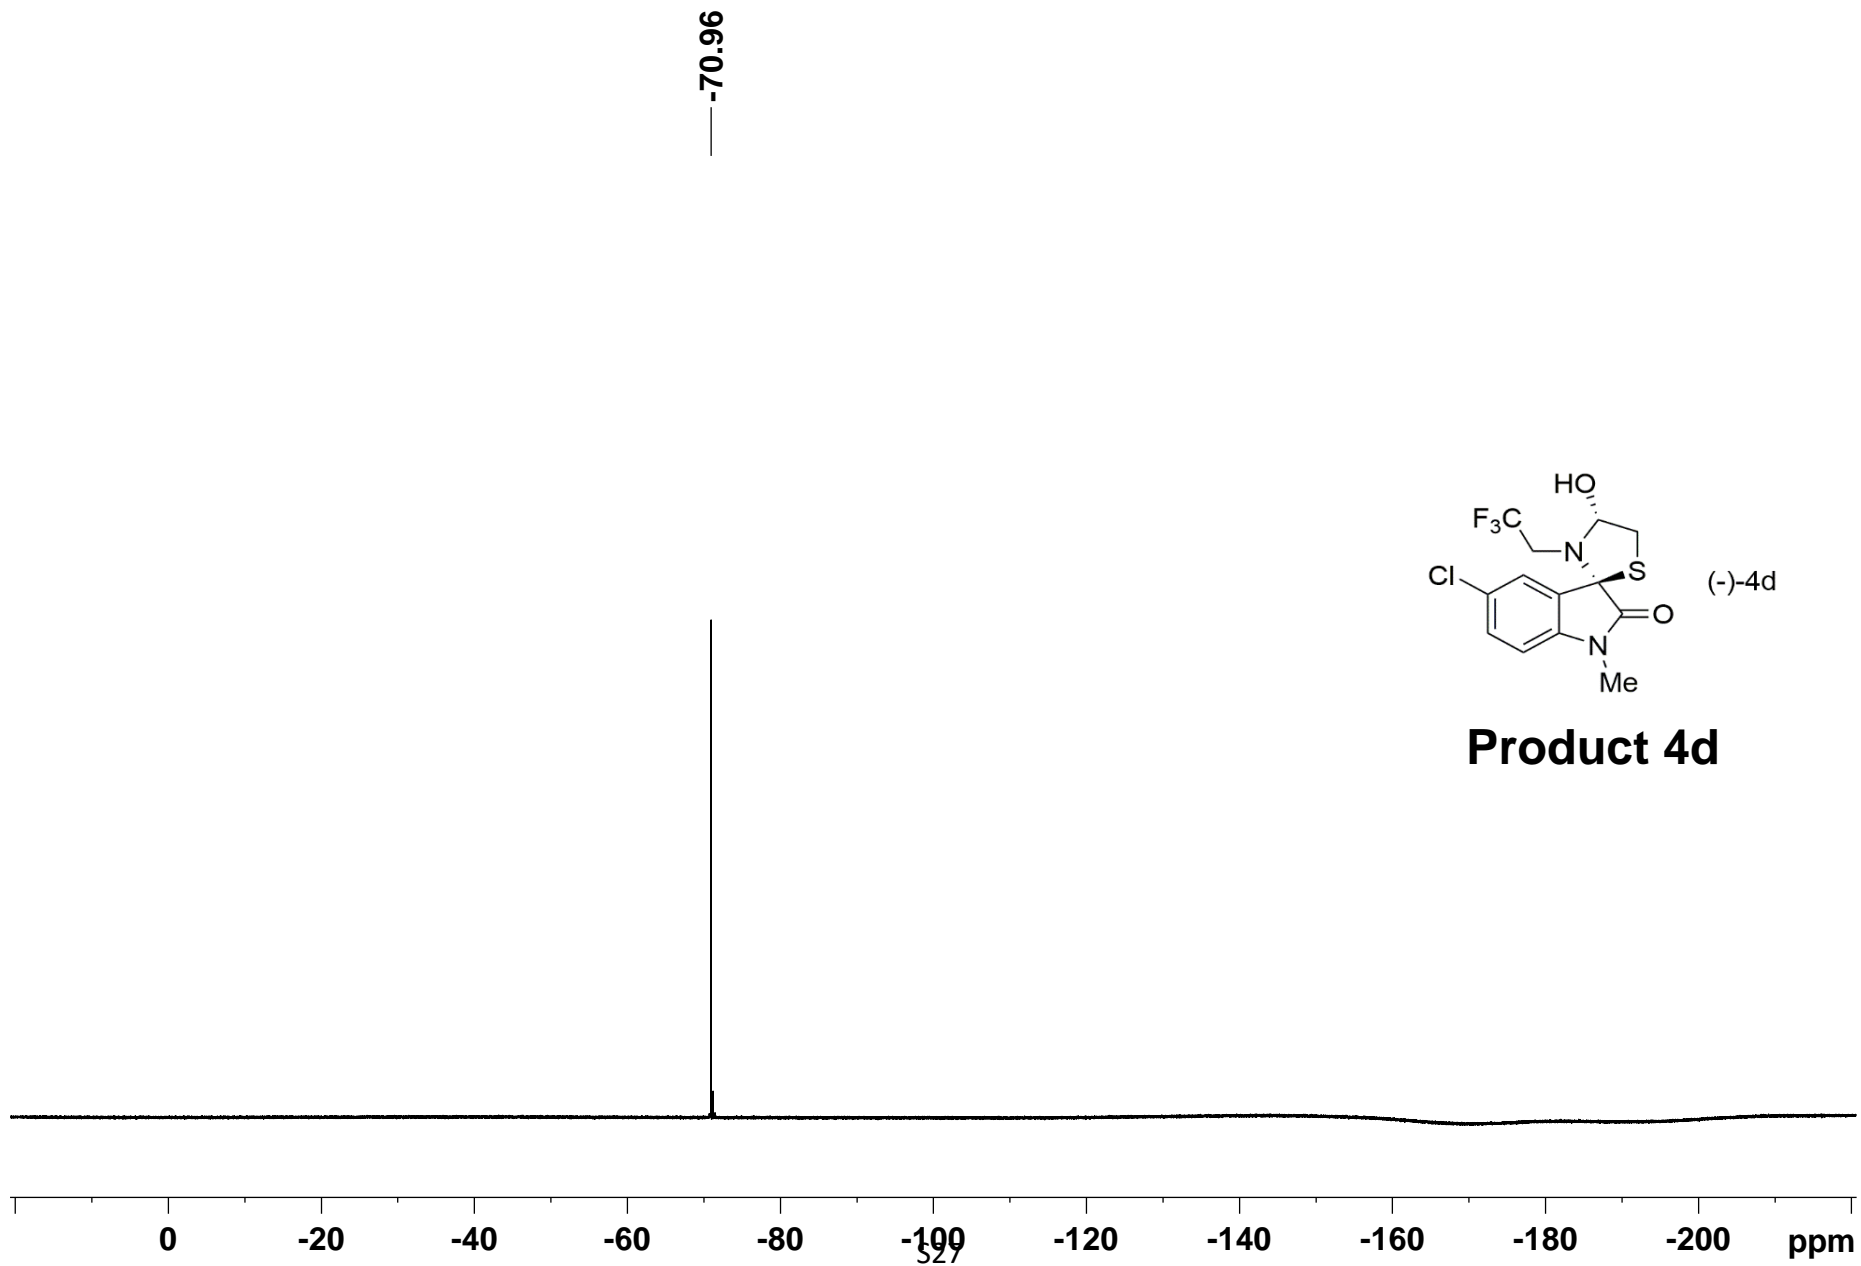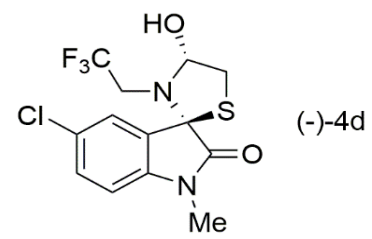

**Product 4d**

7.600  
7.598  
7.503  
7.497  
7.482  
7.477  
7.260  
6.742  
6.721

5.463  
5.454  
5.433  
5.423  
5.417  
5.388

3.794  
3.772  
3.759  
3.750  
3.734  
3.724  
3.713

3.691  
3.364  
3.338  
3.215

2.447  
2.424  
2.409  
2.400  
2.386  
2.377  
2.362  
2.339  
1.647  
1.247  
0.872

0.064  
-0.008

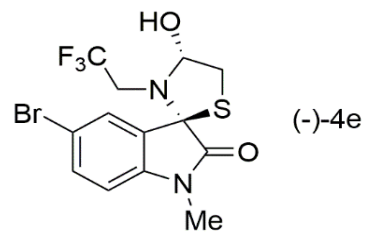

**Product 4e**

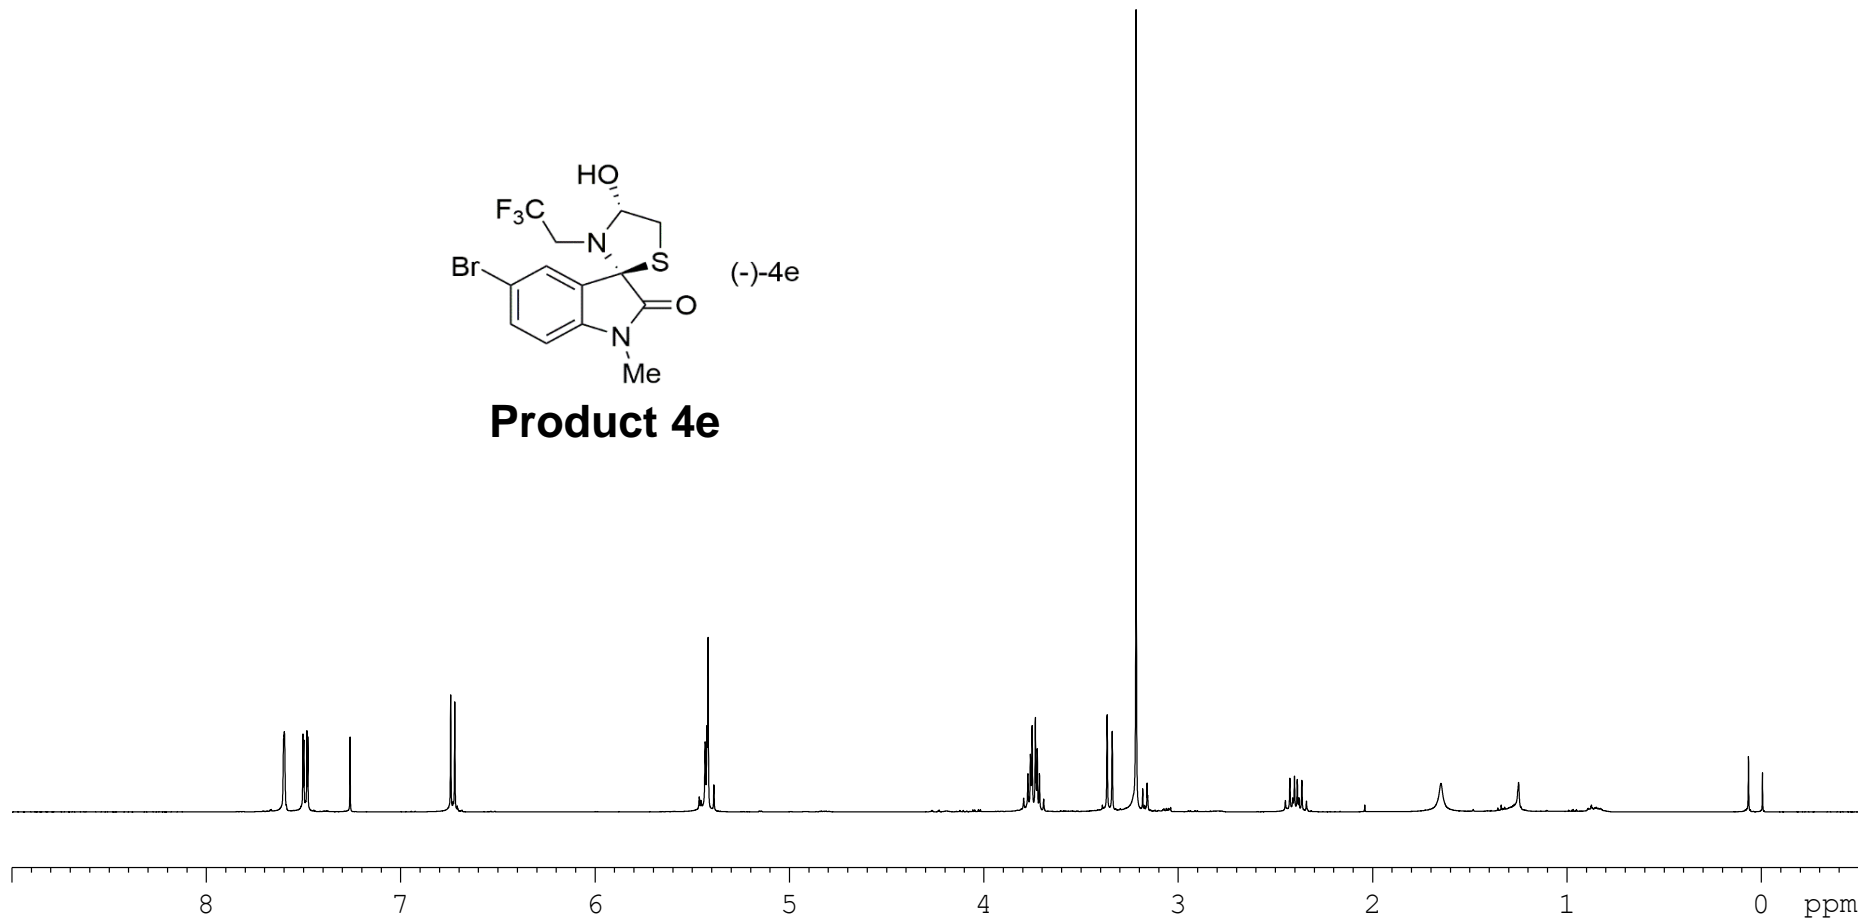

0.939  
0.976

1.006

1.990

S28

2.005

1.010  
3.000

1.026

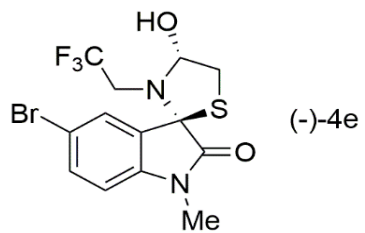

**Product 4e**

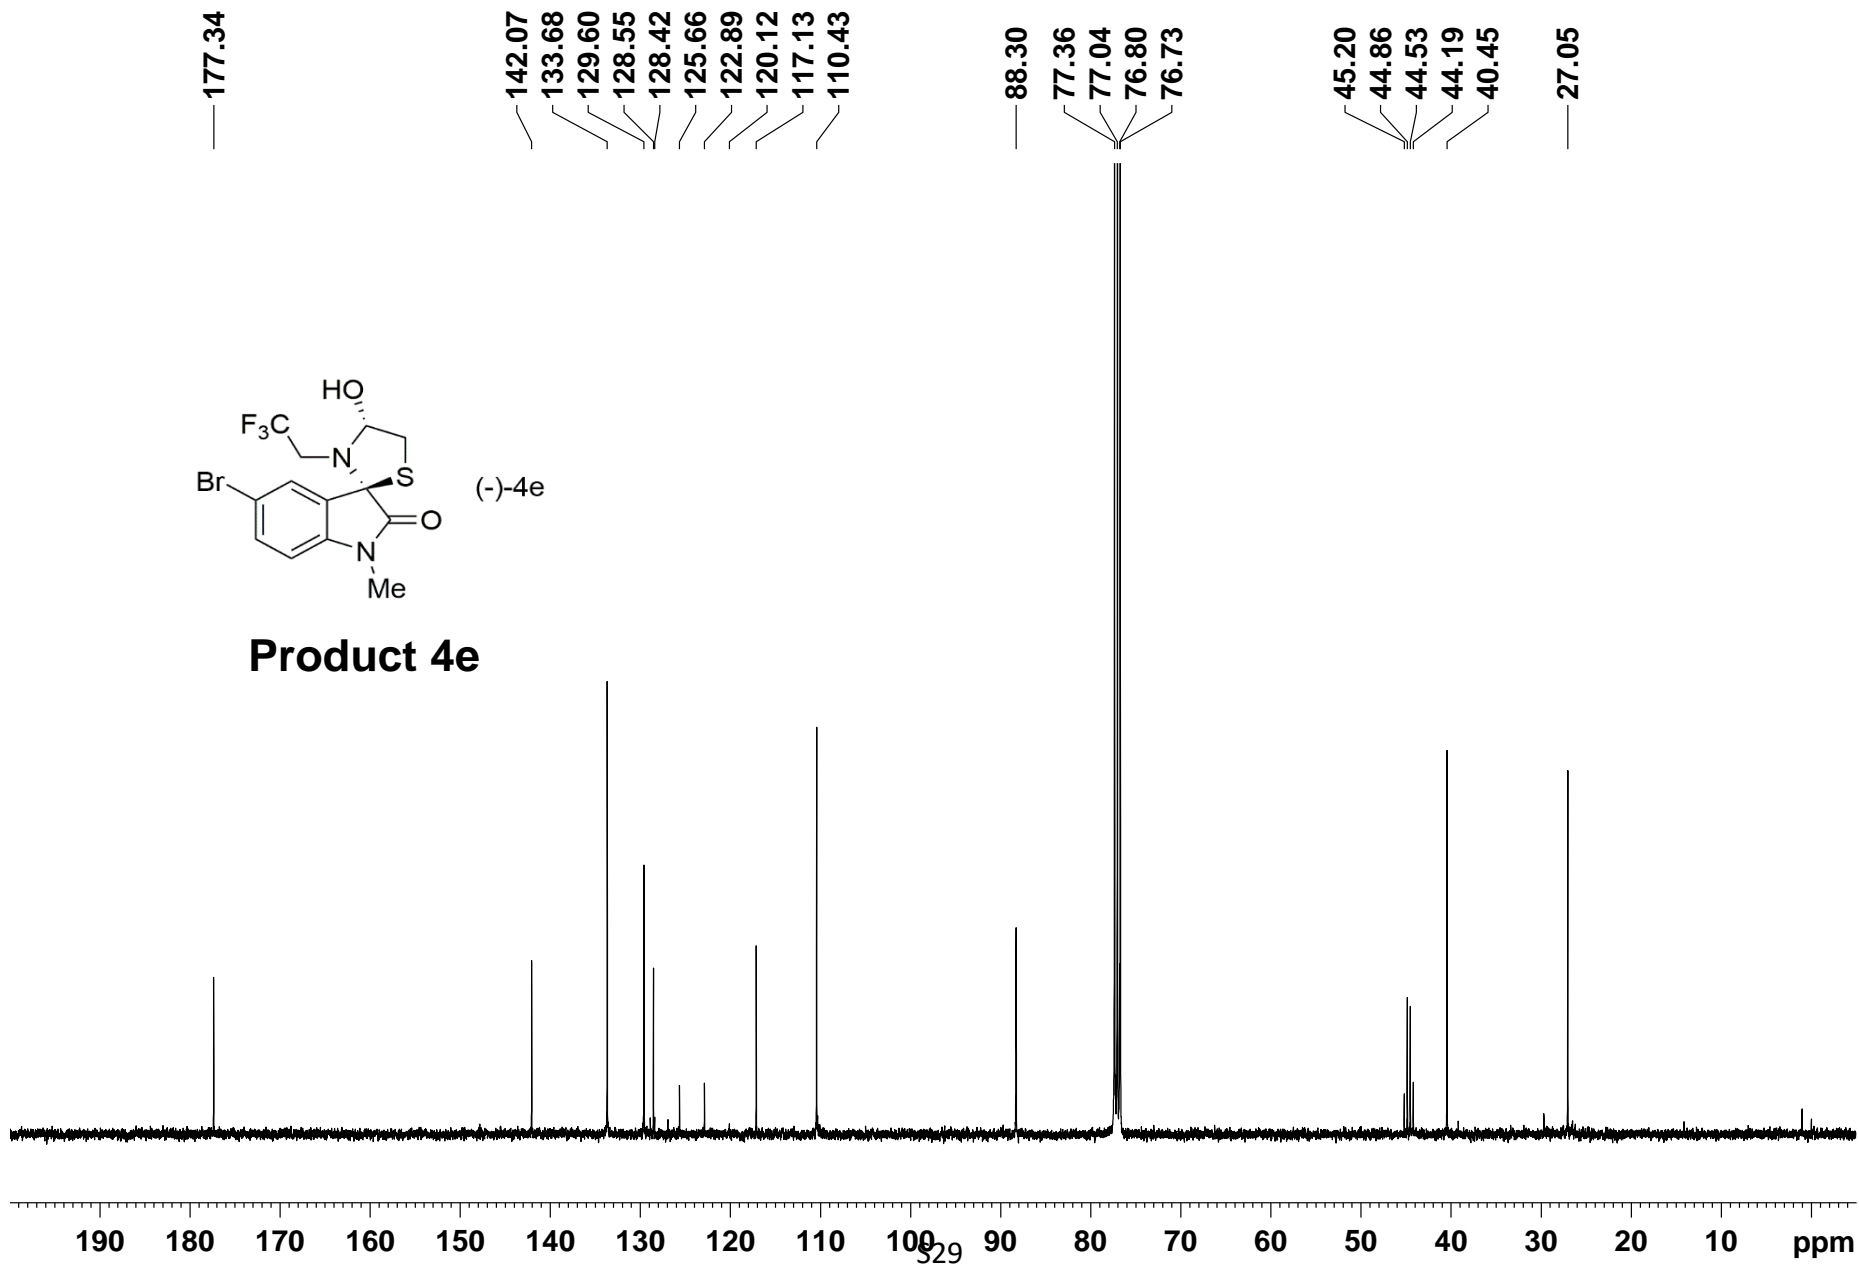

-70.97

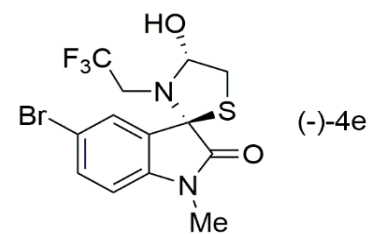

**Product 4e**

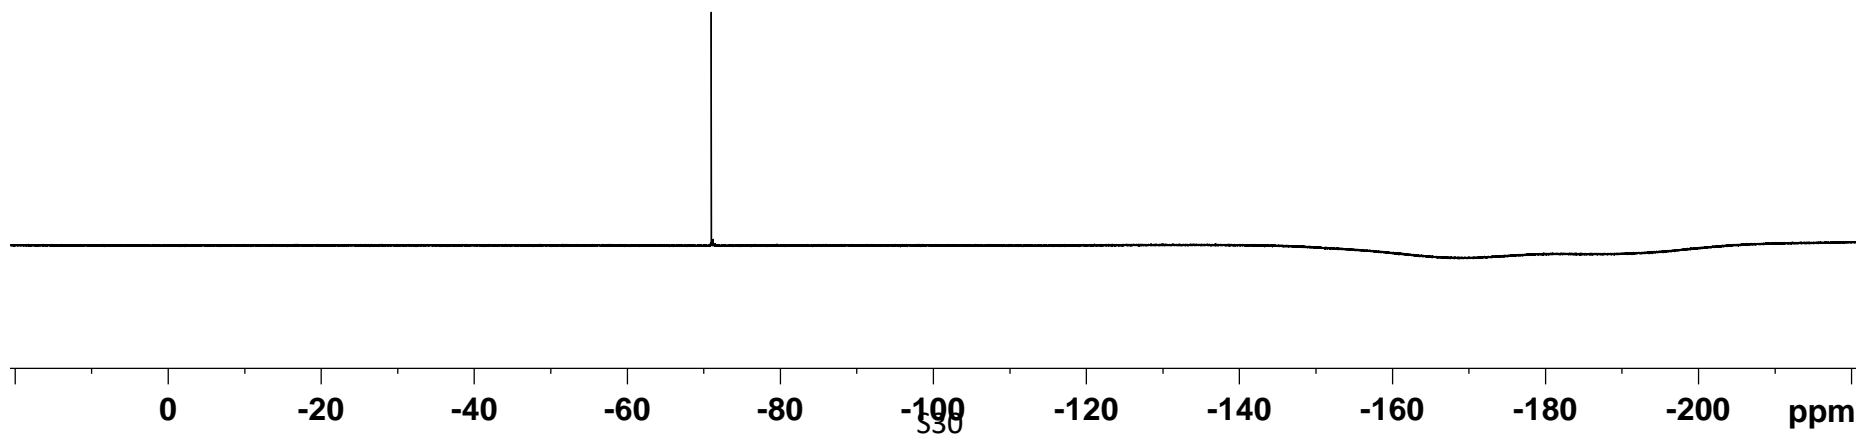

7.768  
7.696  
7.692  
7.676  
7.672  
7.260

6.639  
6.619

5.459  
5.450  
5.429  
5.419  
5.408  
5.378

3.790  
3.768  
3.757  
3.747  
3.731  
3.722  
3.709

3.687  
3.363  
3.337  
3.208

2.443  
2.420  
2.405  
2.396  
2.382  
2.373  
2.358  
2.335  
1.637  
1.248

0.837

-0.006

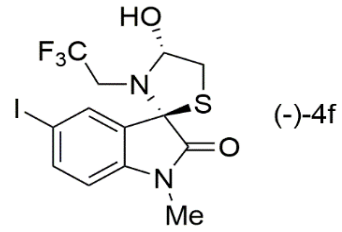

**Product 4f**

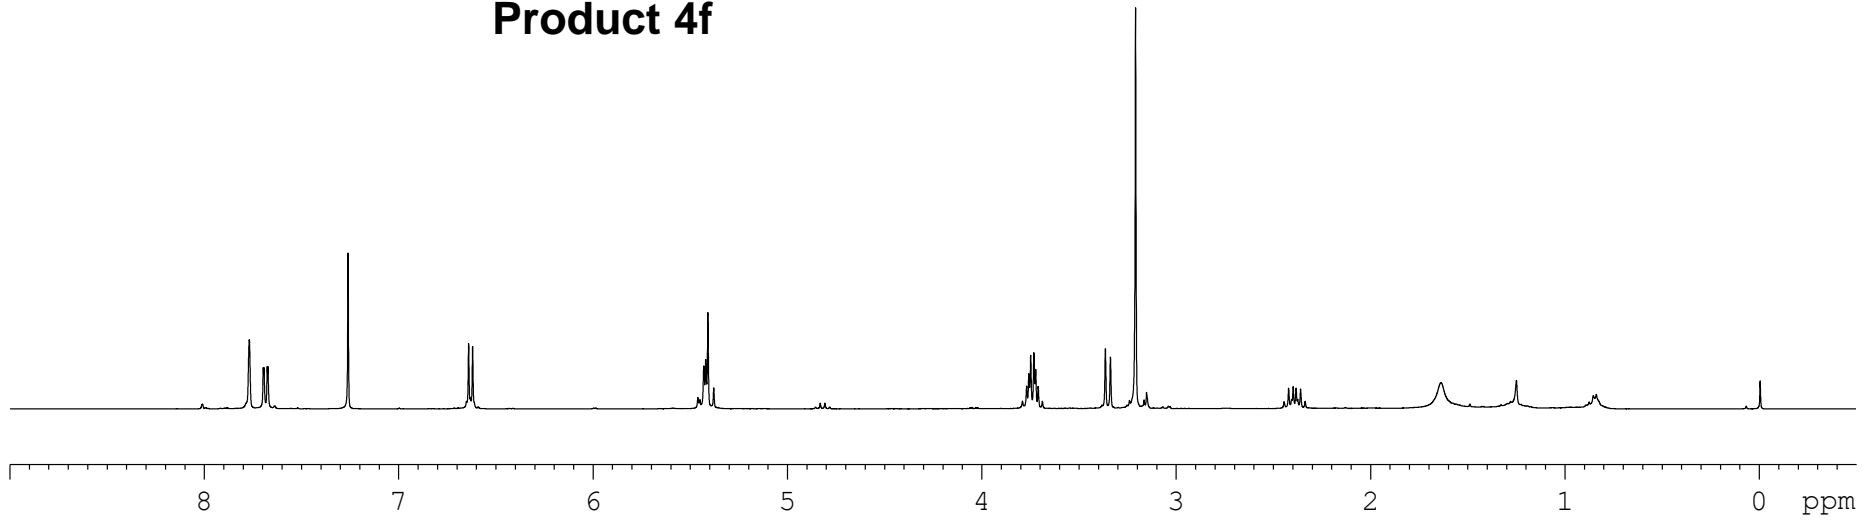

1.014  
1.036

1.079

2.005

S31

2.005

1.031  
3.000

1.068

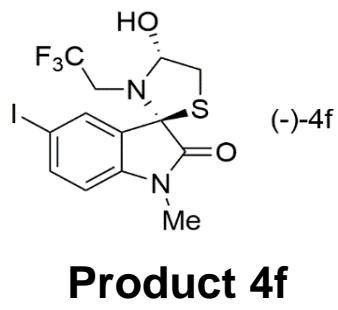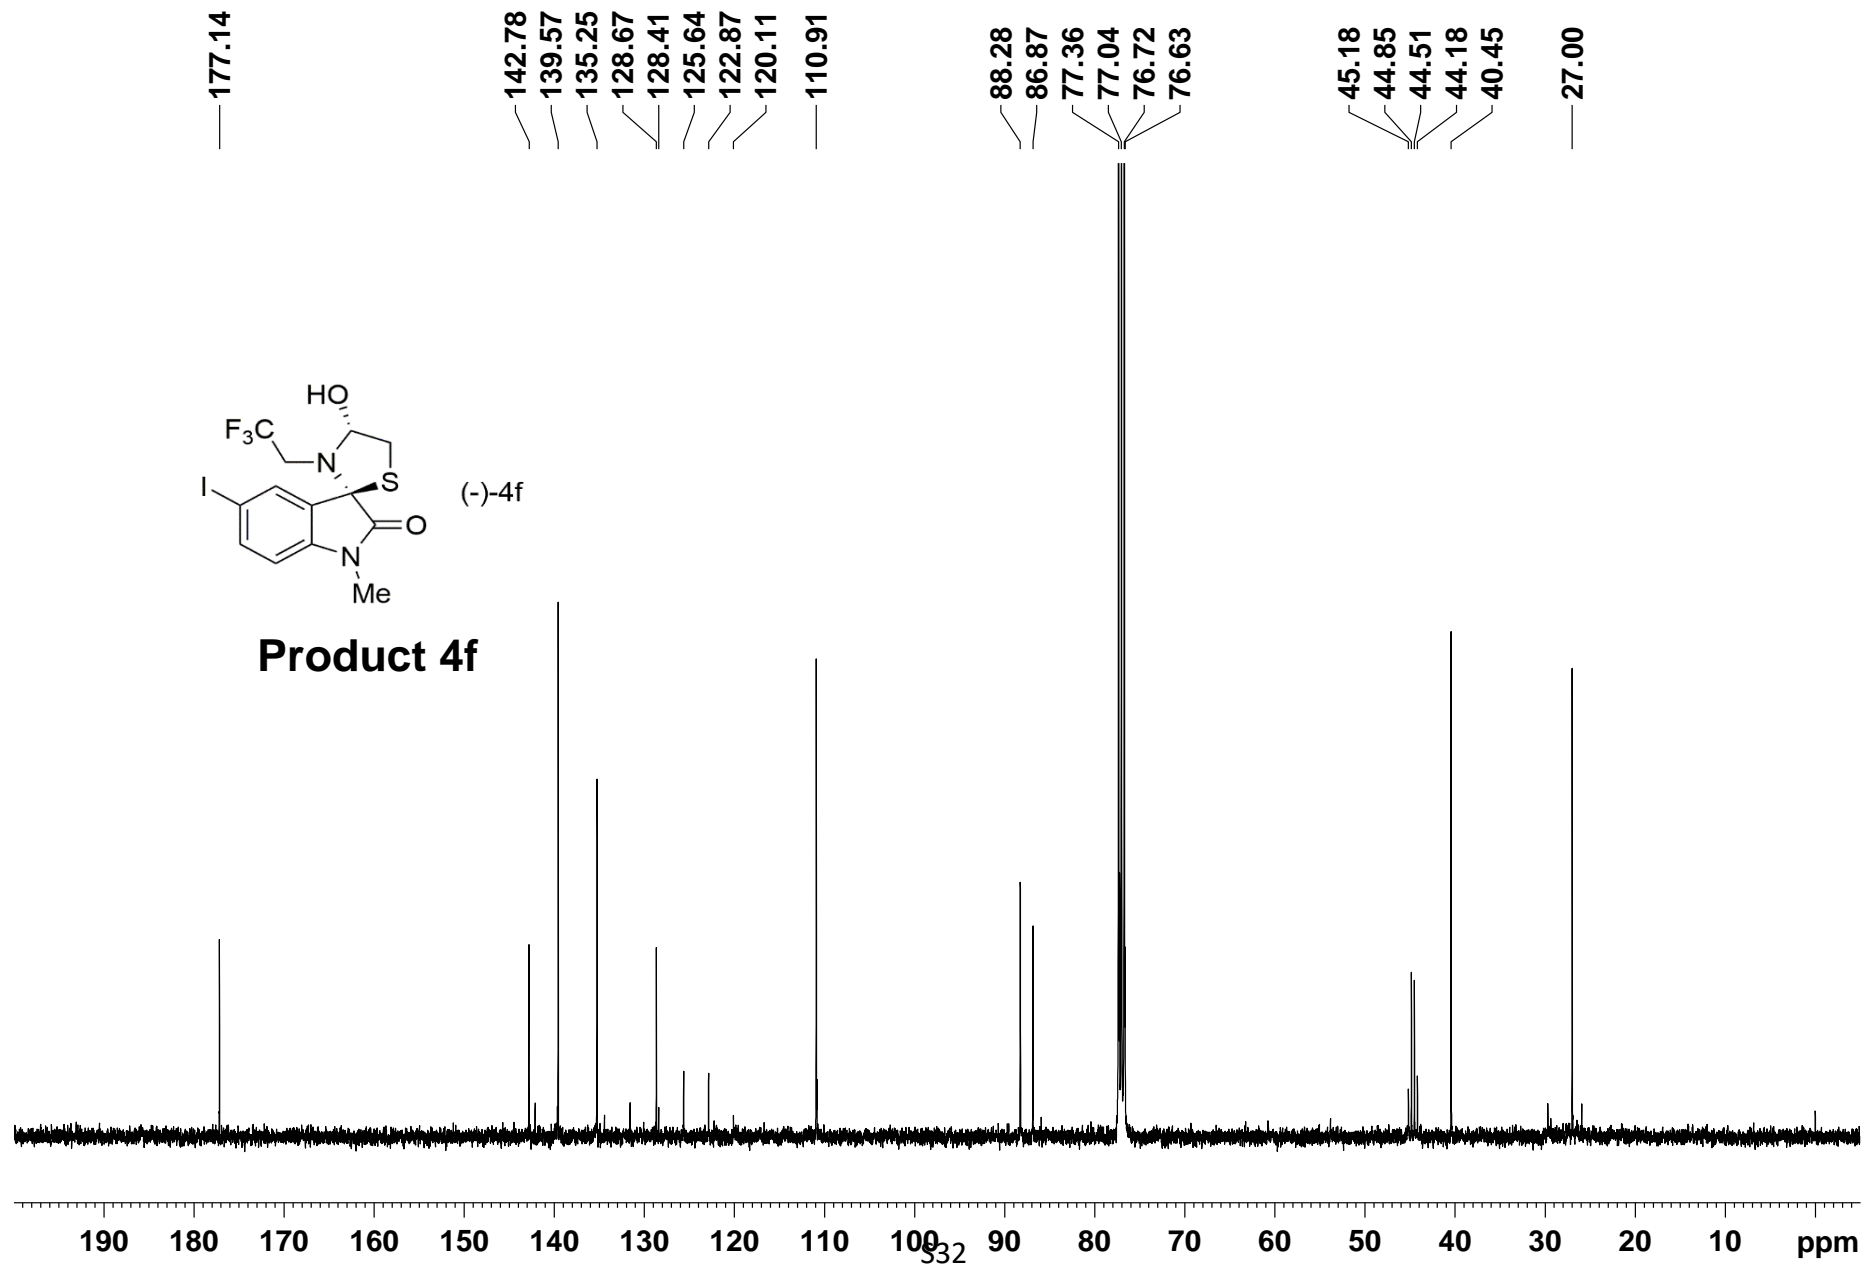



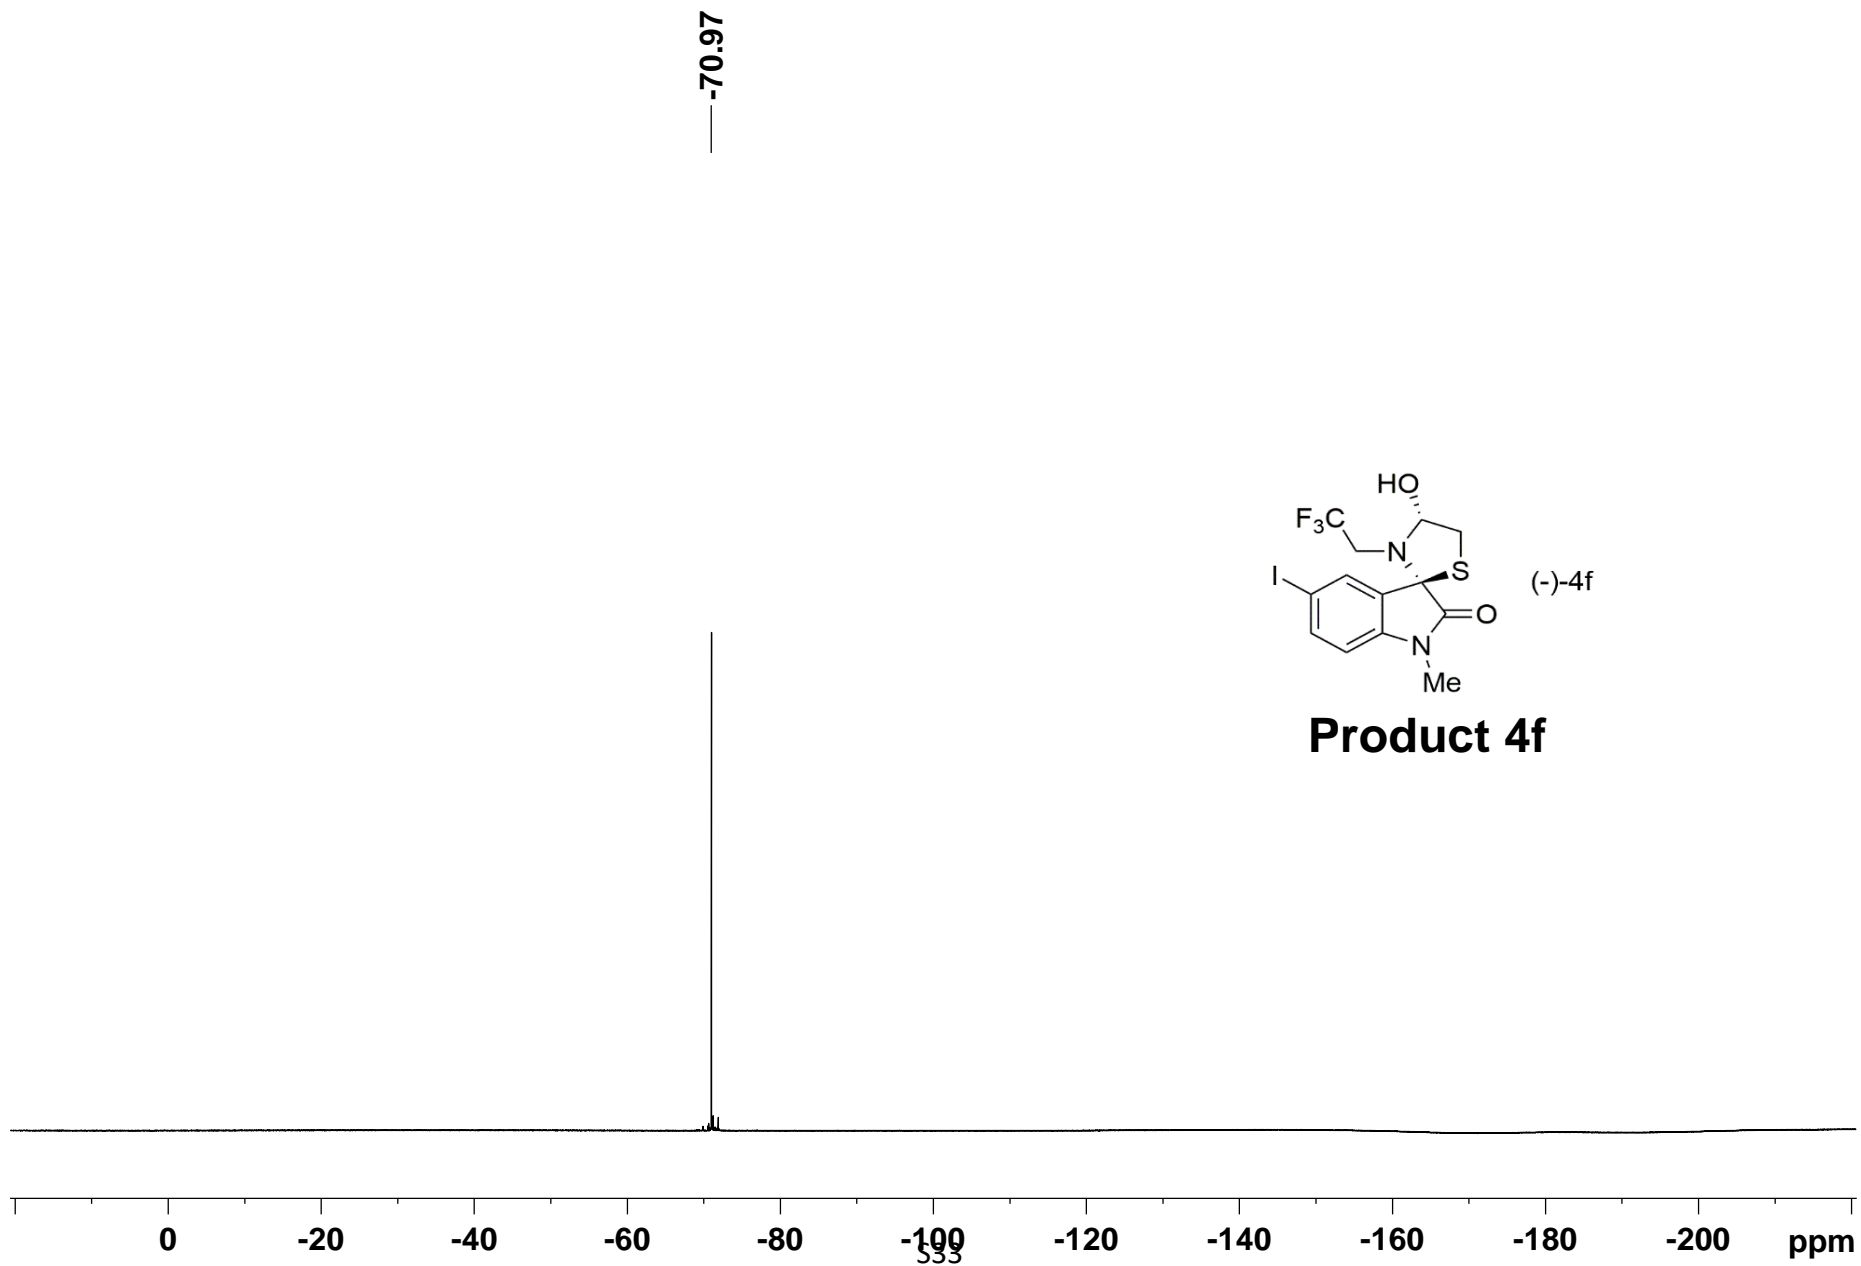

7.312  
7.264  
7.173  
7.153  
6.743  
6.724

5.671  
5.642  
5.476  
5.465  
5.446  
5.435

3.780  
3.763  
3.752  
3.737  
3.725  
3.699  
3.678  
3.370  
3.344  
3.212  
2.468  
2.444  
2.430  
2.420  
2.406  
2.397  
2.383  
2.355  
1.622

-0.000

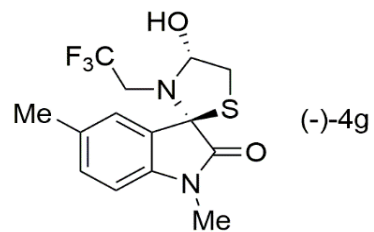

**Product 4g**

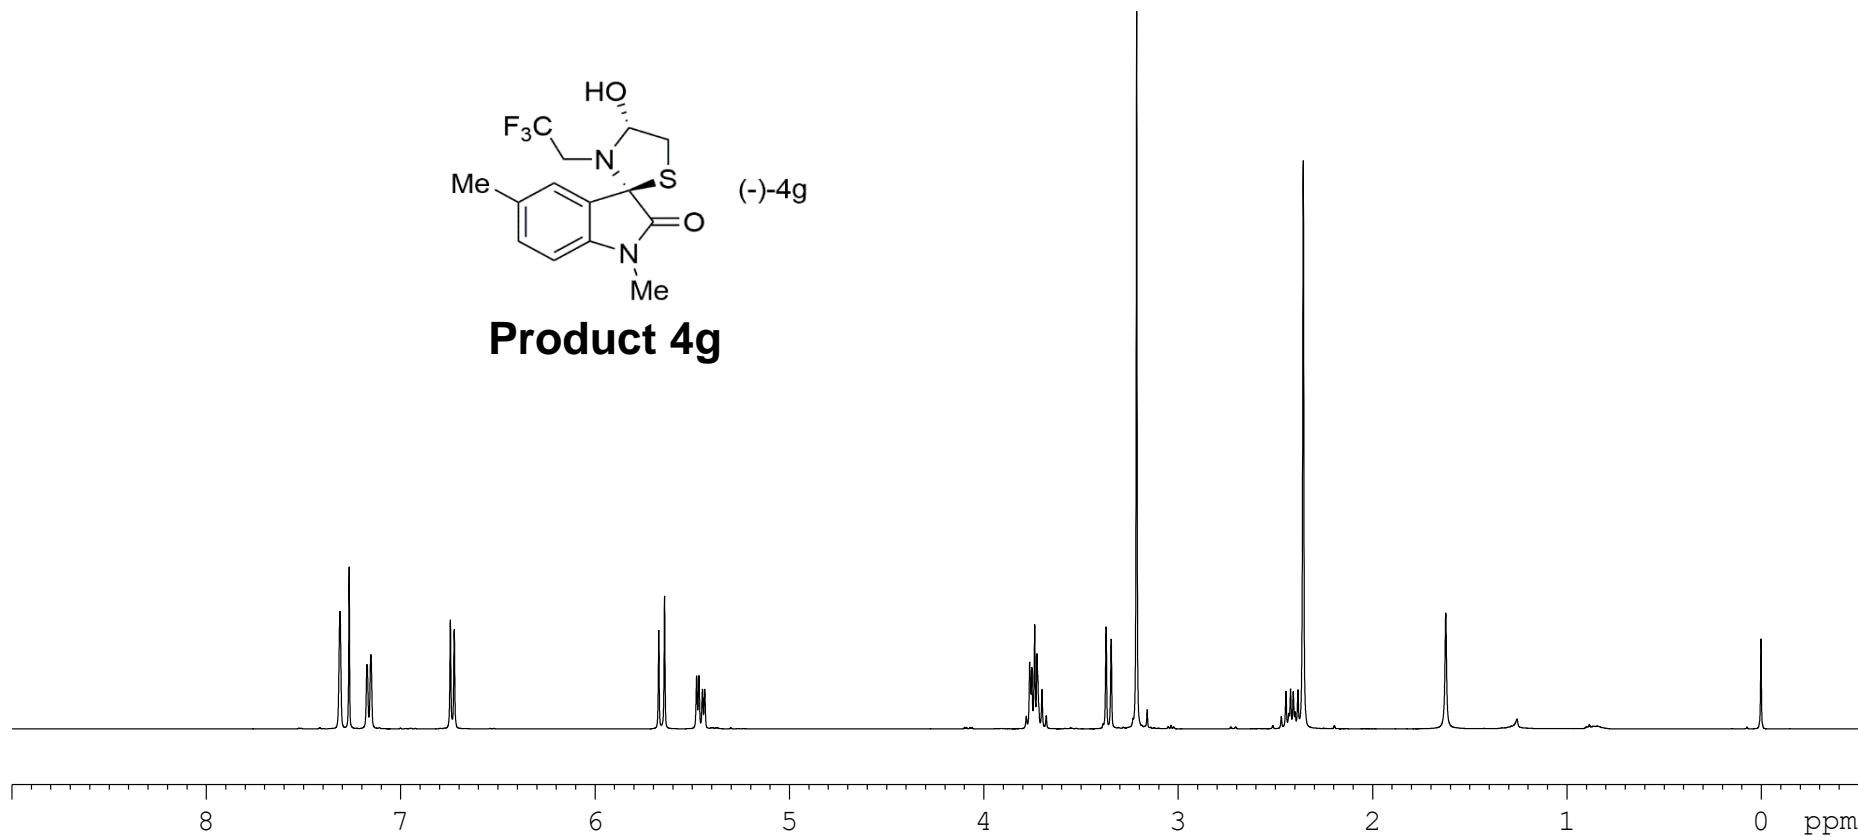

0.975  
1.053

1.008

1.011  
1.003

S34

2.056

1.043  
3.000

1.037  
3.136

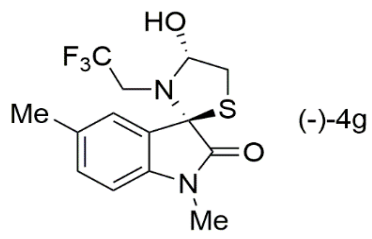

**Product 4g**

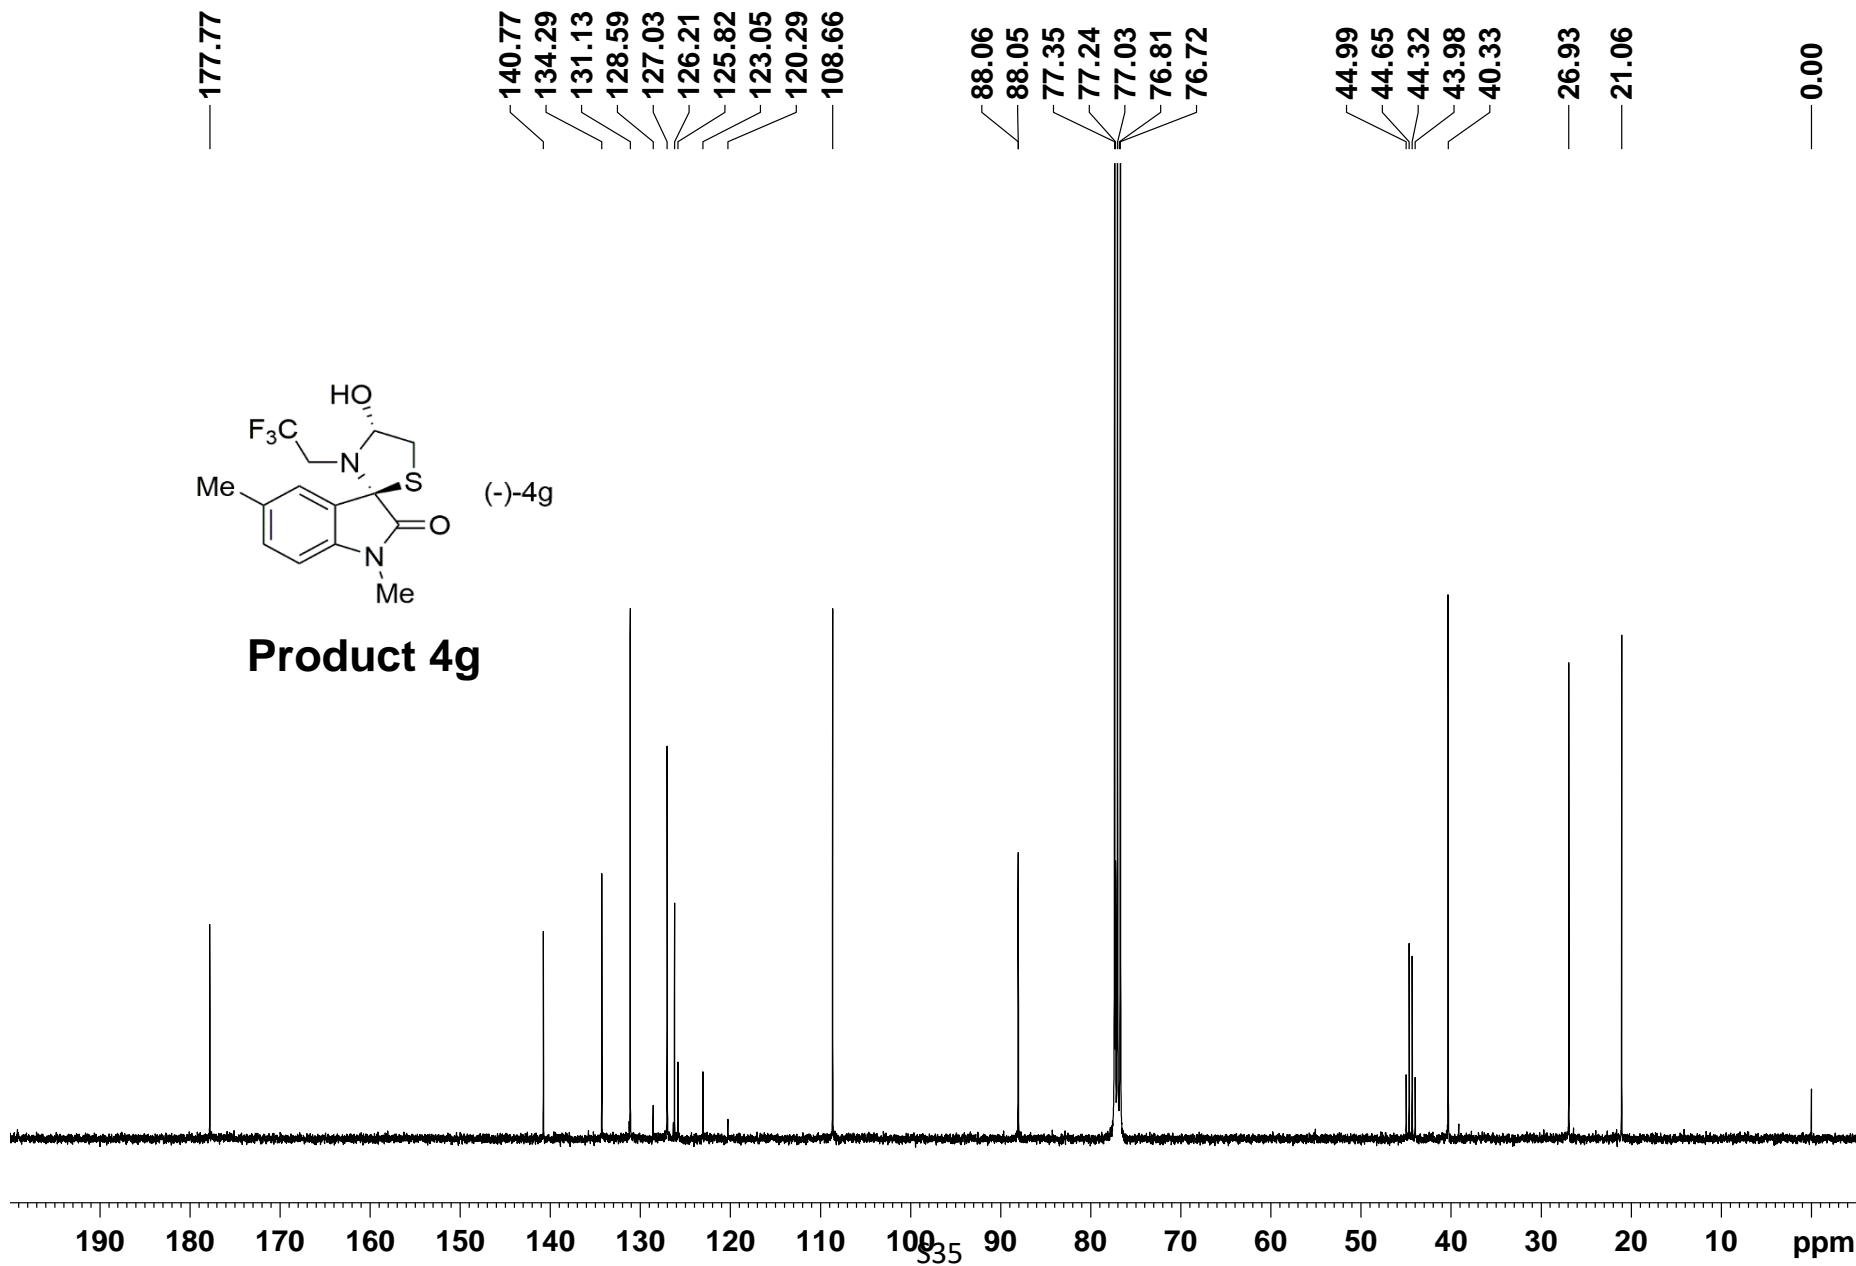

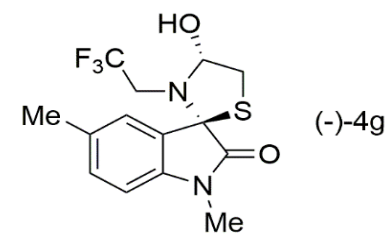

**Product 4g**

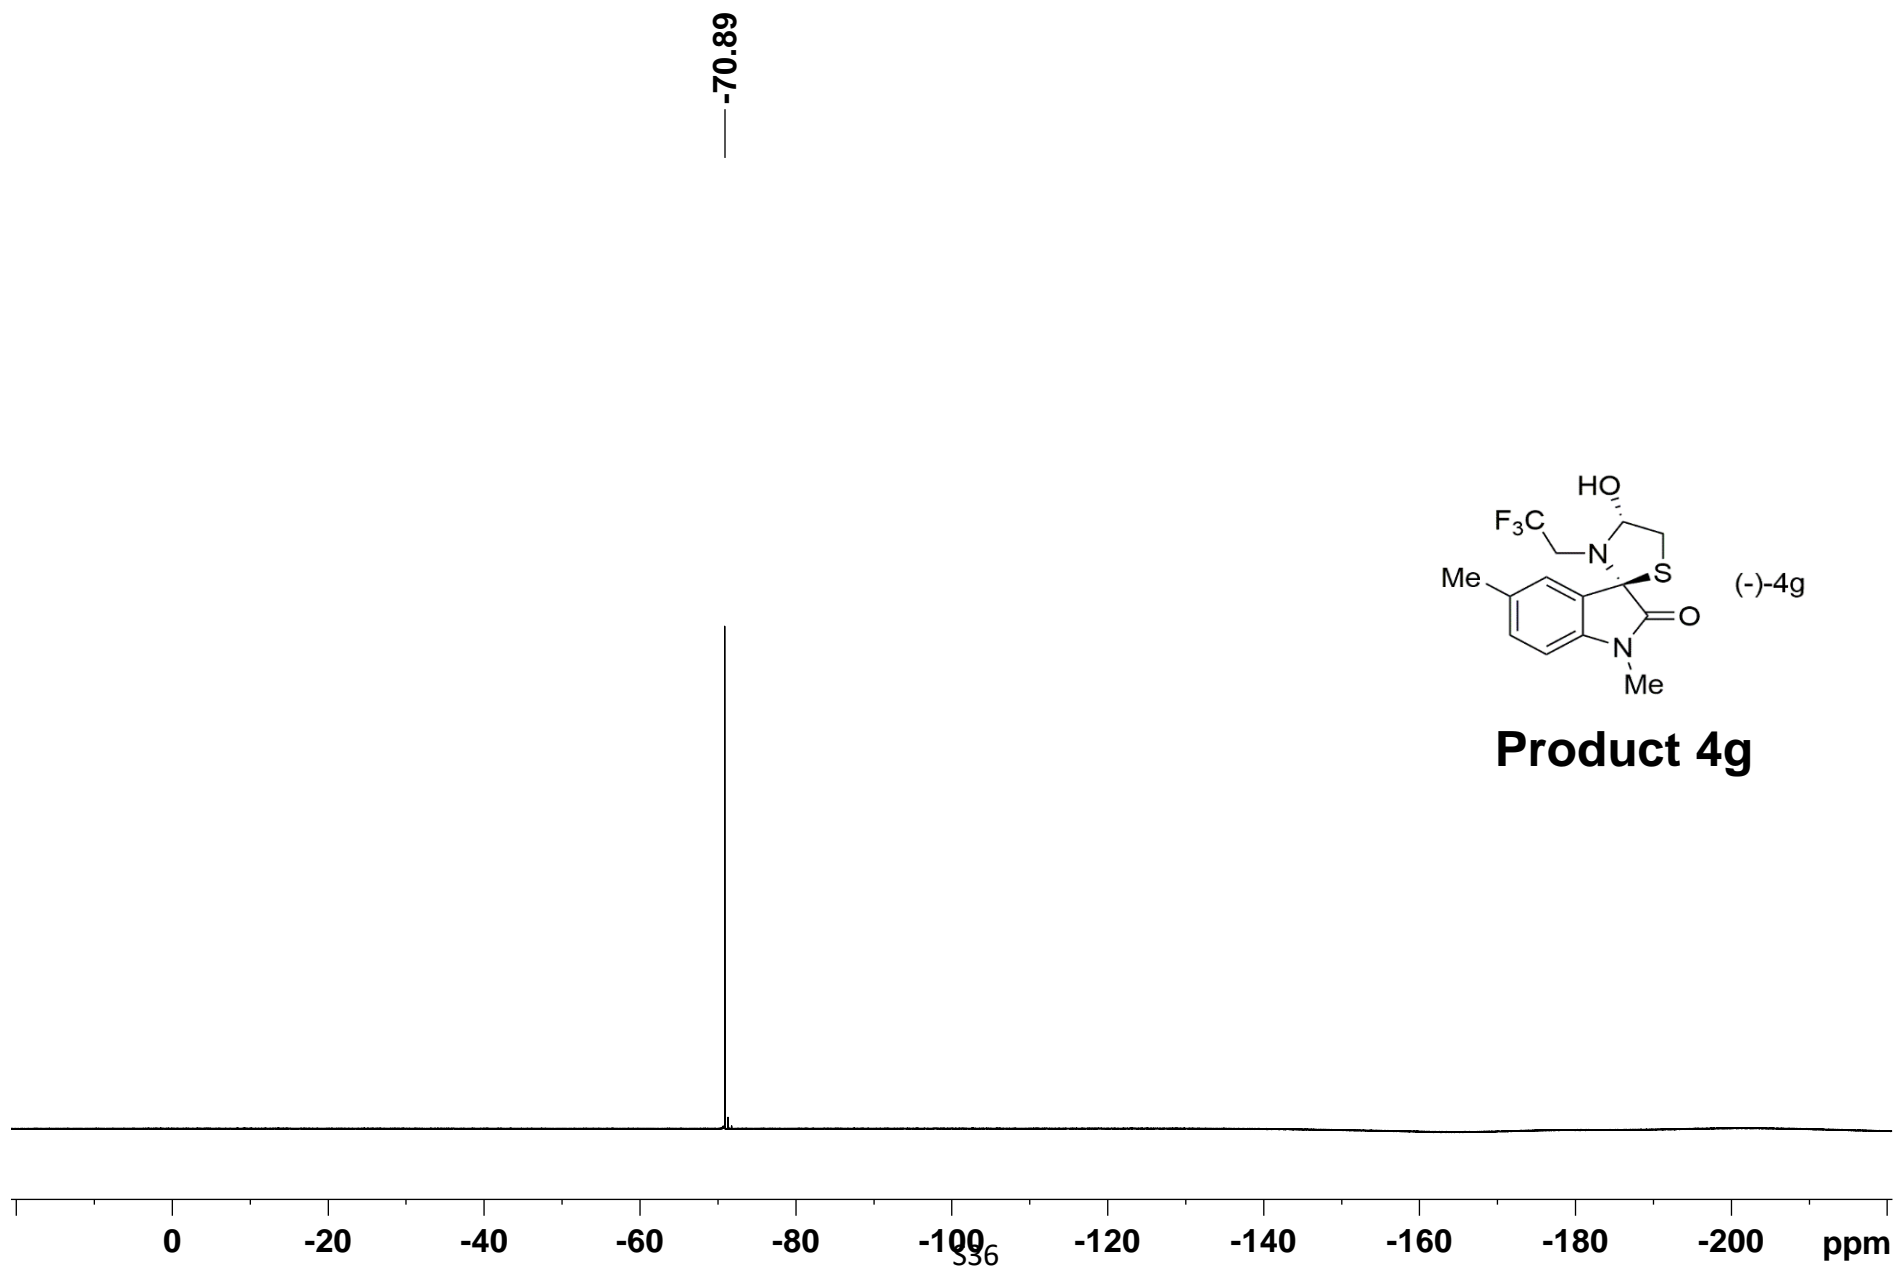

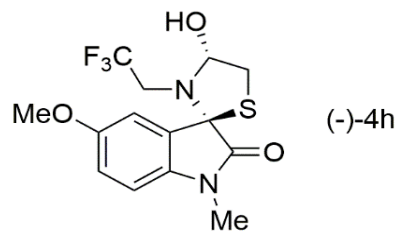

**Product 4h**

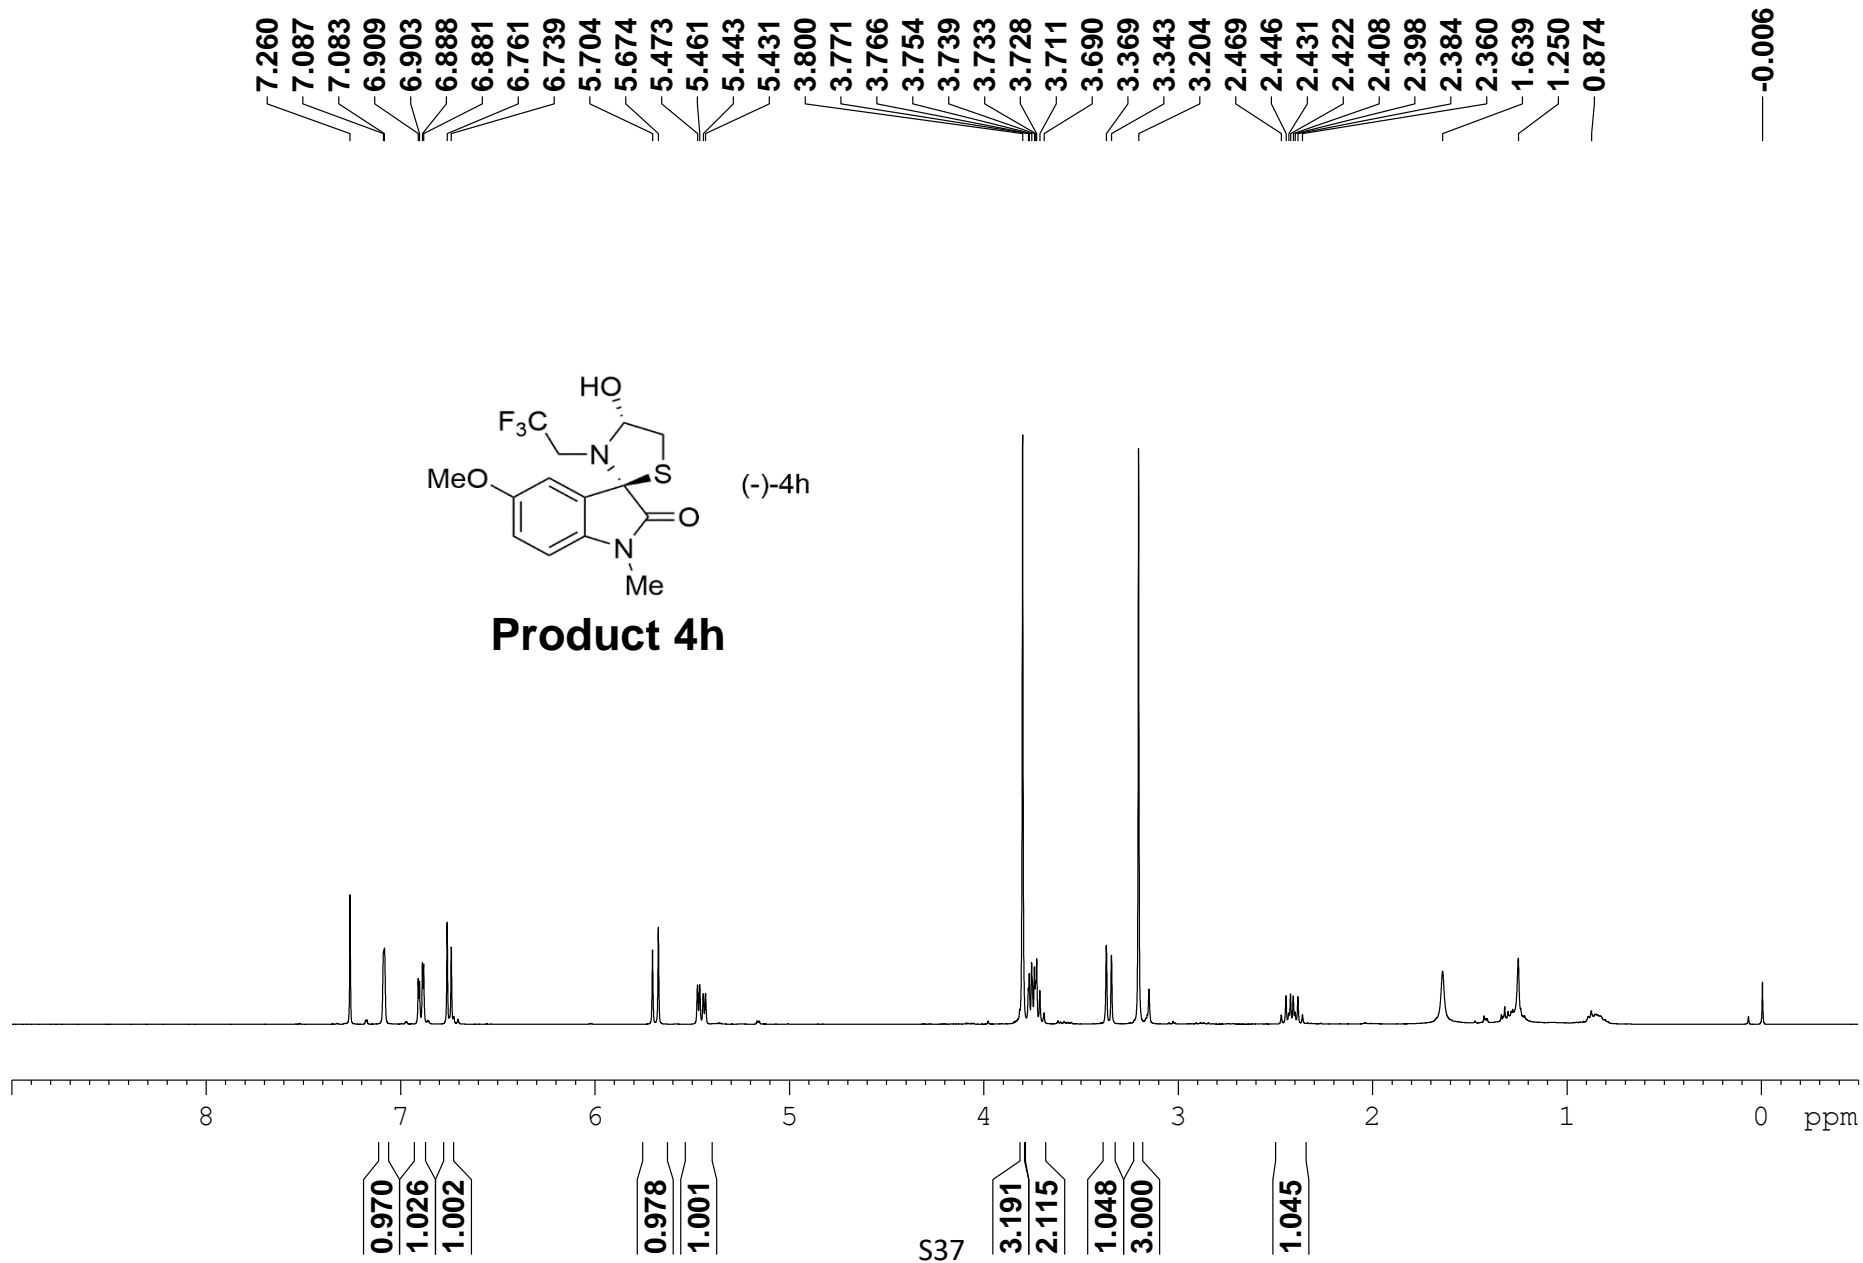

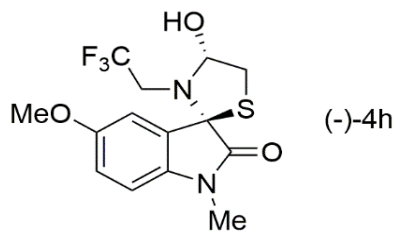

**Product 4h**

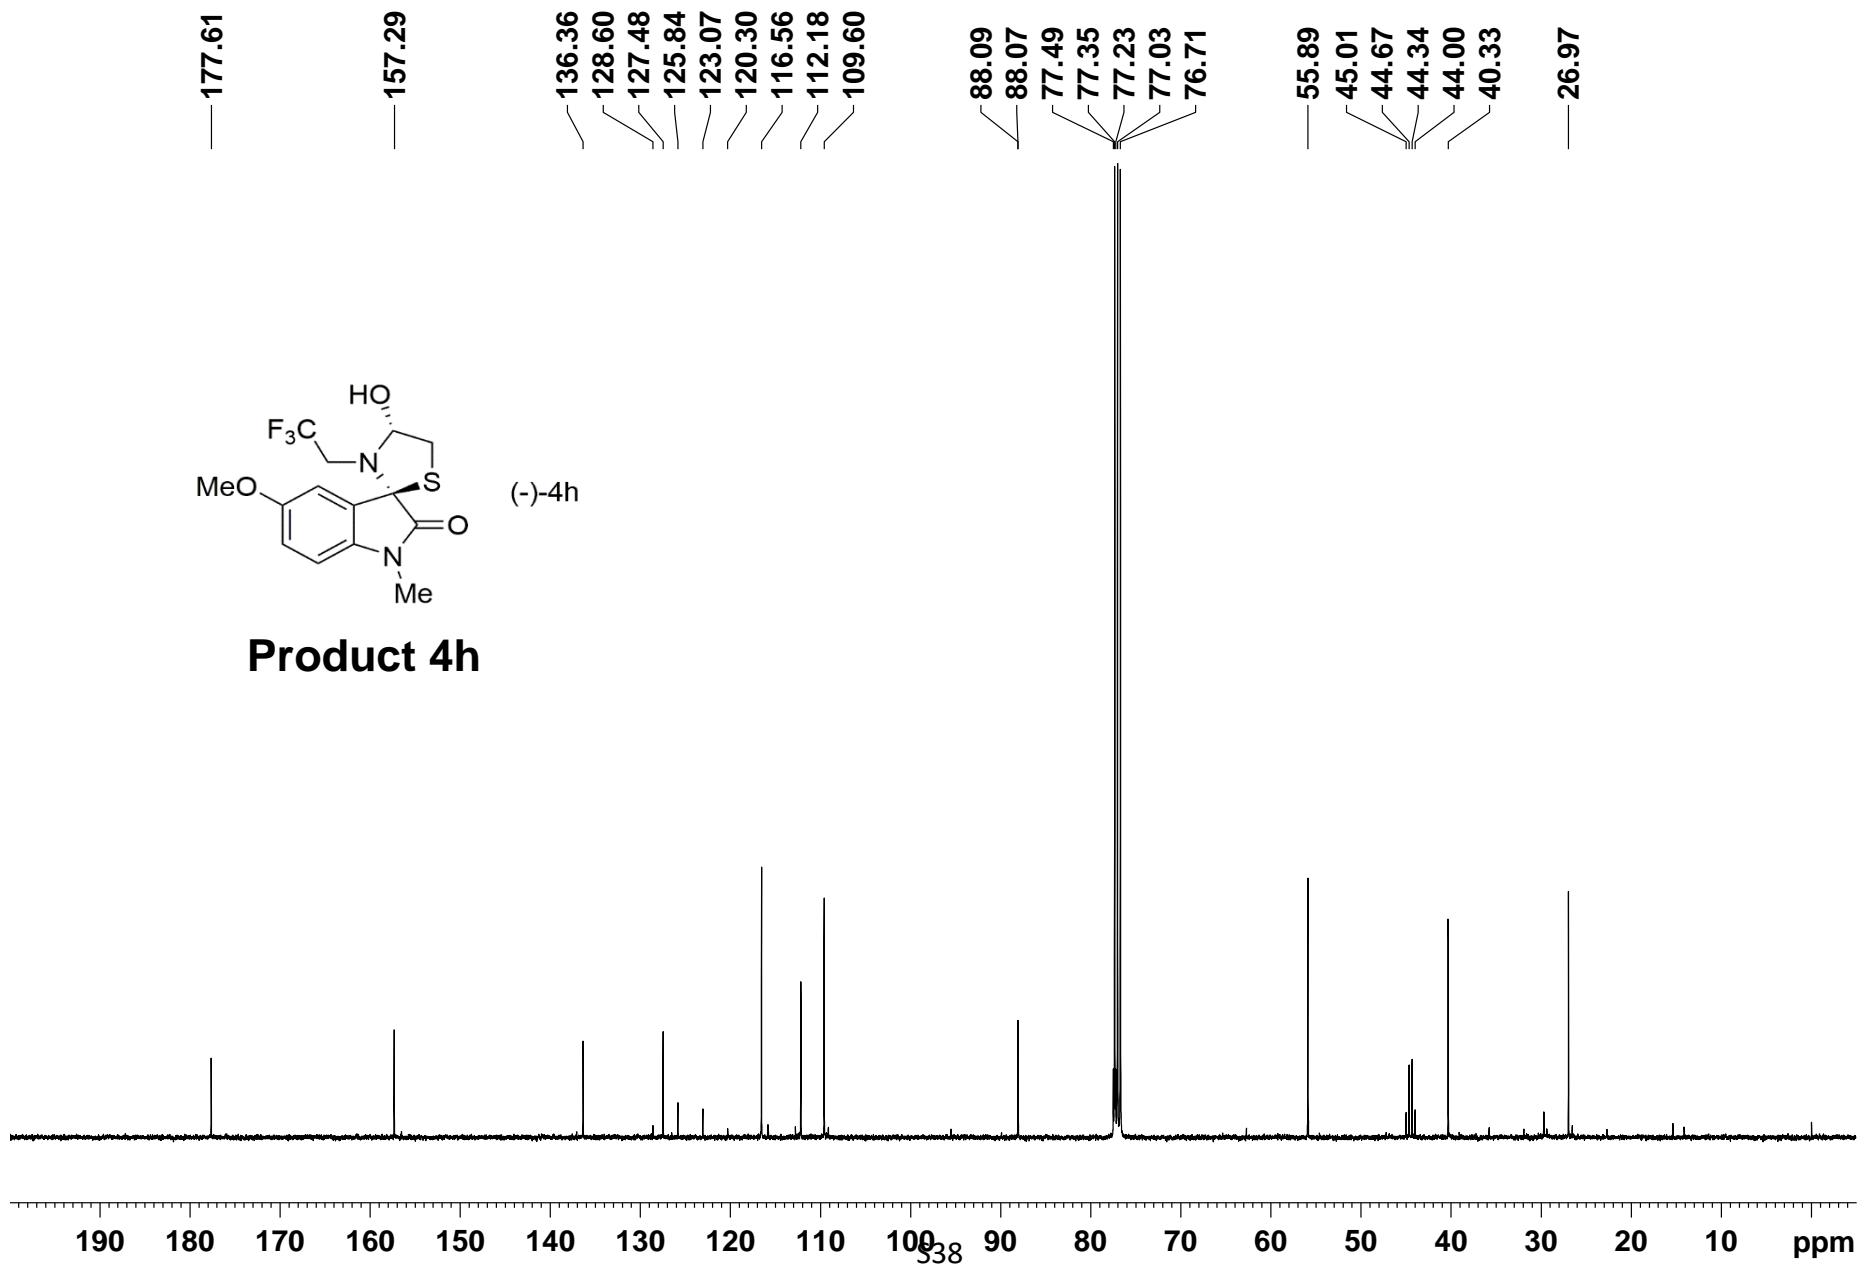

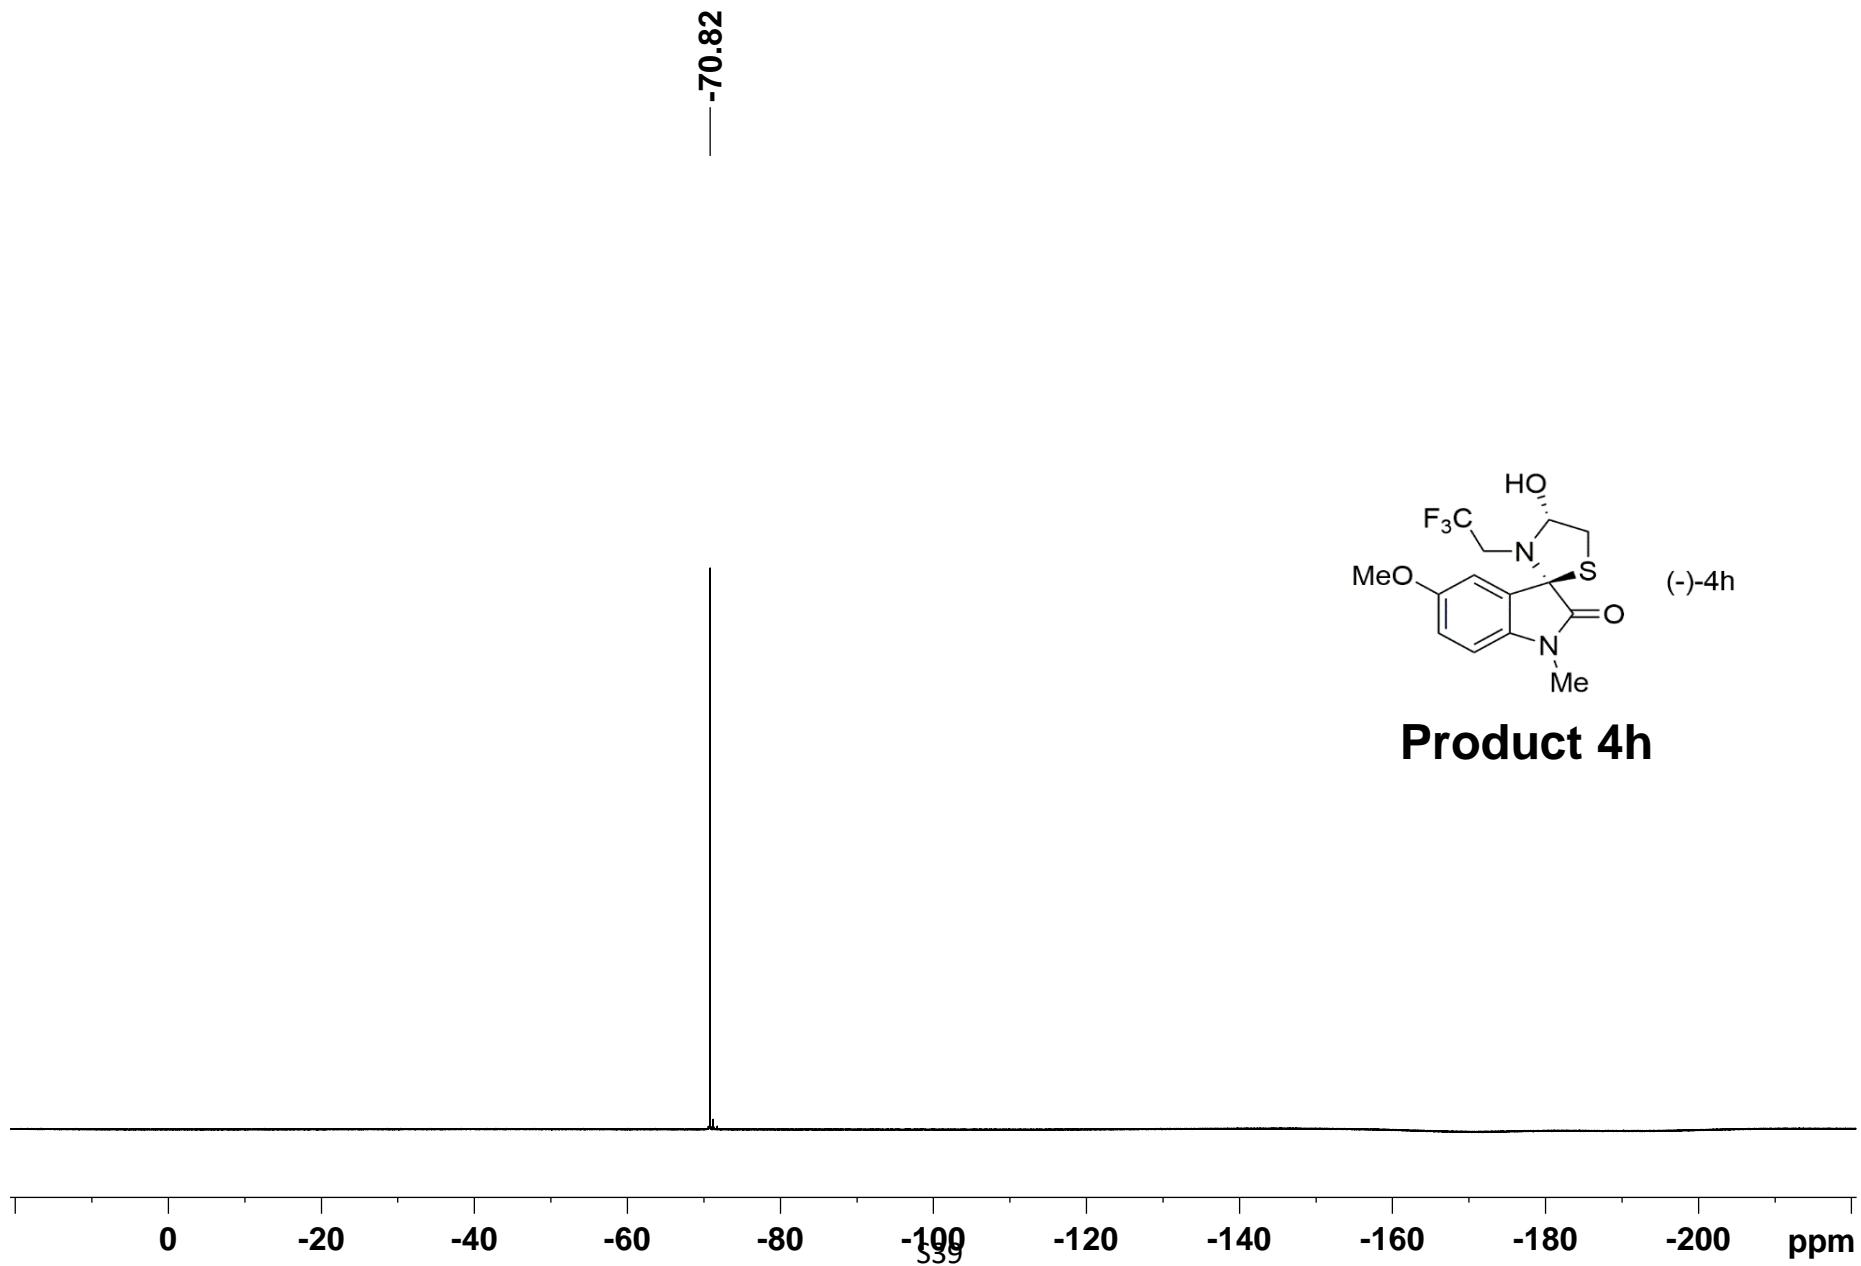

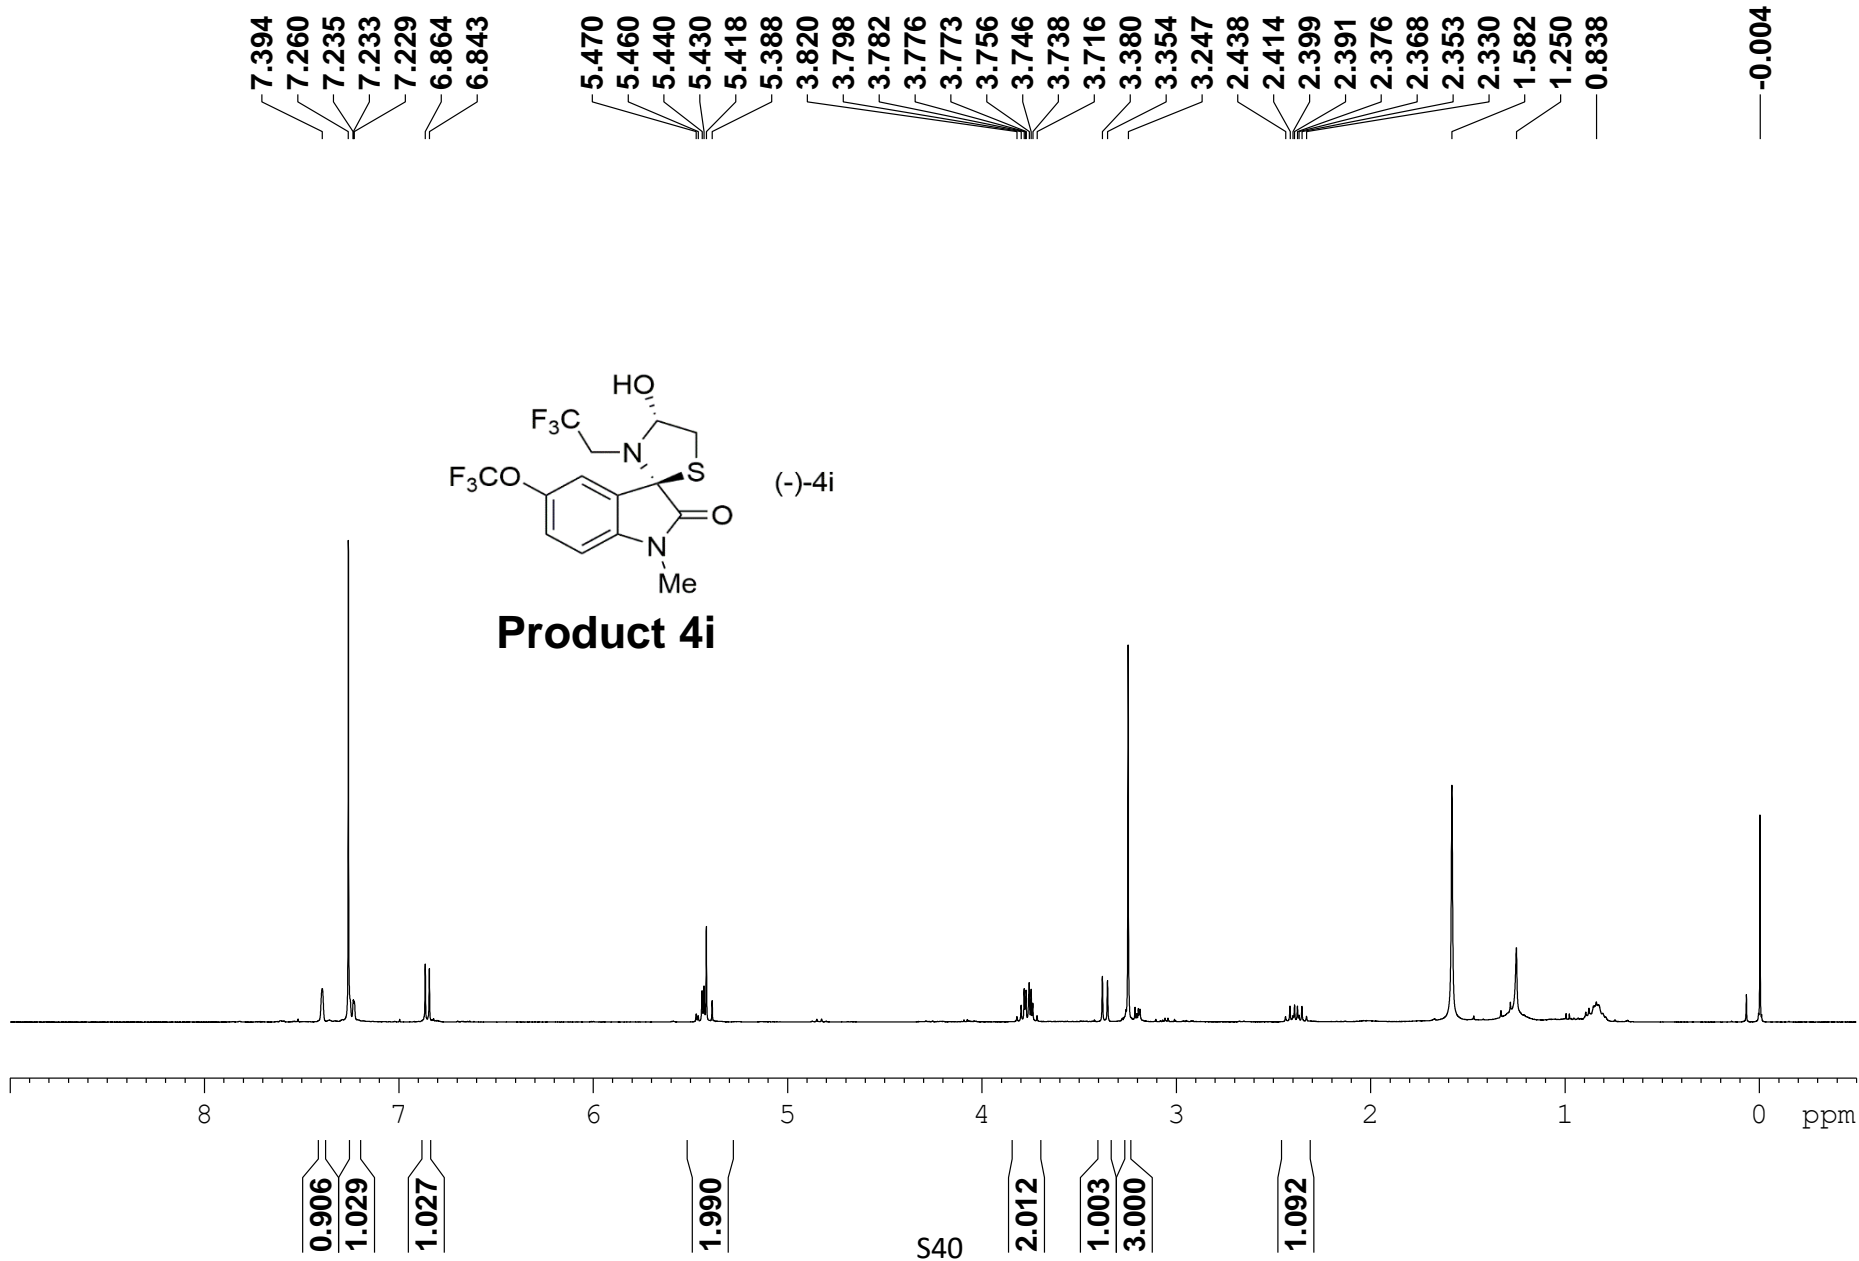



— 177.82

145.98  
141.60  
128.39  
128.33  
125.63  
124.28  
124.11  
122.86  
121.73  
120.36  
120.10  
119.17  
116.62  
109.64

88.39  
77.35  
77.23  
77.03  
76.90  
76.71

45.21  
44.87  
44.53  
44.20  
40.47

— 27.13

— 0.01

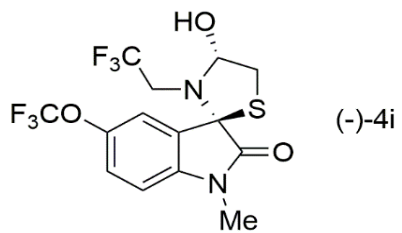

**Product 4i**

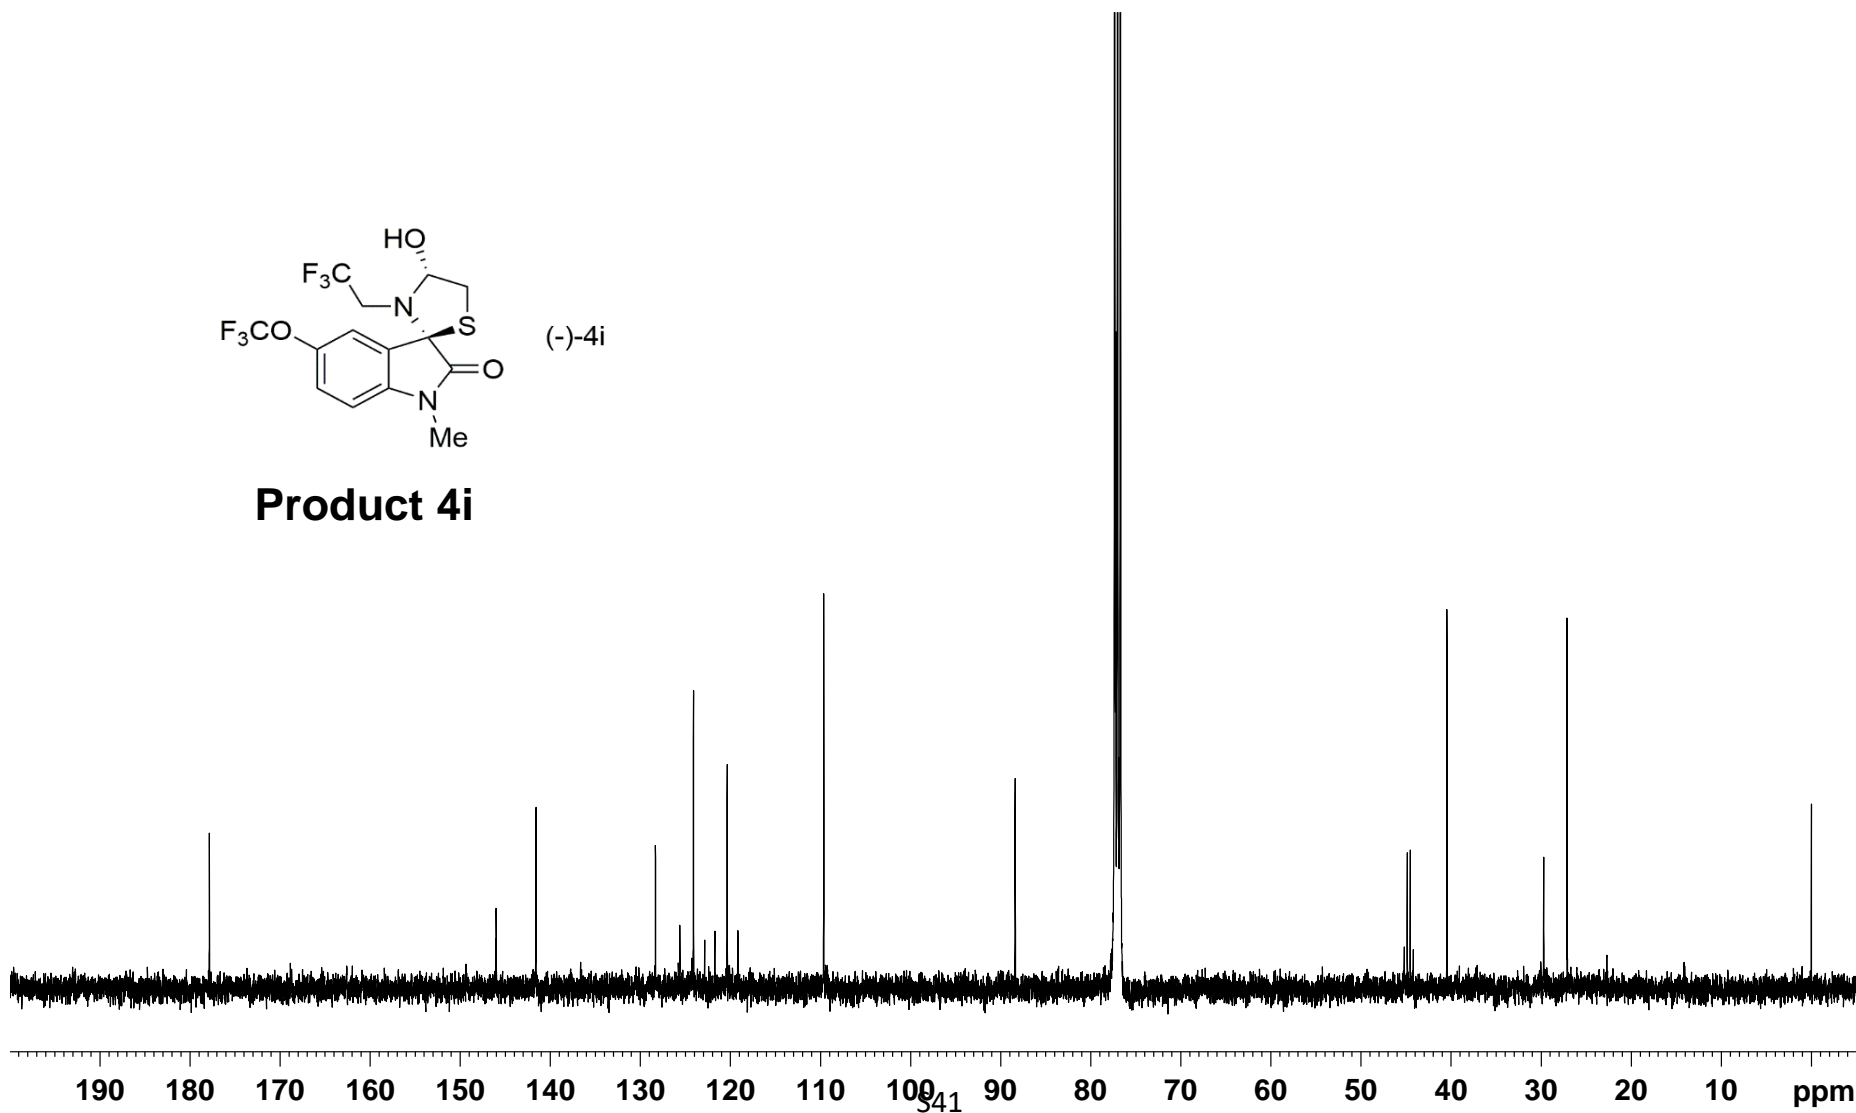

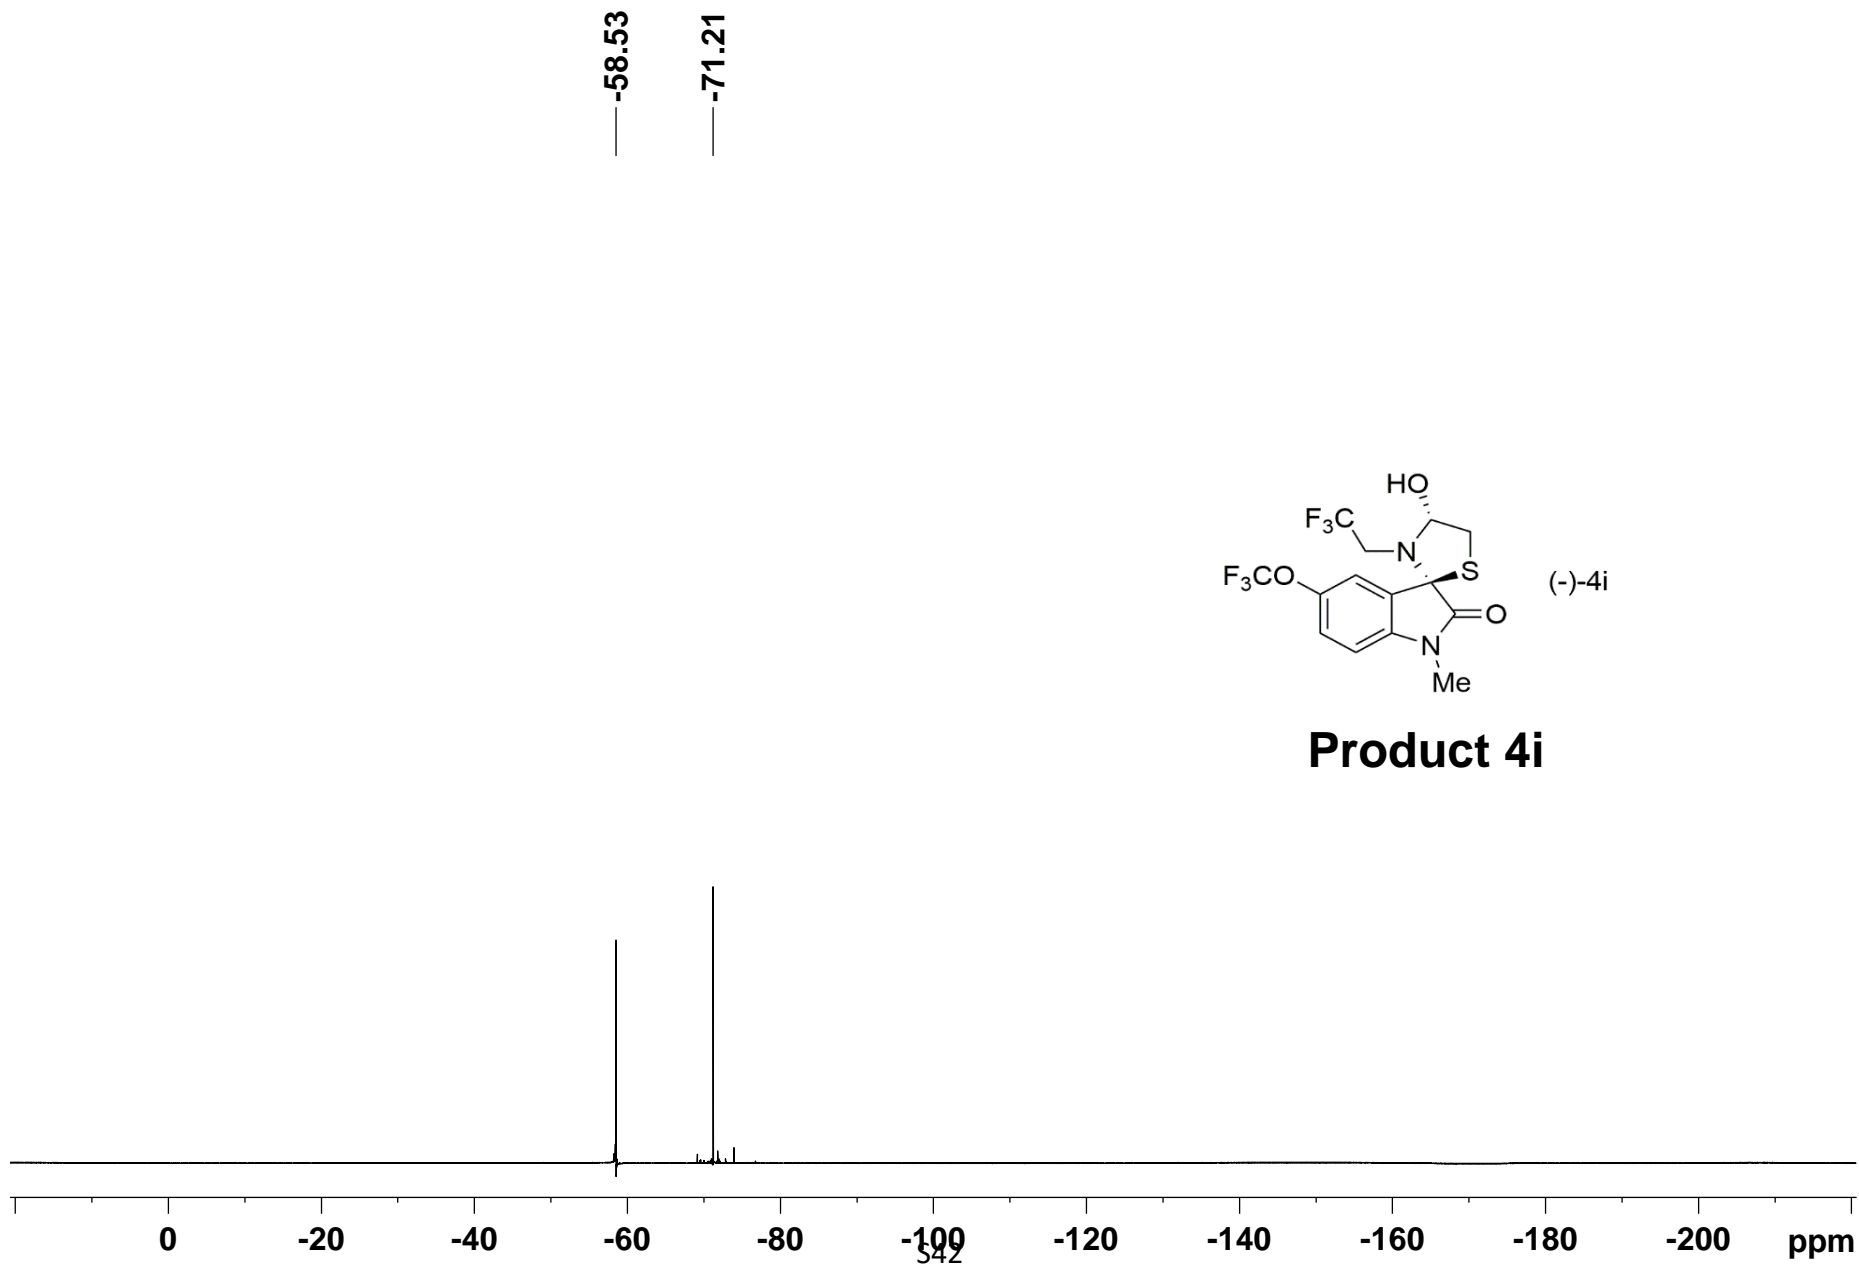

7.628  
7.624  
7.542  
7.539  
7.260

5.456  
5.445  
5.426  
5.415  
5.313  
5.283  
3.805  
3.783  
3.762  
3.750  
3.745  
3.740  
3.735  
3.724  
3.702  
3.588  
3.371  
3.345  
2.447  
2.424  
2.408  
2.400  
2.385  
2.377  
2.362  
2.339  
1.590  
1.250  
0.876

0.065  
-0.005

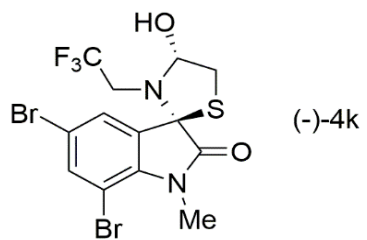

Product 4k

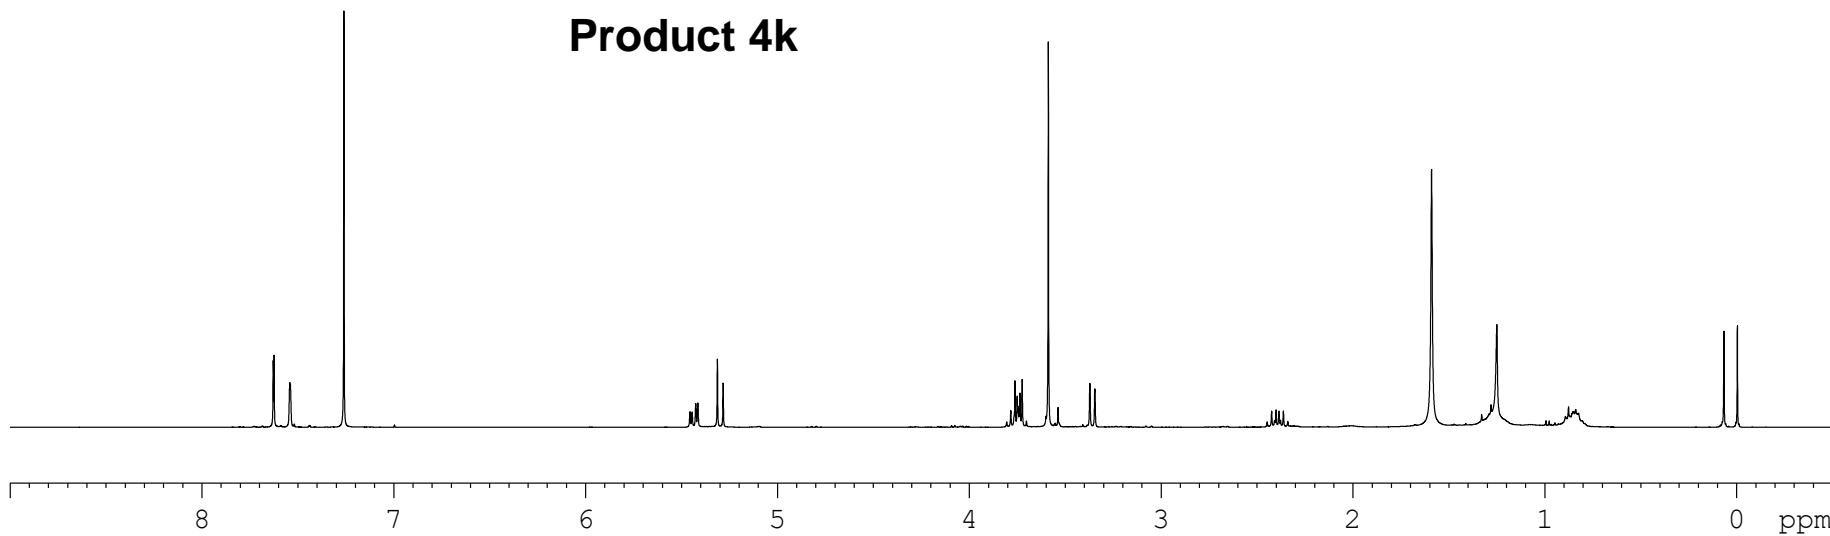

0.949  
0.937

1.003  
0.998

S43

2.022  
3.000  
1.014

1.048

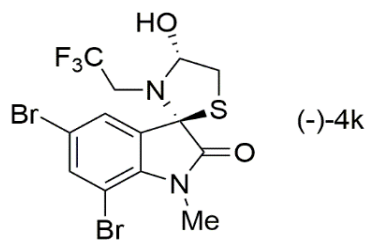

**Product 4k**

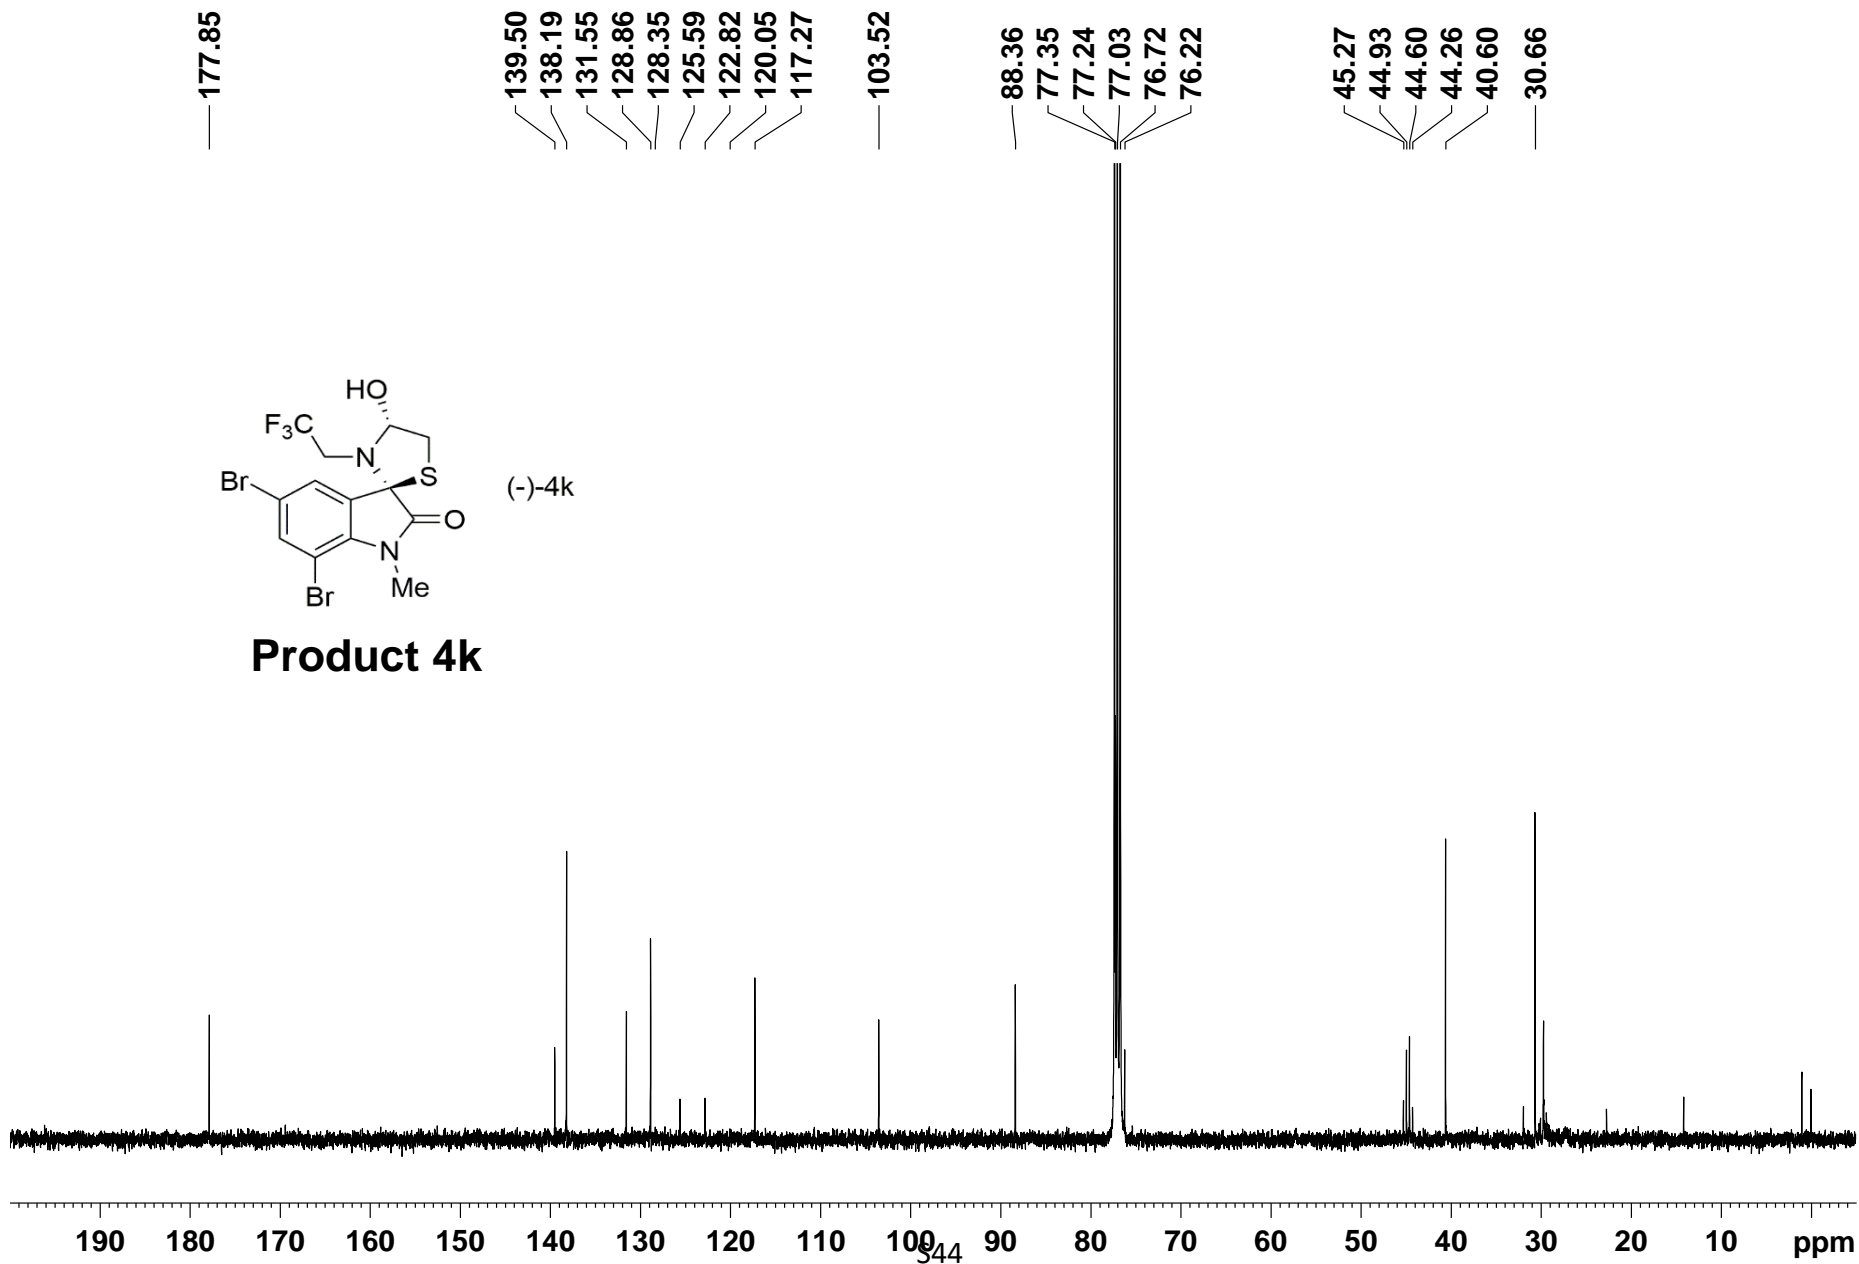

— -70.87

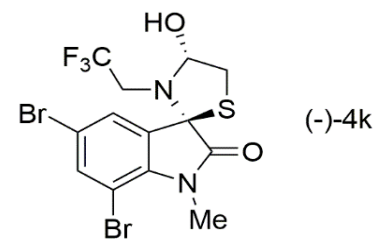

**Product 4k**

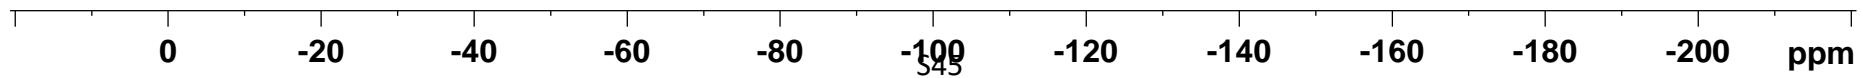

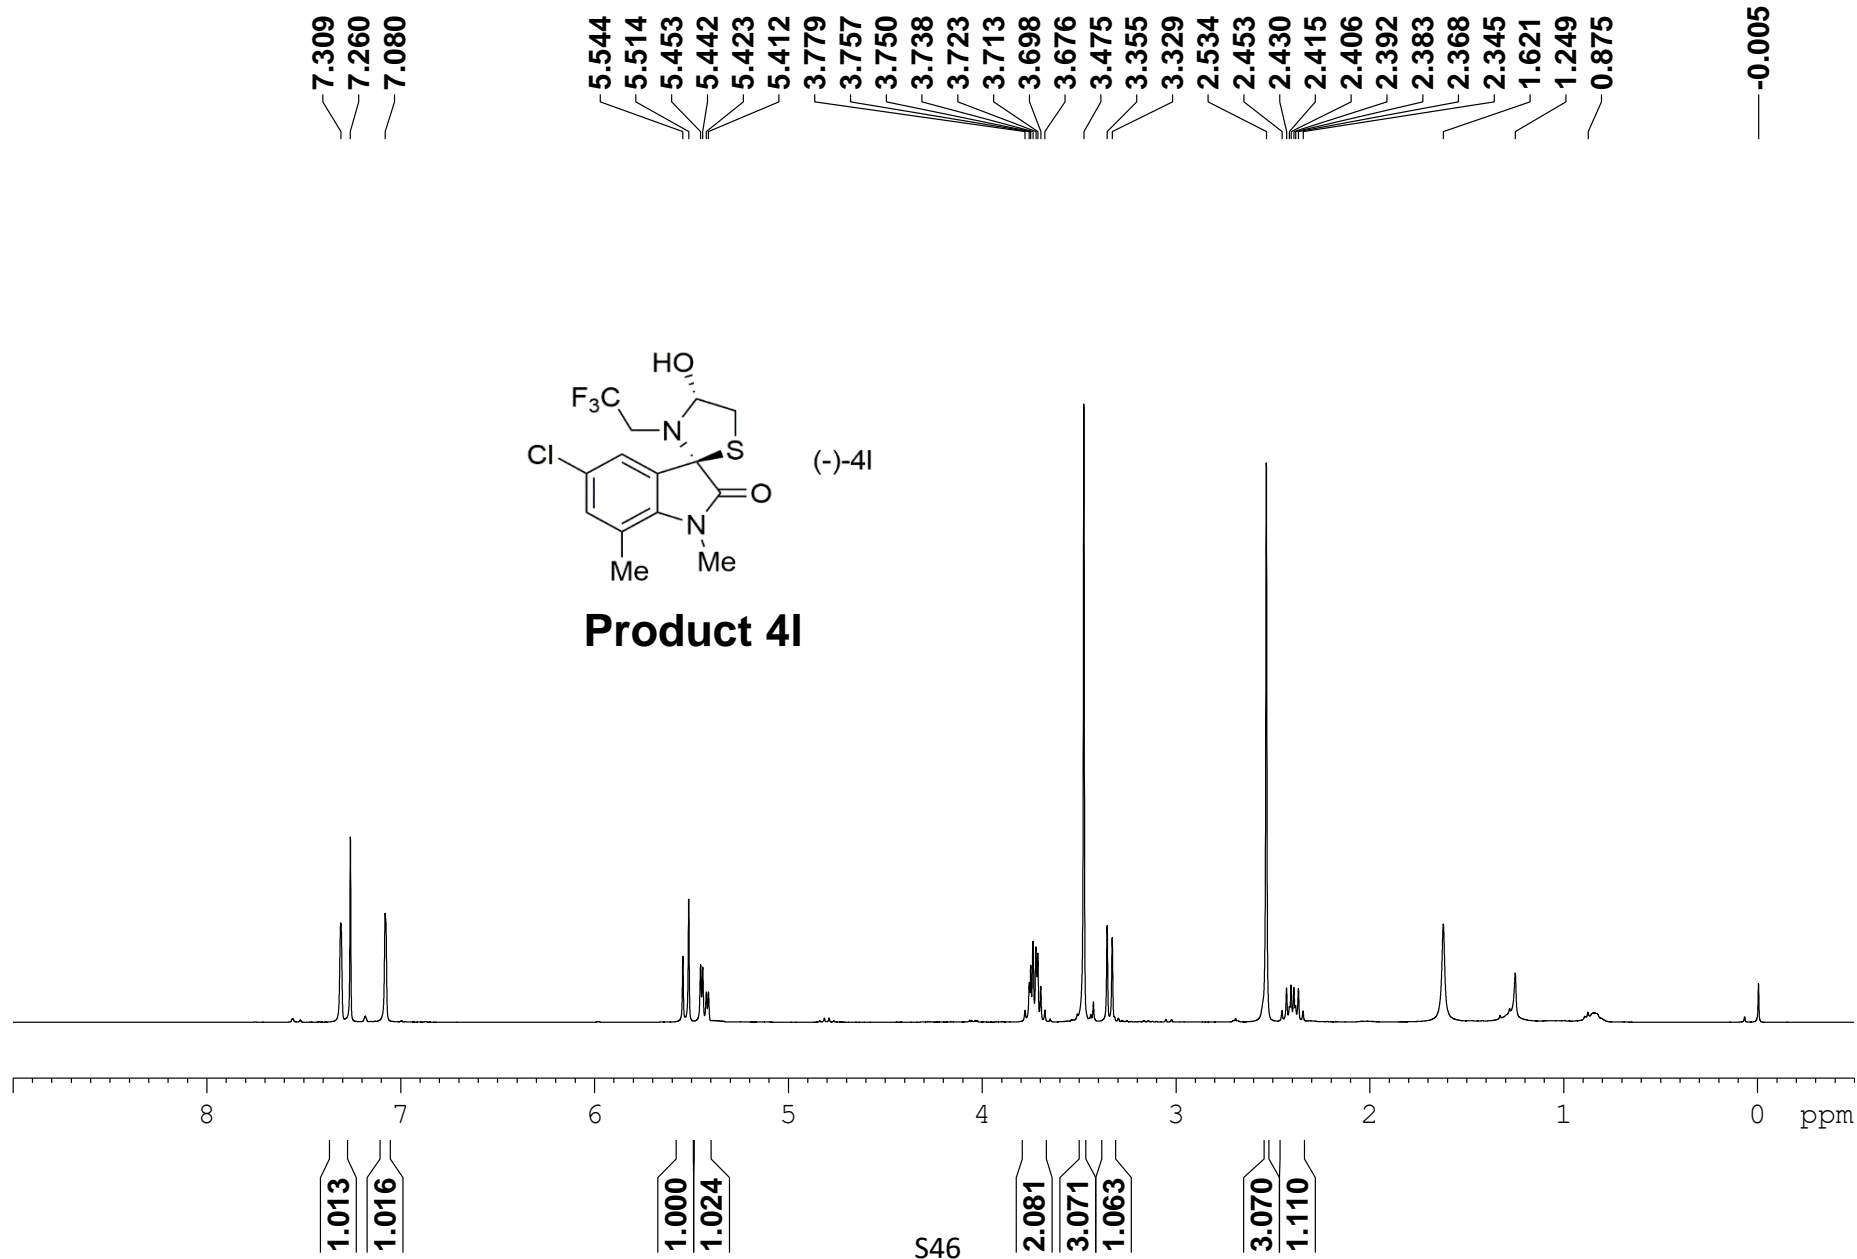

— 178.19

139.31  
134.04  
129.46  
129.05  
128.47  
125.70  
124.61  
122.93  
122.22  
120.16

— 88.20  
77.35  
77.03  
76.72  
76.37

45.13  
44.79  
44.45  
44.12  
40.49  
— 30.40

— 18.63

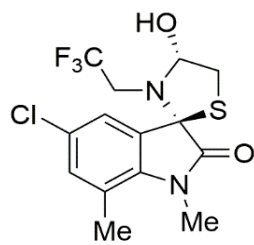

(-)-4I

**Product 4I**

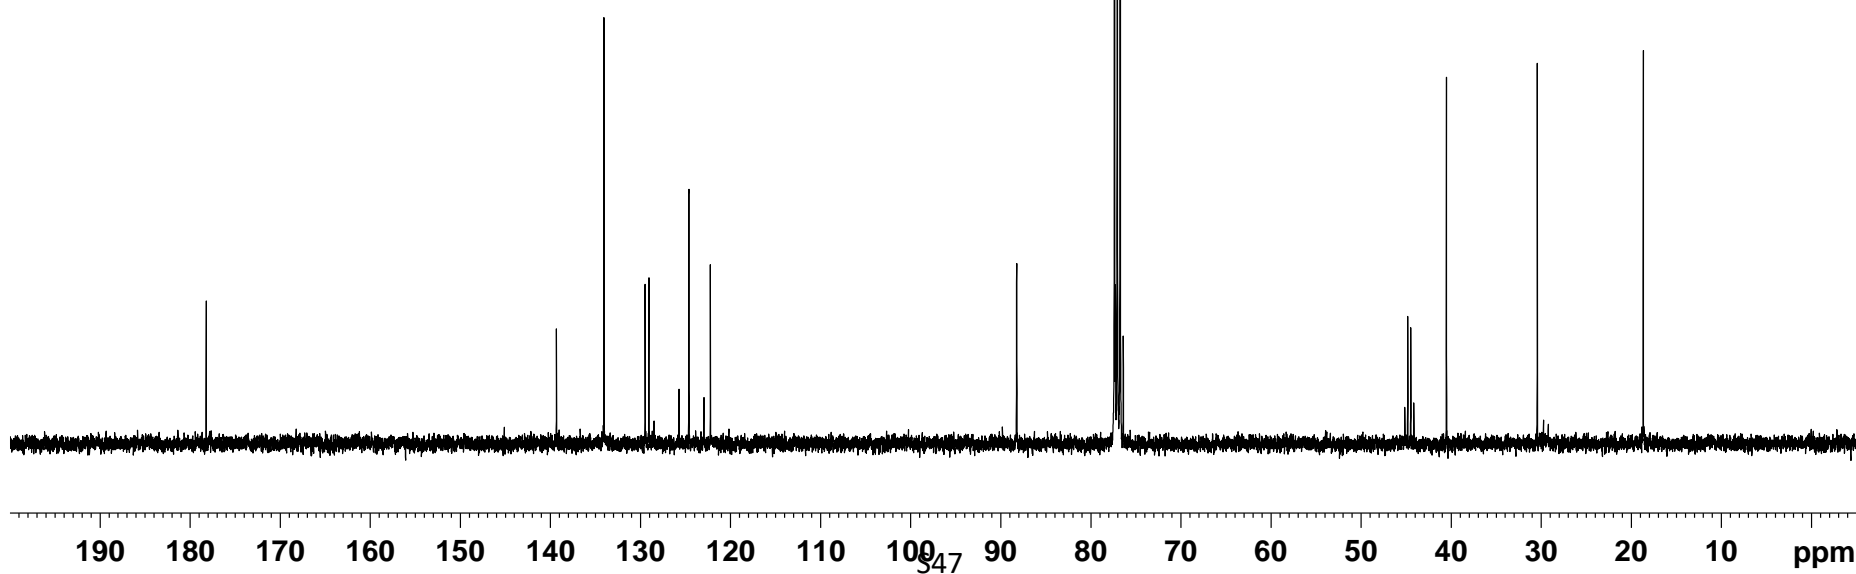

— -70.85

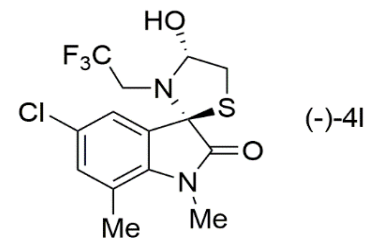

**Product 4I**

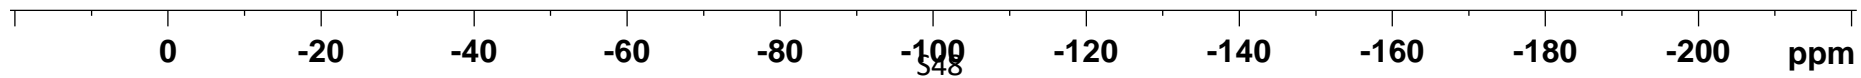



8.592  
7.487  
7.469  
7.338  
7.335  
7.319  
7.316  
7.300  
7.297  
7.264  
7.184  
7.182  
7.165  
7.163  
7.146  
7.144  
6.905  
6.886  
5.505  
5.494  
5.475  
5.464  
5.411  
5.381  
3.834  
3.813  
3.793  
3.781  
3.775  
3.767  
3.755  
3.732  
3.379  
3.352  
2.604  
2.581  
2.566  
2.557  
2.543  
2.534  
2.519  
2.496  
1.770  
1.256  
0.880

-0.000

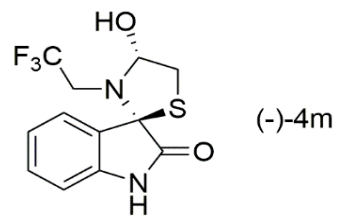

**Product 4m**

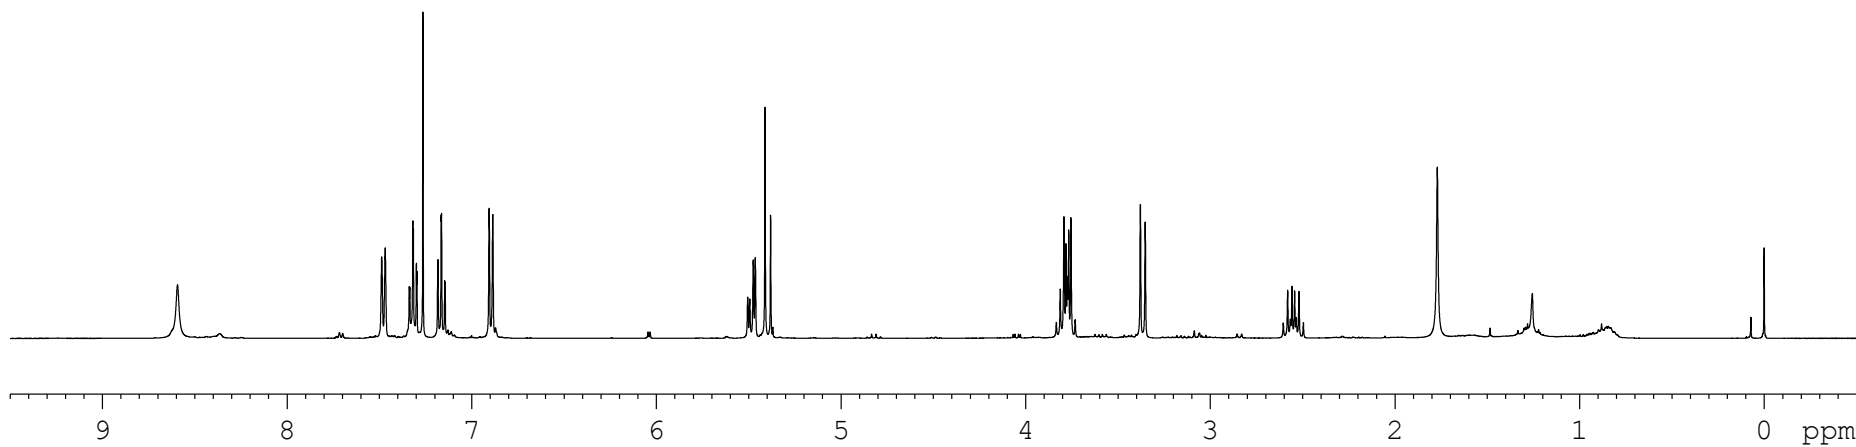

1.000

1.006  
1.119  
1.079  
1.106

1.020  
1.069

S49

2.111  
1.025

1.060

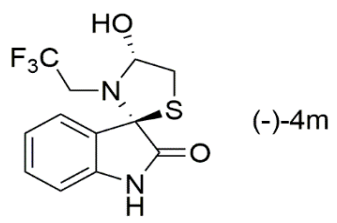

**Product 4m**

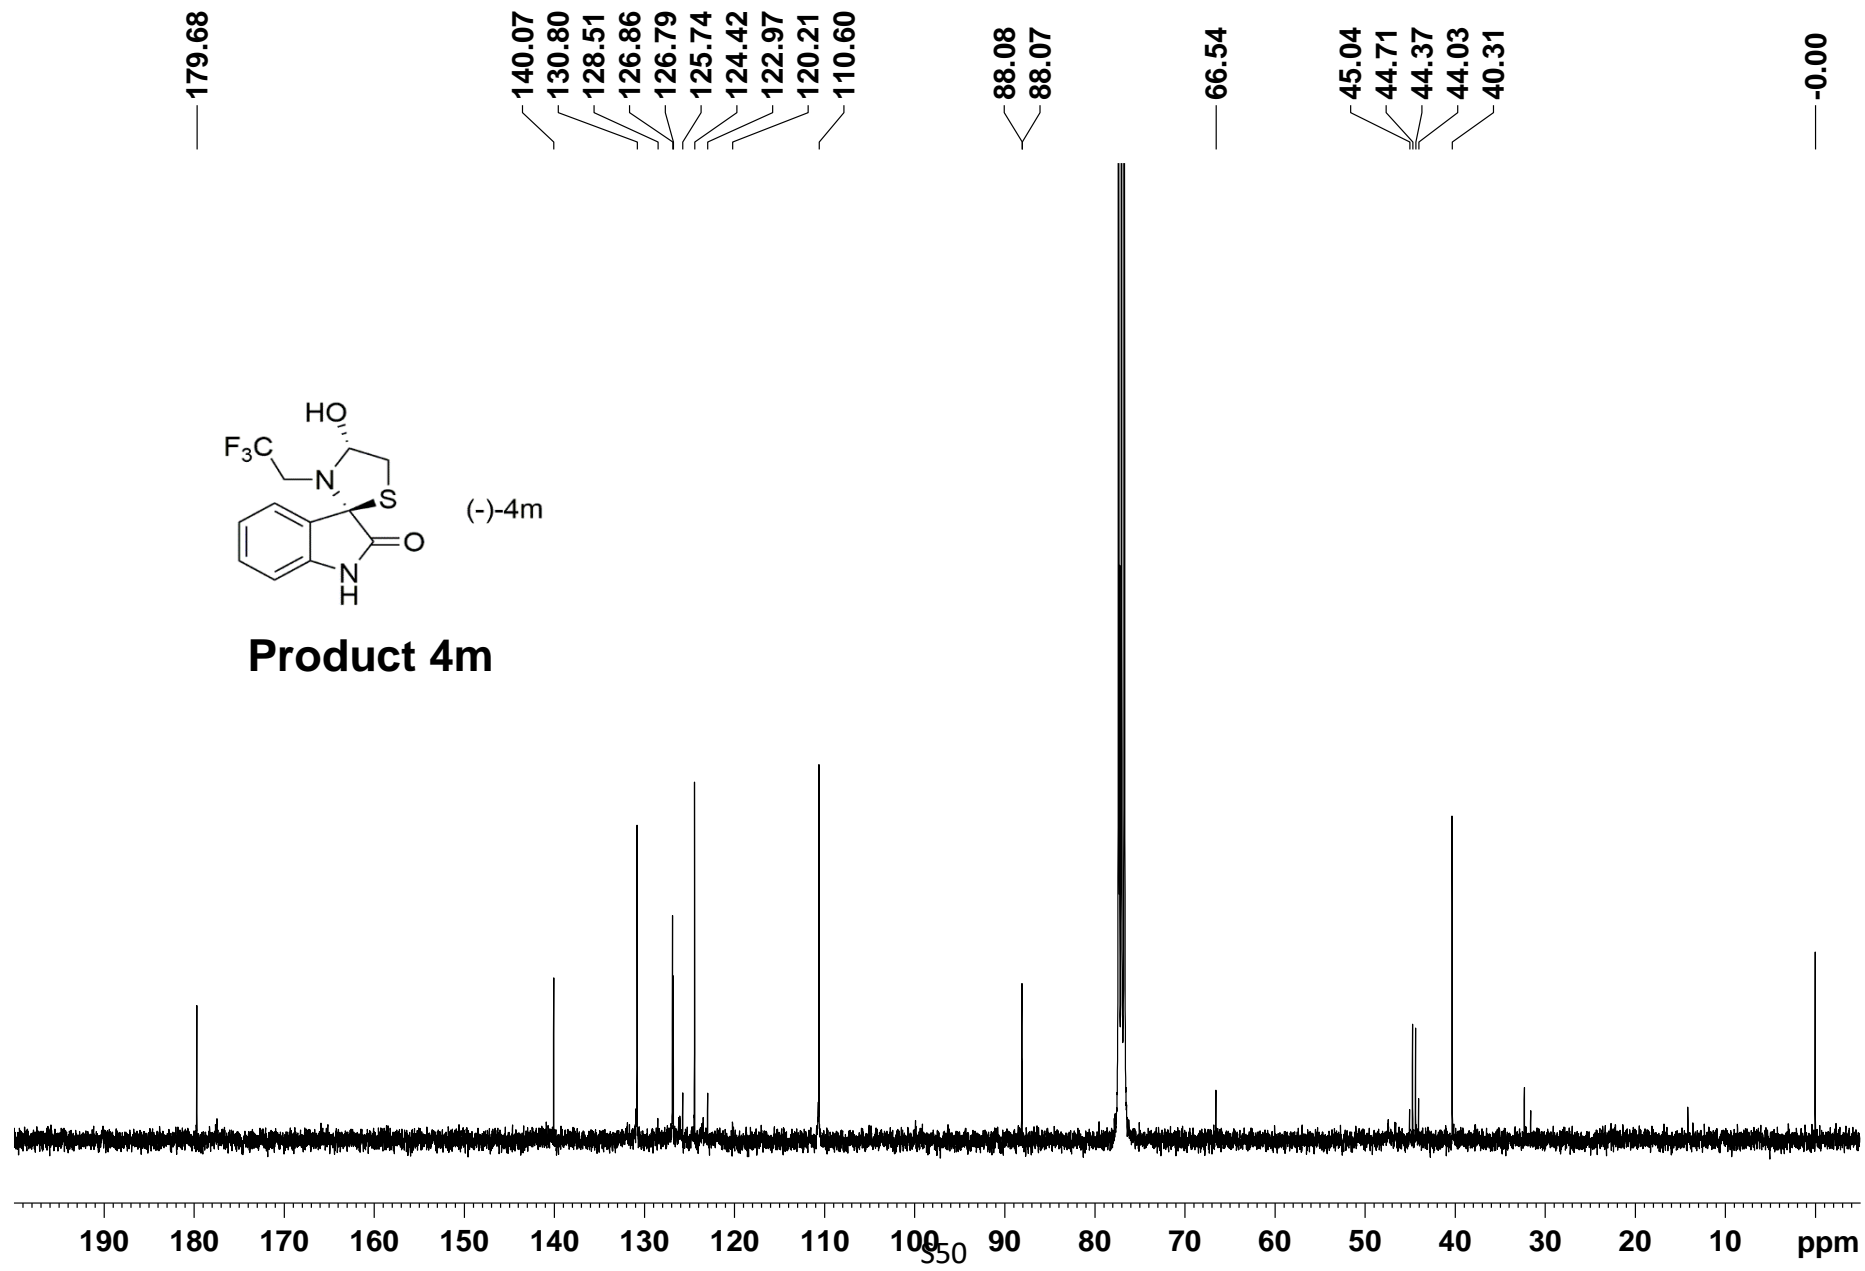

-70.87

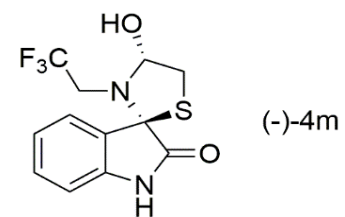

**Product 4m**

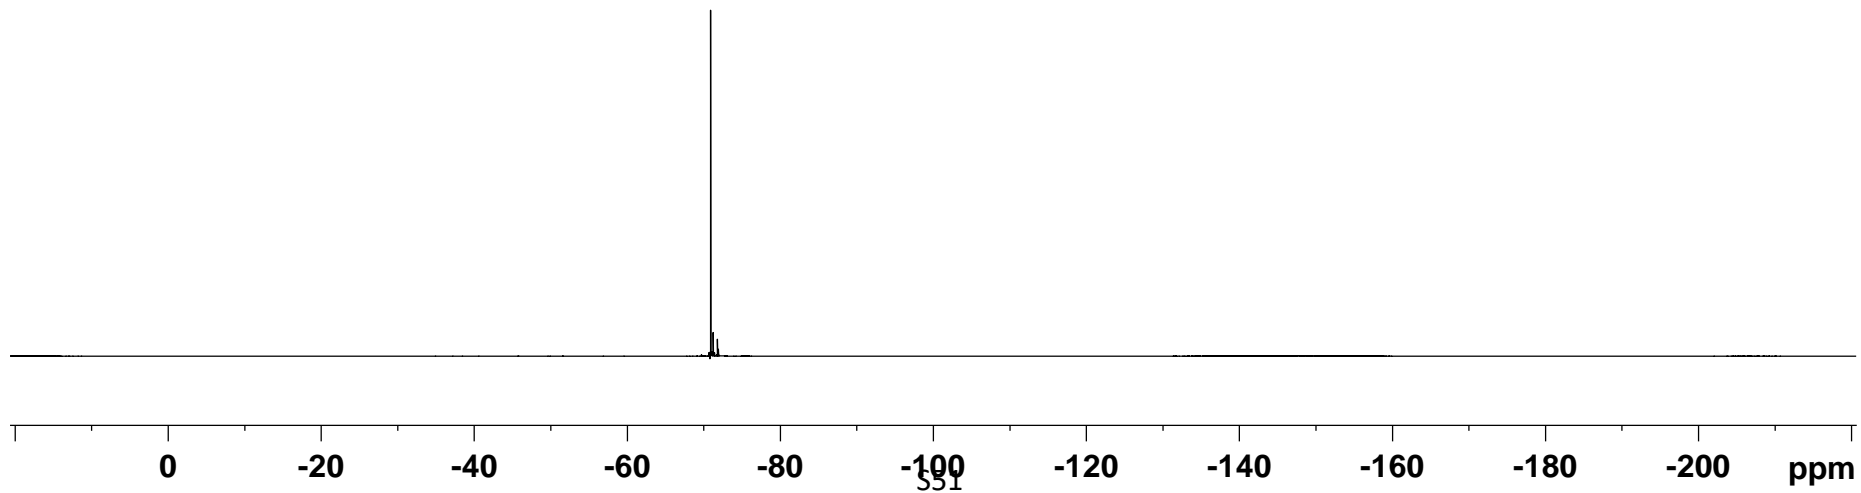

7.503  
7.485  
7.363  
7.345  
7.328  
7.307  
7.294  
7.274  
7.253  
7.231  
7.153  
7.135  
7.116  
6.759  
6.740  
5.642  
5.612  
5.518  
5.507  
5.488  
5.477  
4.969  
4.930  
4.852  
4.813  
3.840  
3.819  
3.802  
3.792  
3.777  
3.764  
3.739  
3.408  
3.381  
2.500  
2.477  
2.453  
2.439  
2.415  
2.392  
1.654

— -0.000

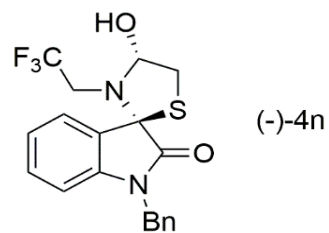

**Product 4n**

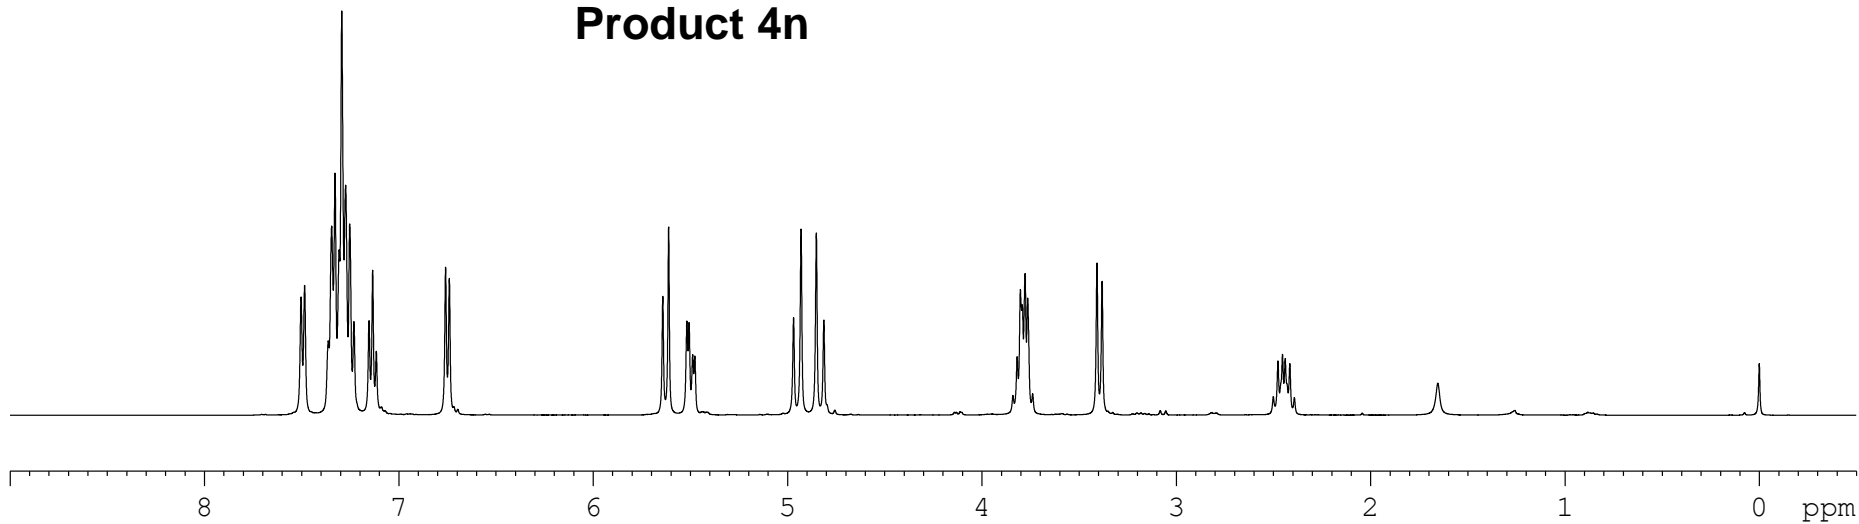

1.005  
6.375  
1.048  
1.037  
1.003  
1.012  
1.039  
1.022  
S52  
1.998  
0.996  
1.000

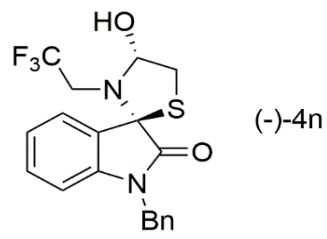

**Product 4n**

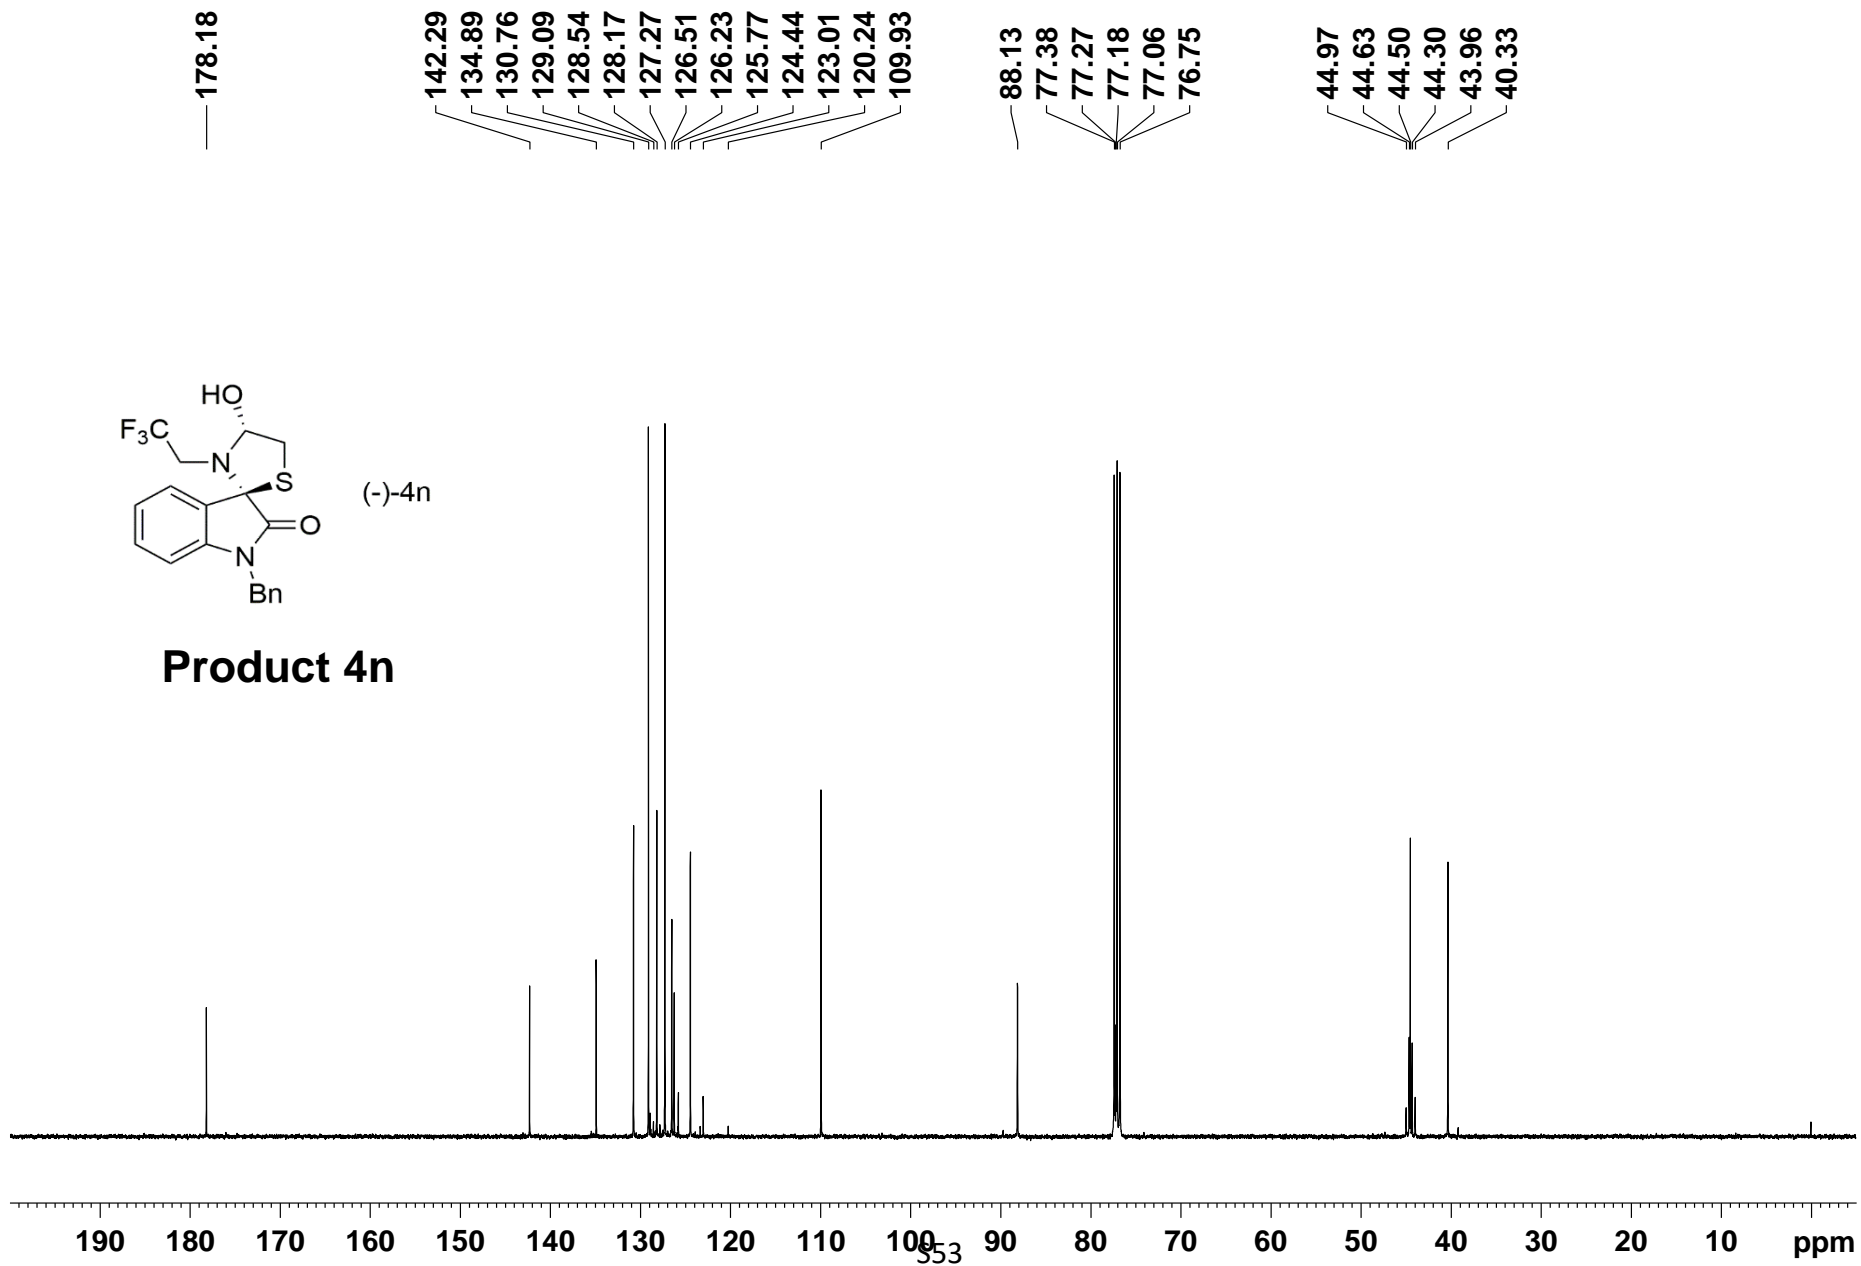

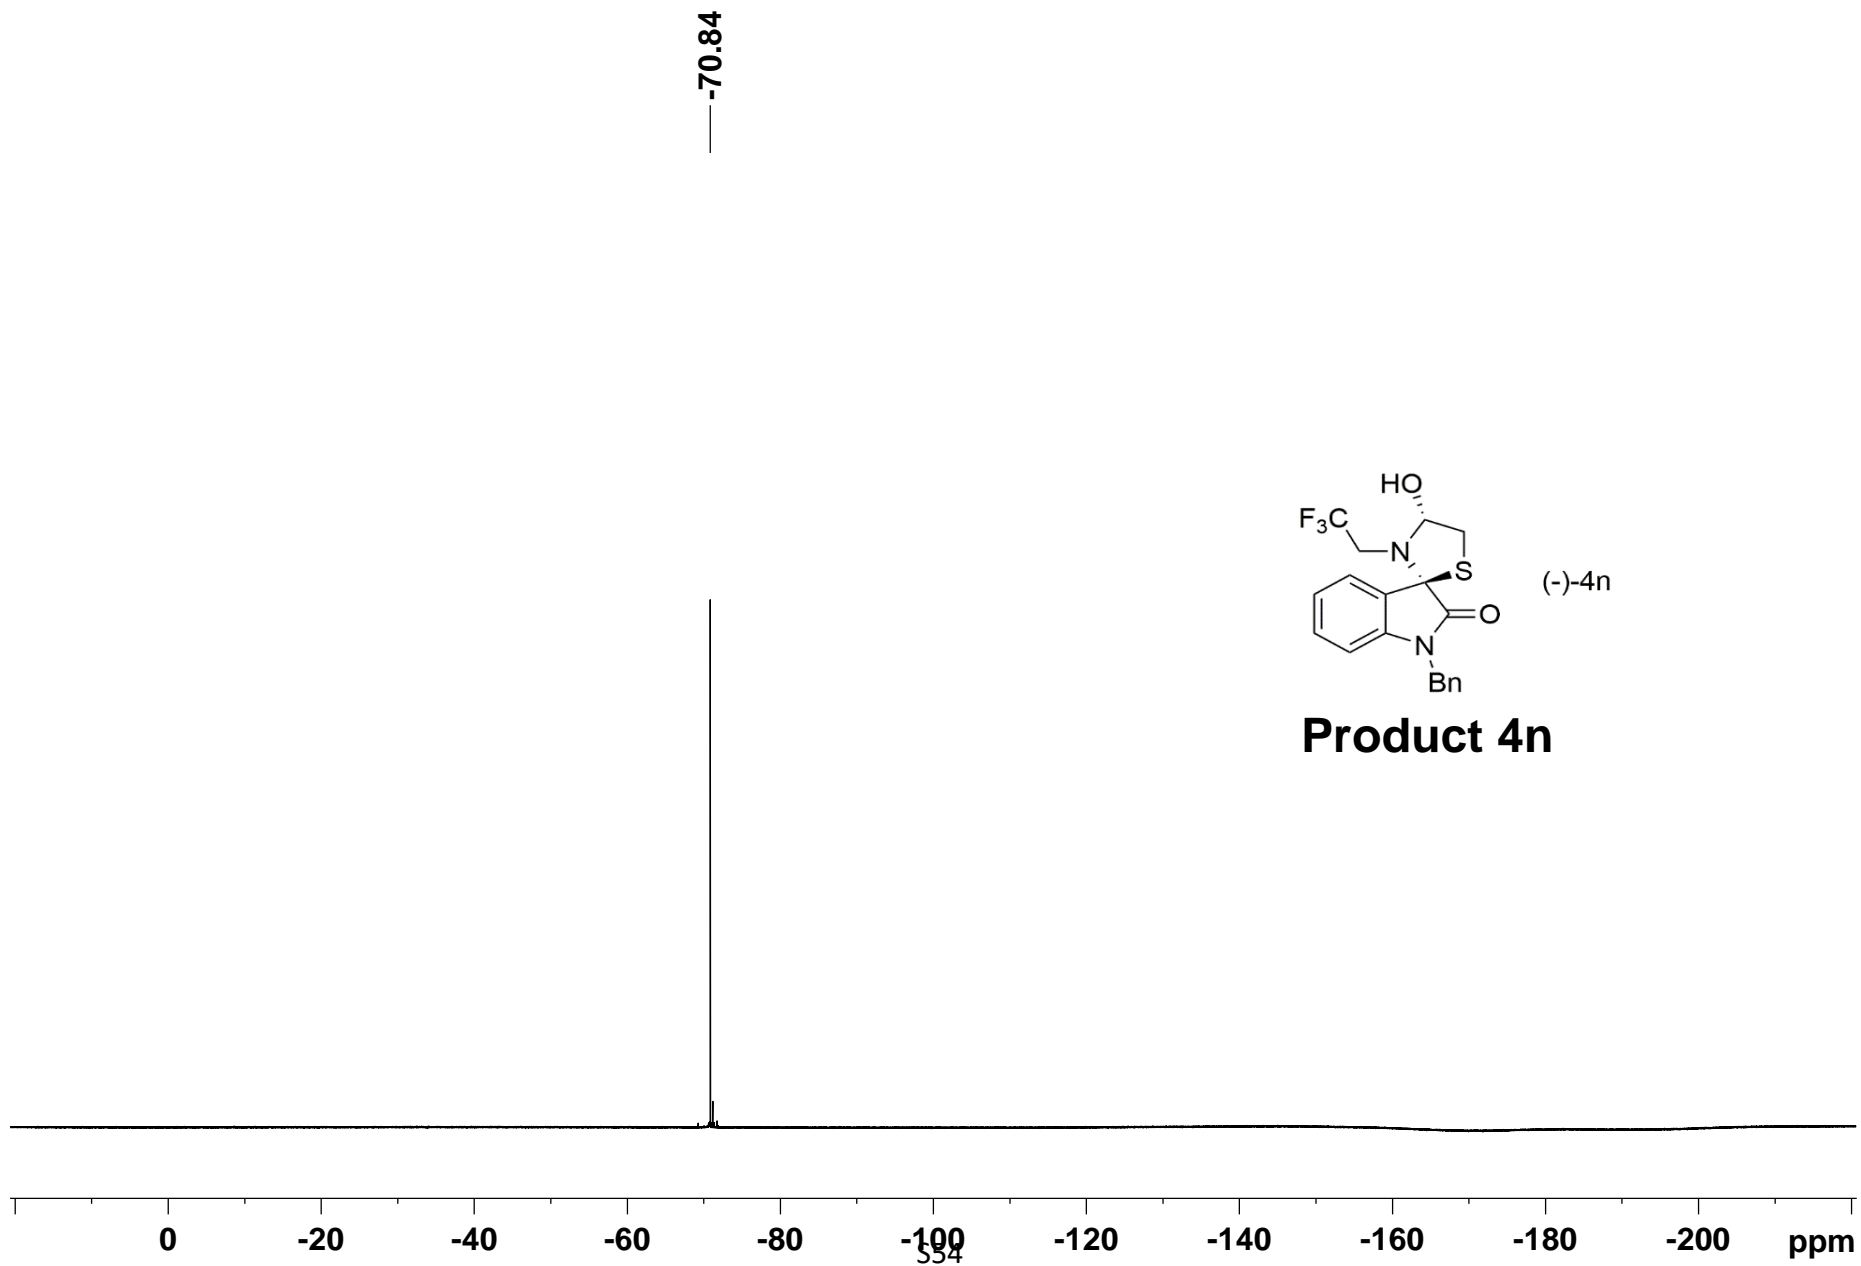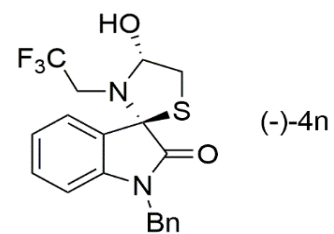

**Product 4n**

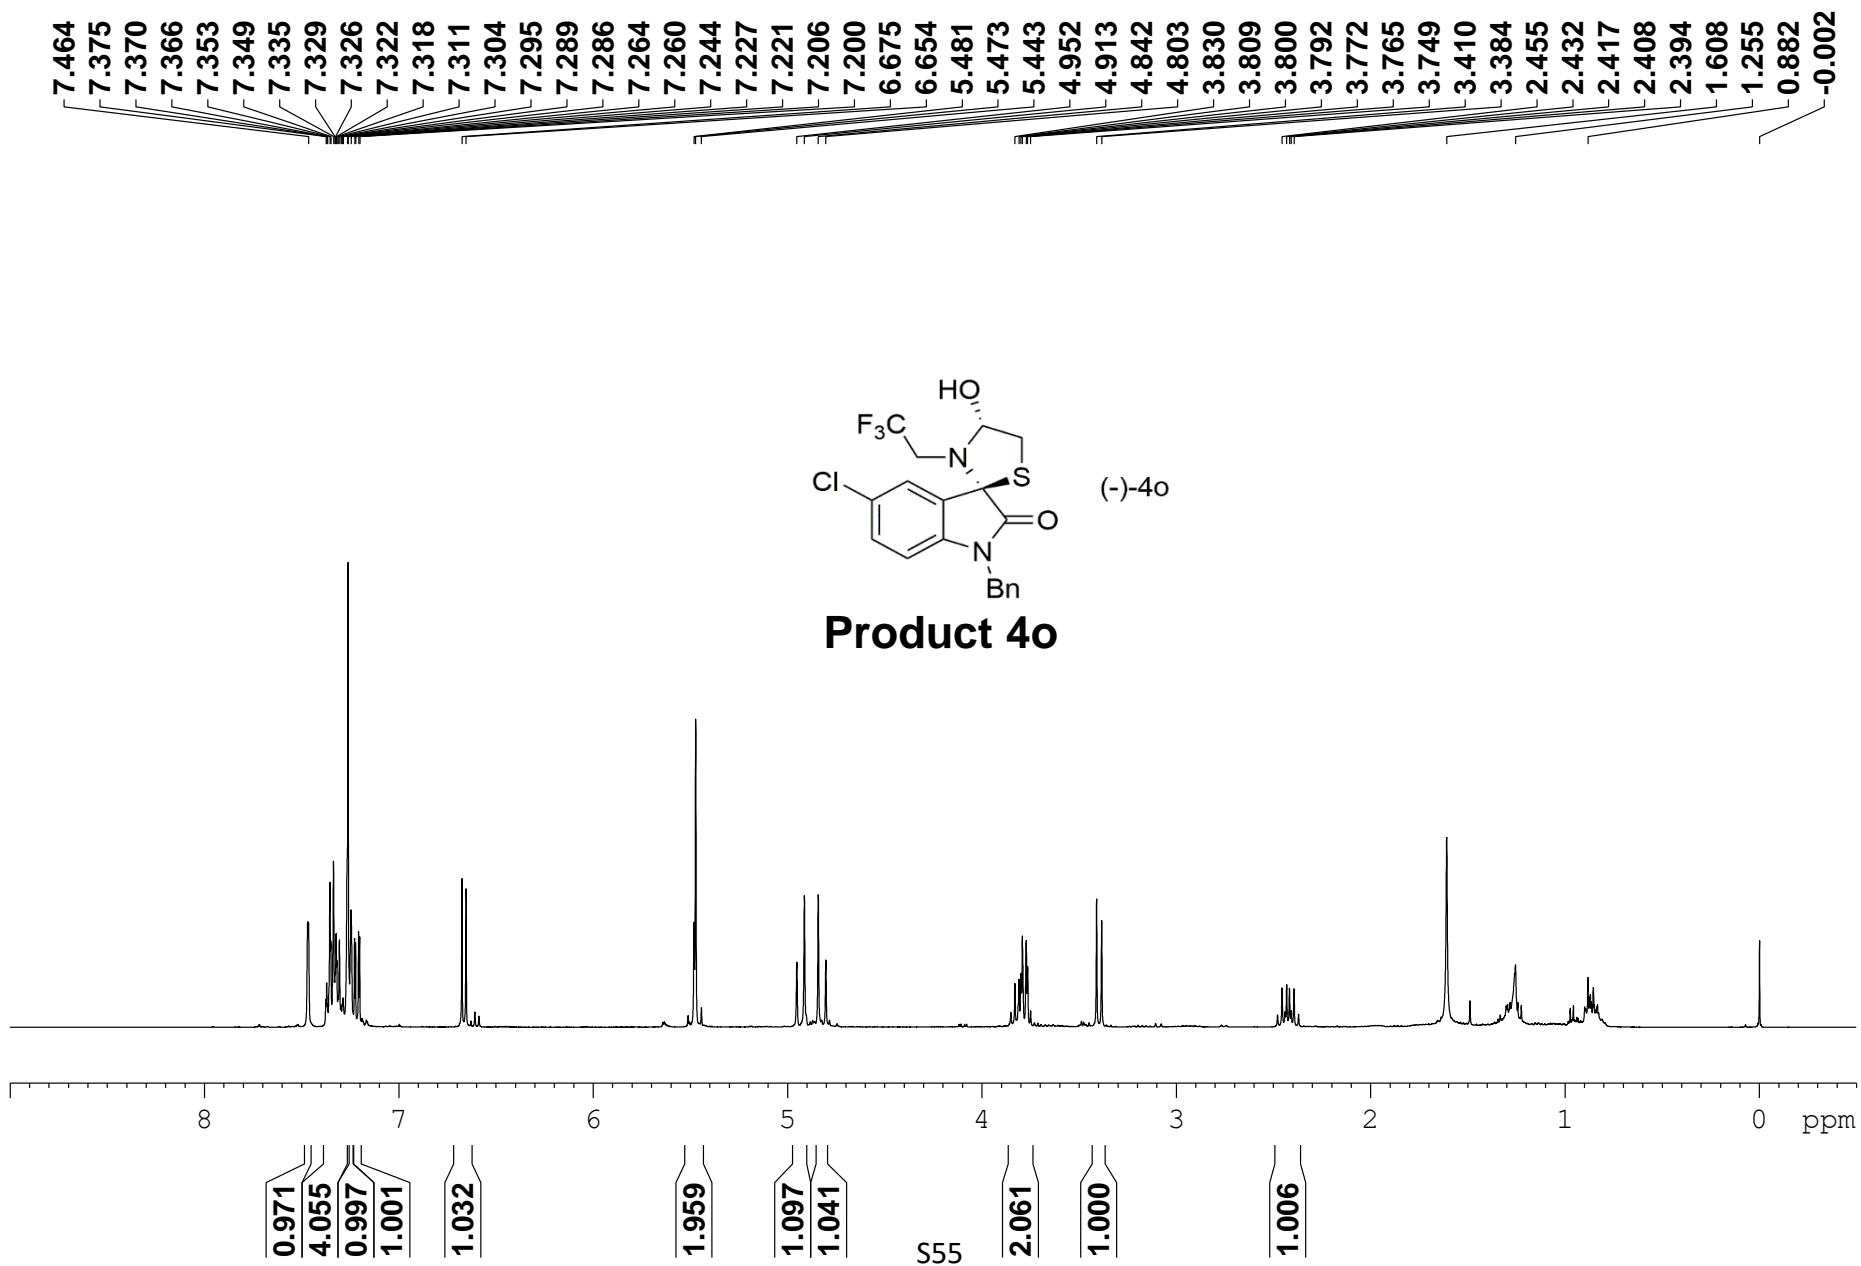

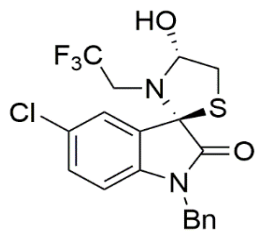

(-)-4o

**Product 4o**

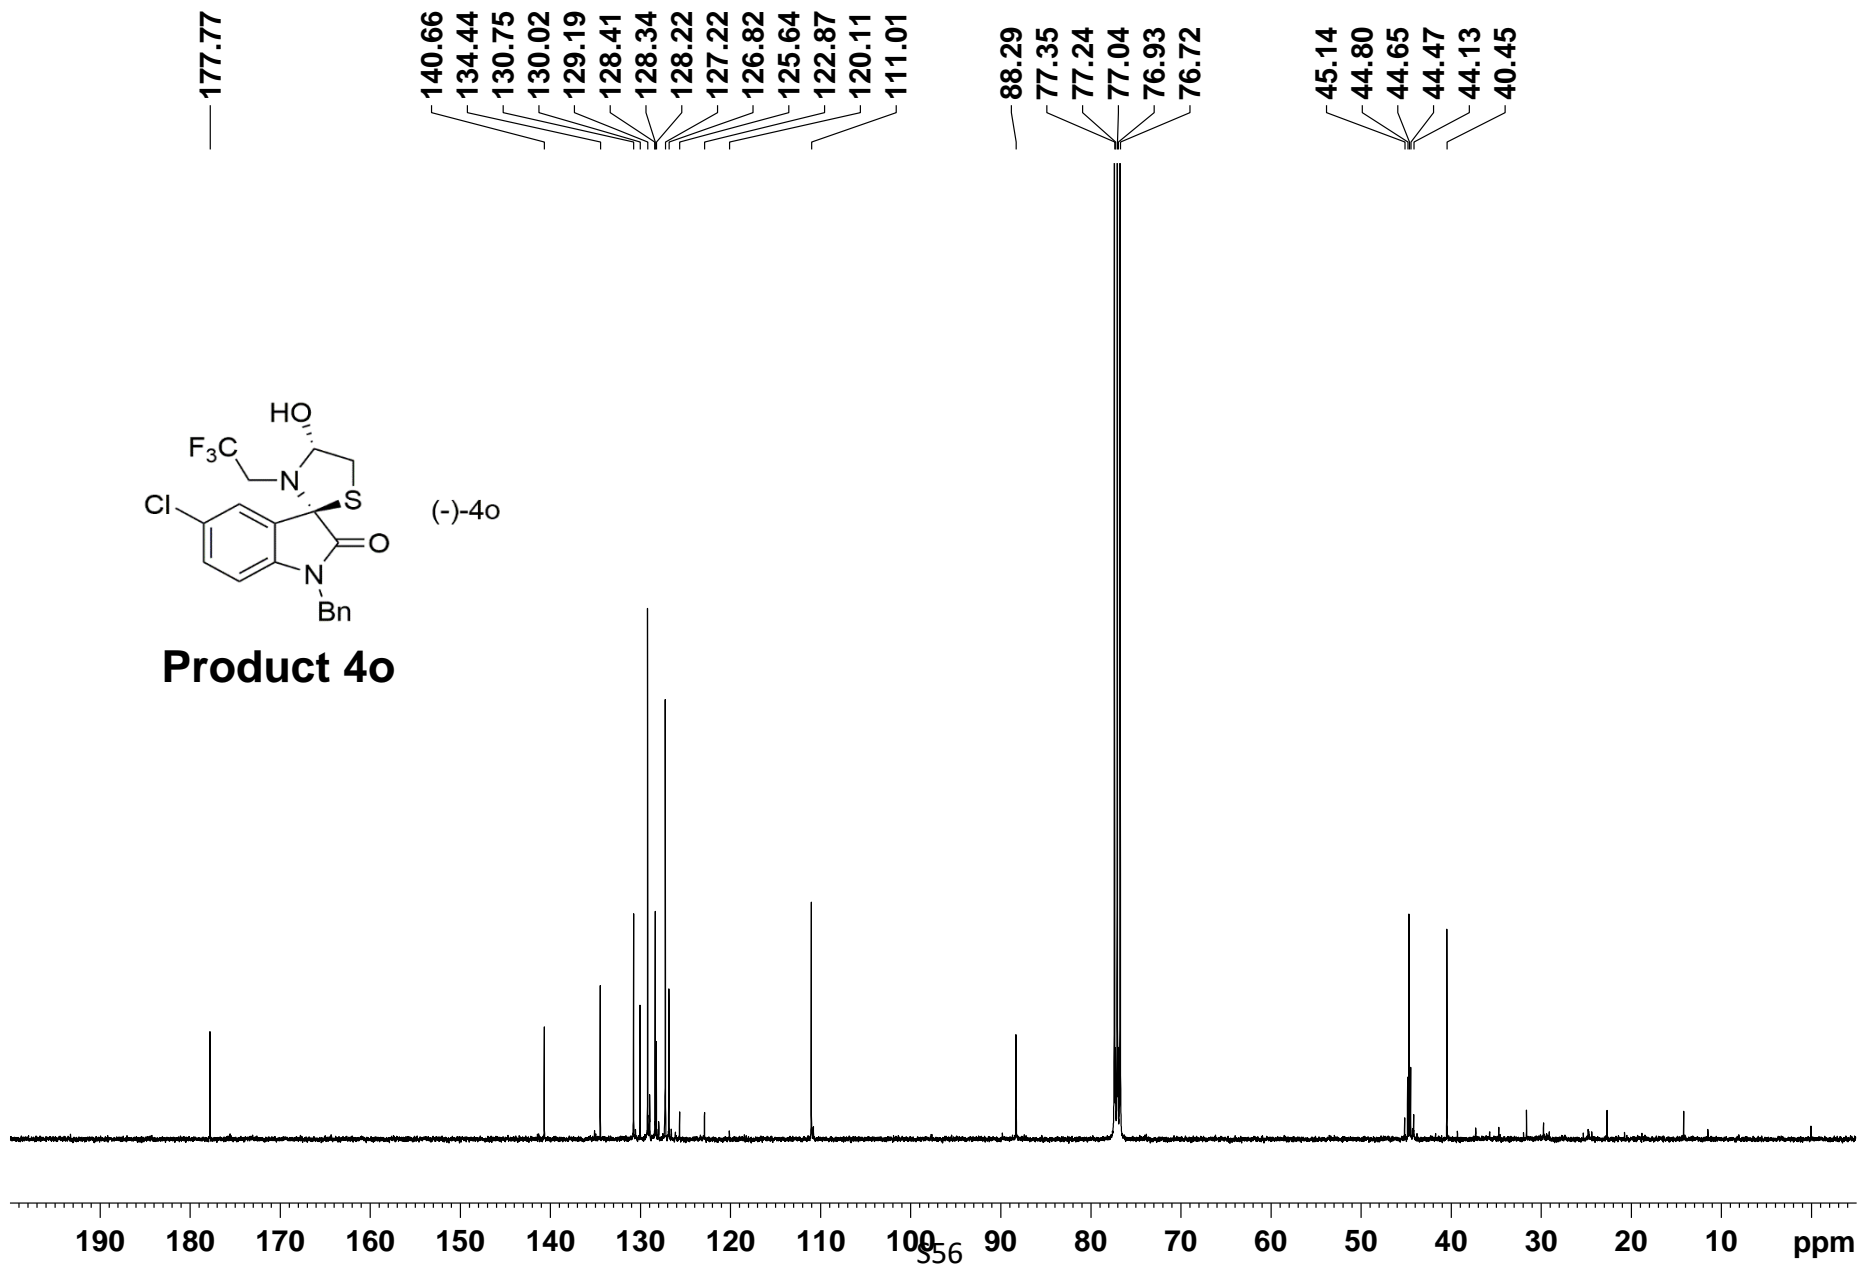



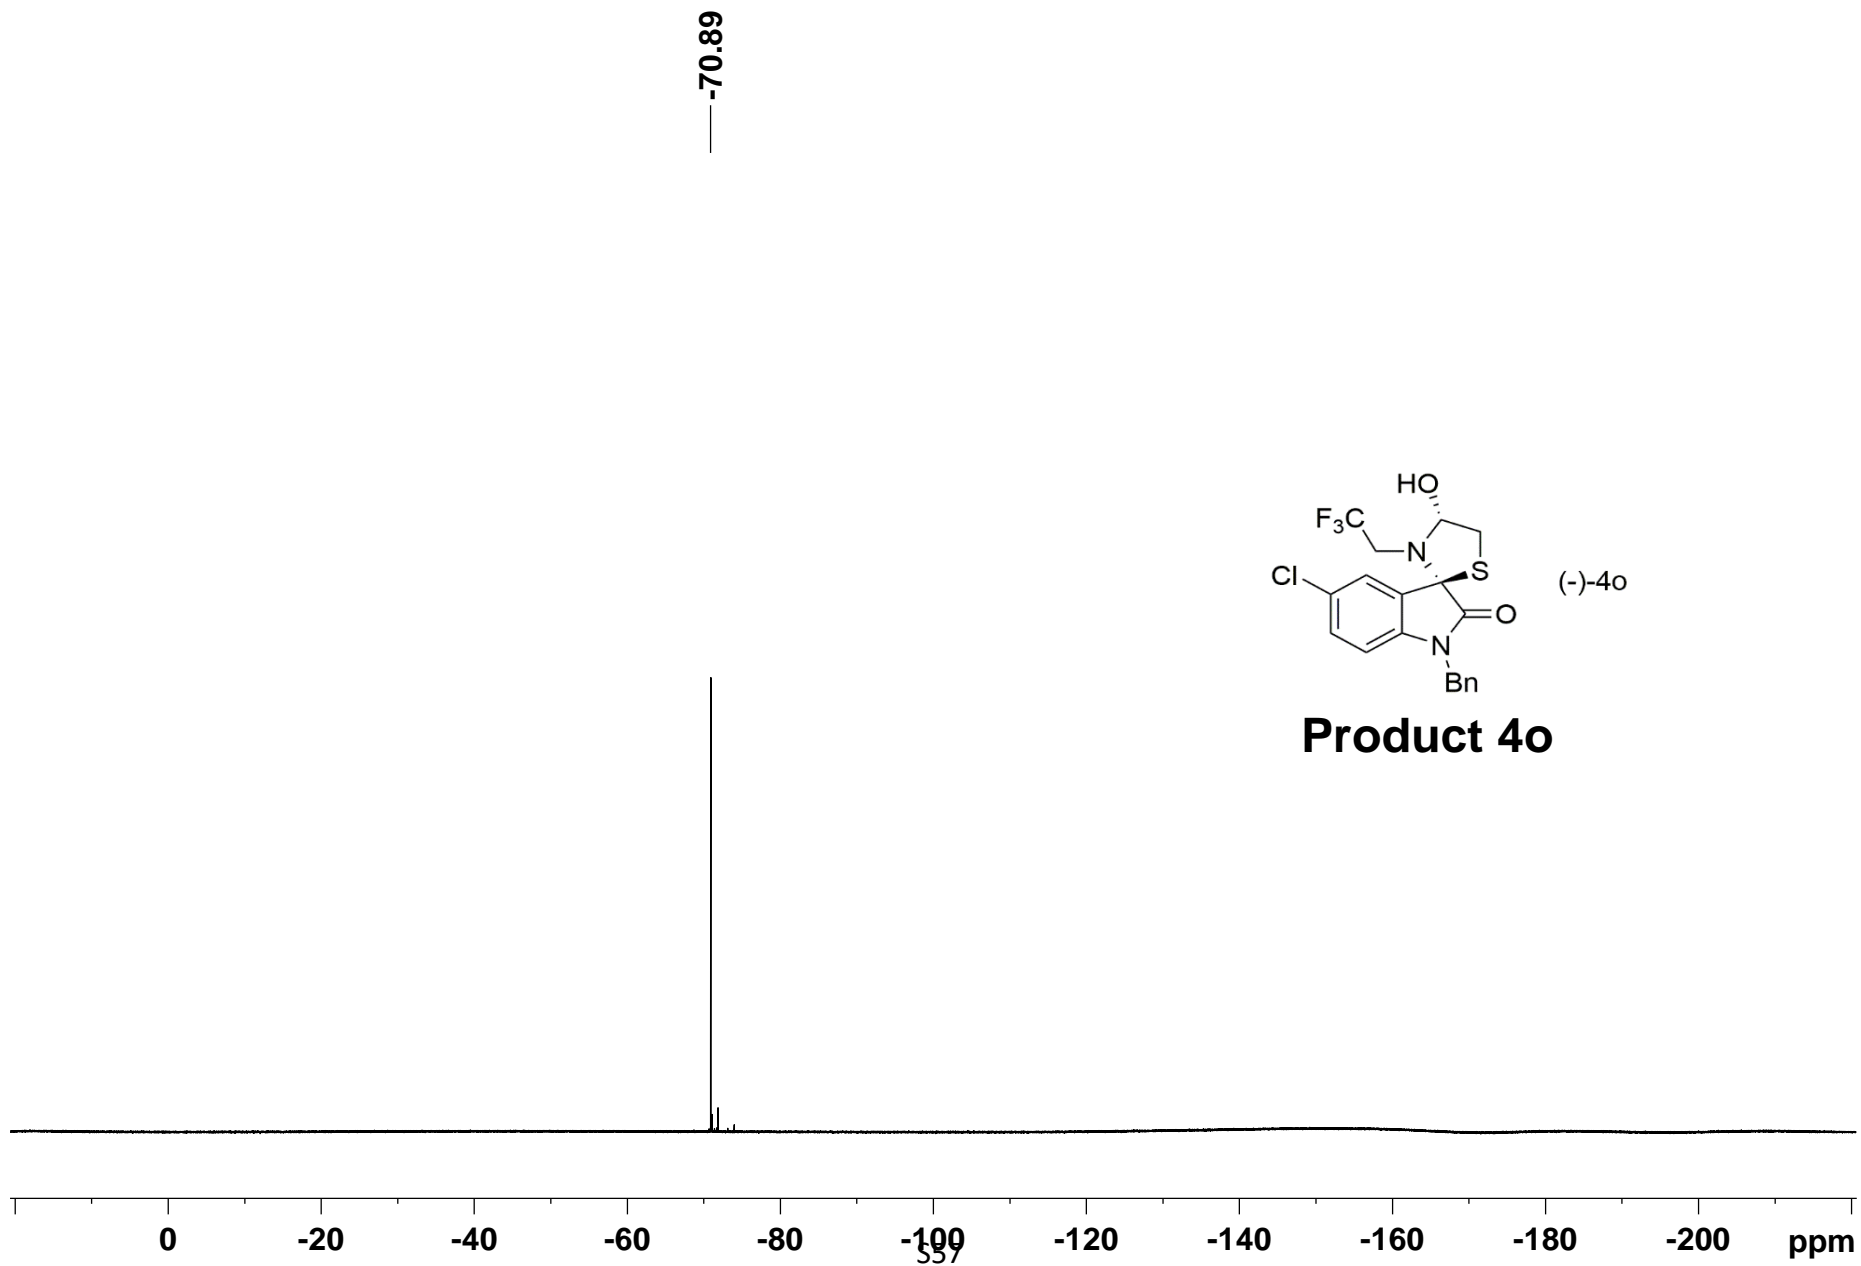

7.606  
7.370  
7.350  
7.332  
7.318  
7.301  
7.282  
7.259  
7.242  
6.630  
6.609

5.508  
5.467  
5.437  
4.946  
4.907  
4.838  
4.799

3.850  
3.828  
3.807  
3.790  
3.769  
3.760  
3.405  
3.379

2.482  
2.458  
2.435  
2.420  
2.397  
2.374  
1.701  
1.257  
0.847  
-0.001

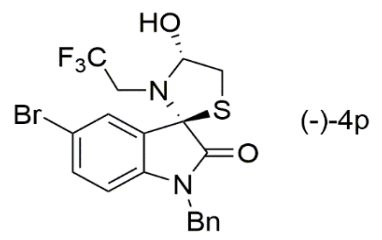

**Product 4p**

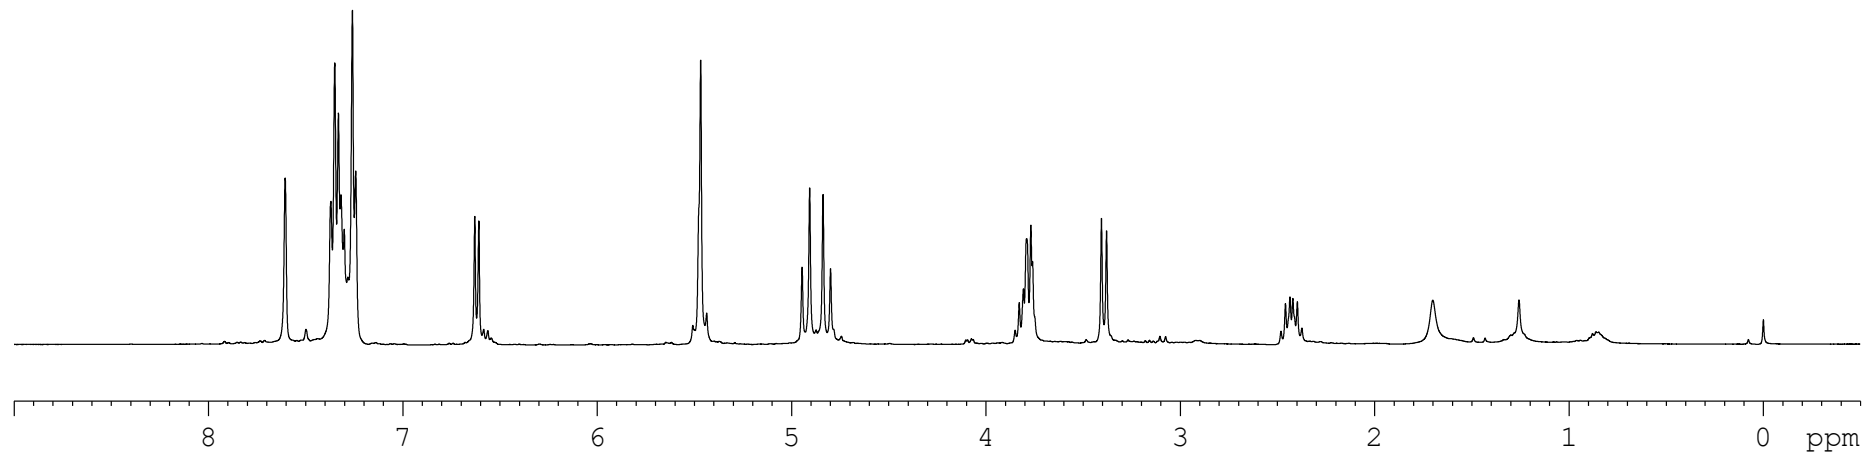

0.956  
5.033  
0.960  
1.004  
1.922  
1.089  
1.020  
S58  
1.956  
1.074  
1.000

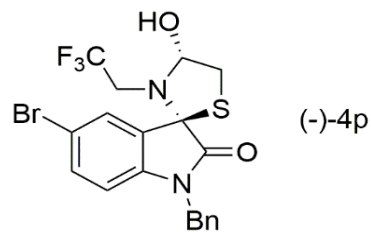

**Product 4p**

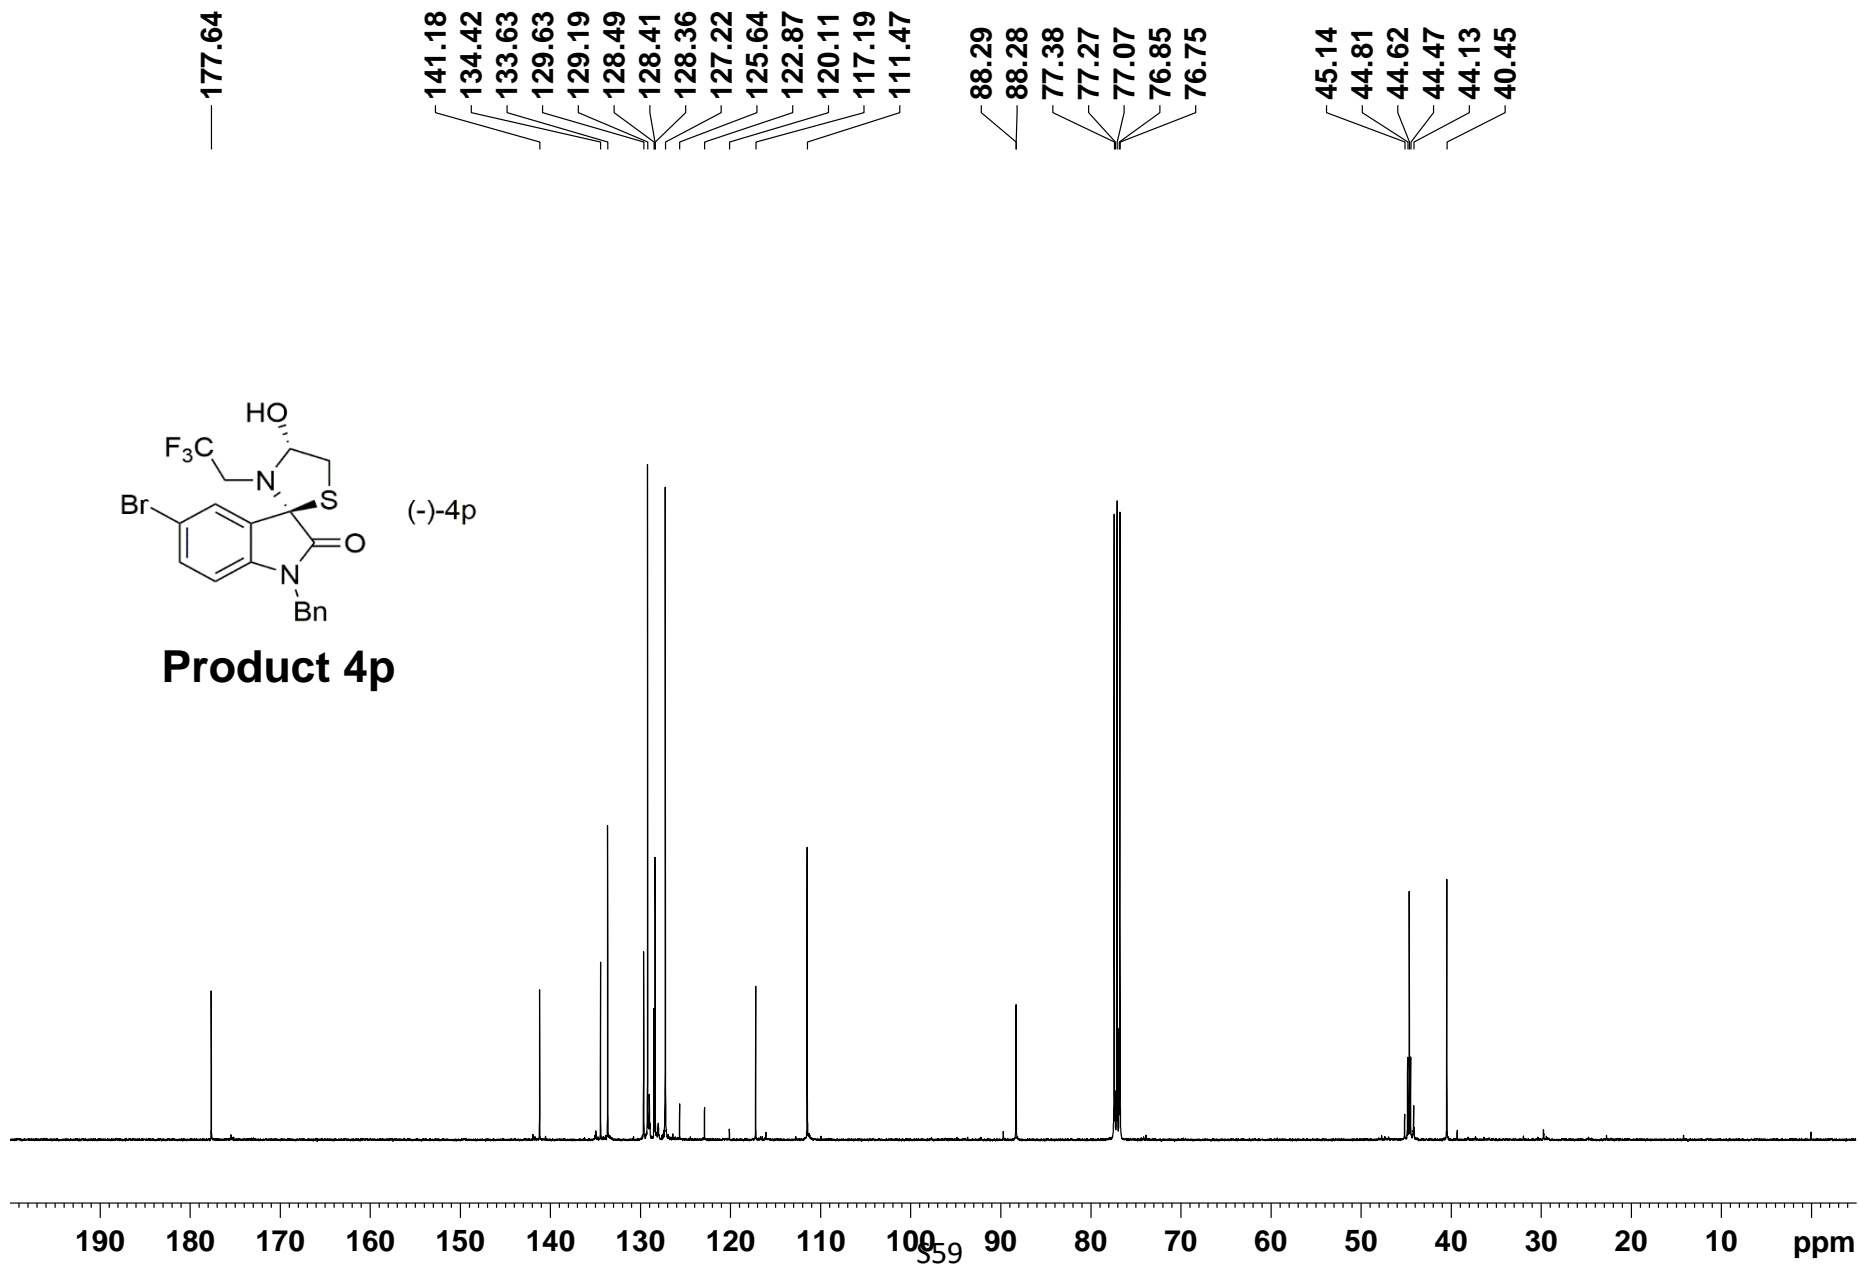

-70.89

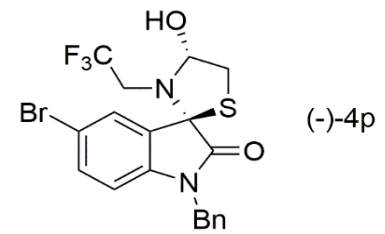

**Product 4p**

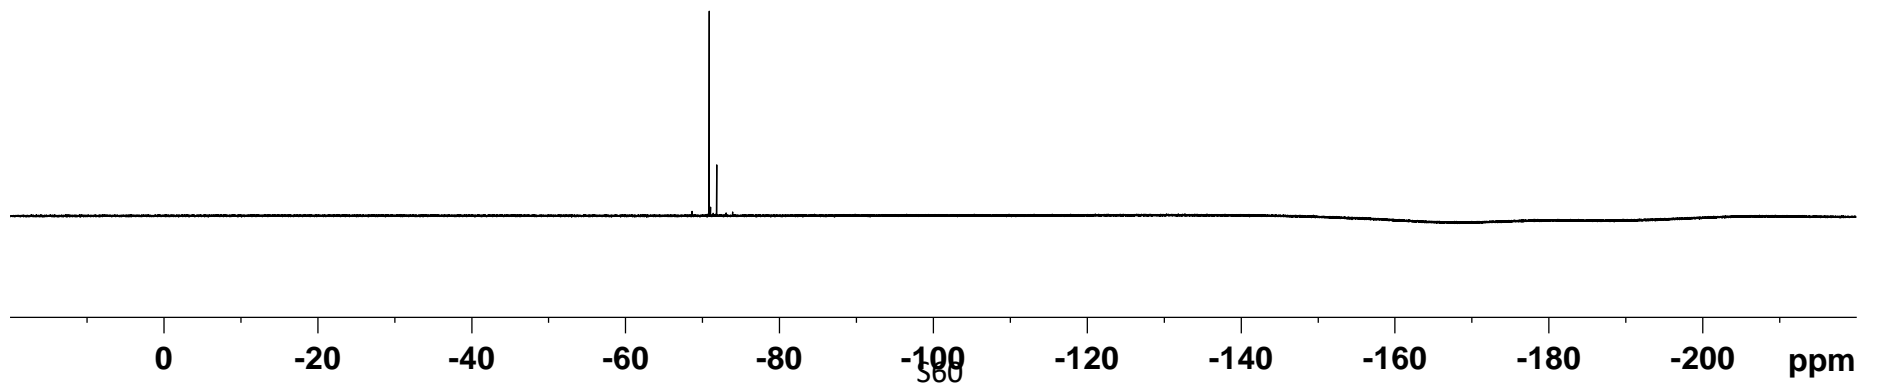

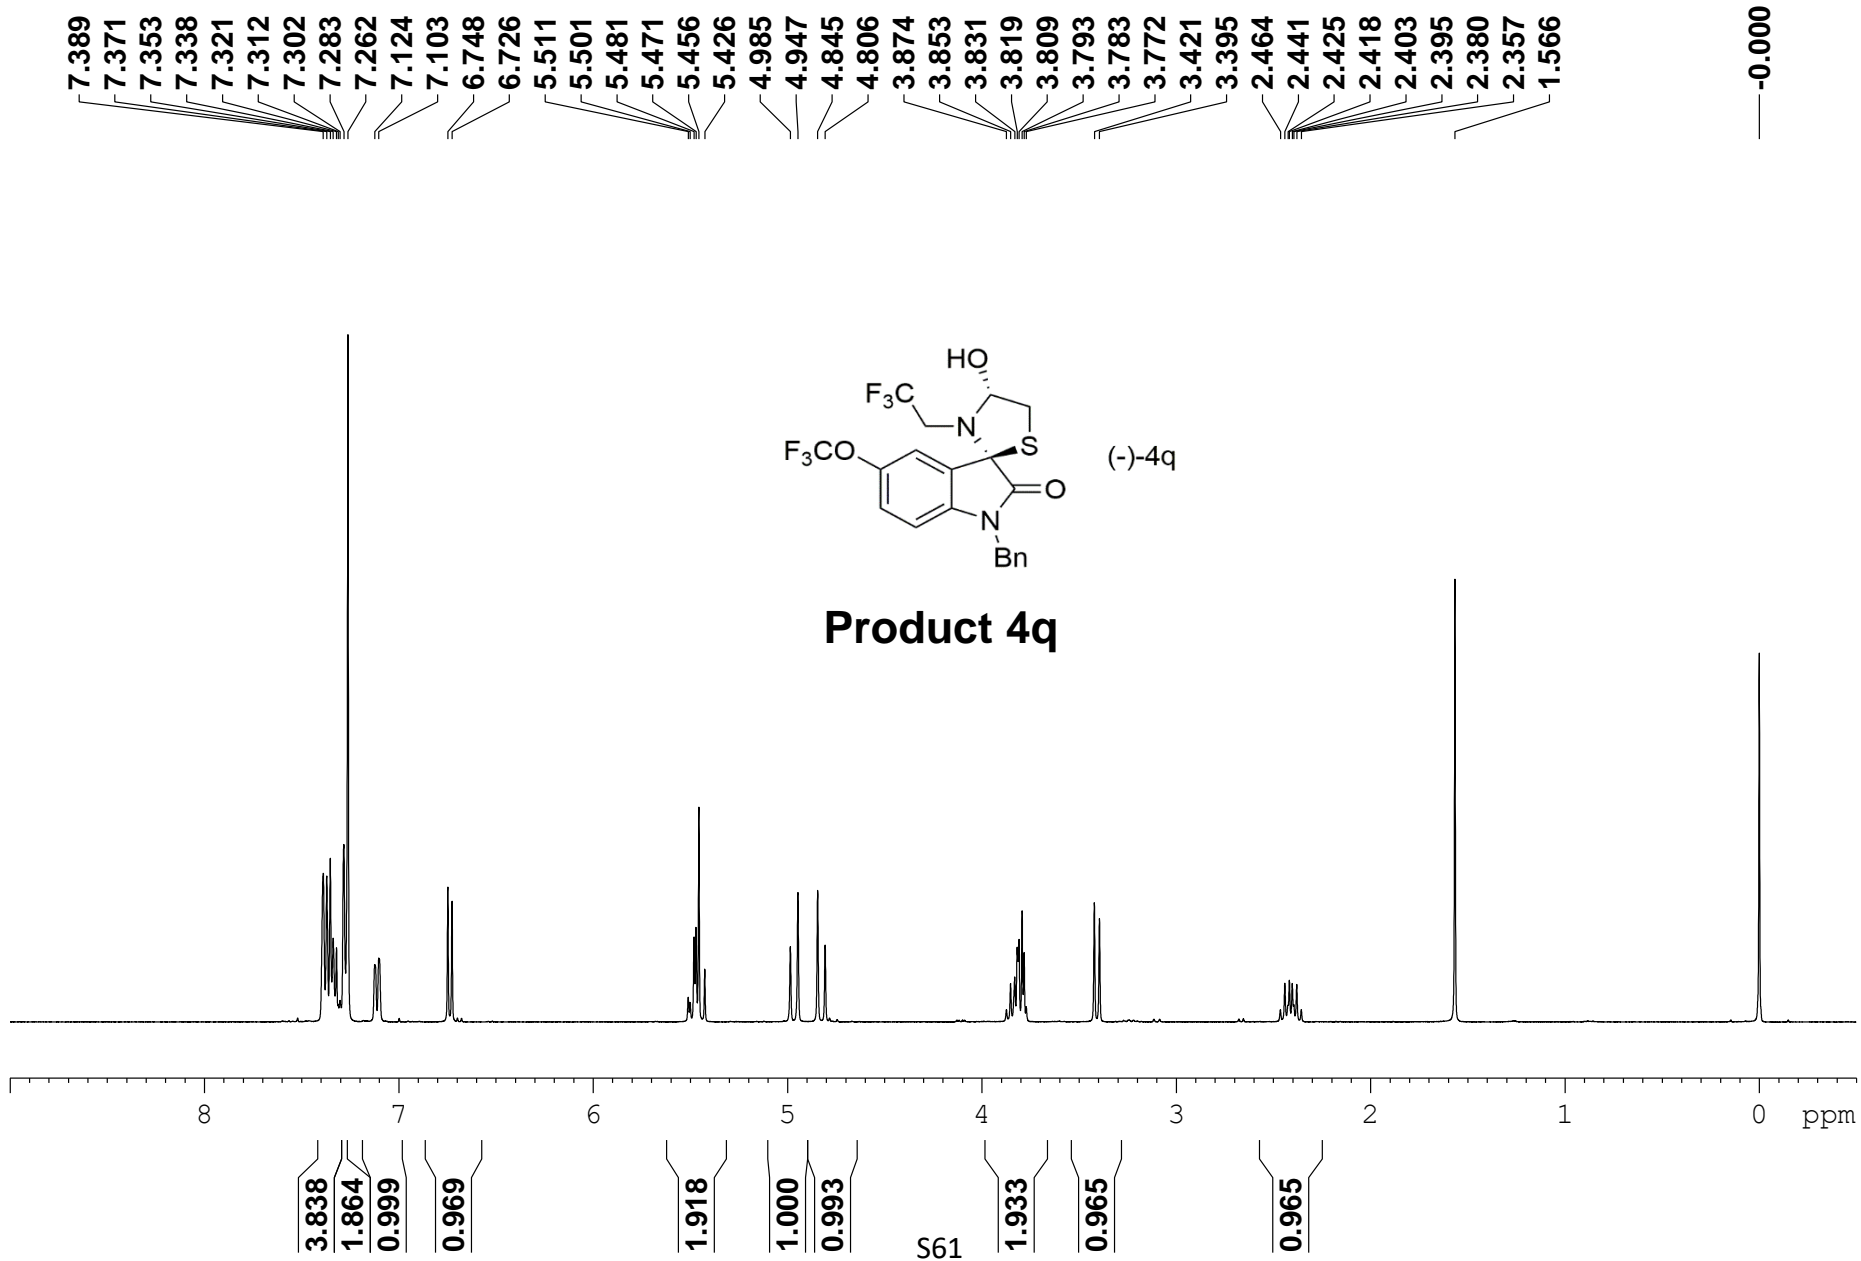

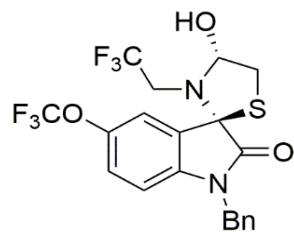

(-)-4q

**Product 4q**

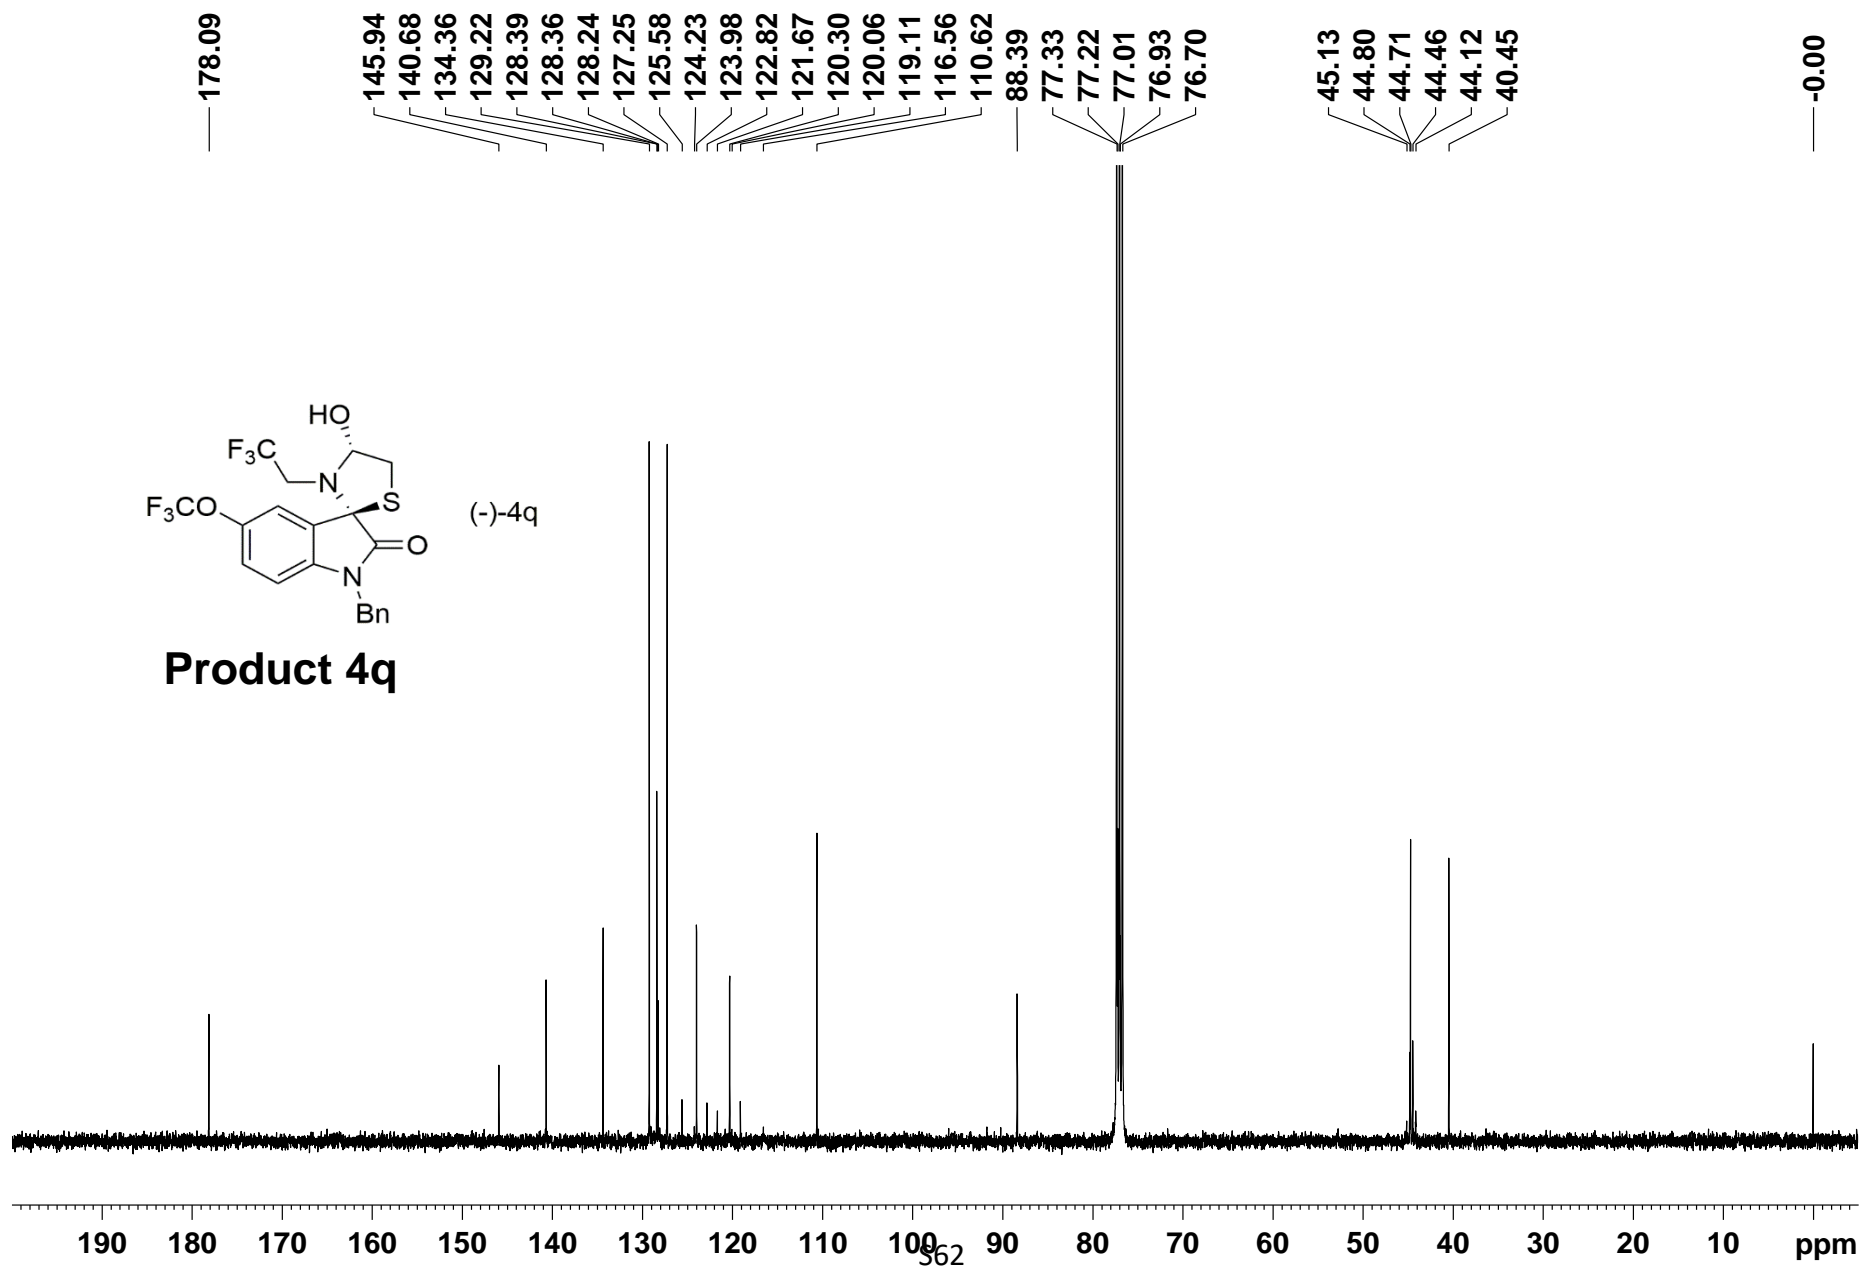

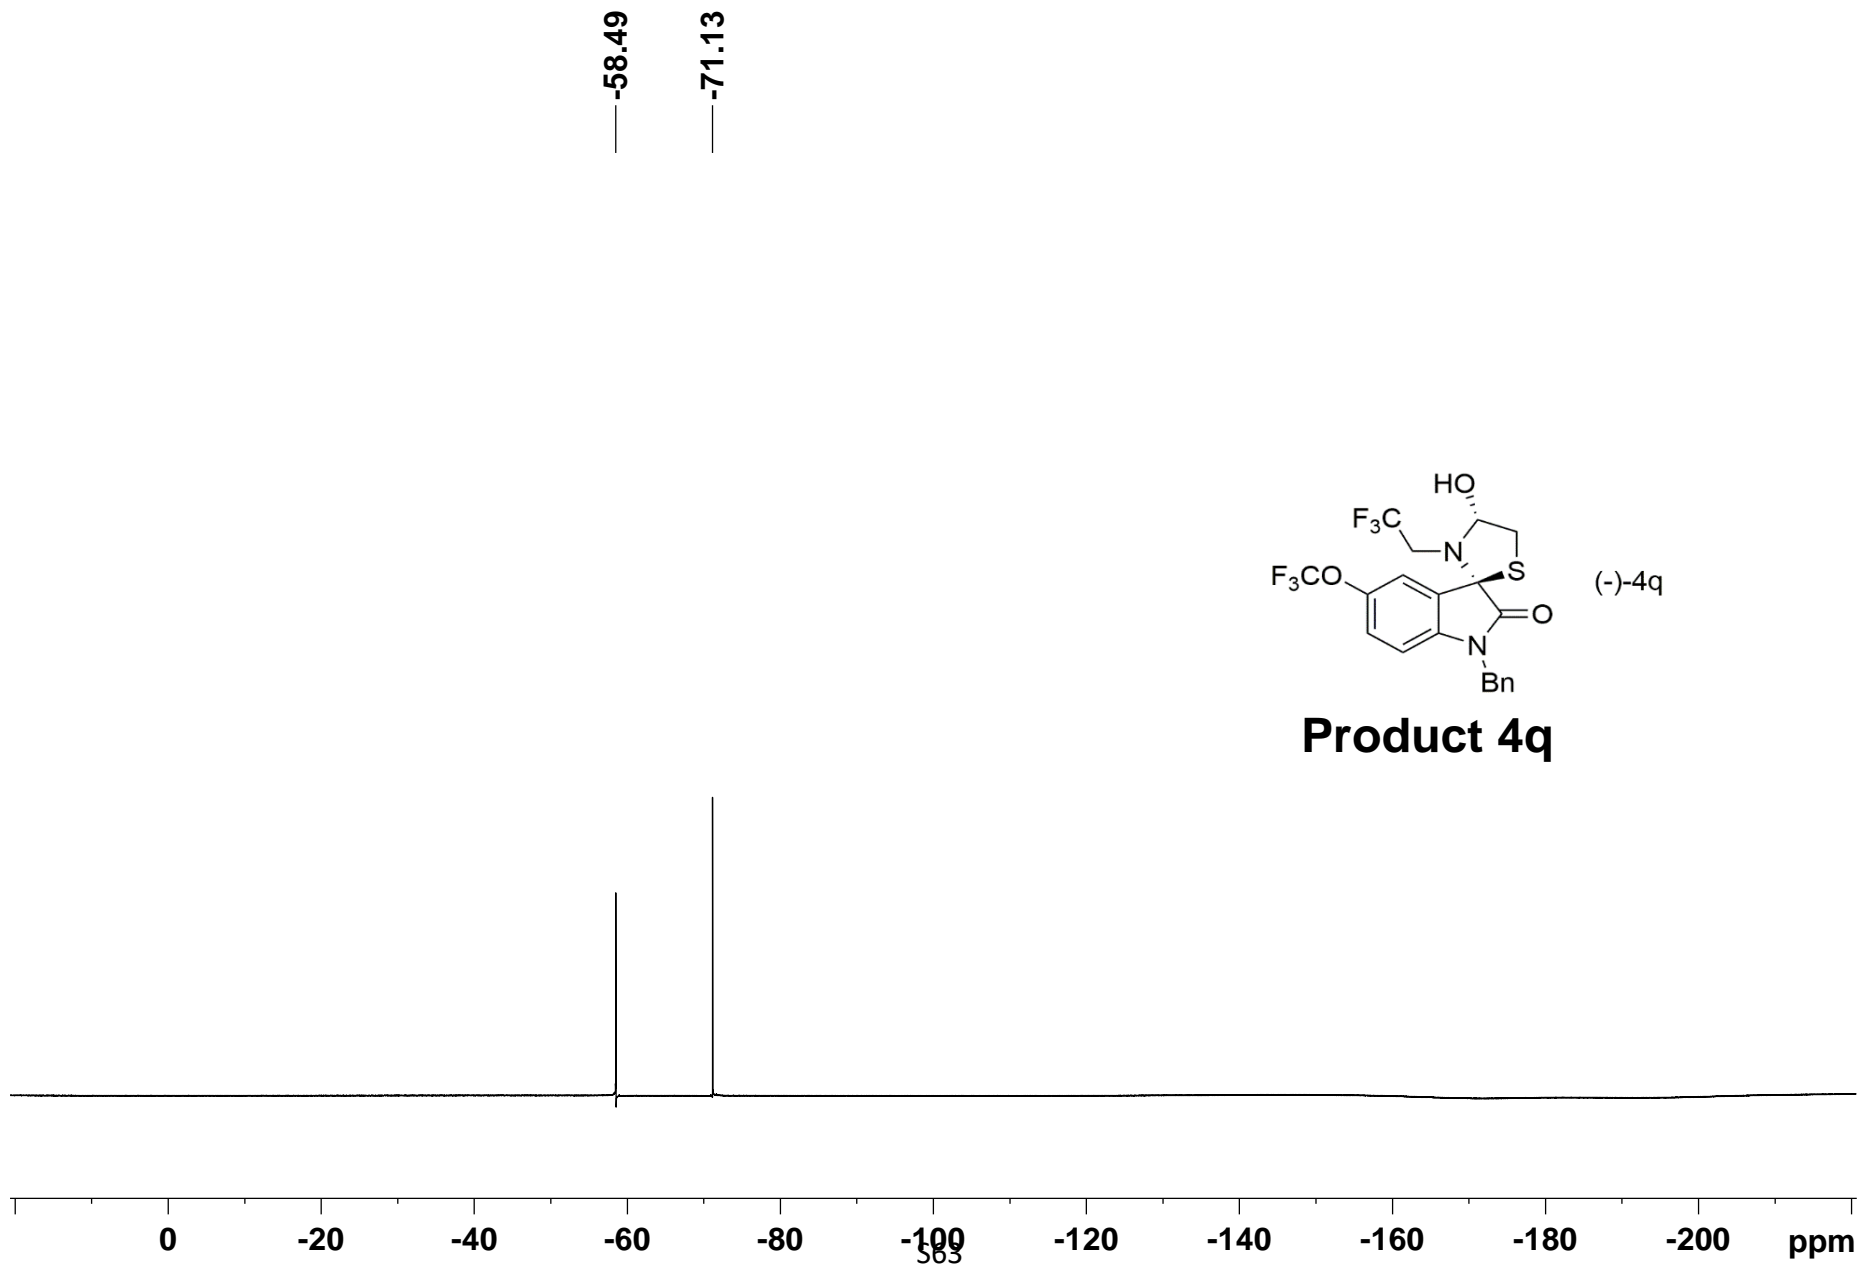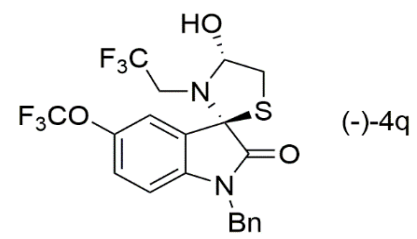

**Product 4q**

7.487  
7.470  
7.466  
7.460  
7.288  
7.285  
7.268  
7.265  
7.262  
7.249  
7.246  
7.198  
7.179  
7.174  
7.158  
7.134  
6.725  
6.706  
5.565  
5.535  
5.514  
5.503  
5.484  
5.473  
4.946  
4.907  
4.766  
4.727  
3.832  
3.808  
3.797  
3.789  
3.781  
3.771  
3.751  
3.730  
3.406  
3.379  
2.488  
2.465  
2.450  
2.441  
2.427  
2.417  
2.403  
2.380  
1.674  
1.256  
0.075  
-0.000

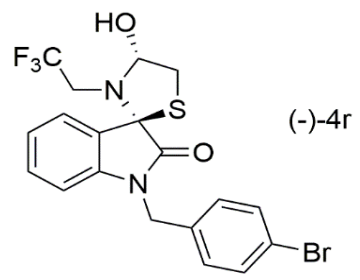

**Product 4r**

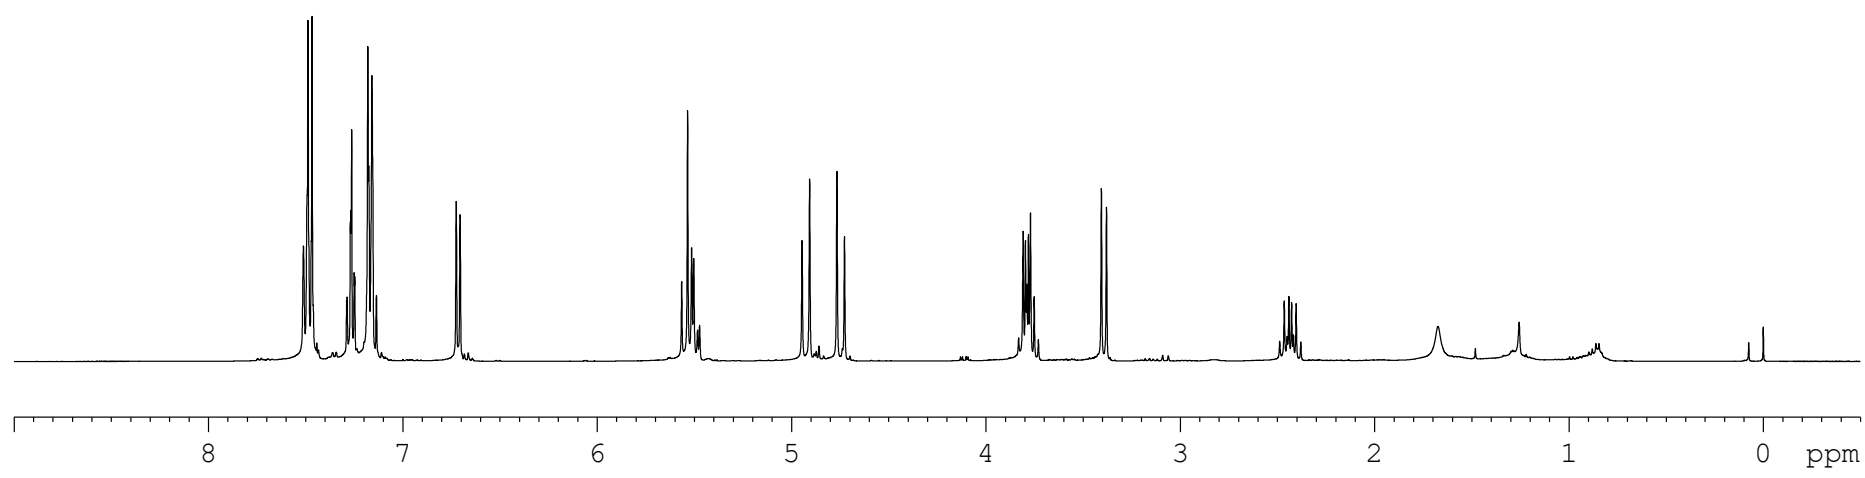

2.961  
1.403  
2.988  
0.944  
1.973  
1.041  
1.024  
S64  
1.992  
1.000  
1.031



178.21

141.97  
133.93  
132.26  
130.80  
129.00  
128.49  
126.63  
126.18  
125.73  
124.62  
122.96  
122.18  
120.19  
109.71

88.13  
77.38  
77.26  
77.12  
77.06  
76.74

45.00  
44.67  
44.33  
44.00  
43.88  
40.31

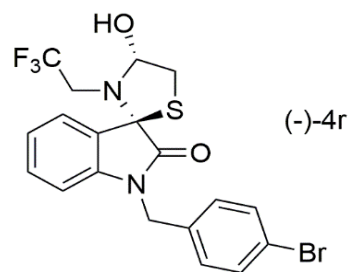

Product 4r

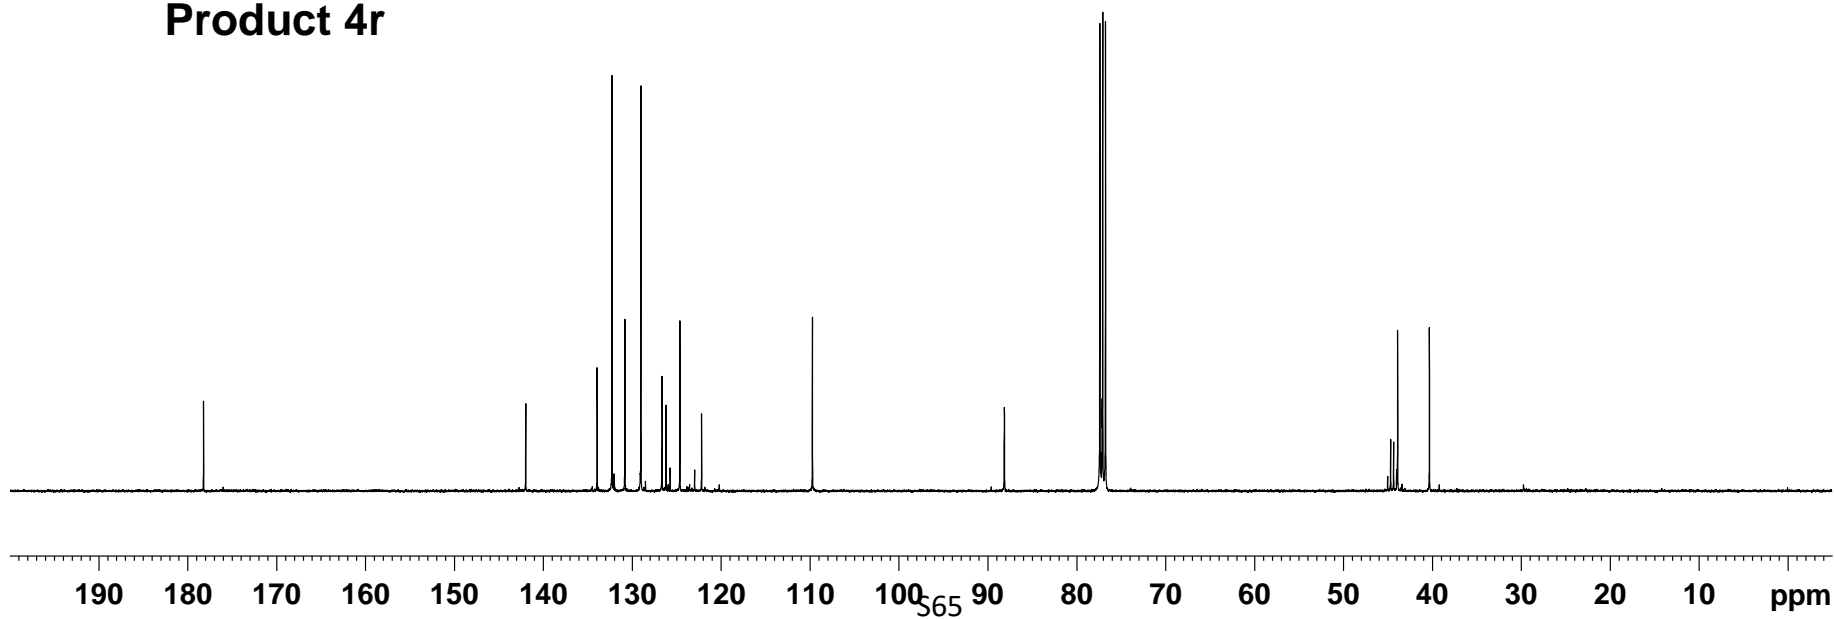

— -70.78

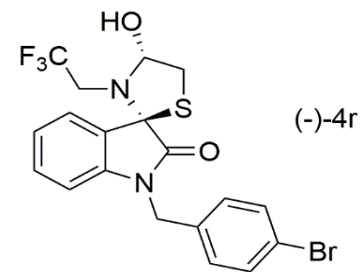

**Product 4r**

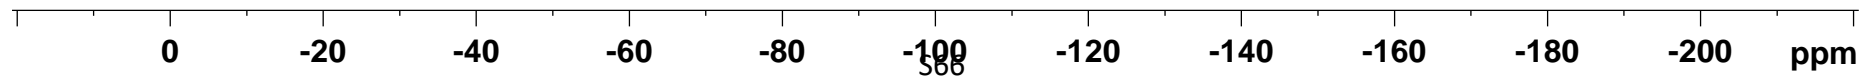

7.491  
7.473  
7.267  
7.264  
7.258  
7.248  
7.229  
7.190  
7.169  
7.152  
7.127  
7.108  
6.768  
6.748  
5.656  
5.626  
5.513  
5.502  
5.483  
5.472  
4.908  
4.869  
4.824  
4.786  
3.831  
3.810  
3.799  
3.788  
3.773  
3.761  
3.751  
3.729  
3.406  
3.380  
2.486  
2.475  
2.462  
2.448  
2.439  
2.425  
2.415  
2.401  
2.377  
2.319  
1.609

-0.000

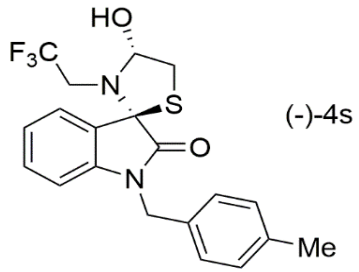

**Product 4s**

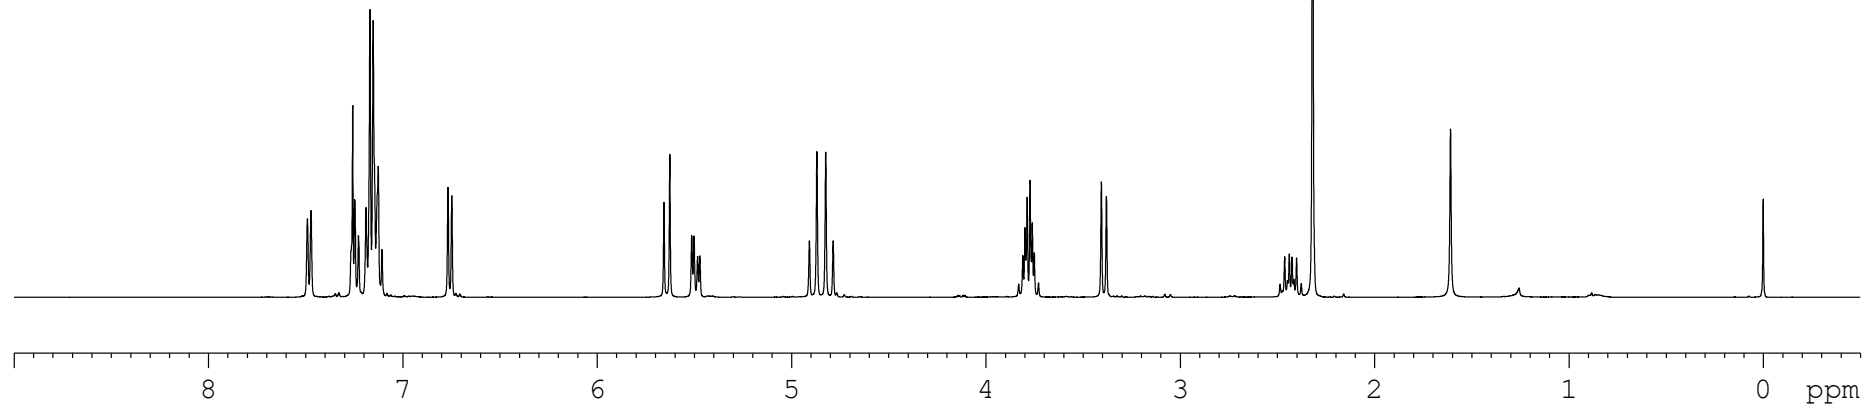

0.962  
0.856  
4.947  
1.002  
0.958  
0.971  
2.012  
1.963  
0.983  
1.036  
3.000

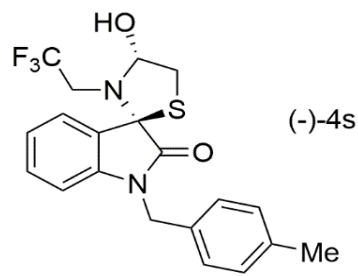

**Product 4s**

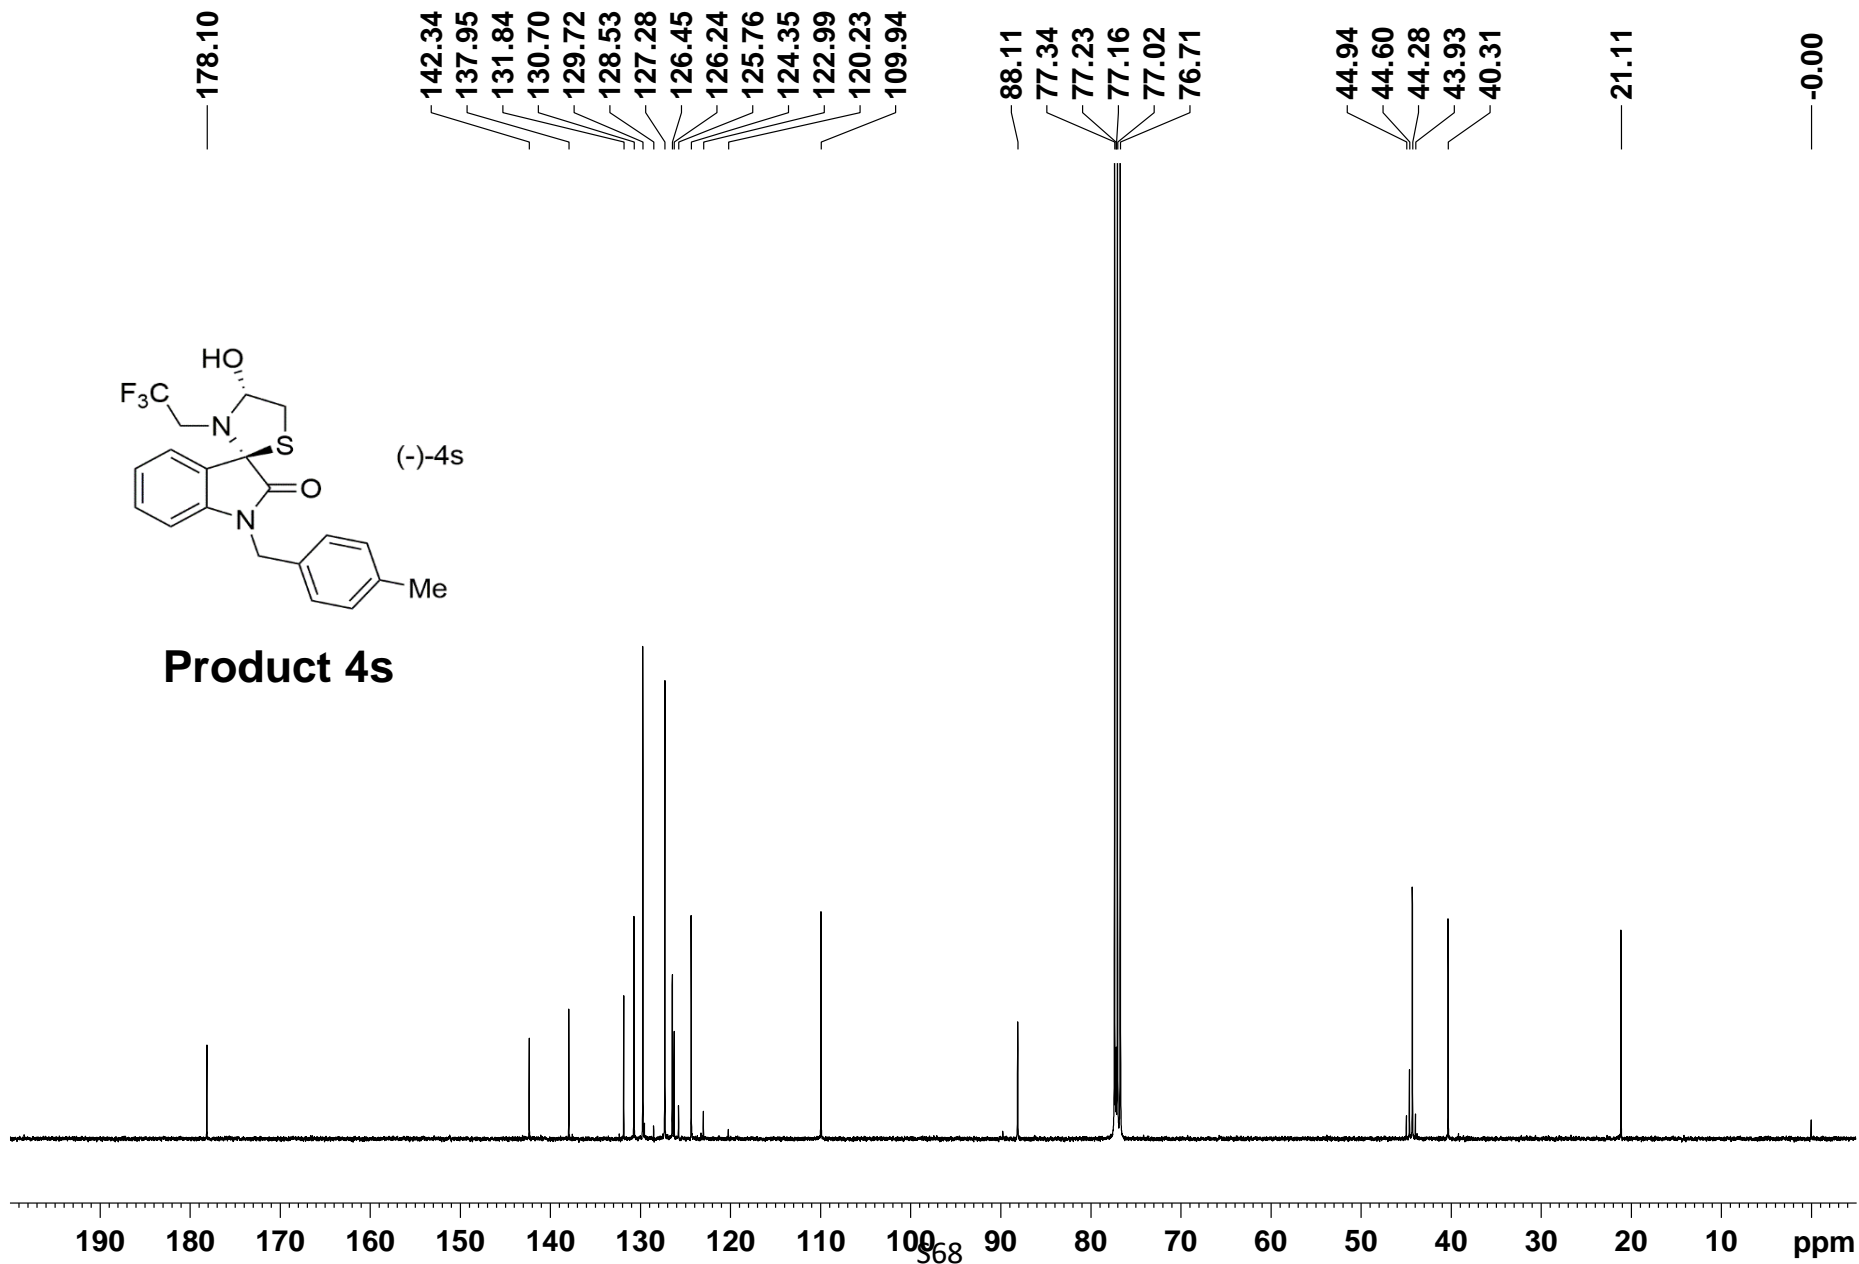

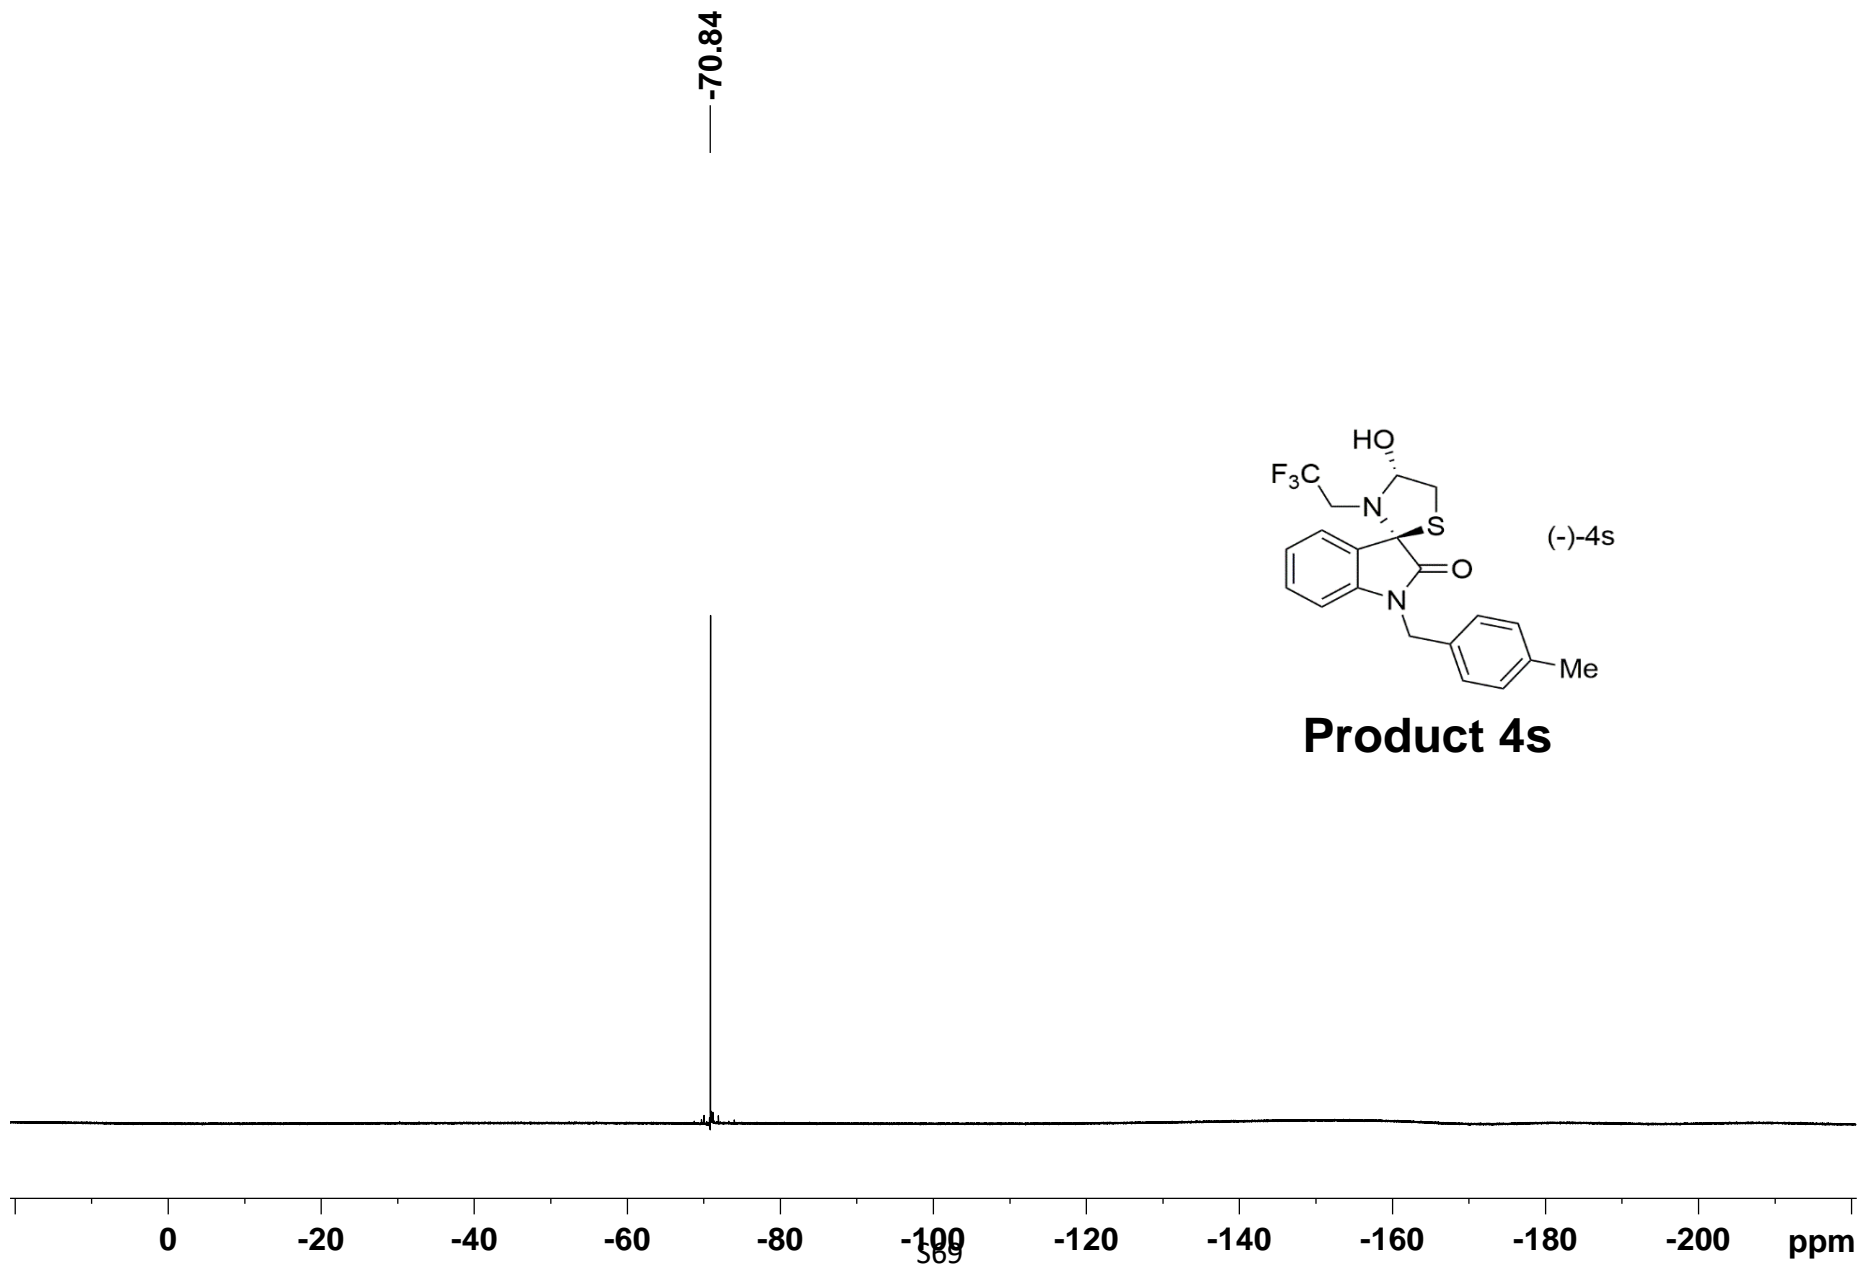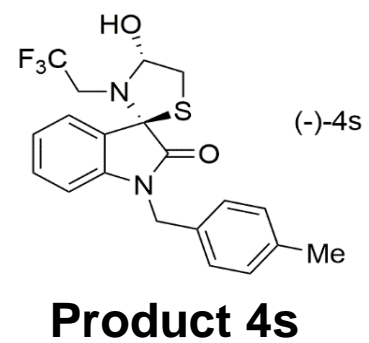

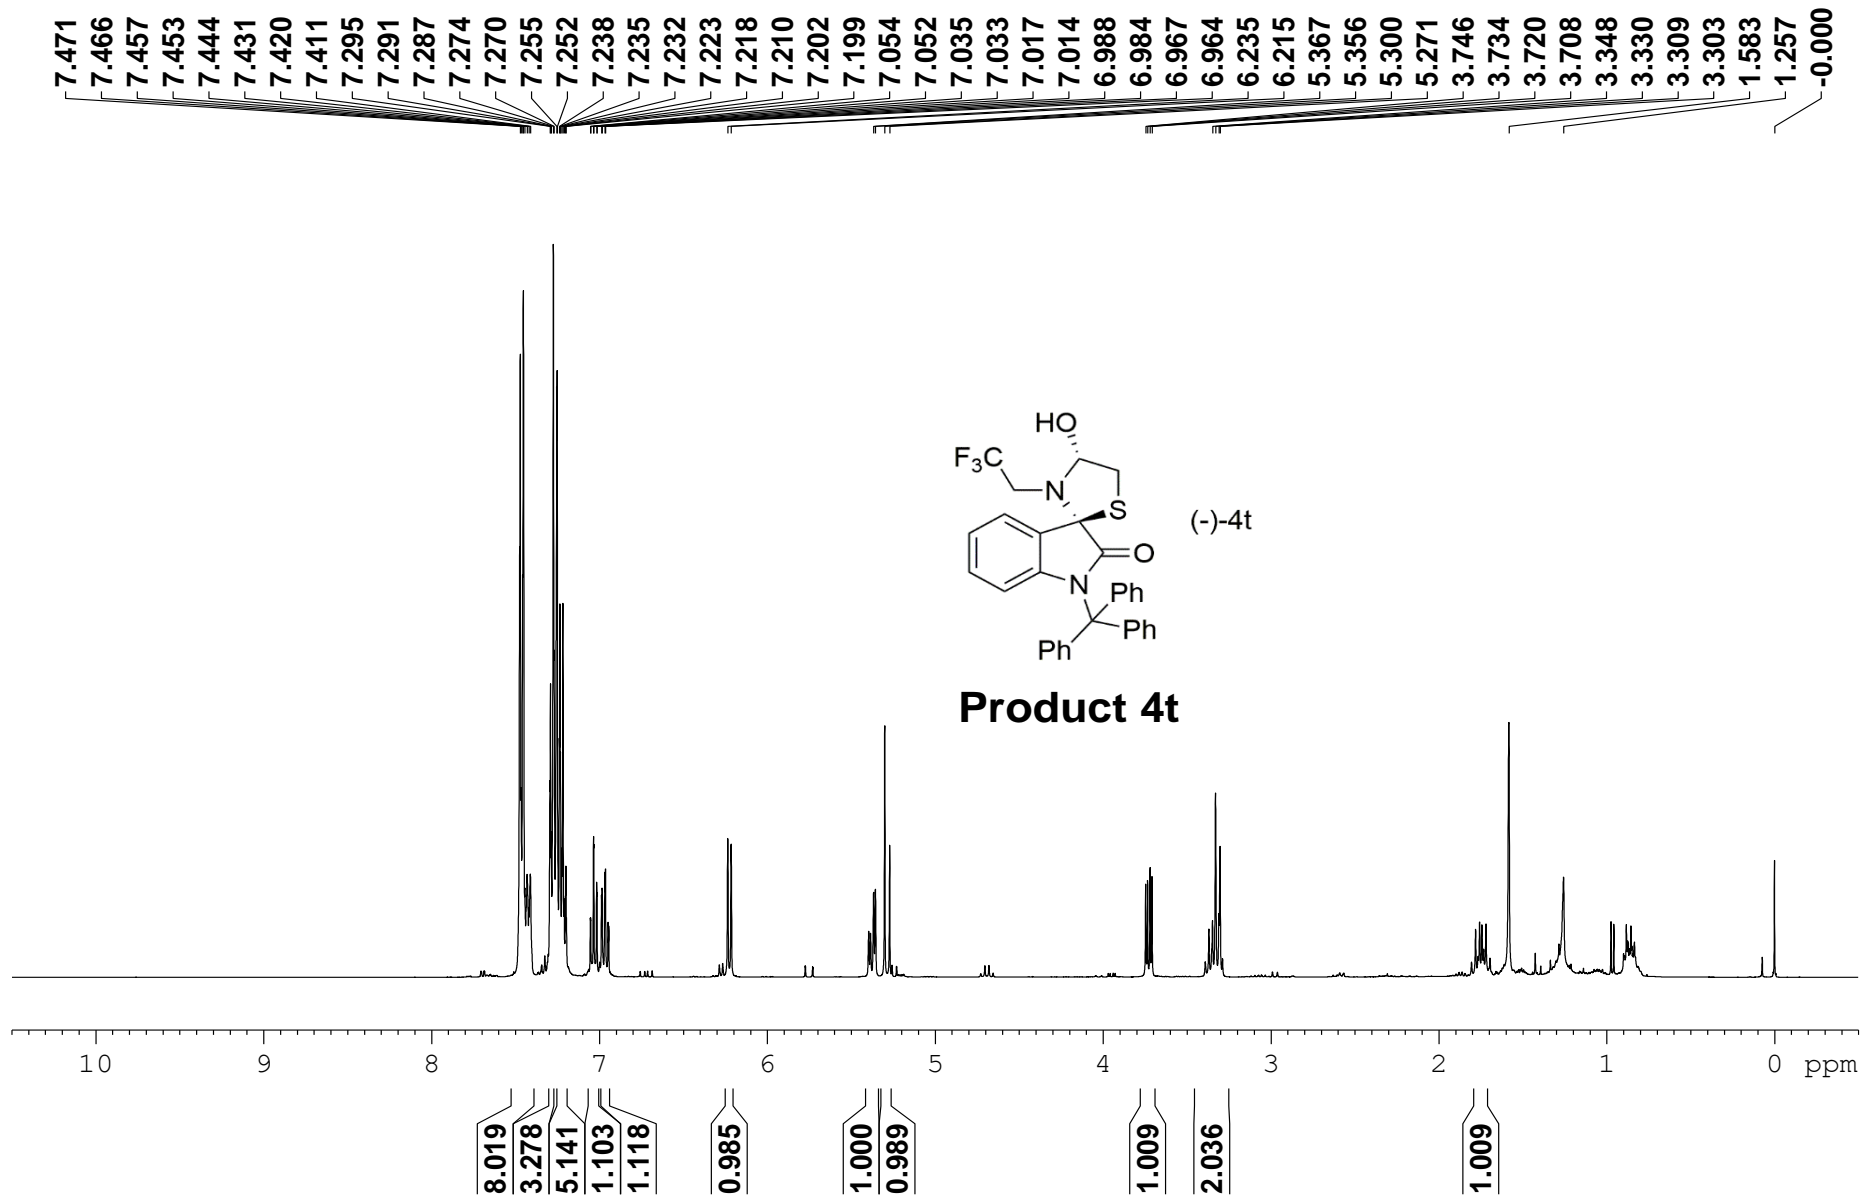

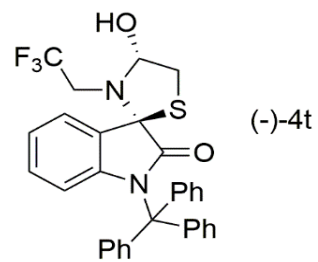

**Product 4t**

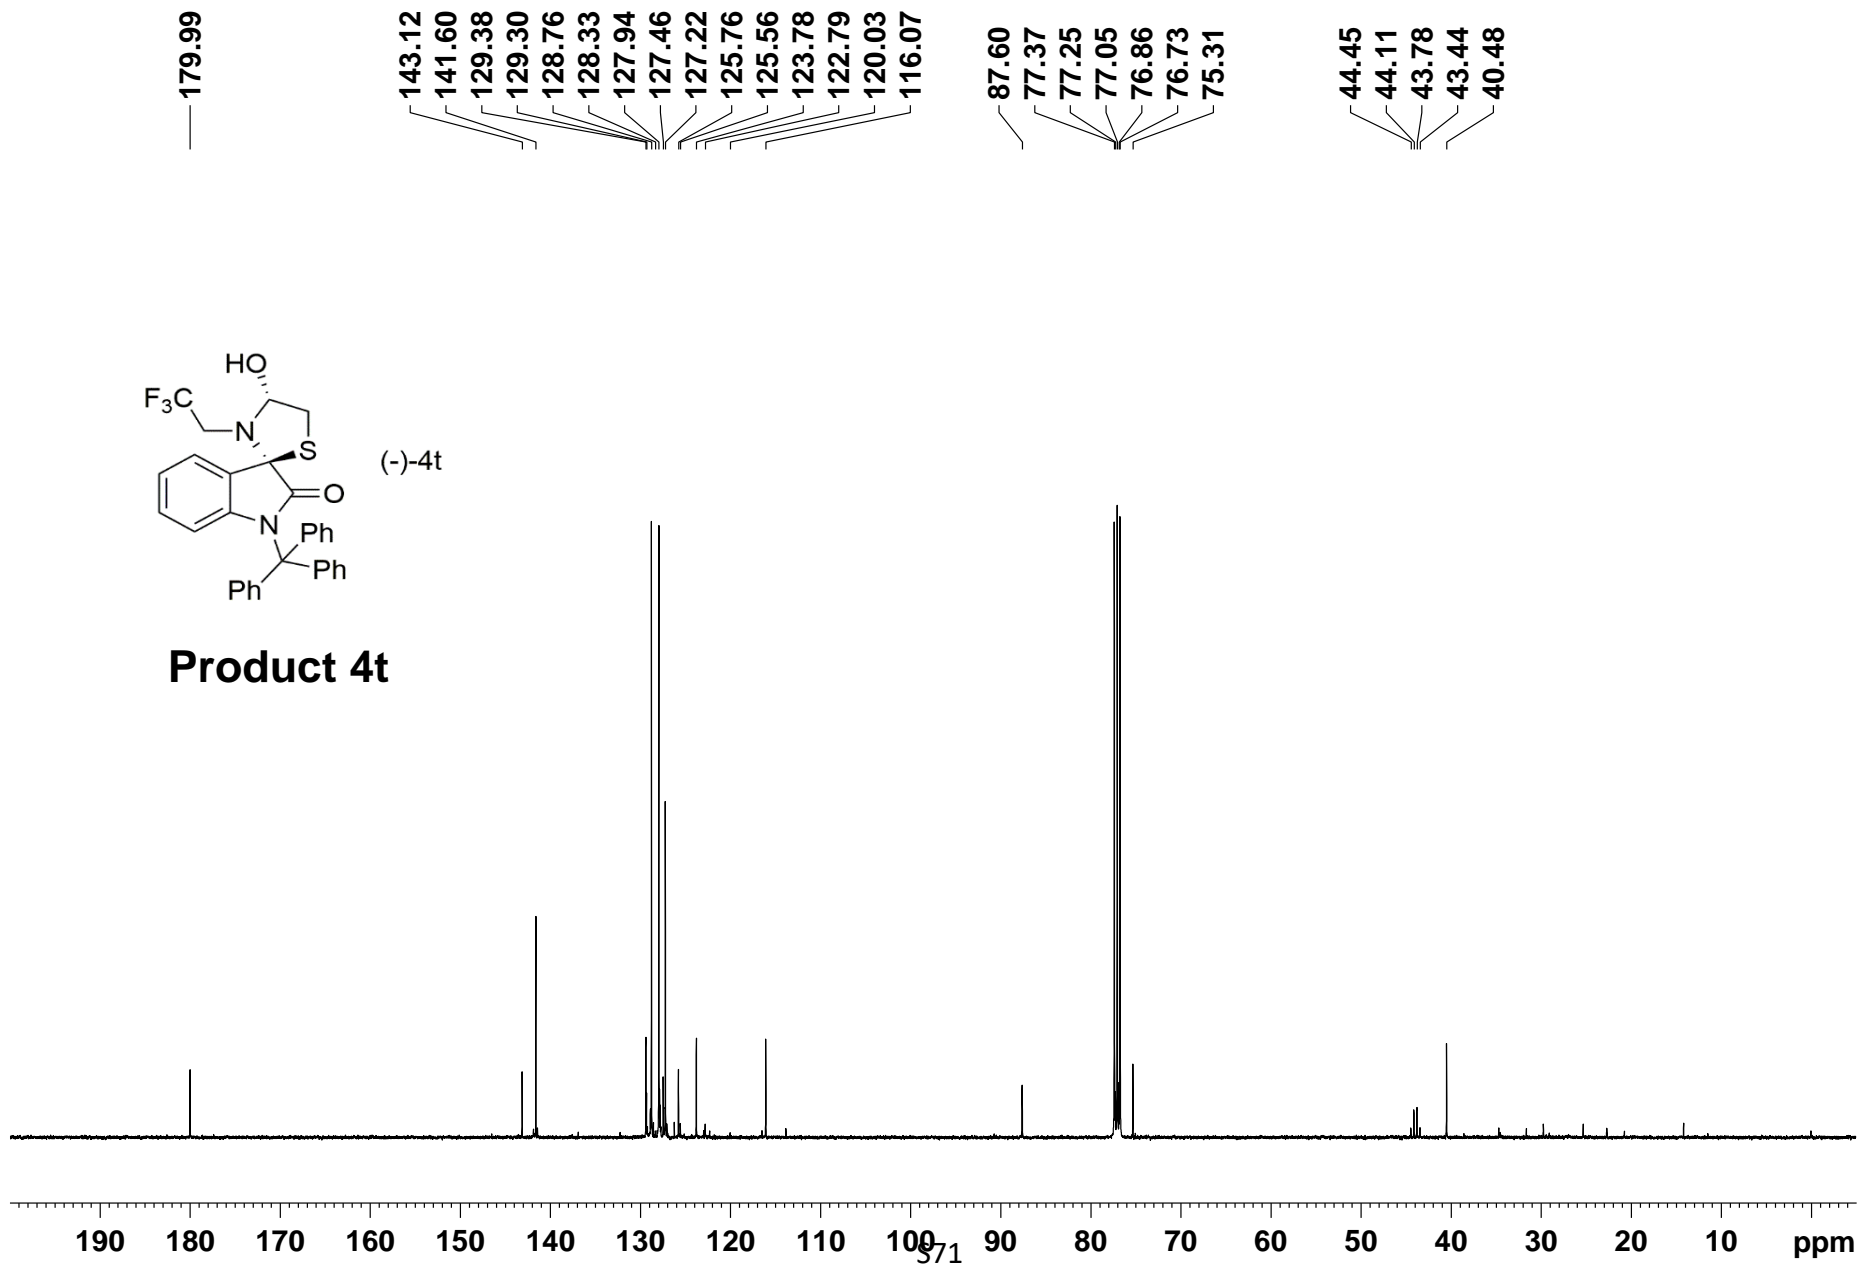

— -70.92

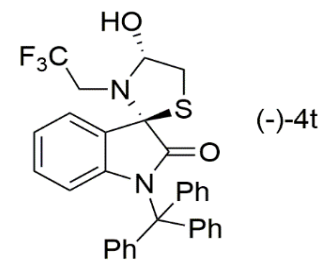

**Product 4t**

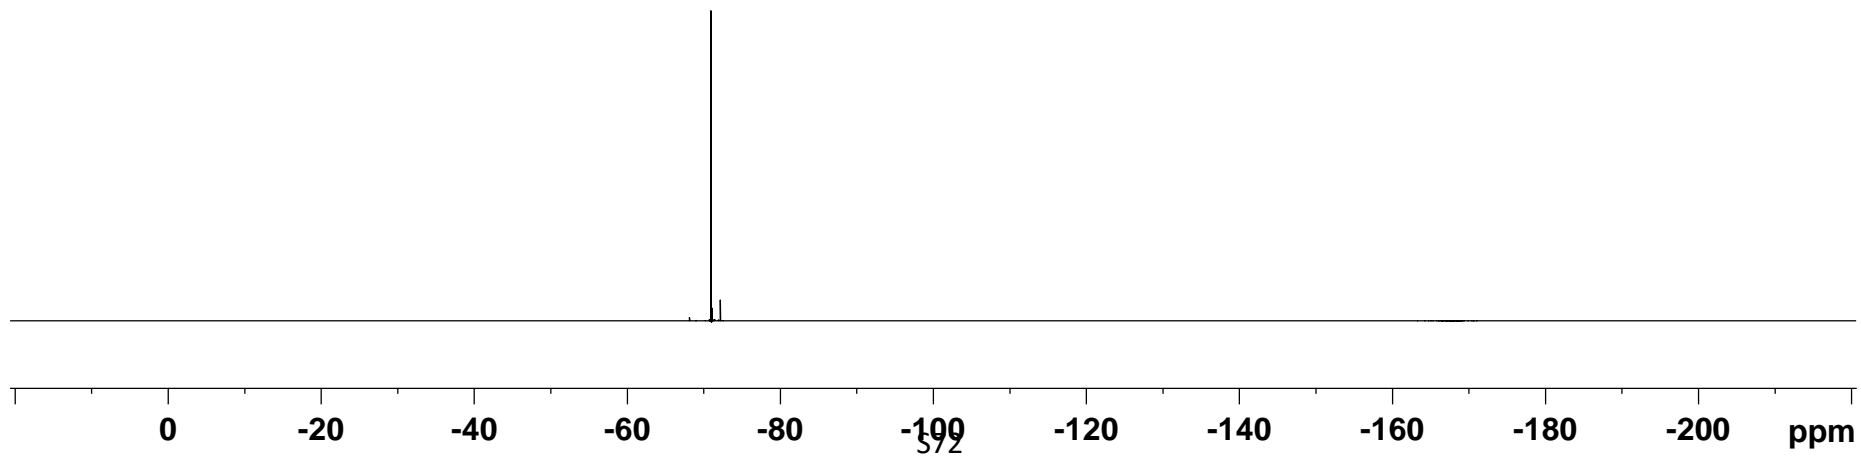



7.489  
7.354  
7.351  
7.334  
7.331  
7.315  
7.312  
7.260  
7.188  
7.186  
7.170  
7.168  
7.151  
7.149  
6.847  
6.827  
5.866  
5.853  
5.840  
5.823  
5.811  
5.798  
5.576  
5.546  
5.490  
5.479  
5.289  
5.287  
5.262  
5.219  
5.217  
4.350  
4.337  
4.320  
4.306  
3.785  
3.774  
3.764  
3.759  
3.747  
3.726  
3.381  
3.355  
2.459  
2.436  
2.422  
2.398  
1.619  
1.250  
-0.005

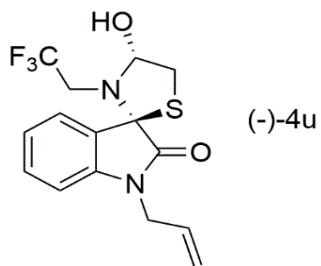

**Product 4u**

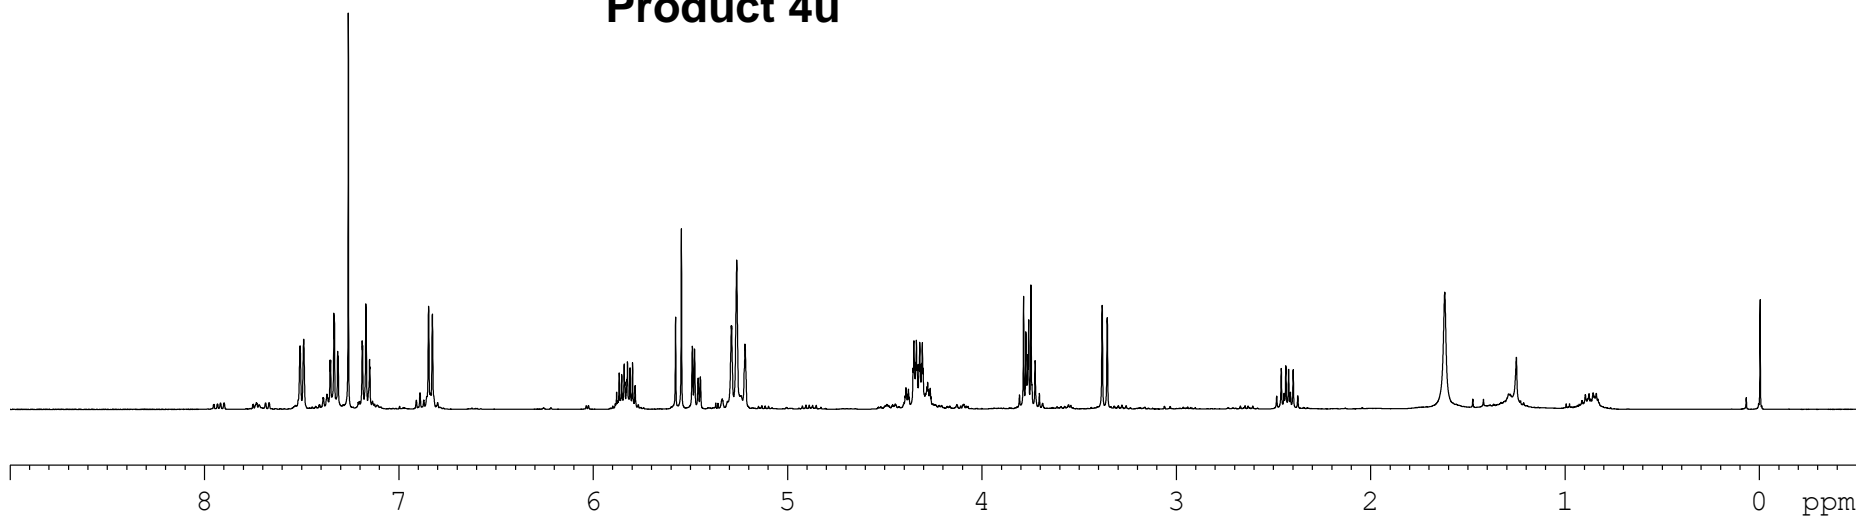

0.941  
1.116  
1.150  
1.087  
1.276  
0.924  
0.930  
2.455  
4.802  
1.956  
0.957  
1.000

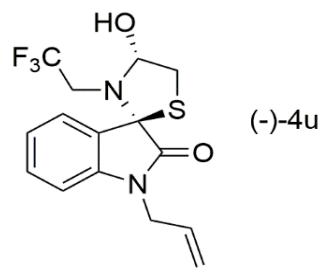

Product 4u

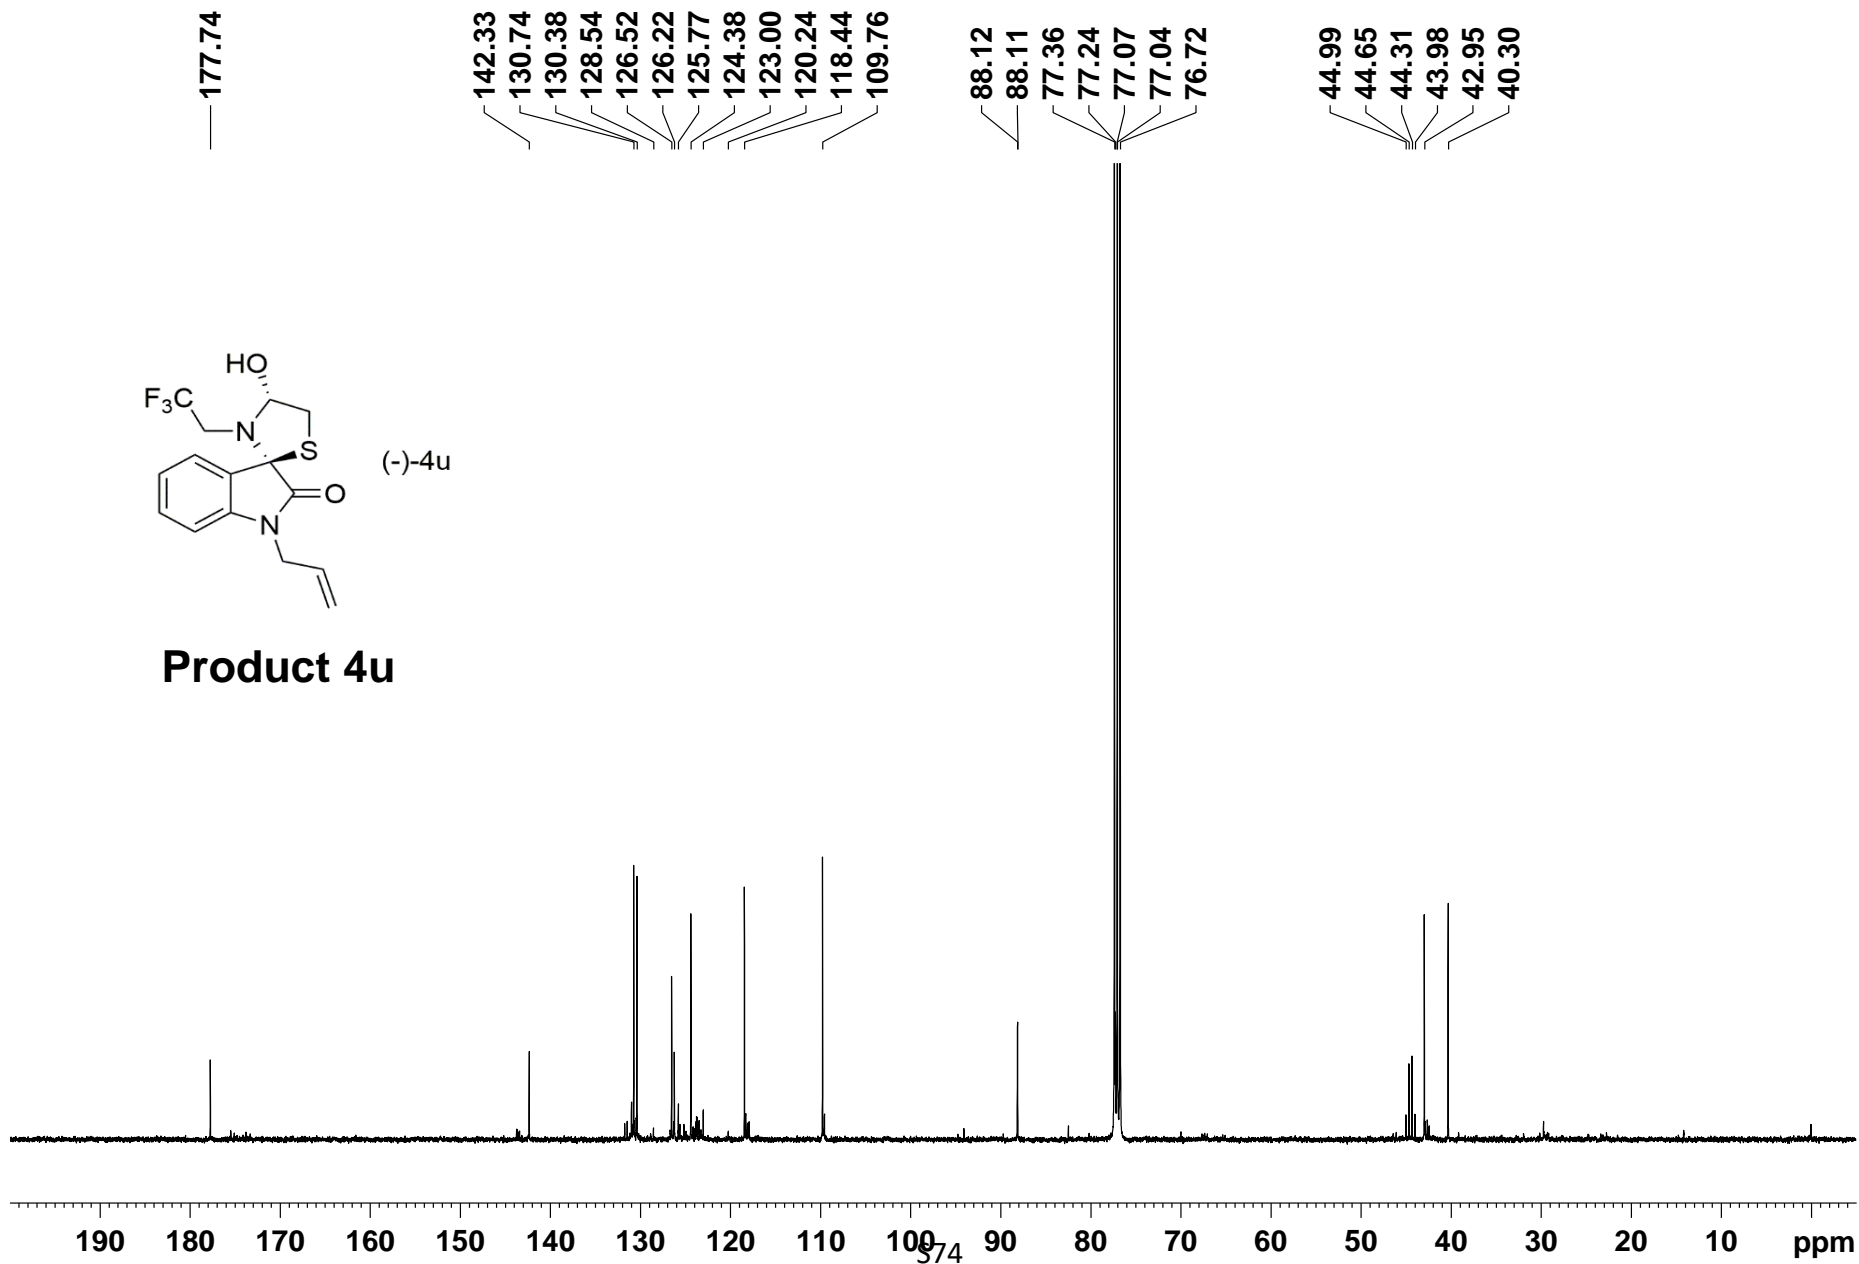

— -70.84

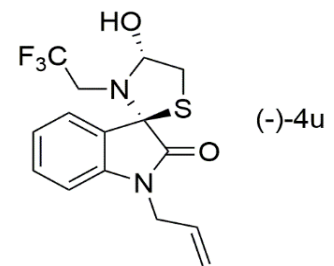

**Product 4u**

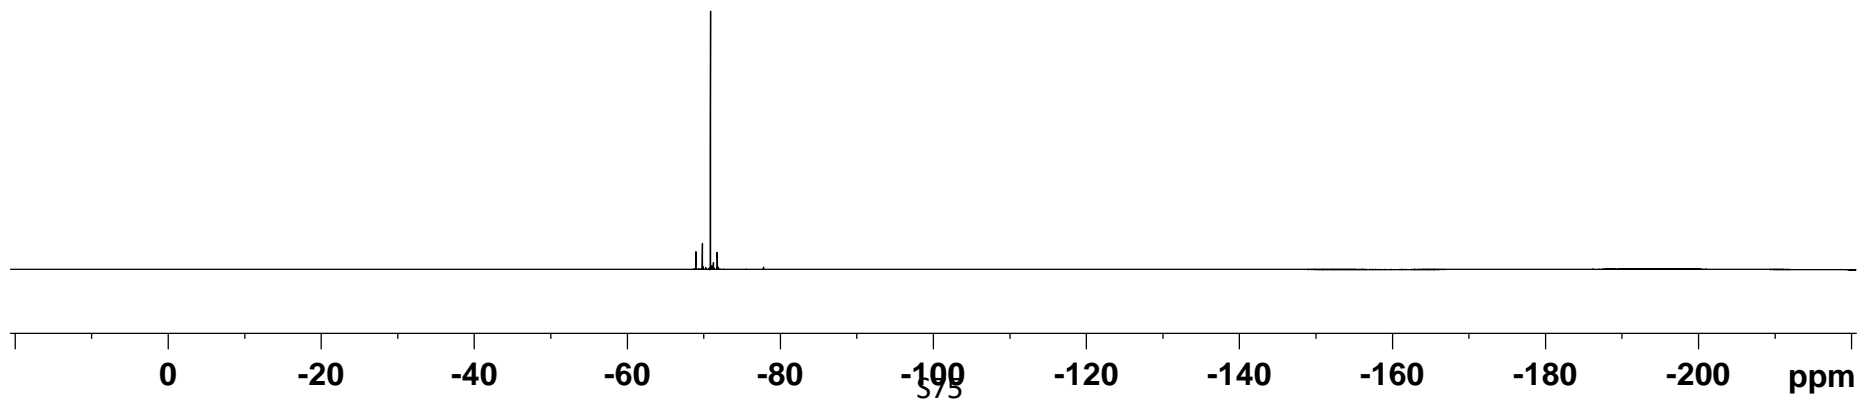

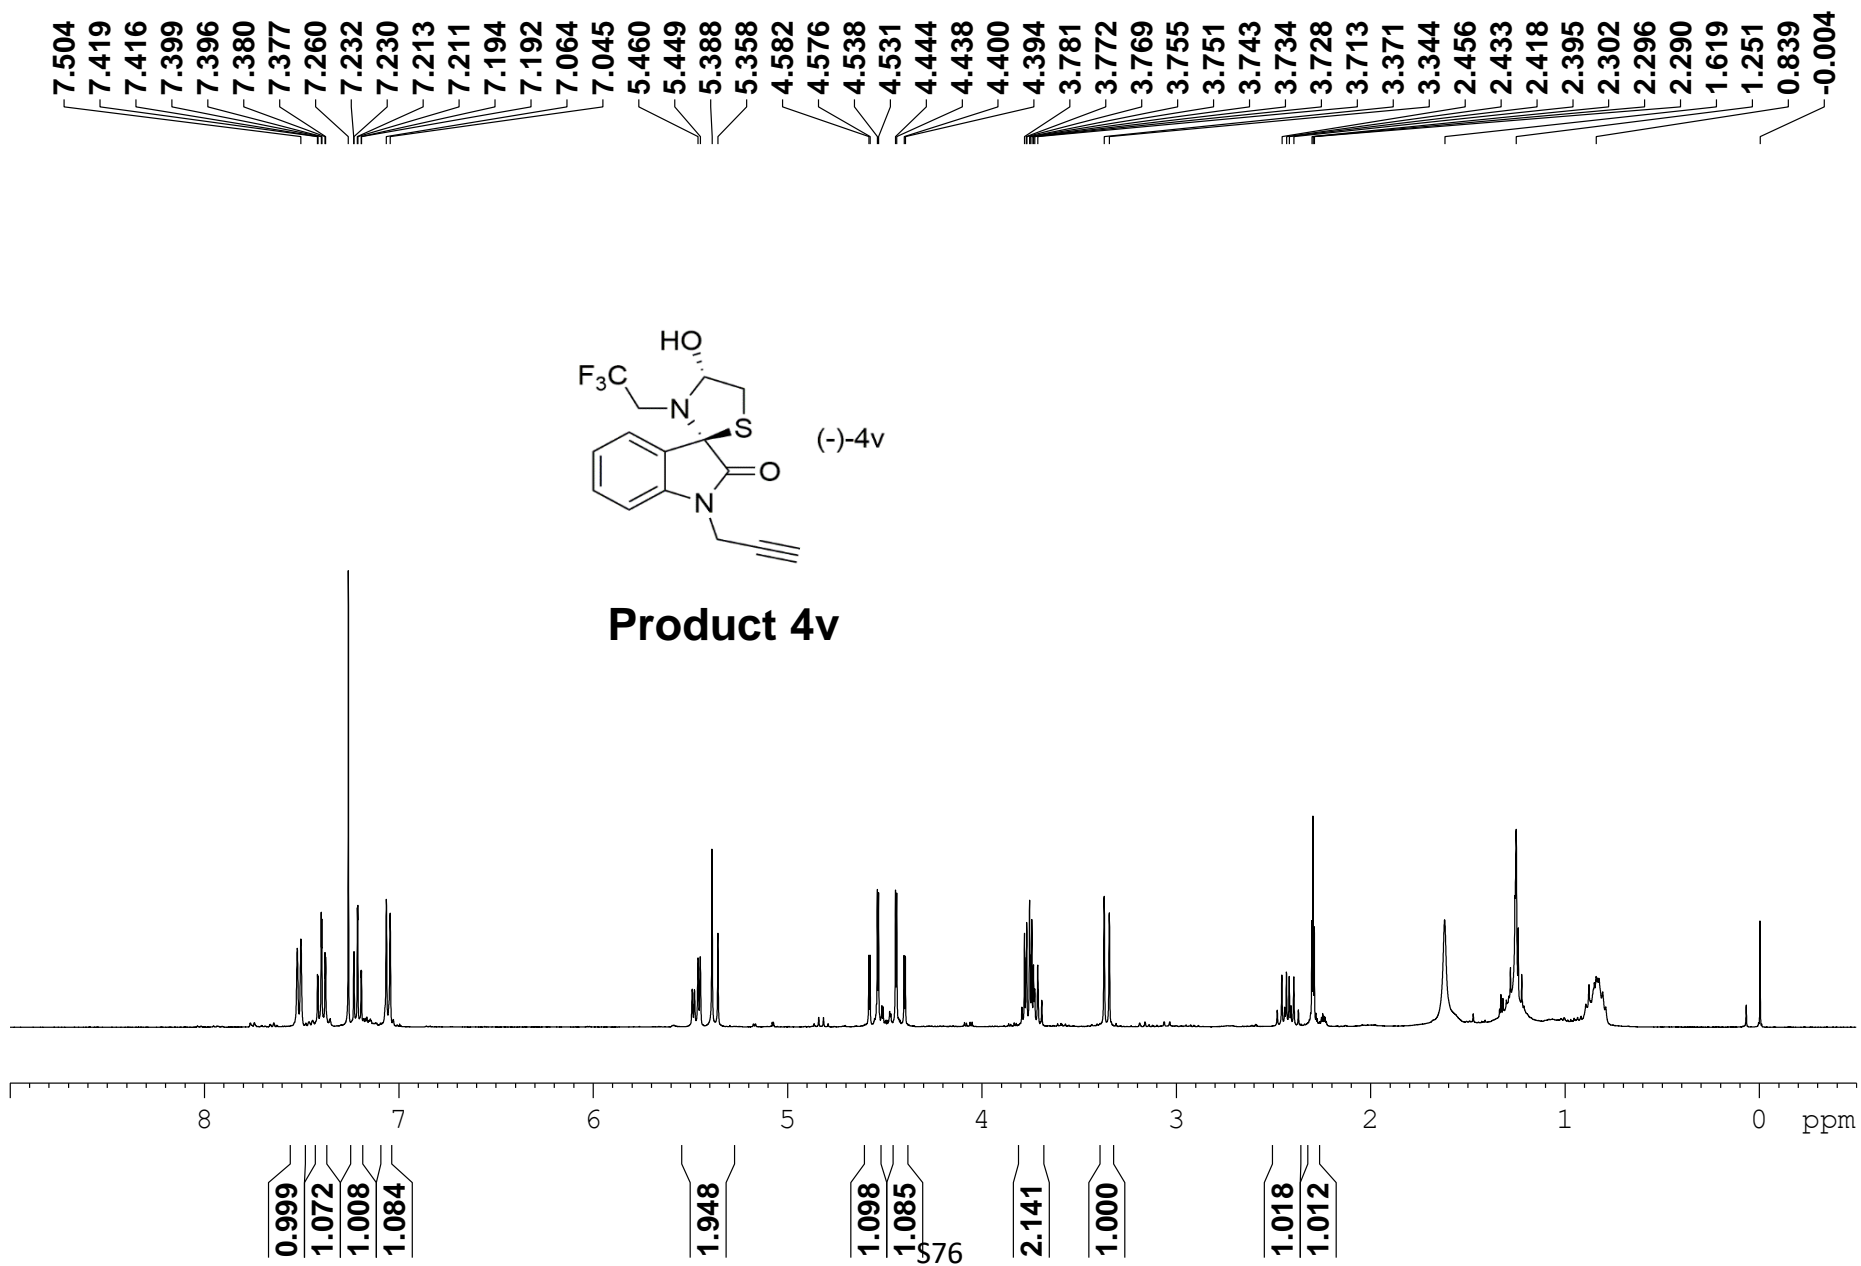

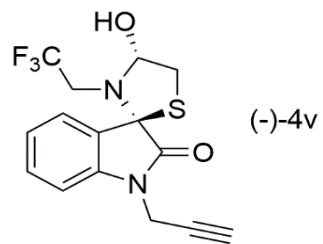

**Product 4v**

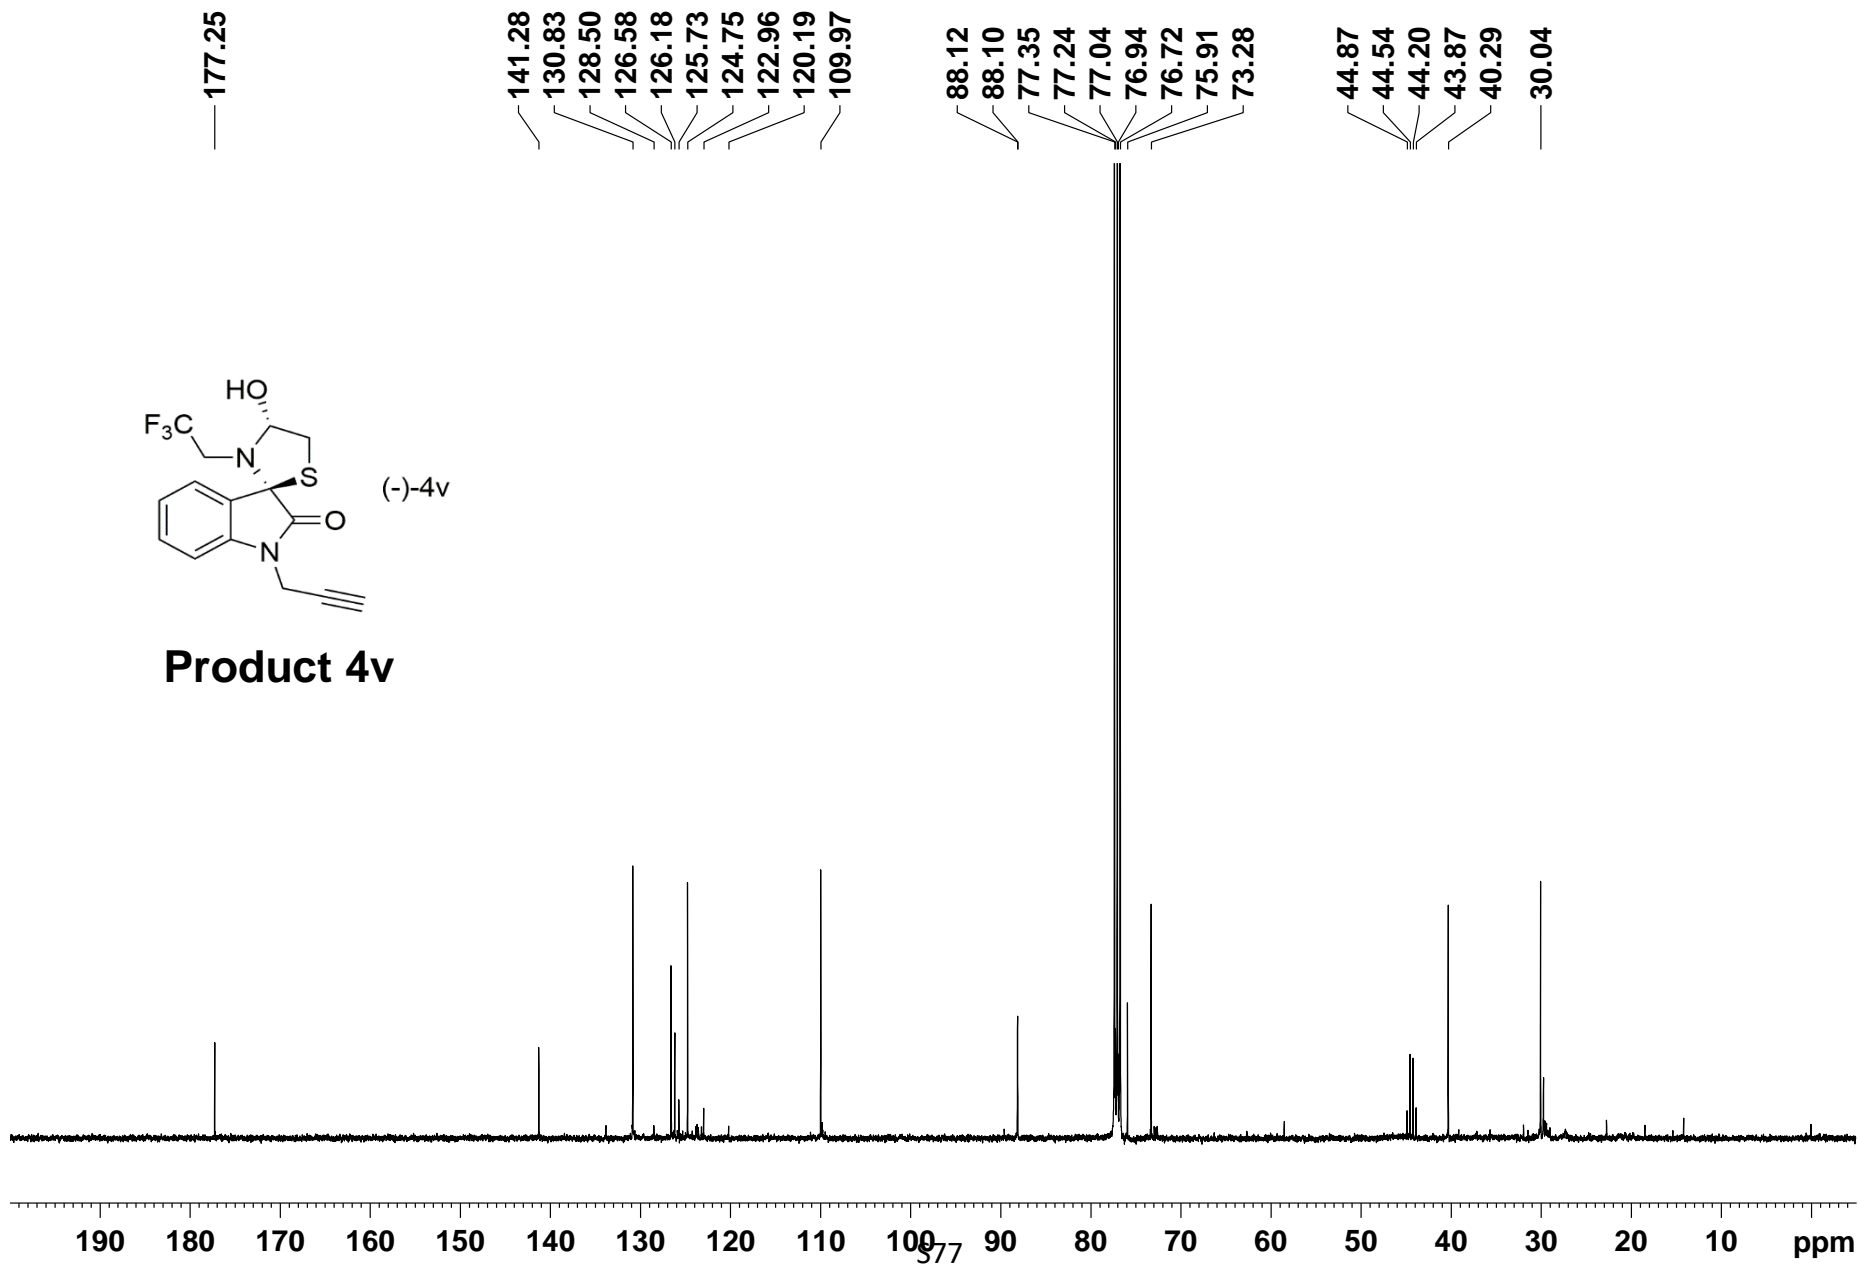

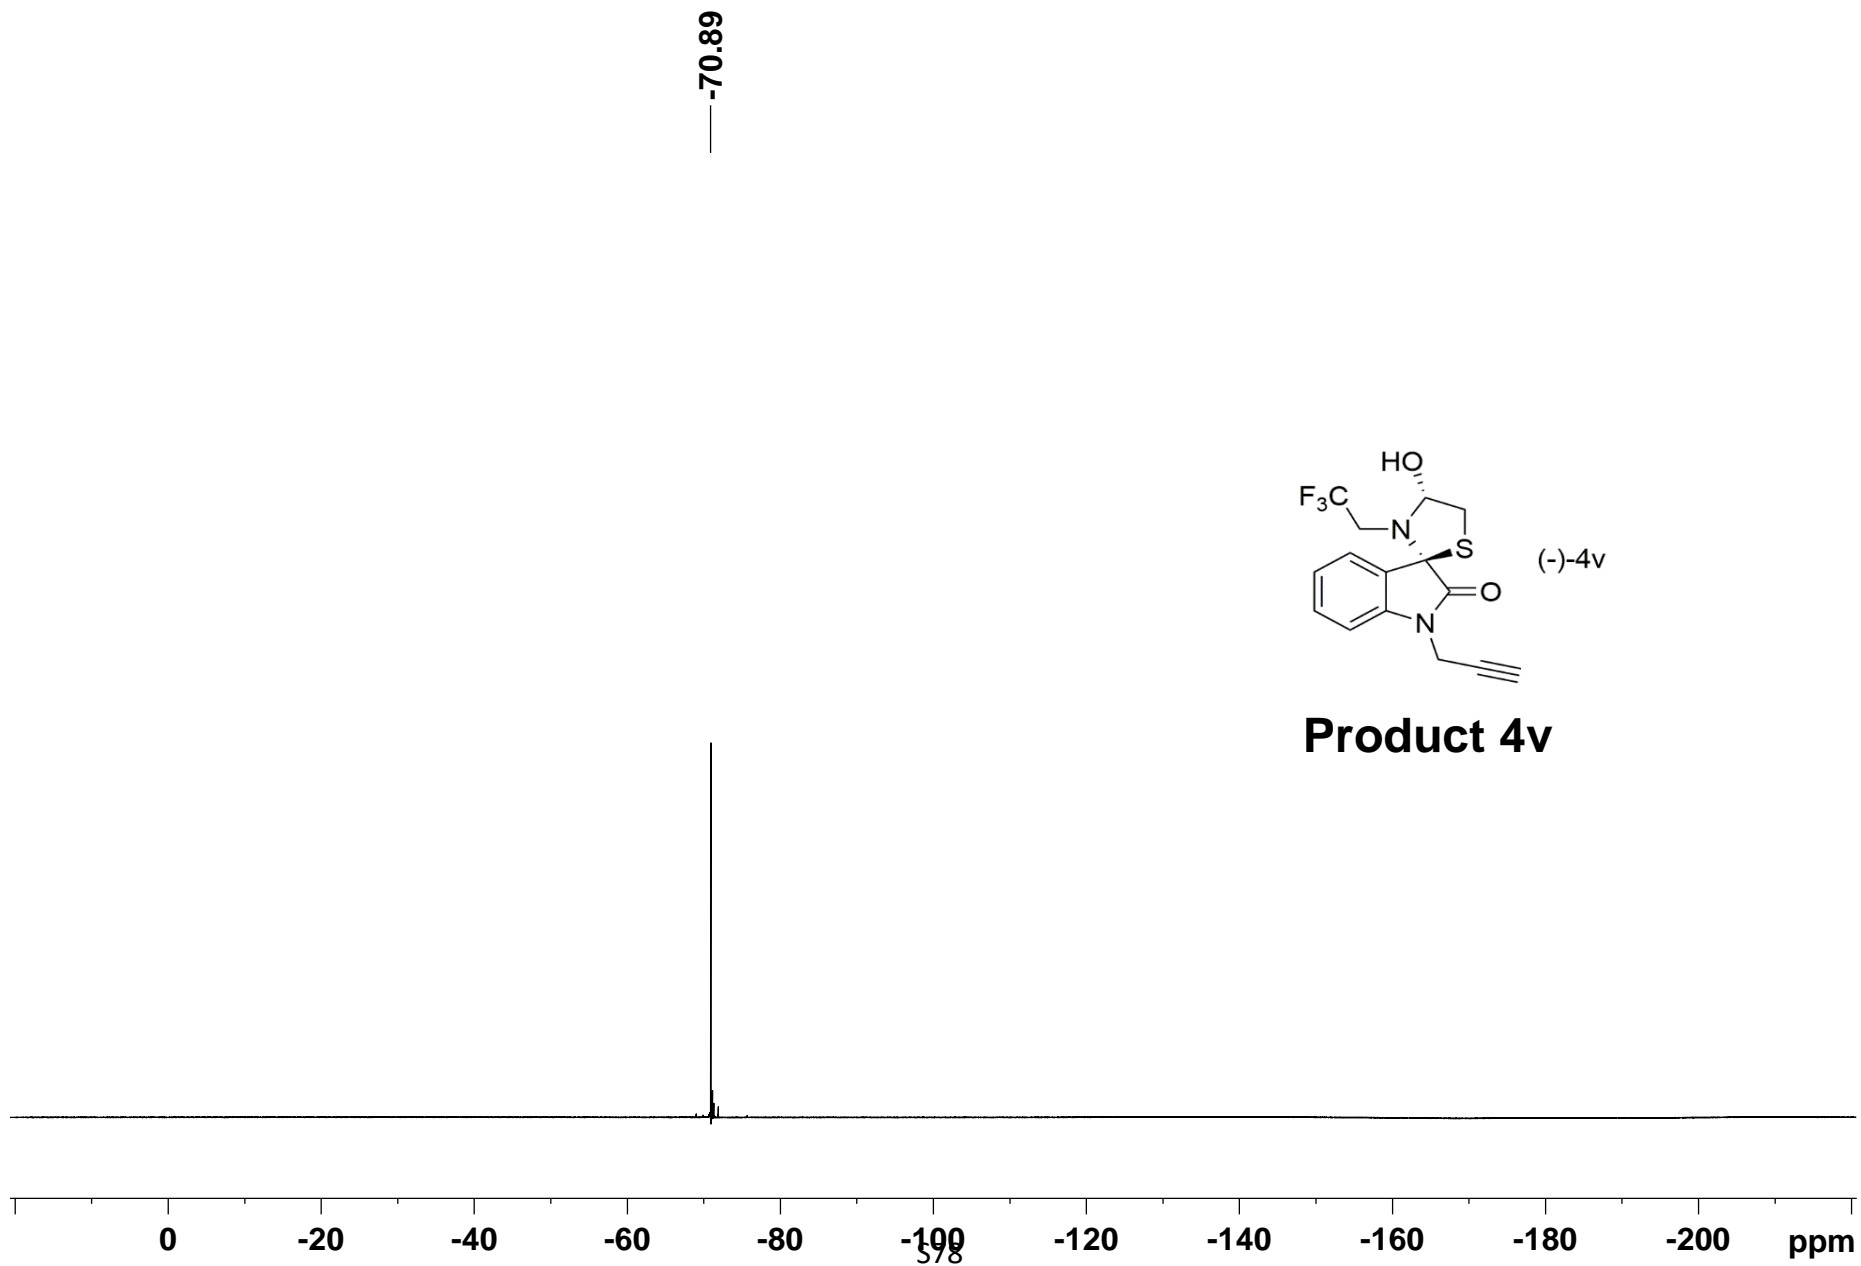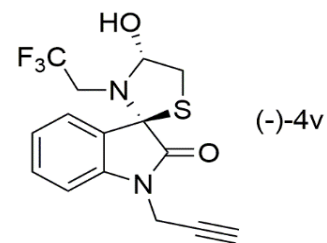

**Product 4v**

7.574  
7.570  
7.556  
7.540  
7.536  
7.482  
7.479  
7.476  
7.465  
7.460  
7.441  
7.416  
7.413  
7.407  
7.395  
7.323  
7.320  
7.304  
7.301  
7.284  
7.281  
7.258  
7.233  
7.231  
7.214  
7.212  
7.195  
7.193  
6.828  
6.809  
5.504  
5.493  
5.439  
5.409  
3.875  
3.854  
3.838  
3.827  
3.815  
3.801  
3.789  
3.408  
3.382  
2.656  
2.632  
2.618  
2.594  
1.628  
1.257  
-0.000

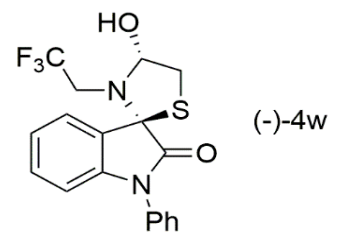

**Product 4w**

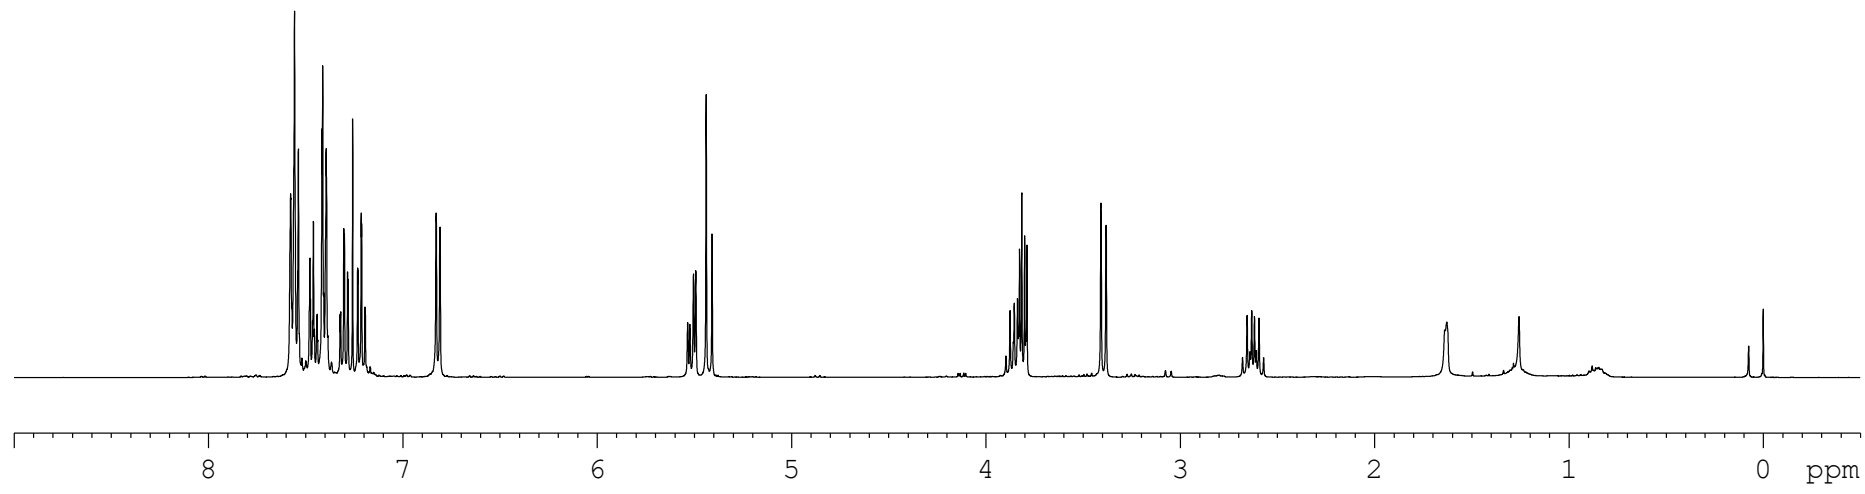

3.056  
1.089  
2.047  
1.087  
1.065  
1.088  
2.014  
S79  
2.019  
1.000  
1.014

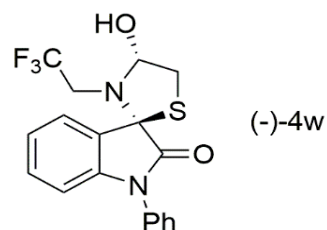

**Product 4w**

177.63

143.25  
133.36  
130.77  
129.86  
128.86  
128.58  
126.78  
126.41  
126.24  
126.03  
125.82  
124.83  
123.05  
120.28  
110.27

88.22  
88.21  
77.37  
77.33  
77.26  
77.05  
76.74

45.11  
44.77  
44.44  
44.10  
40.34

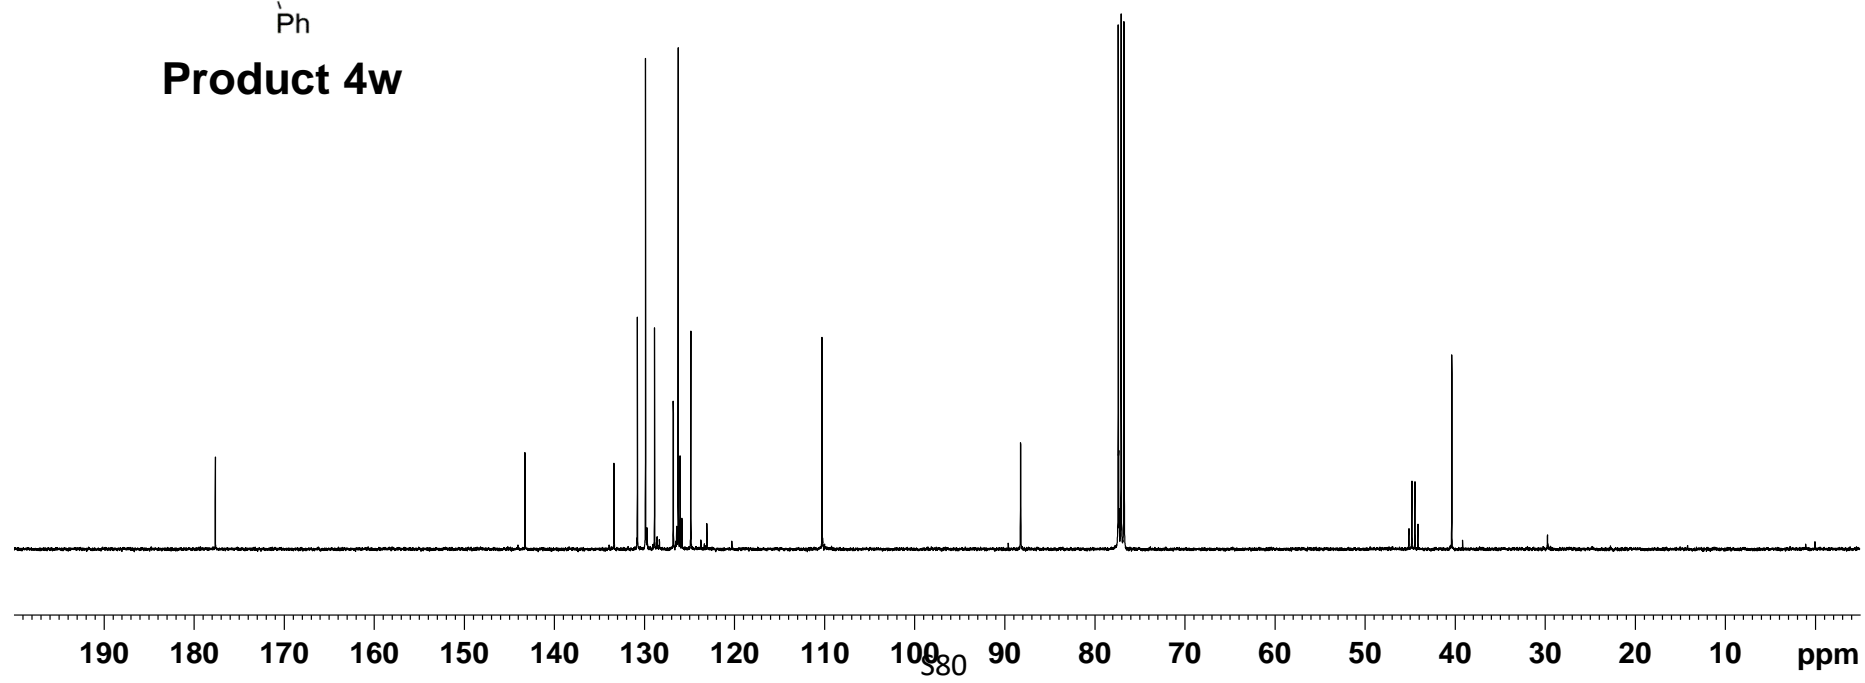



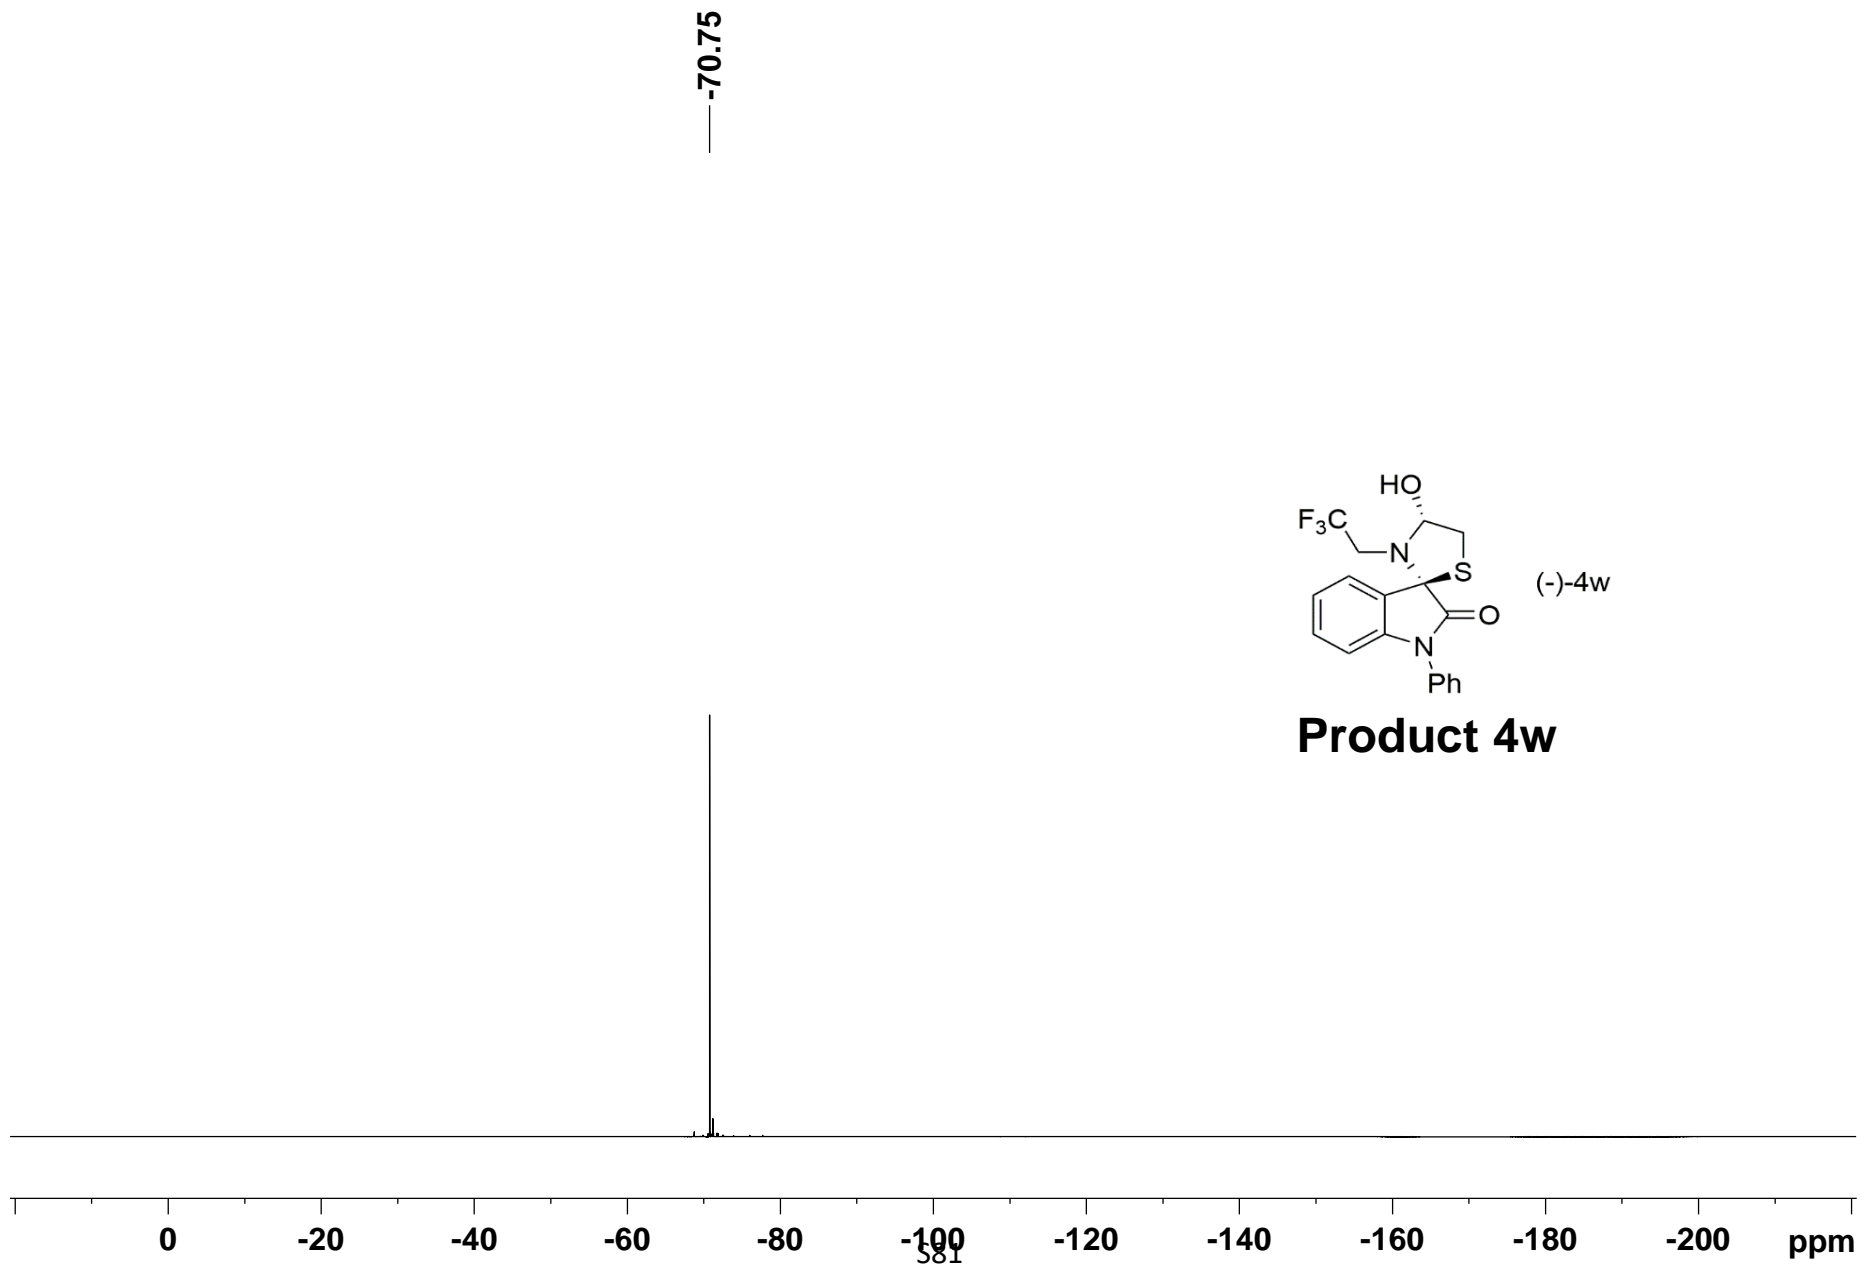

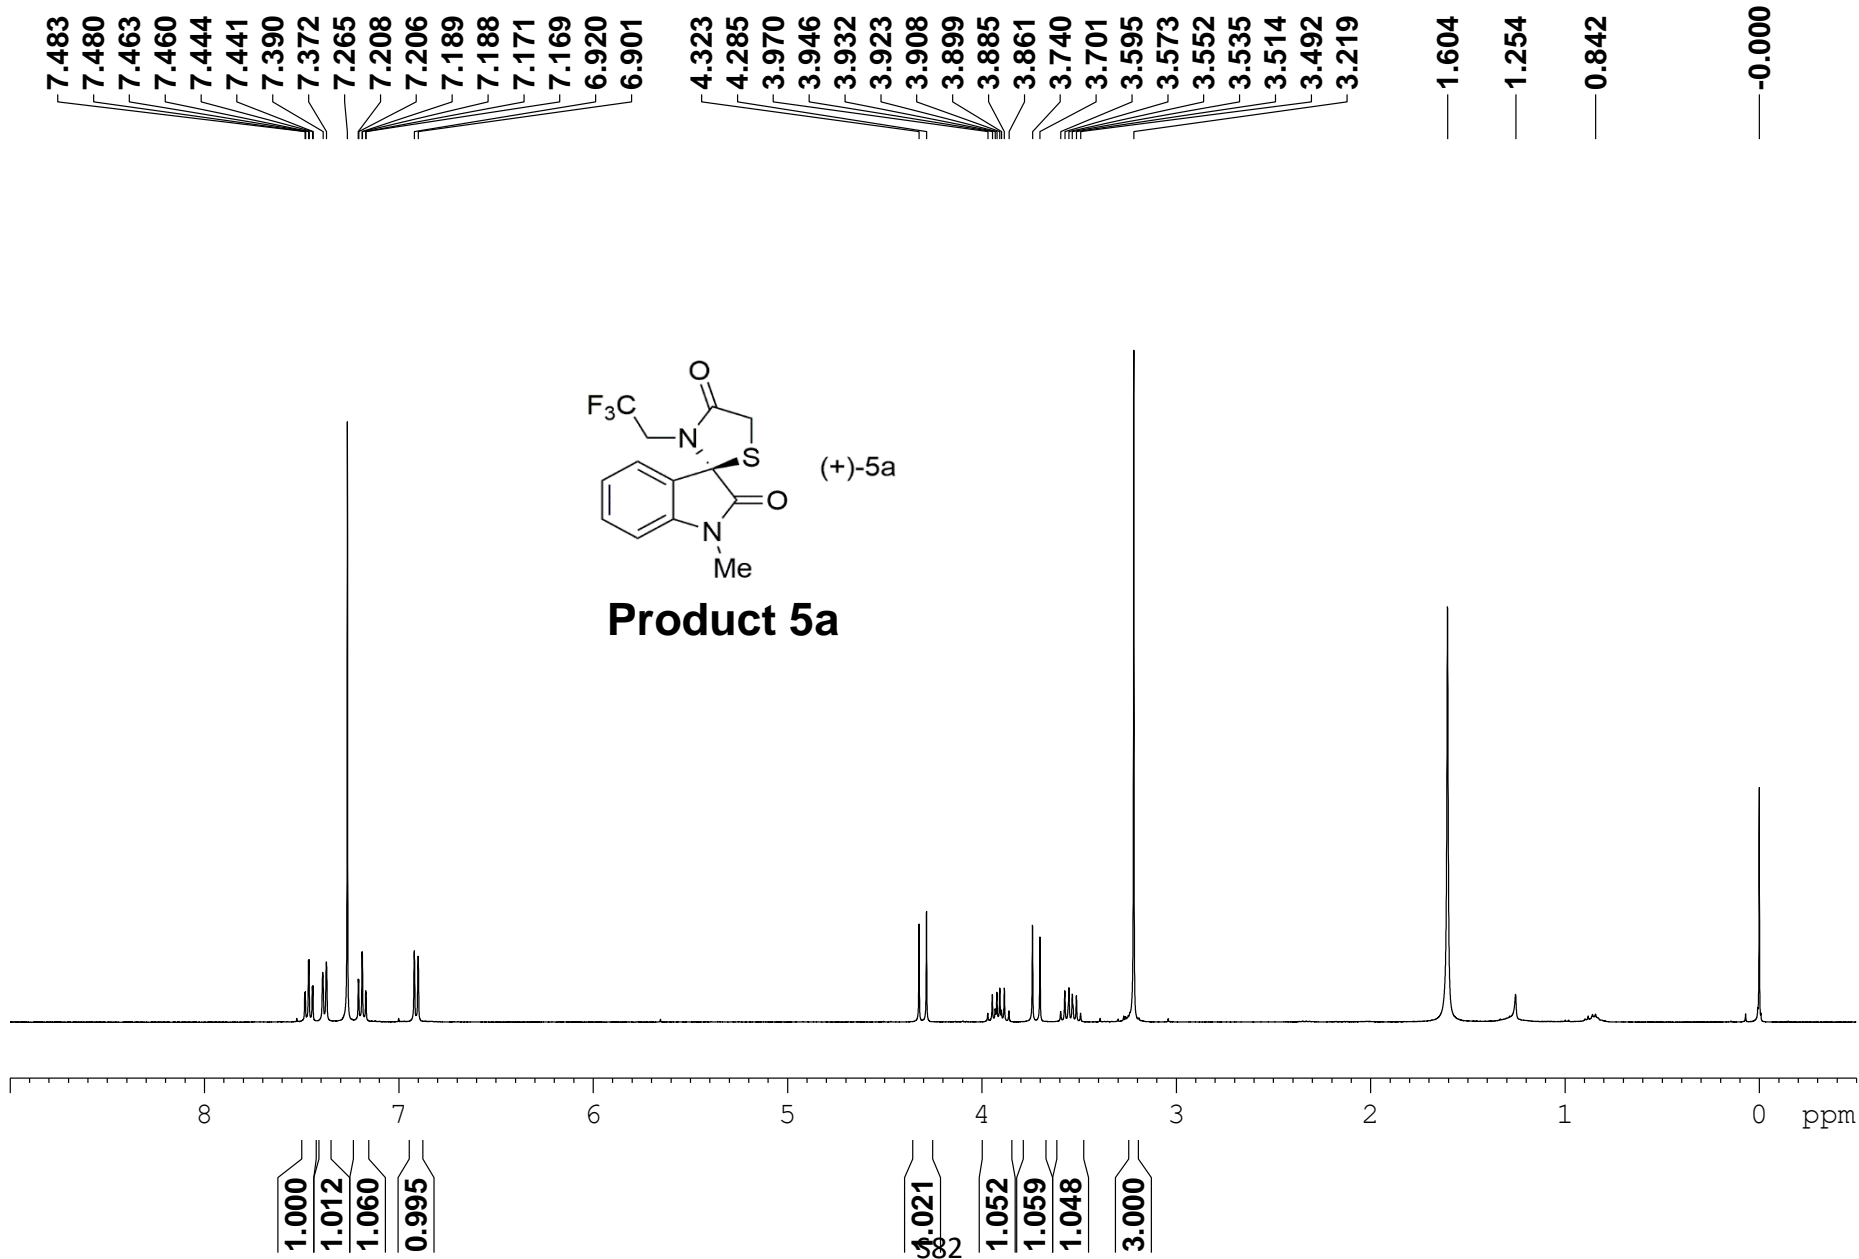

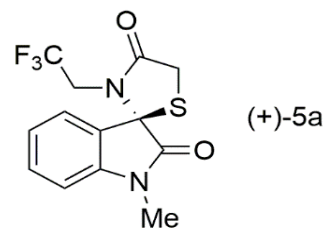

**Product 5a**

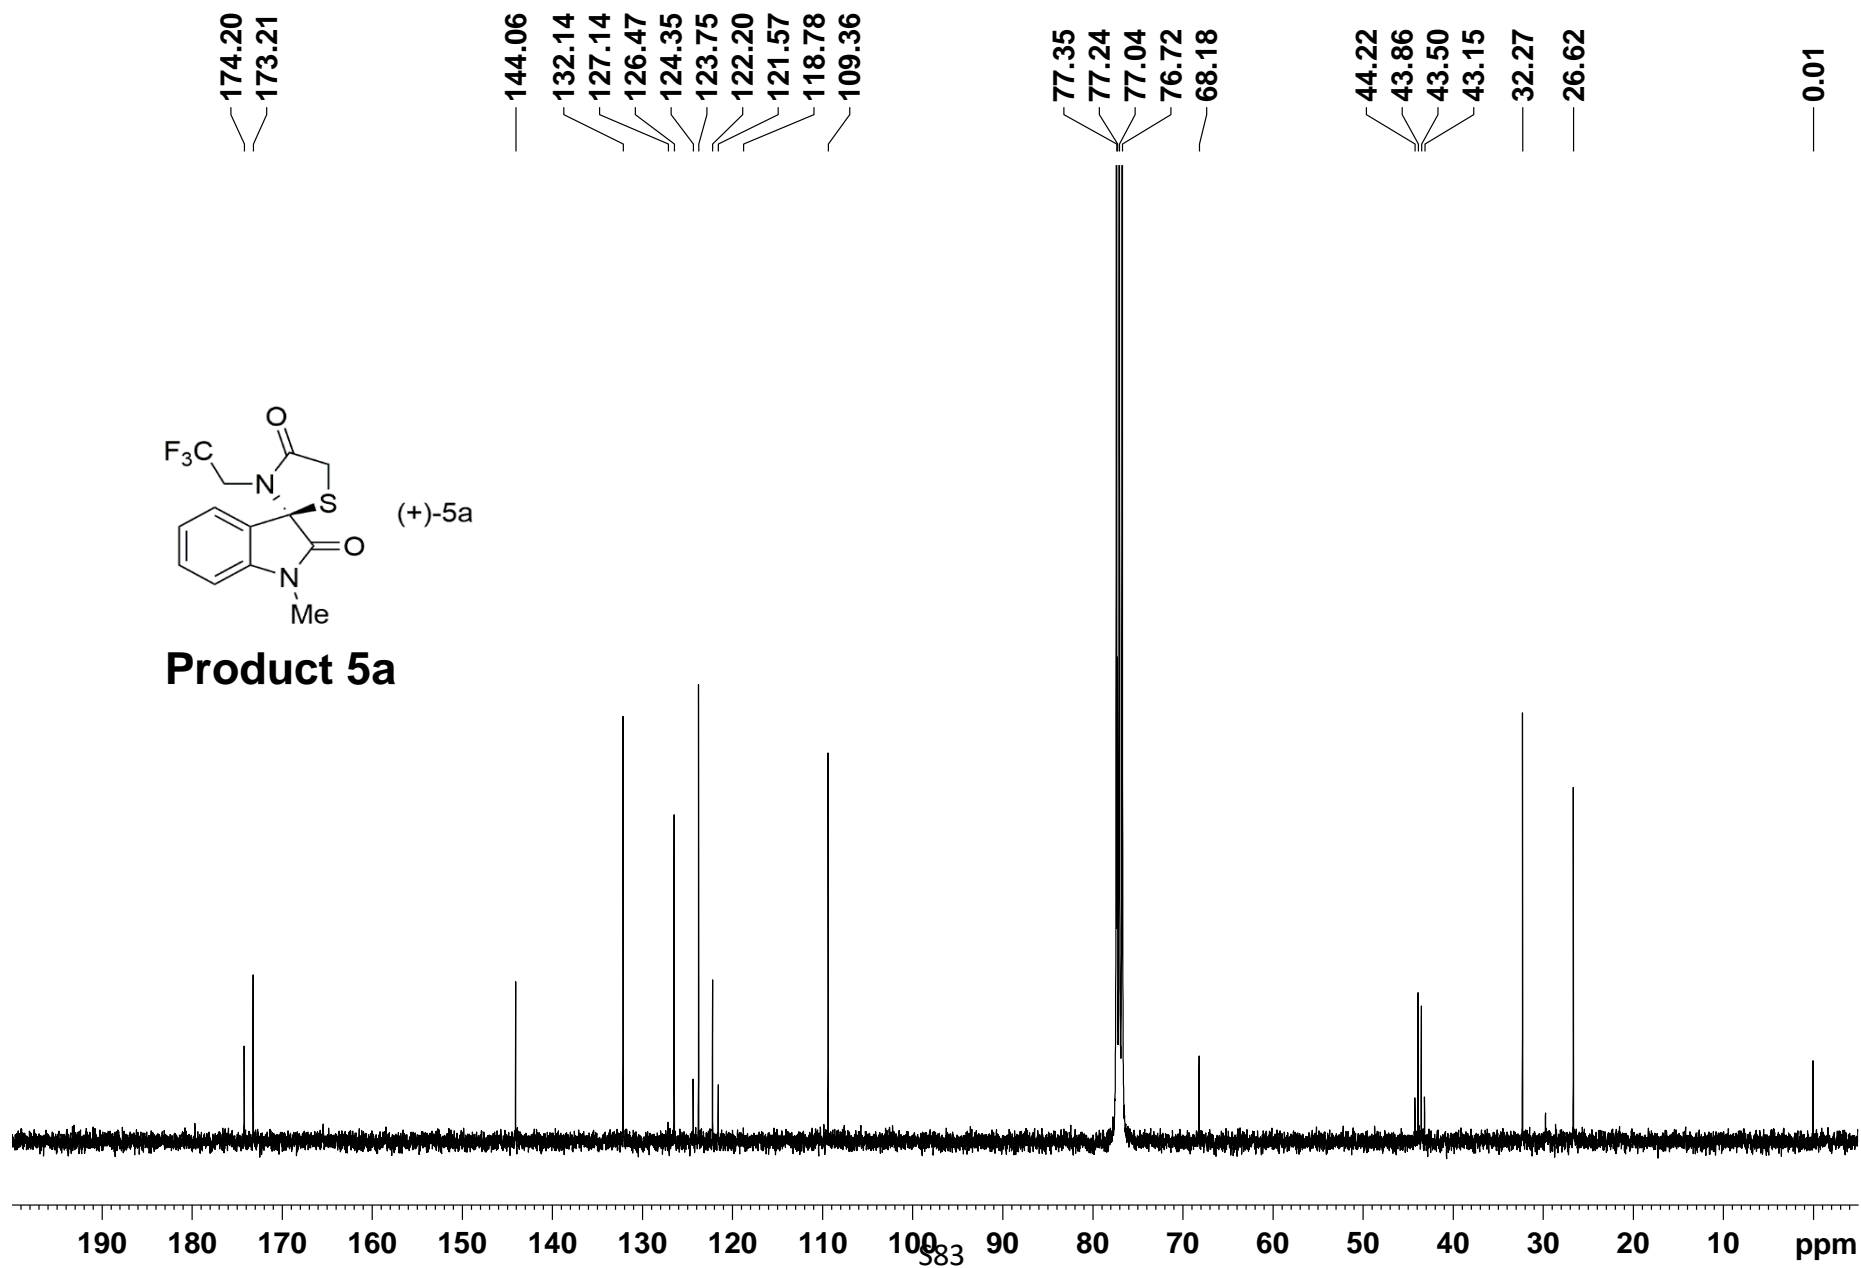

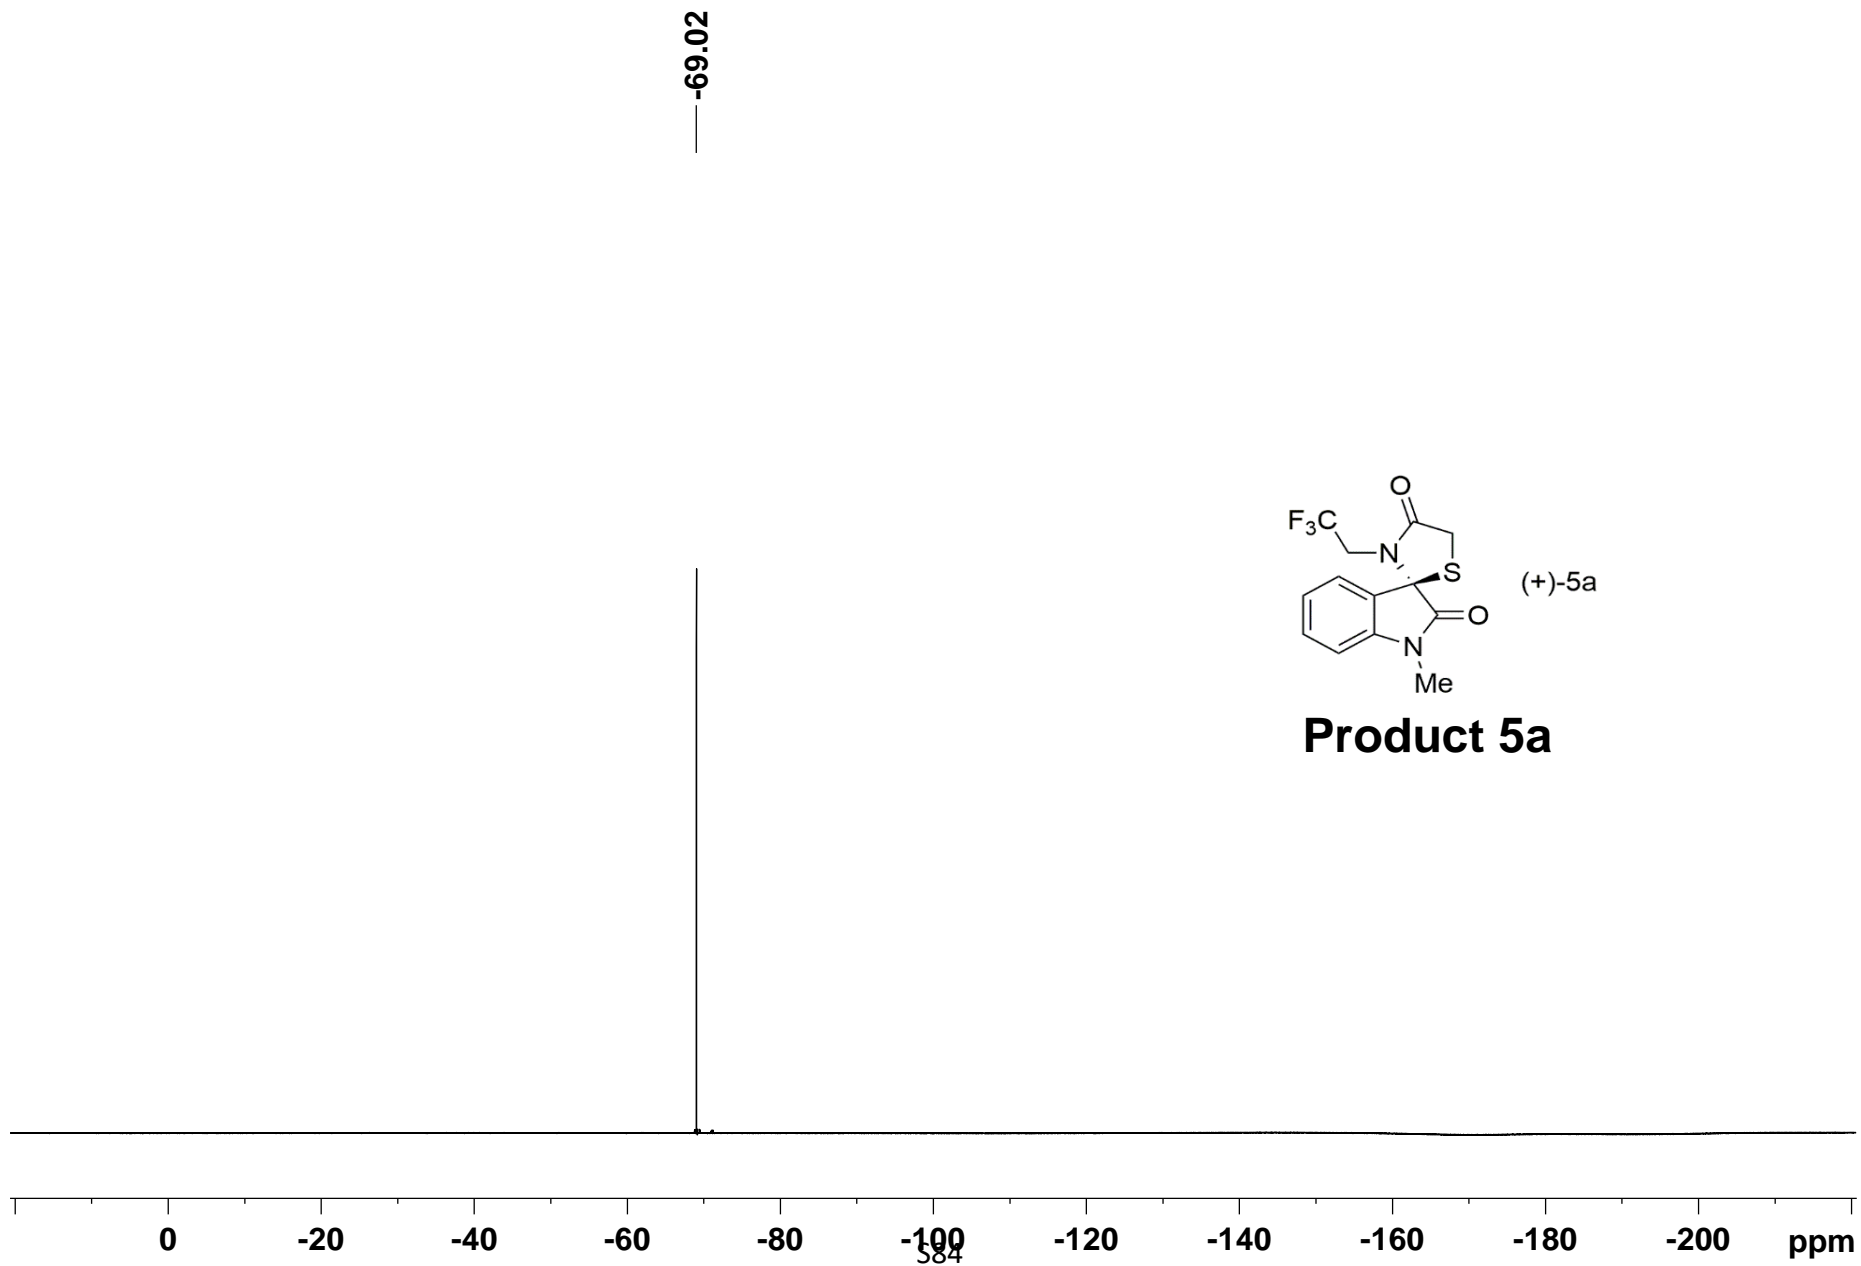

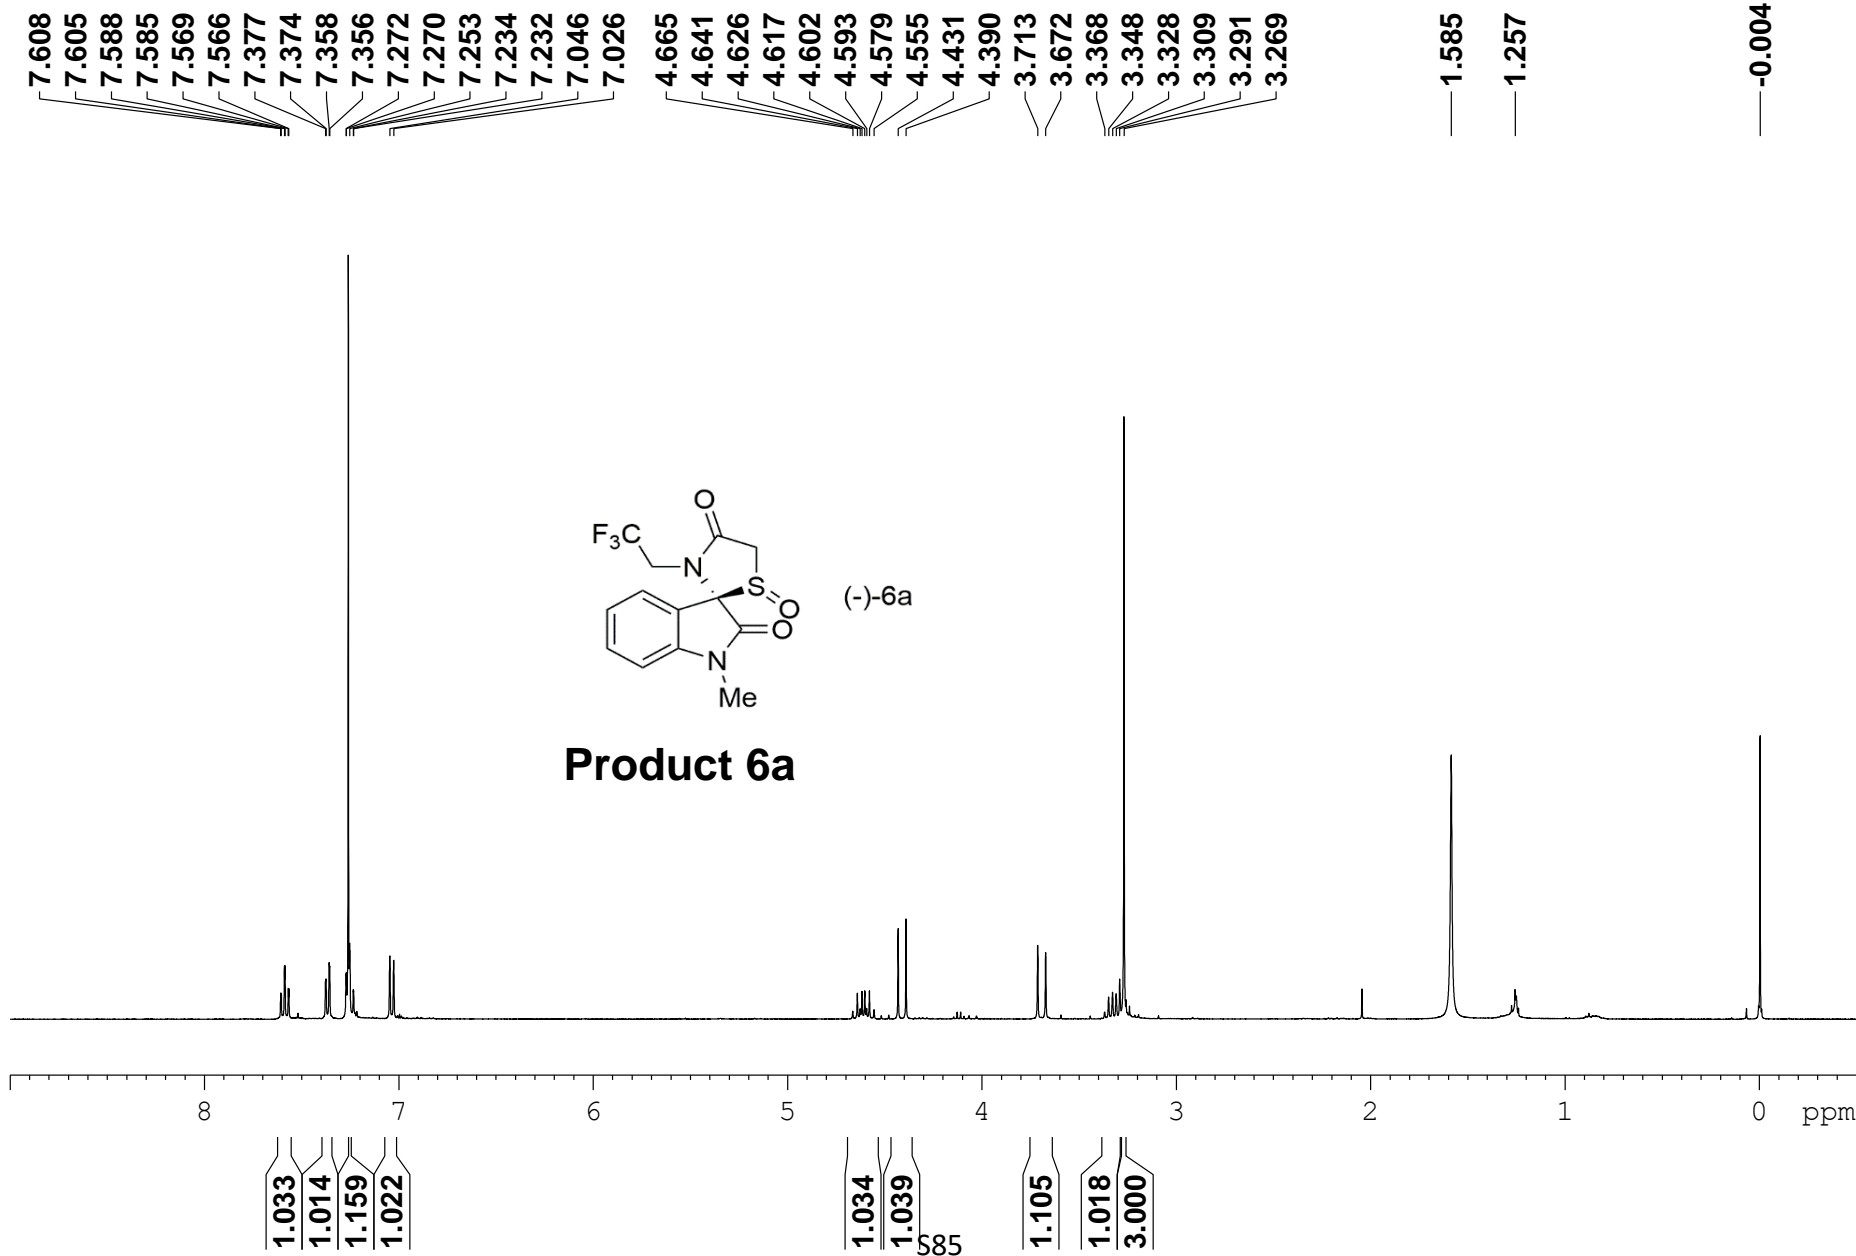

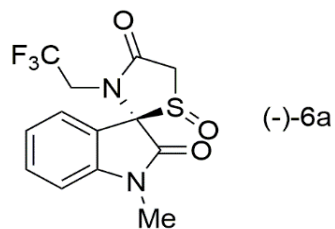

**Product 6a**

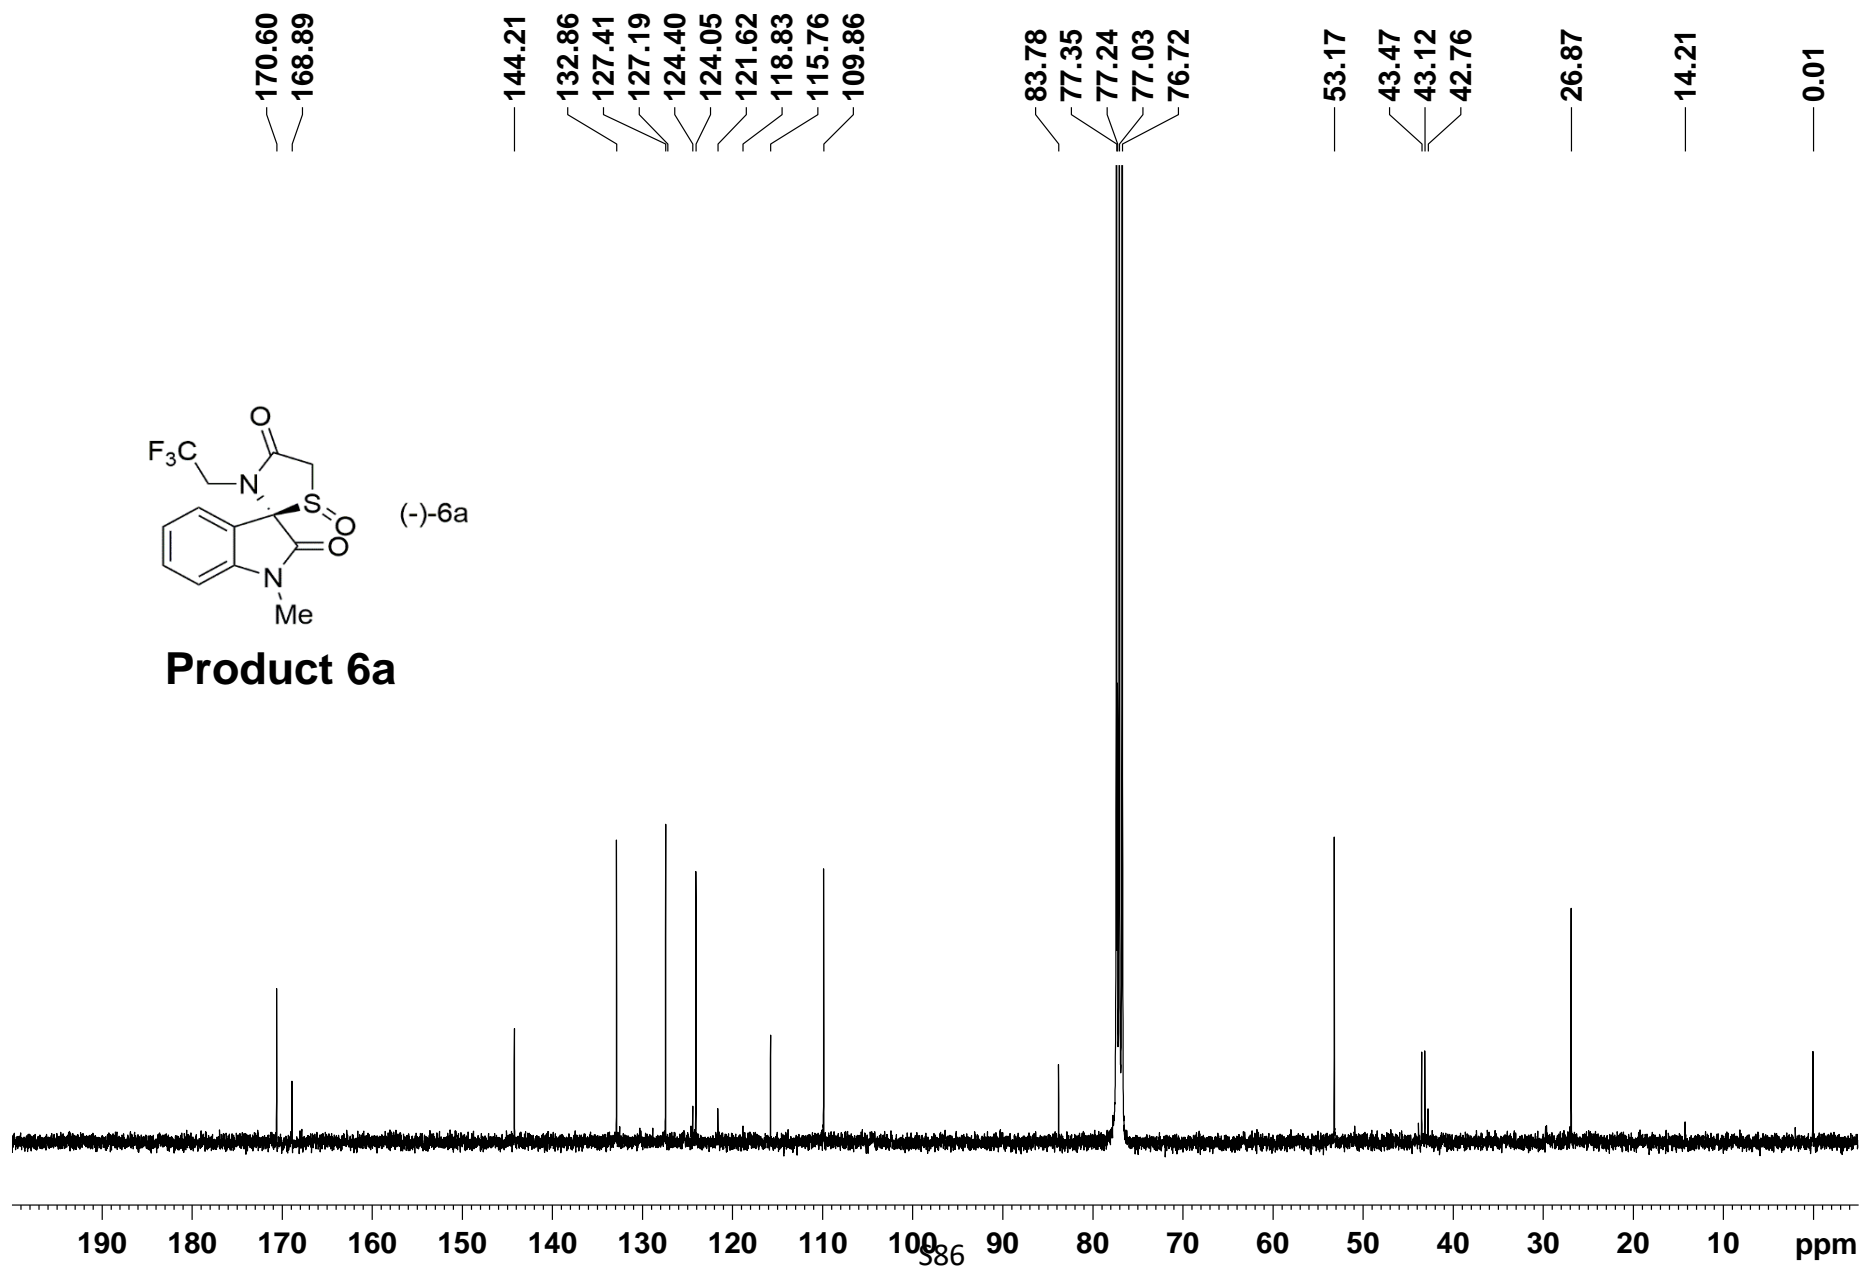

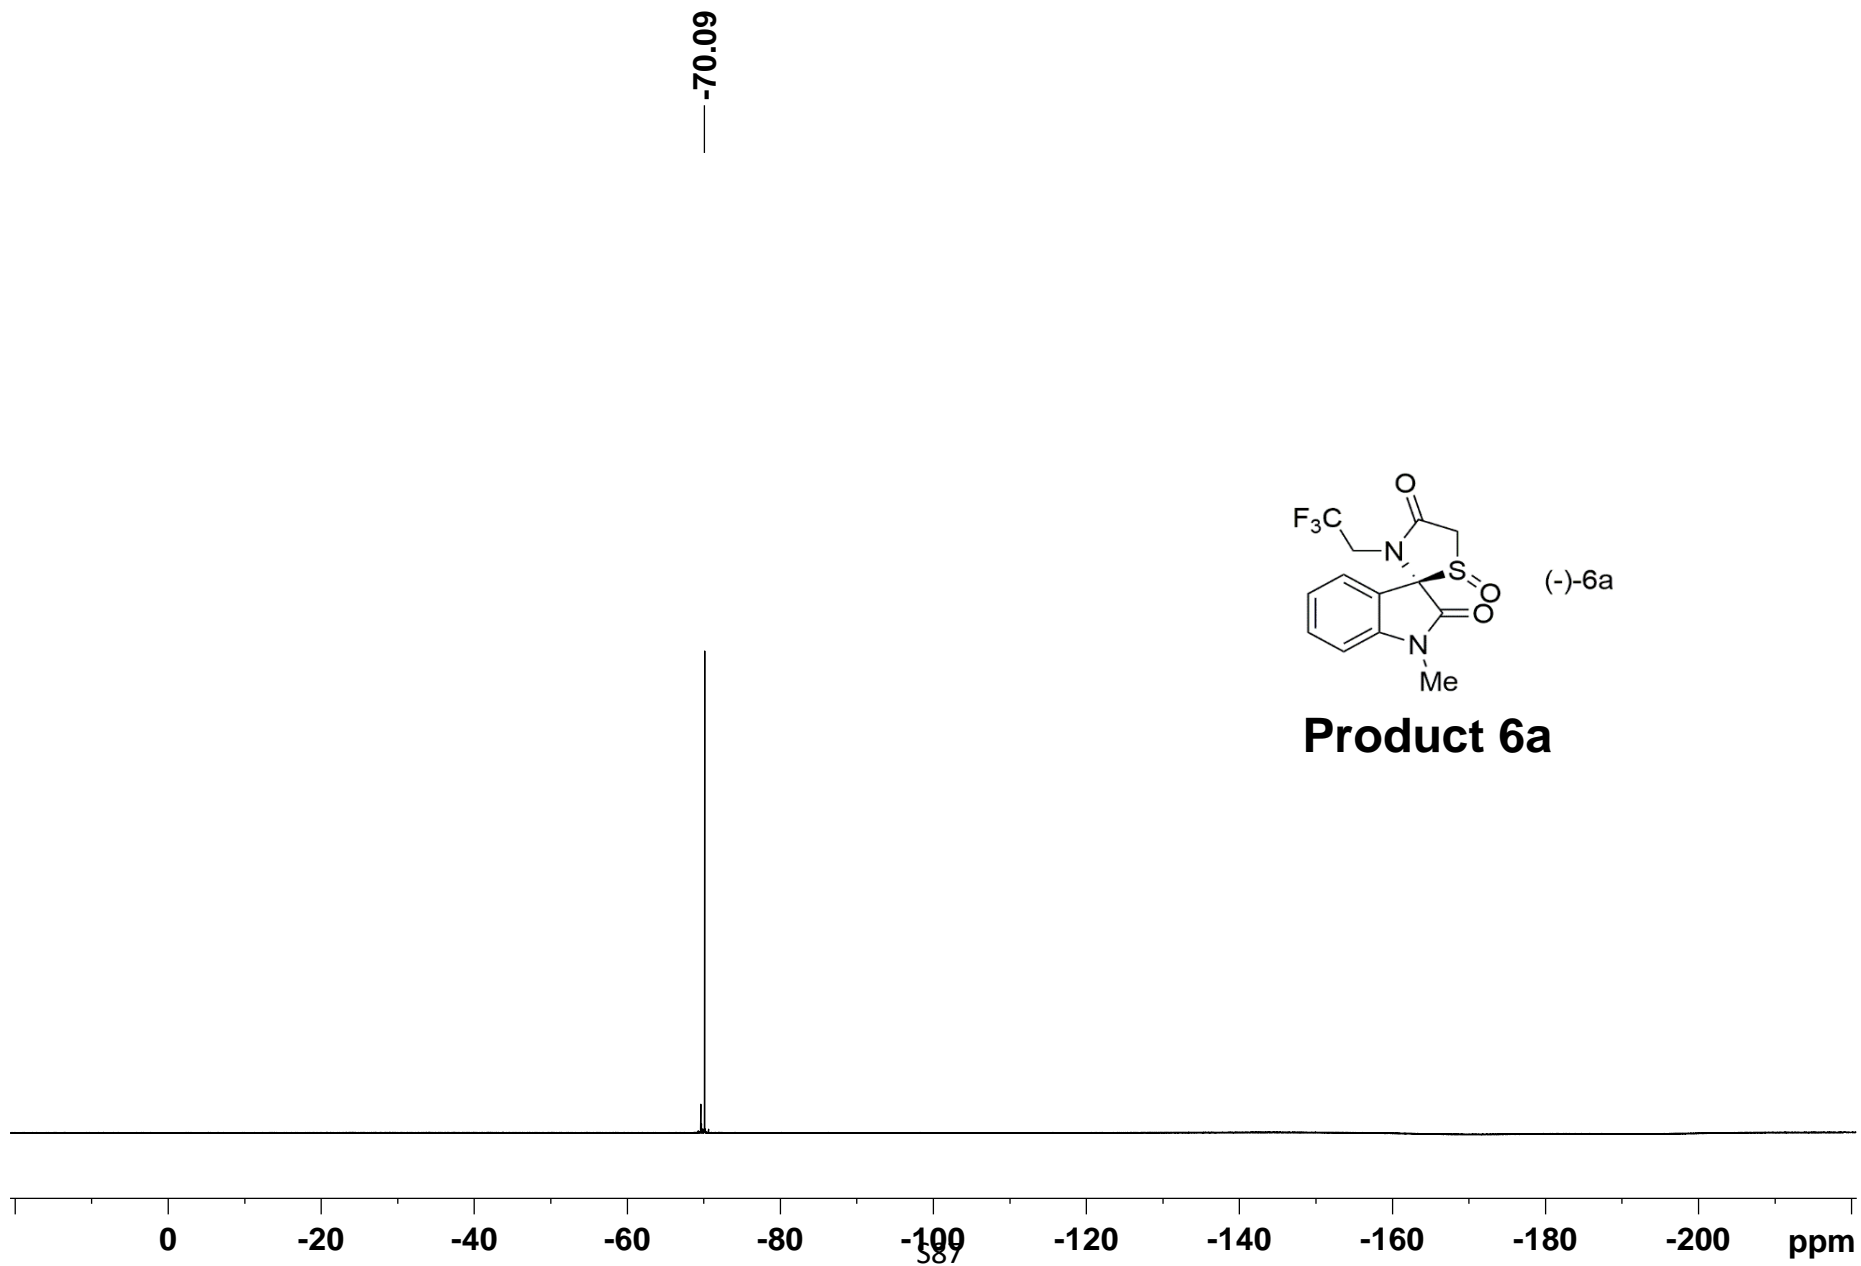

### HPLC of racemic 4a

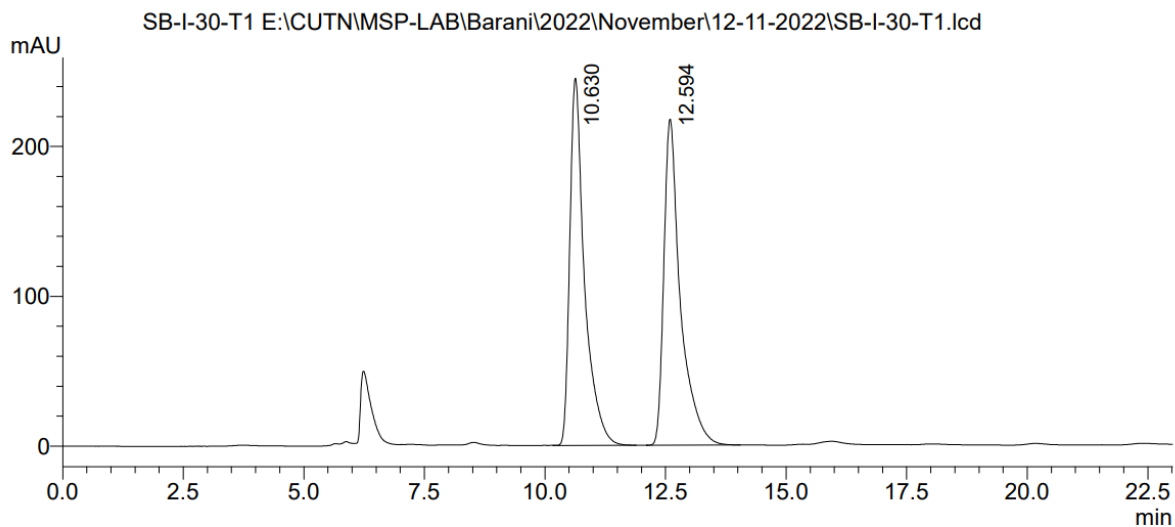

PDA Ch1 254nm

| Peak # | Ret. Time (min) | Area     | Height | Area%   |
|--------|-----------------|----------|--------|---------|
| 1      | 10.630          | 5186567  | 244962 | 49.970  |
| 2      | 12.594          | 5192725  | 217629 | 50.030  |
| Total  |                 | 10379292 | 462592 | 100.000 |

### HPLC of chiral 4a: 95% ee

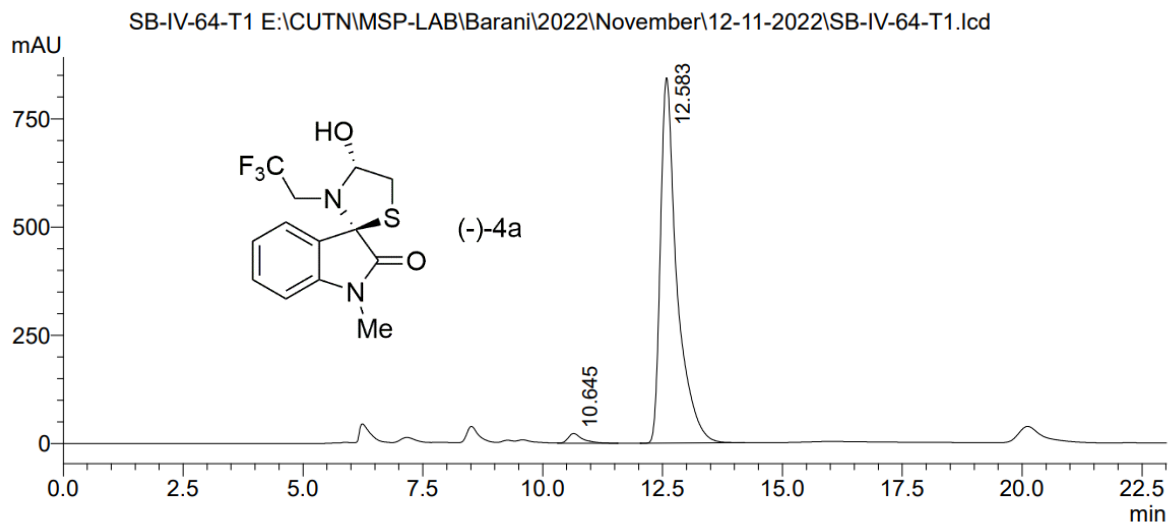

PDA Ch1 254nm

| Peak # | Ret. Time (min) | Area     | Height | Area%   |
|--------|-----------------|----------|--------|---------|
| 1      | 10.645          | 473594   | 22574  | 2.289   |
| 2      | 12.583          | 20214138 | 843719 | 97.711  |
| Total  |                 | 20687732 | 866294 | 100.000 |



### HPLC of racemic **4b**

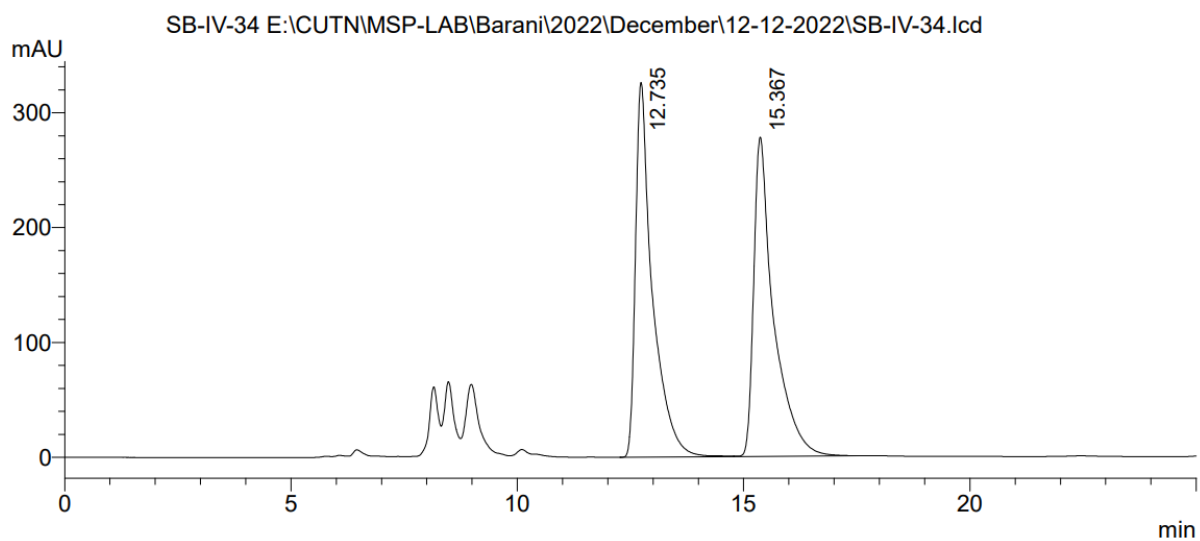

PDA Ch1 254nm

| Peak # | Ret. Time (min) | Area     | Height | Area%   |
|--------|-----------------|----------|--------|---------|
| 1      | 12.735          | 8469528  | 326293 | 49.946  |
| 2      | 15.367          | 8487920  | 278111 | 50.054  |
| Total  |                 | 16957448 | 604404 | 100.000 |

### HPLC of chiral **4b**: 99% *ee*

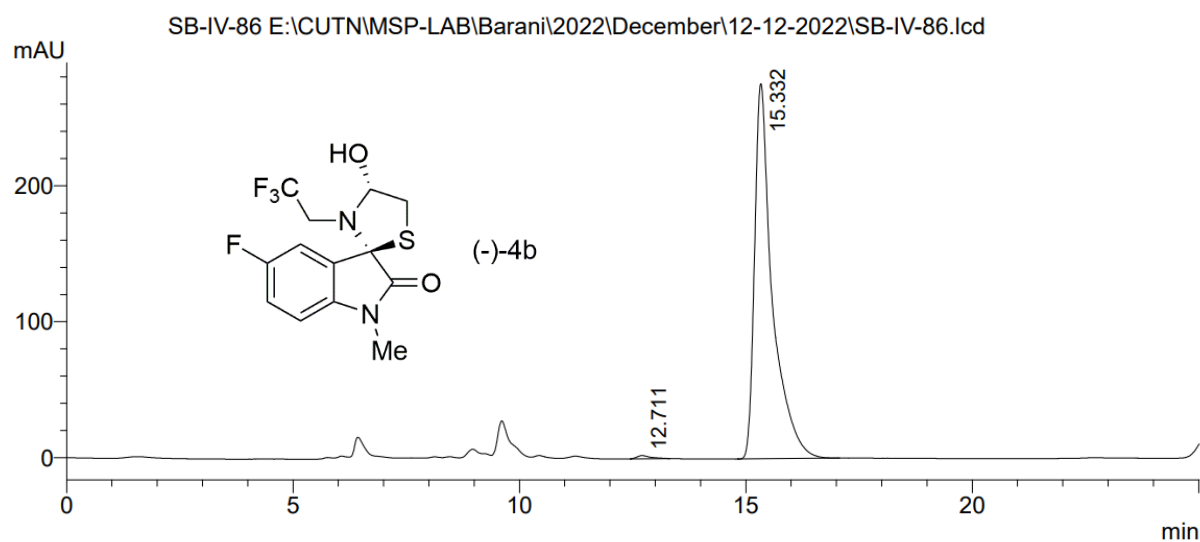

PDA Ch1 254nm

| Peak # | Ret. Time (min) | Area    | Height | Area%   |
|--------|-----------------|---------|--------|---------|
| 1      | 12.711          | 48687   | 2373   | 0.641   |
| 2      | 15.332          | 7545453 | 275682 | 99.359  |
| Total  |                 | 7594139 | 278055 | 100.000 |

### HPLC of racemic **4c**

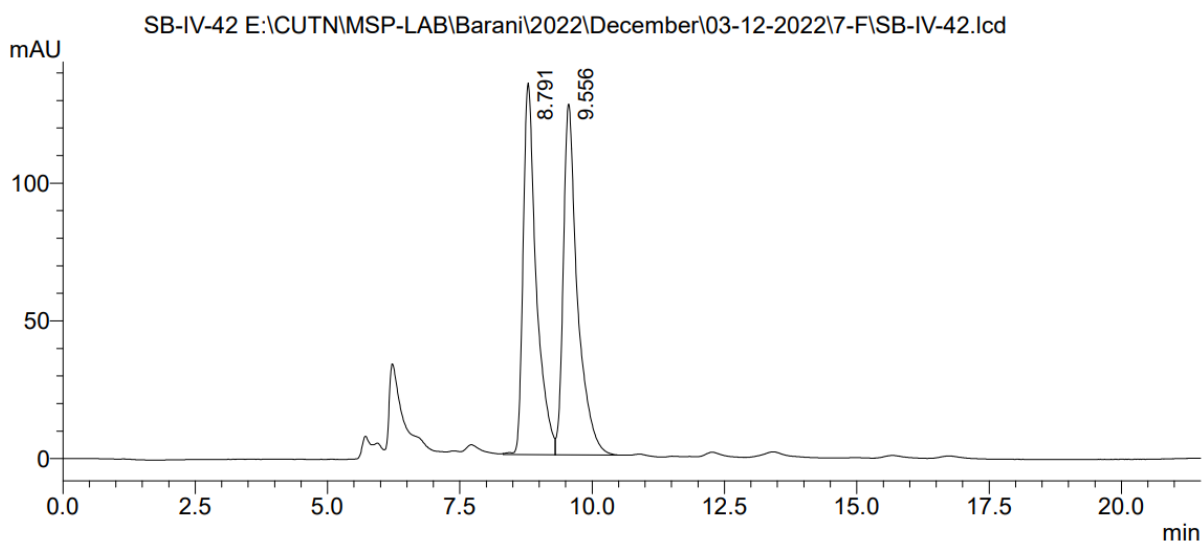

PDA Ch1 254nm

| Peak # | Ret. Time (min) | Area    | Height | Area%   |
|--------|-----------------|---------|--------|---------|
| 1      | 8.791           | 2328379 | 134847 | 49.518  |
| 2      | 9.556           | 2373697 | 127316 | 50.482  |
| Total  |                 | 4702076 | 262163 | 100.000 |

### HPLC of chiral **4c**: 91% ee

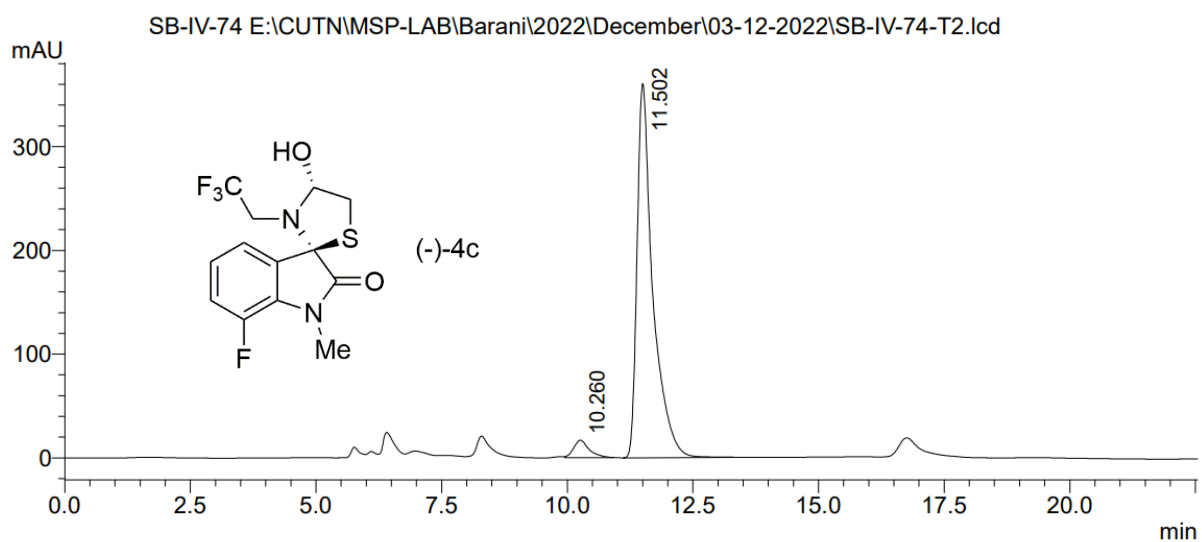

PDA Ch1 254nm

| Peak # | Ret. Time (min) | Area    | Height | Area%   |
|--------|-----------------|---------|--------|---------|
| 1      | 10.260          | 365441  | 16931  | 4.441   |
| 2      | 11.502          | 7863195 | 360393 | 95.559  |
| Total  |                 | 8228637 | 377324 | 100.000 |

### HPLC of racemic **4d**

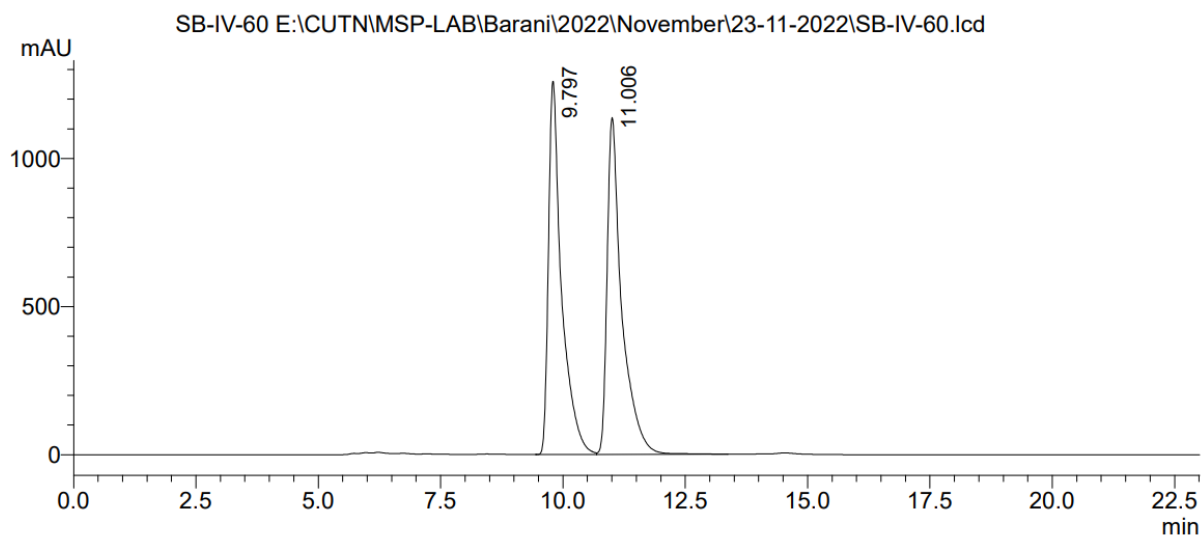

PDA Ch1 254nm

| Peak # | Ret. Time (min) | Area     | Height  | Area%   |
|--------|-----------------|----------|---------|---------|
| 1      | 9.797           | 23523515 | 1259616 | 49.766  |
| 2      | 11.006          | 23744977 | 1136993 | 50.234  |
| Total  |                 | 47268492 | 2396609 | 100.000 |

### HPLC of chiral **4d**: 87% *ee*

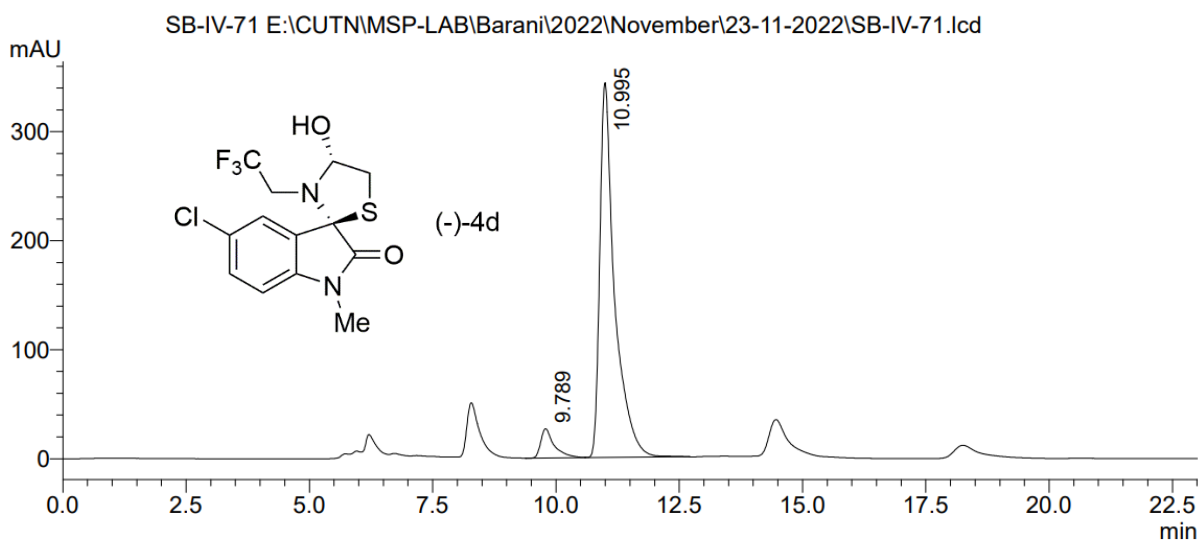

PDA Ch1 254nm

| Peak # | Ret. Time (min) | Area    | Height | Area%   |
|--------|-----------------|---------|--------|---------|
| 1      | 9.789           | 510647  | 26889  | 6.622   |
| 2      | 10.995          | 7201049 | 343794 | 93.378  |
| Total  |                 | 7711697 | 370683 | 100.000 |

### HPLC of racemic **4e**

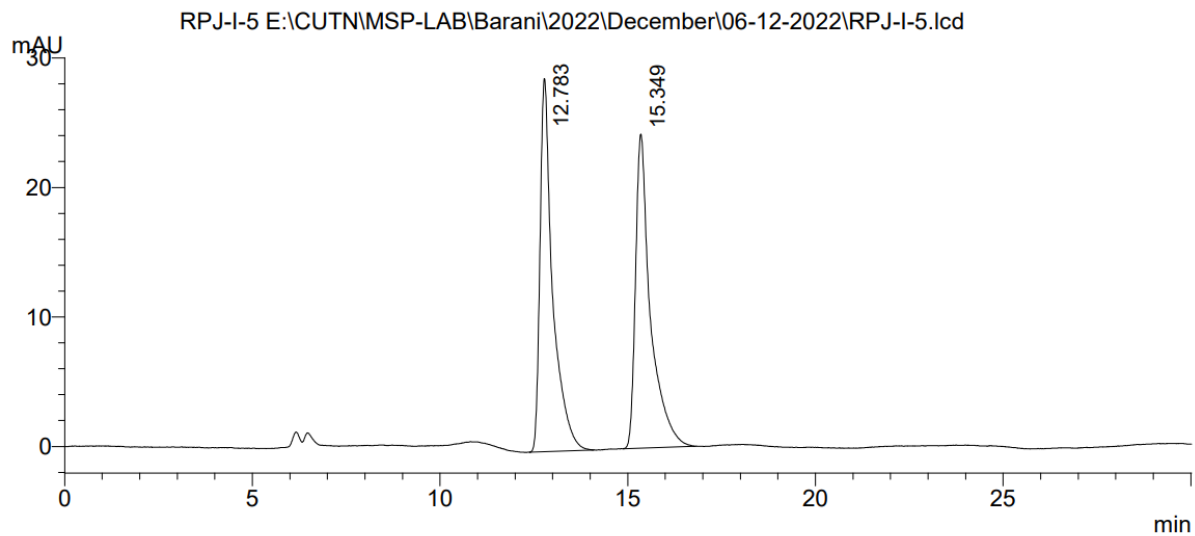

PDA Ch1 254nm

| Peak # | Ret. Time (min) | Area    | Height | Area%   |
|--------|-----------------|---------|--------|---------|
| 1      | 12.783          | 674801  | 28818  | 50.244  |
| 2      | 15.349          | 668236  | 24245  | 49.756  |
| Total  |                 | 1343037 | 53063  | 100.000 |

### HPLC of chiral **4e**: 87% *ee*

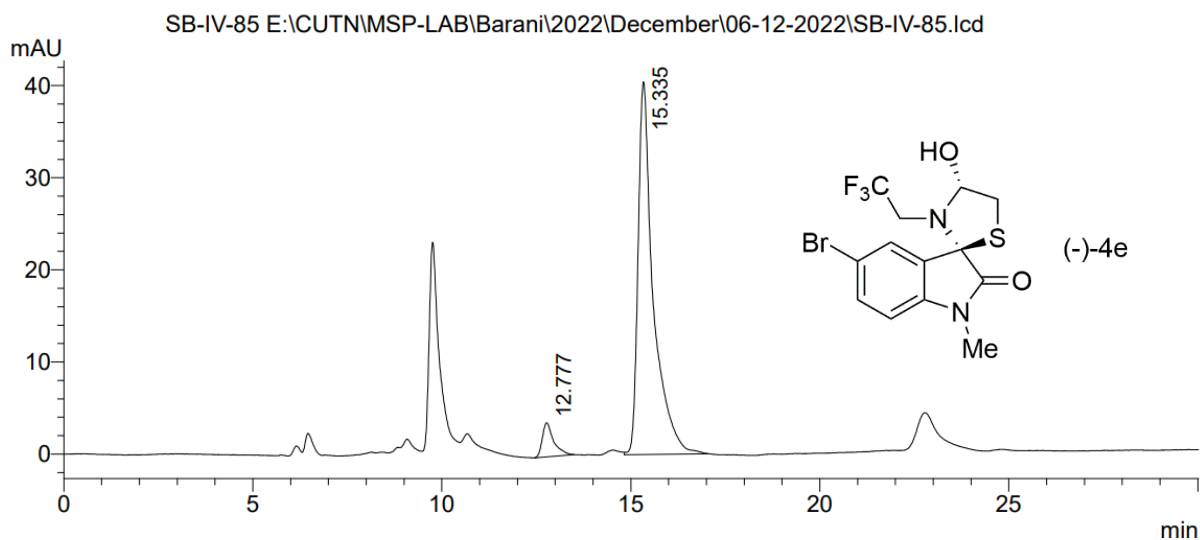

PDA Ch1 254nm

| Peak # | Ret. Time (min) | Area    | Height | Area%   |
|--------|-----------------|---------|--------|---------|
| 1      | 12.777          | 76294   | 3689   | 6.325   |
| 2      | 15.335          | 1129957 | 40457  | 93.675  |
| Total  |                 | 1206250 | 44146  | 100.000 |

### HPLC of racemic **4f**

SB-IV-35 E:\CUTNMSP-LAB\Barani\2022\December\02-12-2022\SB-IV-35.lcd

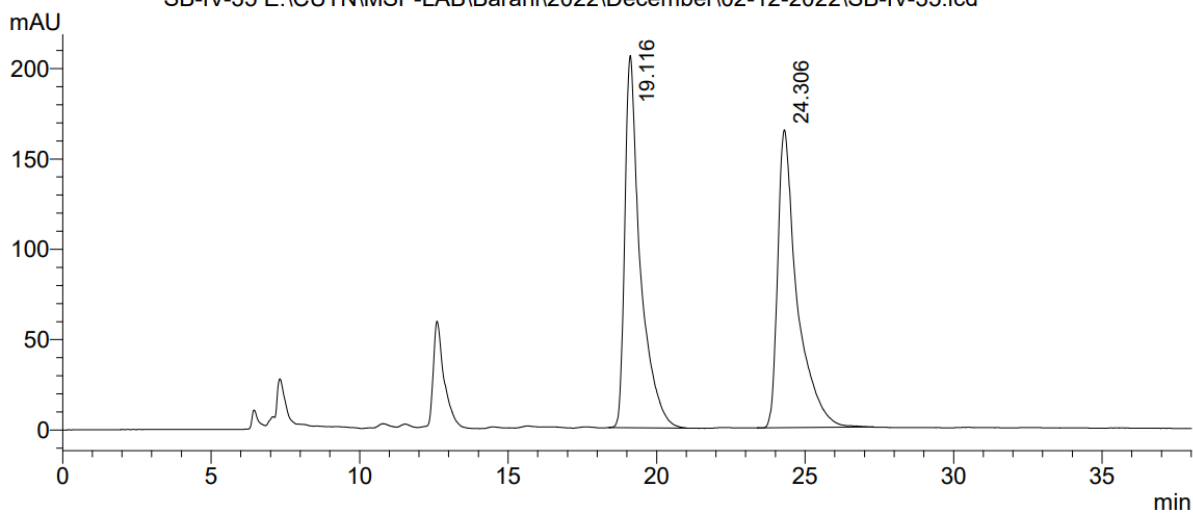

PDA Ch1 254nm

| Peak # | Ret. Time (min) | Area     | Height | Area%   |
|--------|-----------------|----------|--------|---------|
| 1      | 19.116          | 7445503  | 205957 | 49.853  |
| 2      | 24.306          | 7489386  | 164949 | 50.147  |
| Total  |                 | 14934889 | 370905 | 100.000 |

### HPLC of chiral **4f**: 88% *ee*

SB-IV-72 E:\CUTNMSP-LAB\Barani\2022\December\02-12-2022\SB-IV-72.lcd

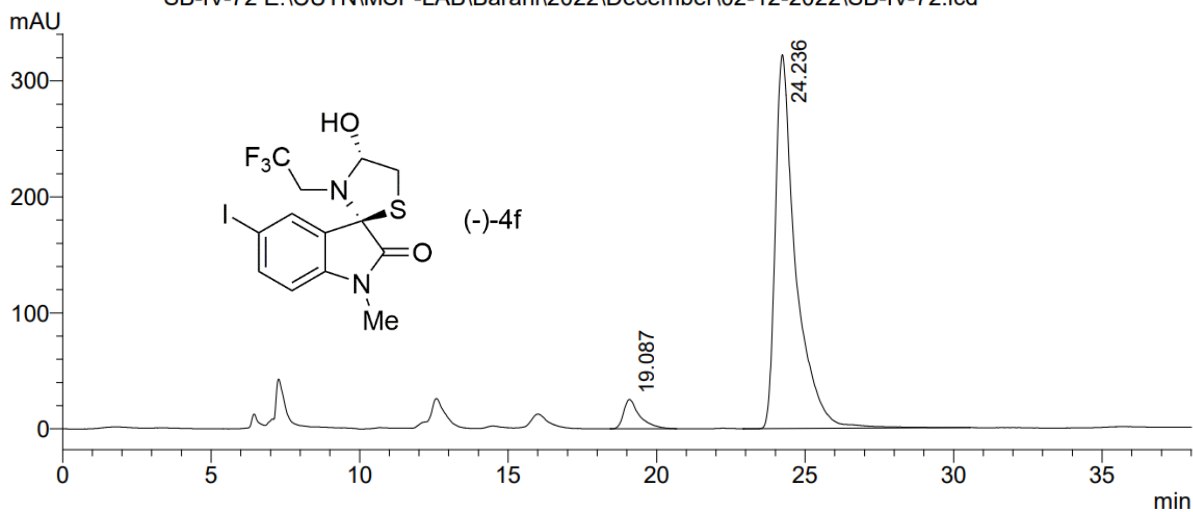

PDA Ch1 254nm

| Peak # | Ret. Time (min) | Area     | Height | Area%   |
|--------|-----------------|----------|--------|---------|
| 1      | 19.087          | 946289   | 25346  | 5.768   |
| 2      | 24.236          | 15460481 | 322281 | 94.232  |
| Total  |                 | 16406770 | 347627 | 100.000 |

## HPLC of racemic **4g**

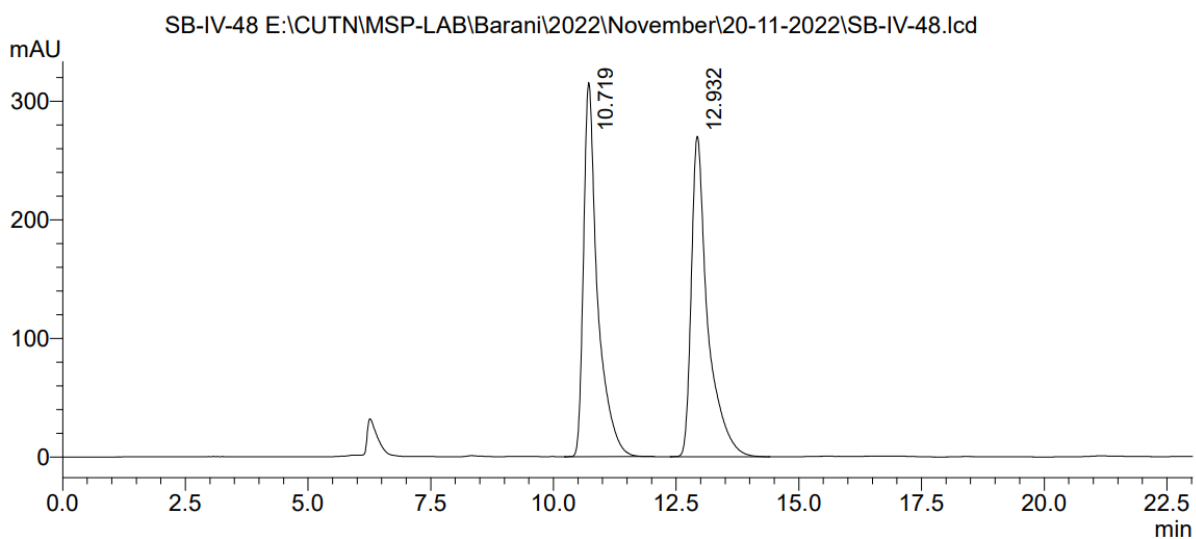

PDA Ch1 254nm

| Peak # | Ret. Time (min) | Area     | Height | Area%   |
|--------|-----------------|----------|--------|---------|
| 1      | 10.719          | 6257613  | 315522 | 49.939  |
| 2      | 12.932          | 6272984  | 270461 | 50.061  |
| Total  |                 | 12530597 | 585983 | 100.000 |

## HPLC of chiral **4g**: 93% ee

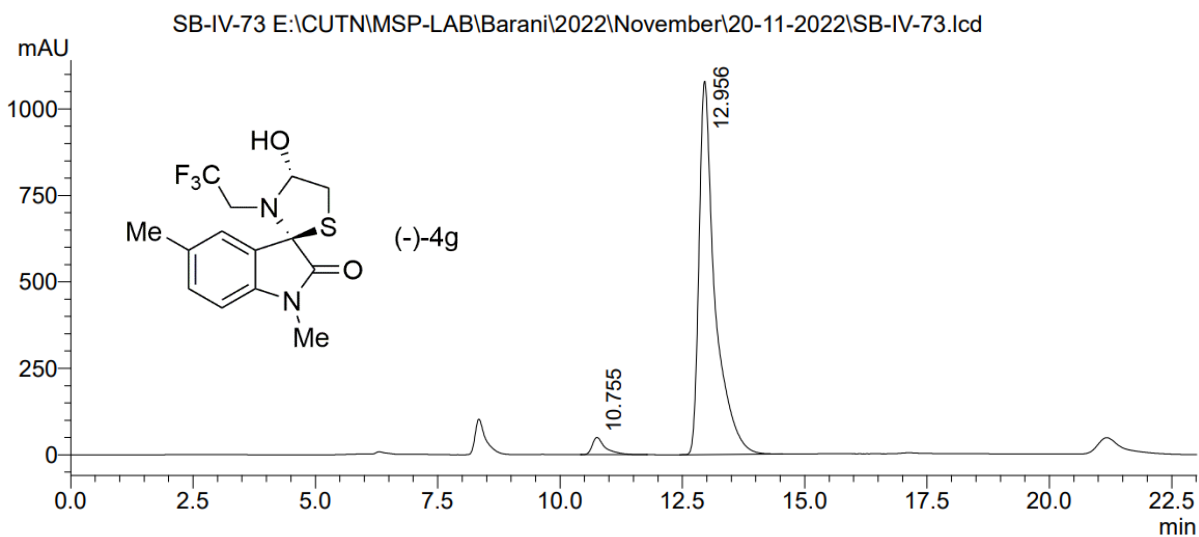

PDA Ch1 254nm

| Peak # | Ret. Time (min) | Area     | Height  | Area%   |
|--------|-----------------|----------|---------|---------|
| 1      | 10.755          | 931881   | 50119   | 3.681   |
| 2      | 12.956          | 24385574 | 1079122 | 96.319  |
| Total  |                 | 25317455 | 1129241 | 100.000 |

### HPLC of racemic **4h**

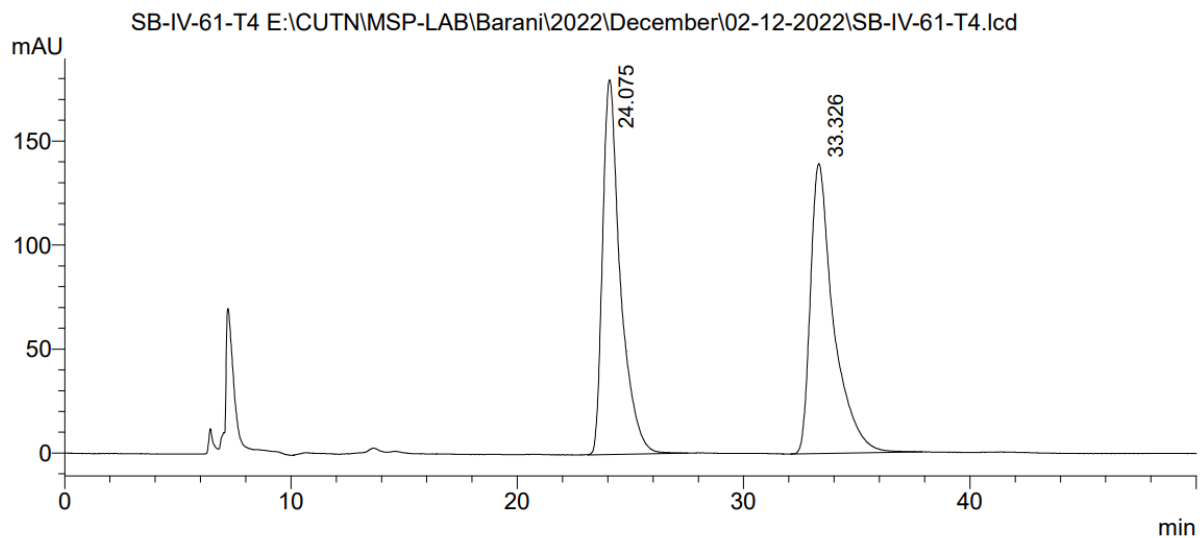

PDA Ch1 254nm

| Peak # | Ret. Time (min) | Area     | Height | Area%   |
|--------|-----------------|----------|--------|---------|
| 1      | 24.075          | 9857041  | 180094 | 49.889  |
| 2      | 33.326          | 9900914  | 139374 | 50.111  |
| Total  |                 | 19757955 | 319468 | 100.000 |

### HPLC of chiral **4h**: 91% *ee*

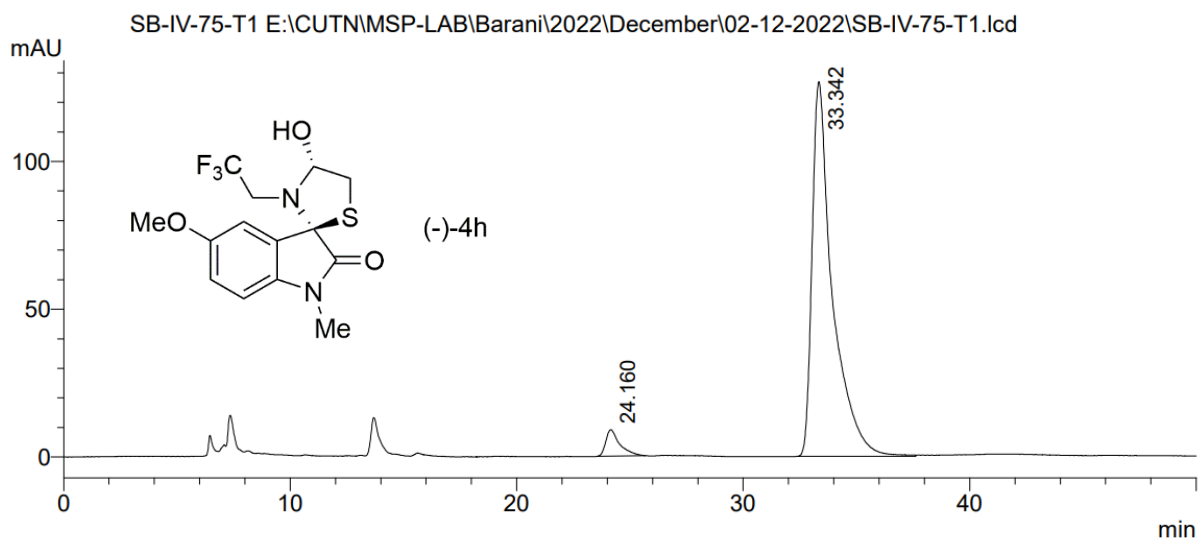

PDA Ch1 254nm

| Peak # | Ret. Time (min) | Area    | Height | Area%   |
|--------|-----------------|---------|--------|---------|
| 1      | 24.160          | 379485  | 8951   | 4.571   |
| 2      | 33.342          | 7921705 | 126764 | 95.429  |
| Total  |                 | 8301190 | 135716 | 100.000 |

### HPLC of racemic **4i**

SB-IV-95 E:\CUTN\MSP-LAB\Barani\2022\December\06-12-2022\SB-IV-95.lcd

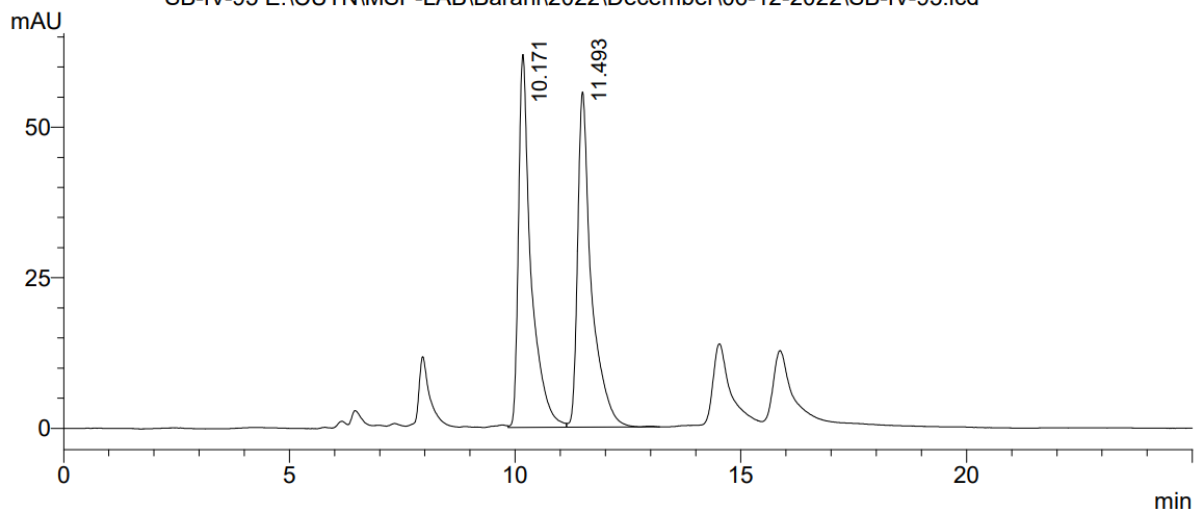

PDA Ch1 254nm

| Peak # | Ret. Time (min) | Area    | Height | Area%   |
|--------|-----------------|---------|--------|---------|
| 1      | 10.171          | 1193412 | 61912  | 50.212  |
| 2      | 11.493          | 1183354 | 55650  | 49.788  |
| Total  |                 | 2376766 | 117562 | 100.000 |

### HPLC of chiral **4i**: 85% *ee*

SB-IV-87 E:\CUTN\MSP-LAB\Barani\2022\December\06-12-2022\SB-IV-87.lcd

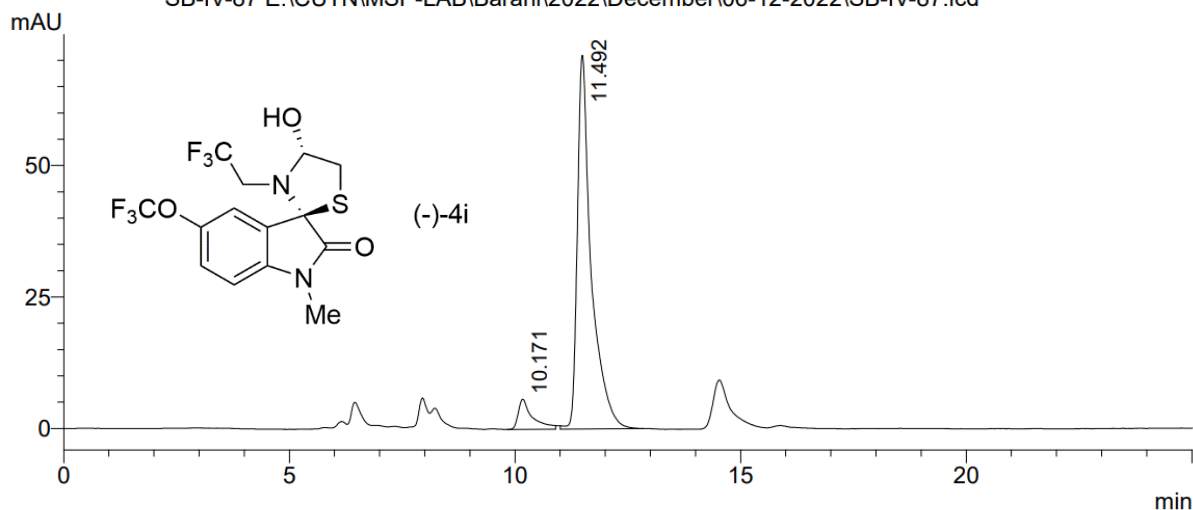

PDA Ch1 254nm

| Peak # | Ret. Time (min) | Area    | Height | Area%   |
|--------|-----------------|---------|--------|---------|
| 1      | 10.171          | 124829  | 5718   | 7.593   |
| 2      | 11.492          | 1519233 | 71048  | 92.407  |
| Total  |                 | 1644062 | 76765  | 100.000 |



### HPLC of racemic **4k**

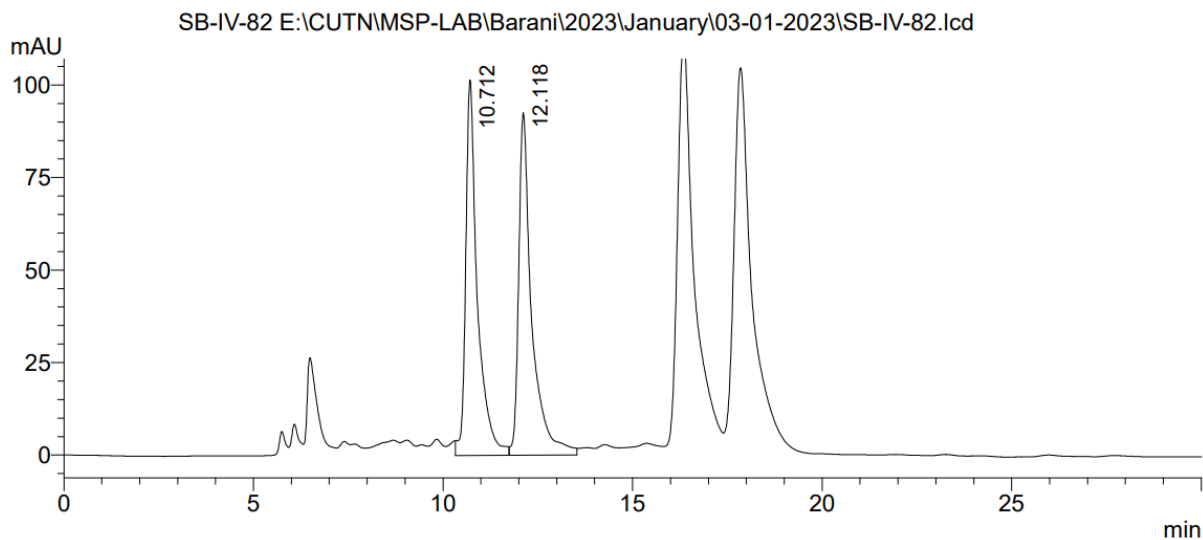

PDA Ch1 254nm

| Peak # | Ret. Time (min) | Area    | Height | Area%   |
|--------|-----------------|---------|--------|---------|
| 1      | 10.712          | 2172979 | 101427 | 49.480  |
| 2      | 12.118          | 2218658 | 92513  | 50.520  |
| Total  |                 | 4391638 | 193940 | 100.000 |

### HPLC of chiral **4k**: 86% ee

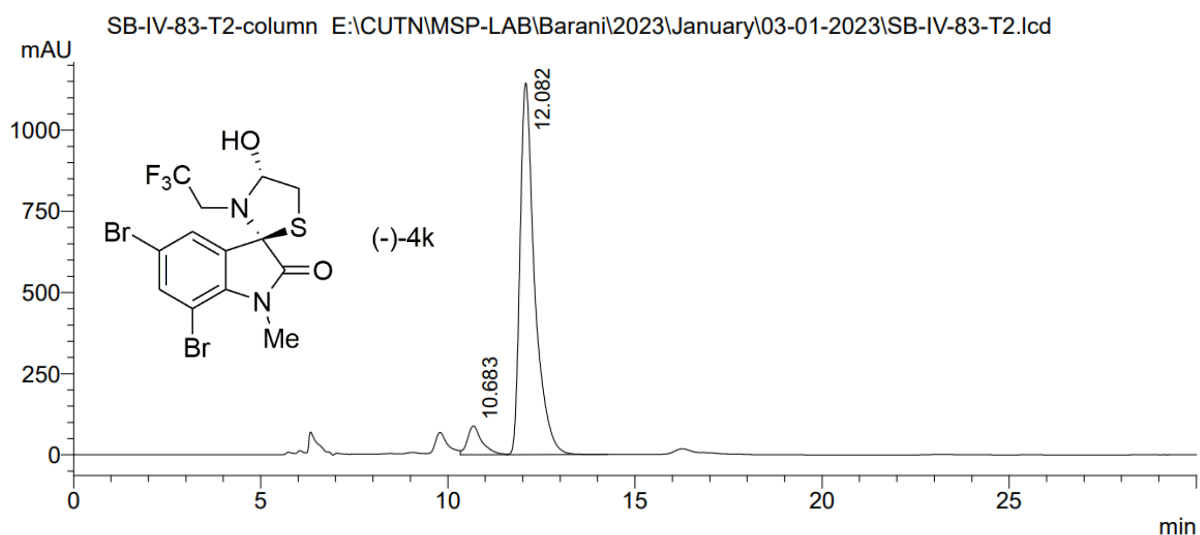

PDA Ch1 254nm

| Peak # | Ret. Time (min) | Area     | Height  | Area%   |
|--------|-----------------|----------|---------|---------|
| 1      | 10.683          | 2398244  | 88691   | 7.169   |
| 2      | 12.082          | 31052535 | 1144788 | 92.831  |
| Total  |                 | 33450779 | 1233479 | 100.000 |

### HPLC of racemic **4I**

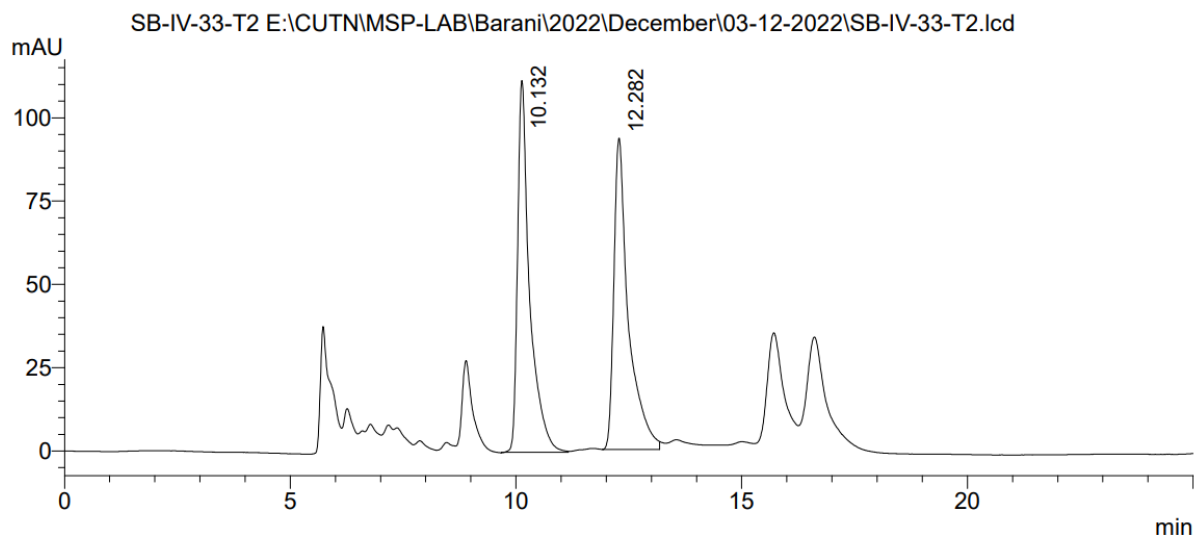

PDA Ch1 254nm

| Peak # | Ret. Time (min) | Area    | Height | Area%   |
|--------|-----------------|---------|--------|---------|
| 1      | 10.132          | 2071378 | 111540 | 49.751  |
| 2      | 12.282          | 2092076 | 93459  | 50.249  |
| Total  |                 | 4163454 | 204998 | 100.000 |

### HPLC of chiral **4I**: 74% ee

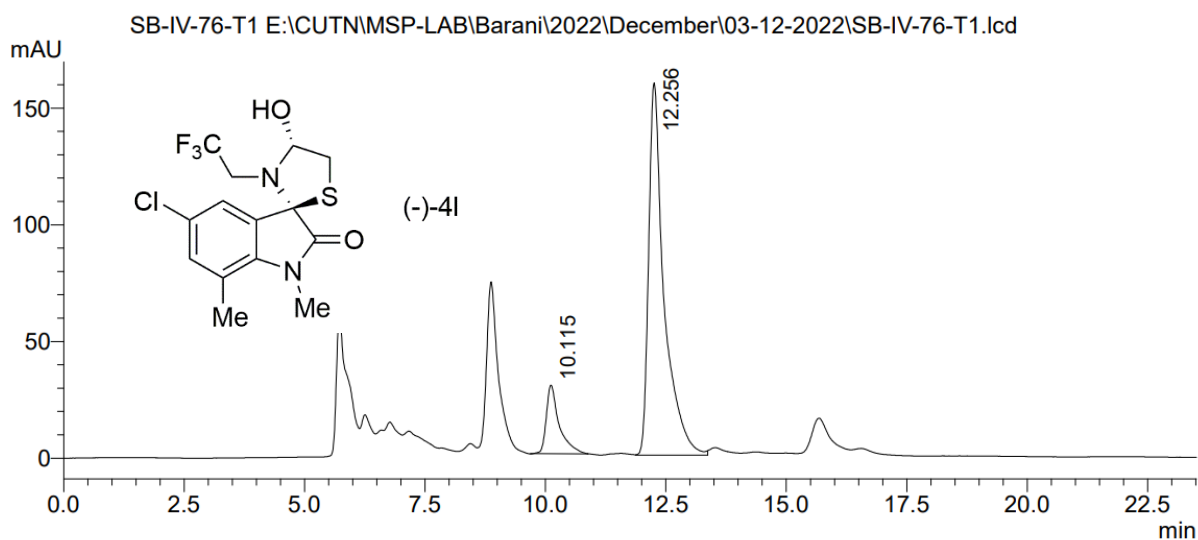

PDA Ch1 254nm

| Peak # | Ret. Time (min) | Area    | Height | Area%   |
|--------|-----------------|---------|--------|---------|
| 1      | 10.115          | 542019  | 29349  | 13.260  |
| 2      | 12.256          | 3545662 | 159458 | 86.740  |
| Total  |                 | 4087682 | 188808 | 100.000 |

### HPLC of racemic **4m**

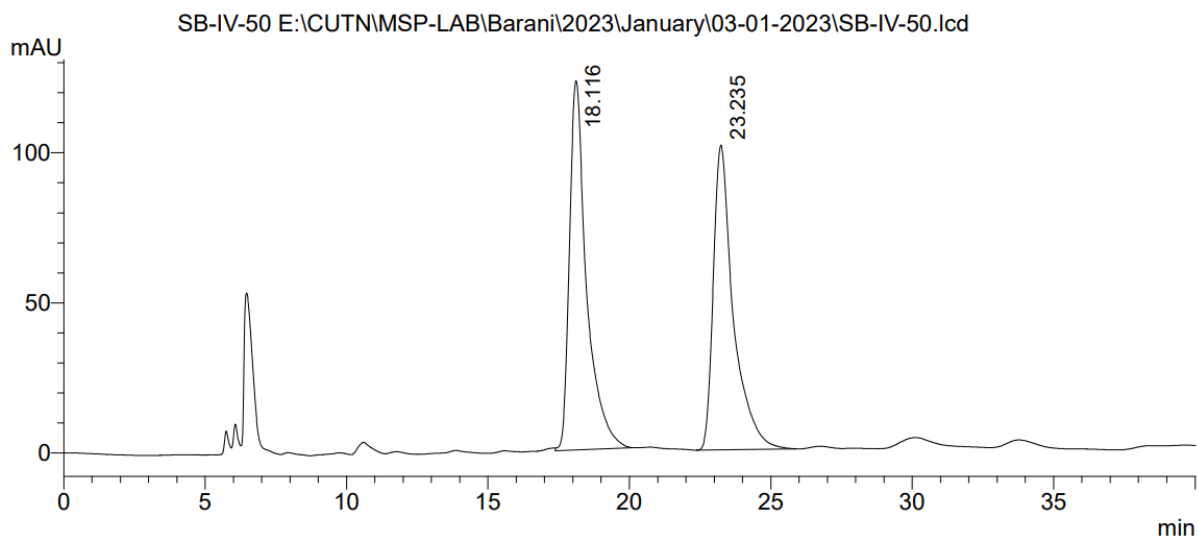

PDA Ch1 254nm

| Peak # | Ret. Time (min) | Area     | Height | Area%   |
|--------|-----------------|----------|--------|---------|
| 1      | 18.116          | 5162128  | 122972 | 50.814  |
| 2      | 23.235          | 4996753  | 101548 | 49.186  |
| Total  |                 | 10158881 | 224520 | 100.000 |

### HPLC of chiral **4m**: 89% *ee*

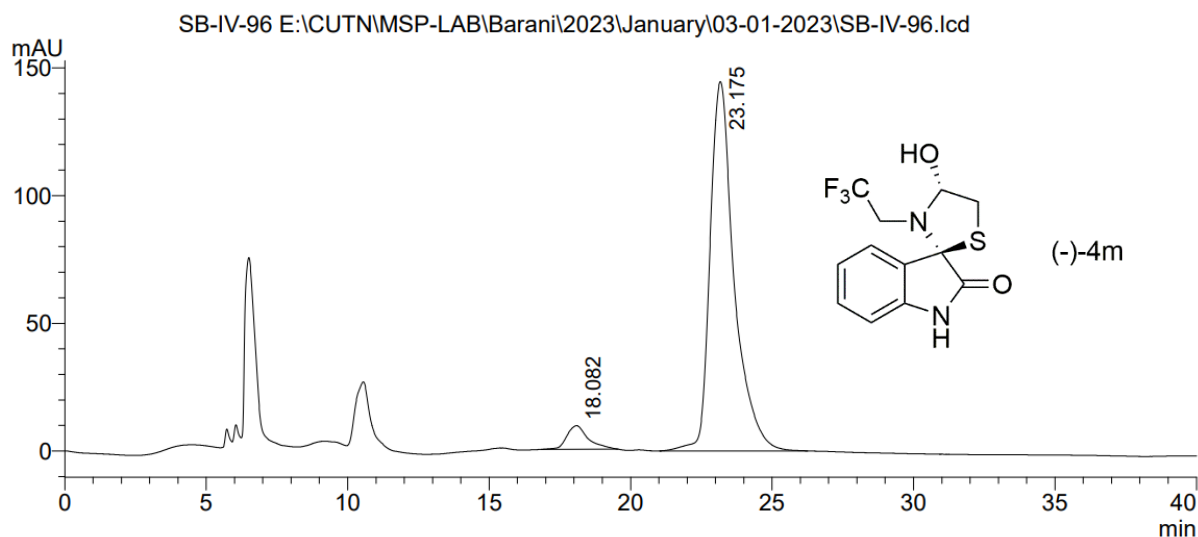

PDA Ch1 254nm

| Peak # | Ret. Time (min) | Area    | Height | Area%   |
|--------|-----------------|---------|--------|---------|
| 1      | 18.082          | 482762  | 9247   | 5.322   |
| 2      | 23.175          | 8587630 | 144606 | 94.678  |
| Total  |                 | 9070392 | 153853 | 100.000 |

## HPLC of racemic **4n**

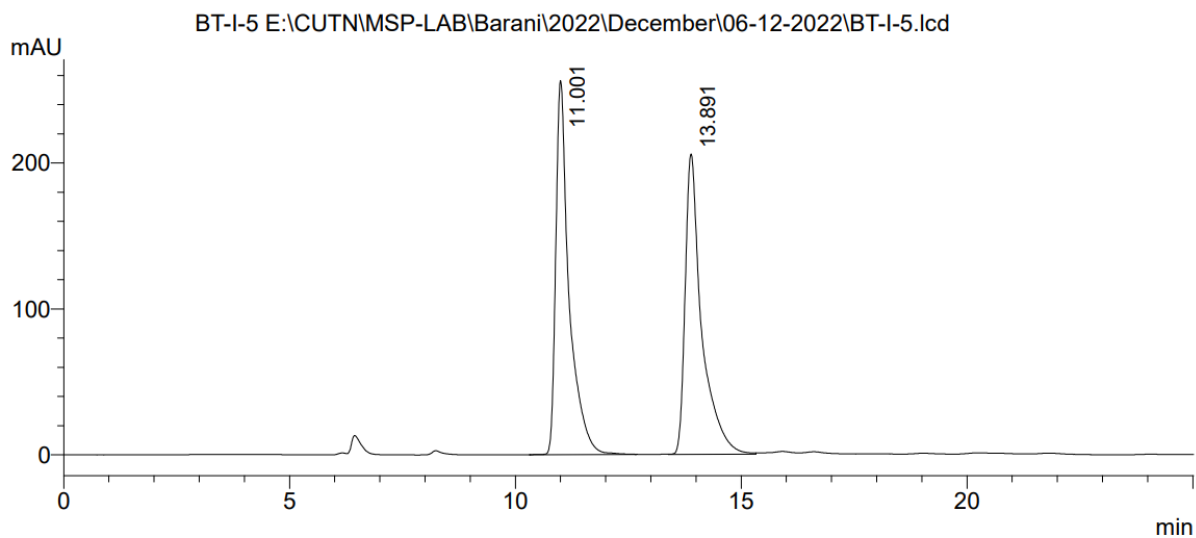

PDA Ch1 254nm

| Peak # | Ret. Time (min) | Area     | Height | Area%   |
|--------|-----------------|----------|--------|---------|
| 1      | 11.001          | 5244471  | 256313 | 50.087  |
| 2      | 13.891          | 5226192  | 205831 | 49.913  |
| Total  |                 | 10470663 | 462145 | 100.000 |

## HPLC of chiral **4n**: 89% *ee*

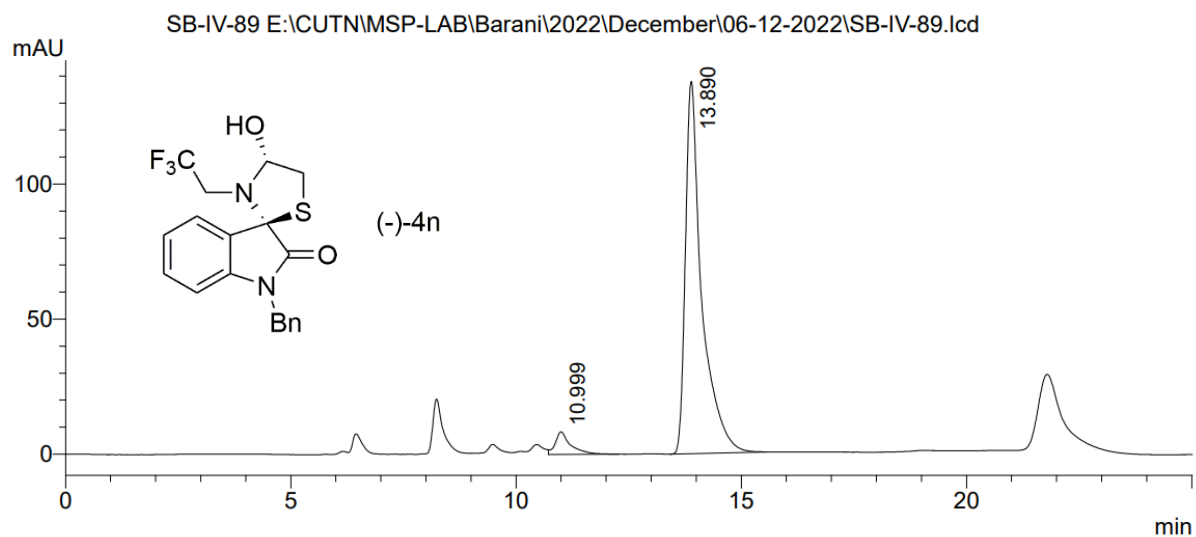

PDA Ch1 254nm

| Peak # | Ret. Time (min) | Area    | Height | Area%   |
|--------|-----------------|---------|--------|---------|
| 1      | 10.999          | 197459  | 8340   | 5.375   |
| 2      | 13.890          | 3476198 | 137811 | 94.625  |
| Total  |                 | 3673657 | 146151 | 100.000 |

### HPLC of racemic **4o**

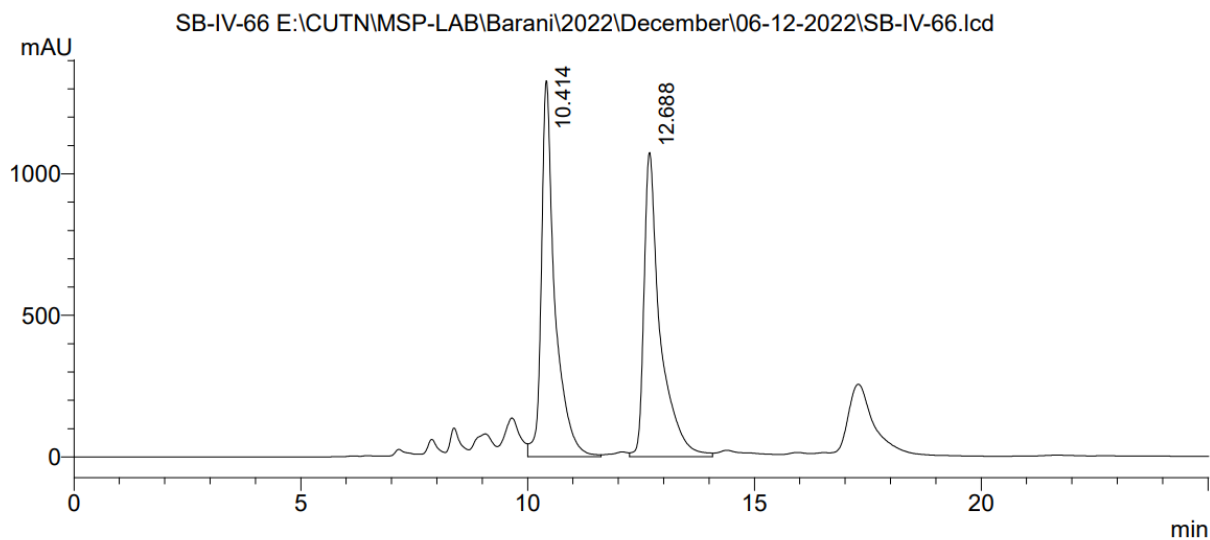

PDA Ch1 254nm

| Peak # | Ret. Time (min) | Area     | Height  | Area%   |
|--------|-----------------|----------|---------|---------|
| 1      | 10.414          | 27344400 | 1328265 | 50.576  |
| 2      | 12.688          | 26721936 | 1074288 | 49.424  |
| Total  |                 | 54066336 | 2402553 | 100.000 |

### HPLC of chiral **4o**: 89% ee

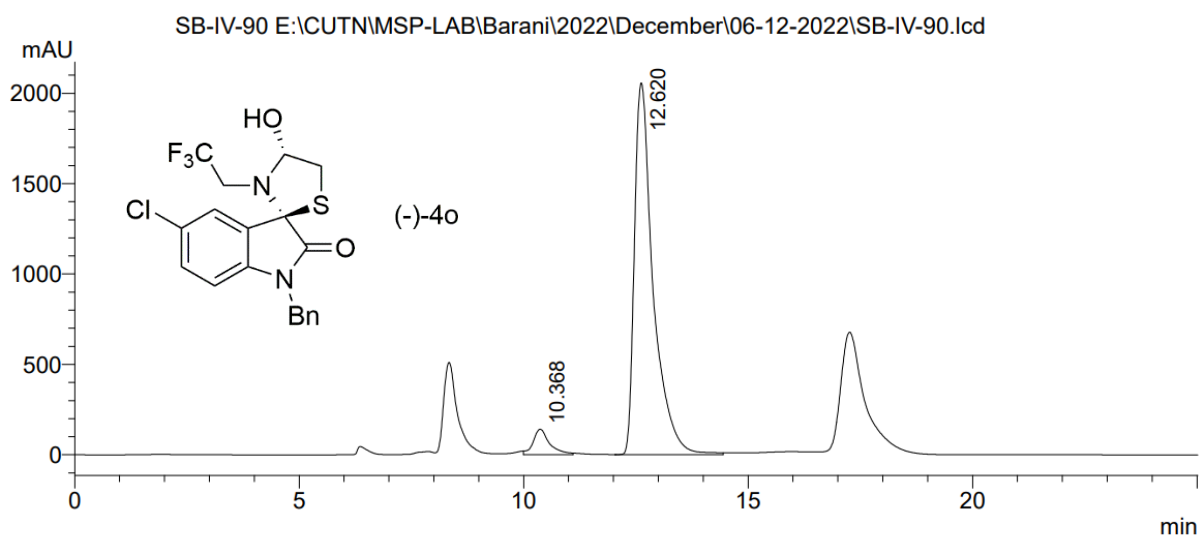

PDA Ch1 254nm

| Peak # | Ret. Time (min) | Area     | Height  | Area%   |
|--------|-----------------|----------|---------|---------|
| 1      | 10.368          | 3590735  | 140601  | 5.681   |
| 2      | 12.620          | 59616576 | 2056216 | 94.319  |
| Total  |                 | 63207311 | 2196817 | 100.000 |

### HPLC of racemic 4p

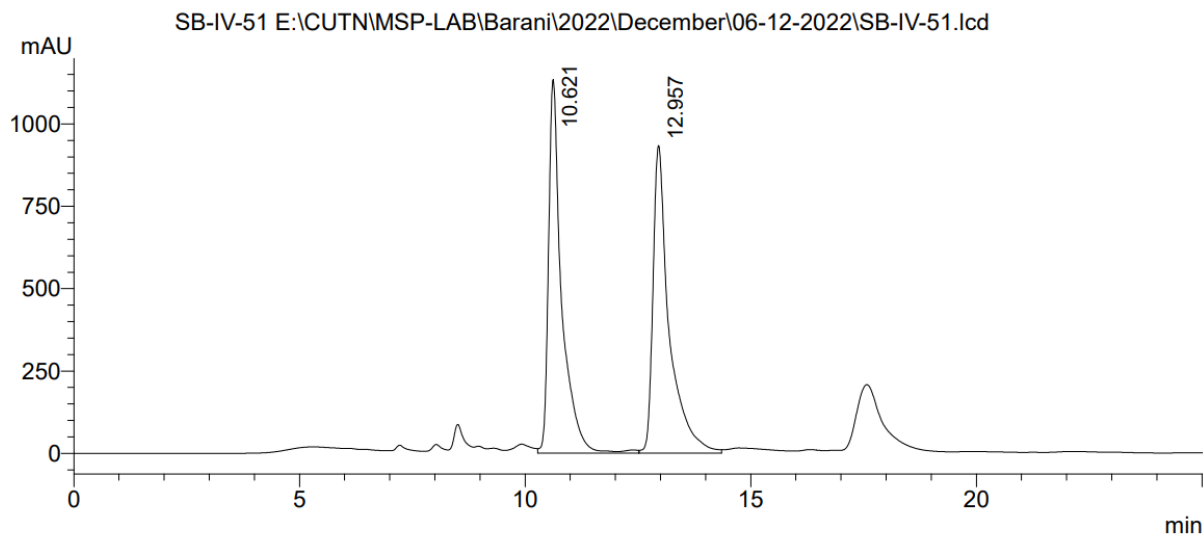

PDA Ch1 254nm

| Peak # | Ret. Time (min) | Area     | Height  | Area%   |
|--------|-----------------|----------|---------|---------|
| 1      | 10.621          | 23024597 | 1134329 | 49.729  |
| 2      | 12.957          | 23275715 | 934141  | 50.271  |
| Total  |                 | 46300313 | 2068470 | 100.000 |

### HPLC of chiral 4p: 85% ee

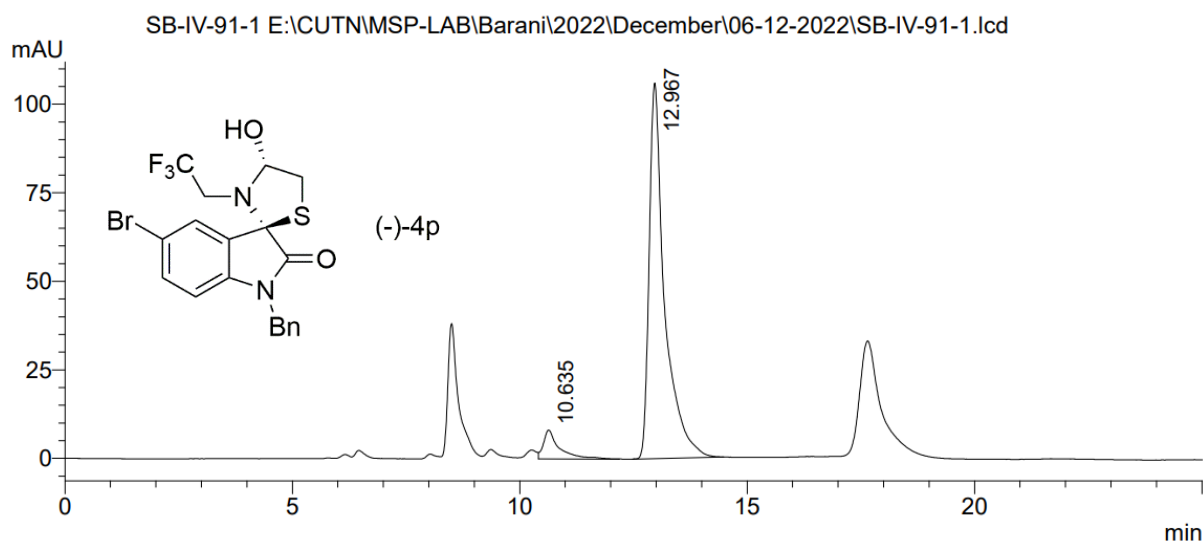

PDA Ch1 254nm

| Peak # | Ret. Time (min) | Area    | Height | Area%   |
|--------|-----------------|---------|--------|---------|
| 1      | 10.635          | 200205  | 8174   | 7.403   |
| 2      | 12.967          | 2504301 | 106016 | 92.597  |
| Total  |                 | 2704507 | 114190 | 100.000 |

### HPLC of racemic **4q**

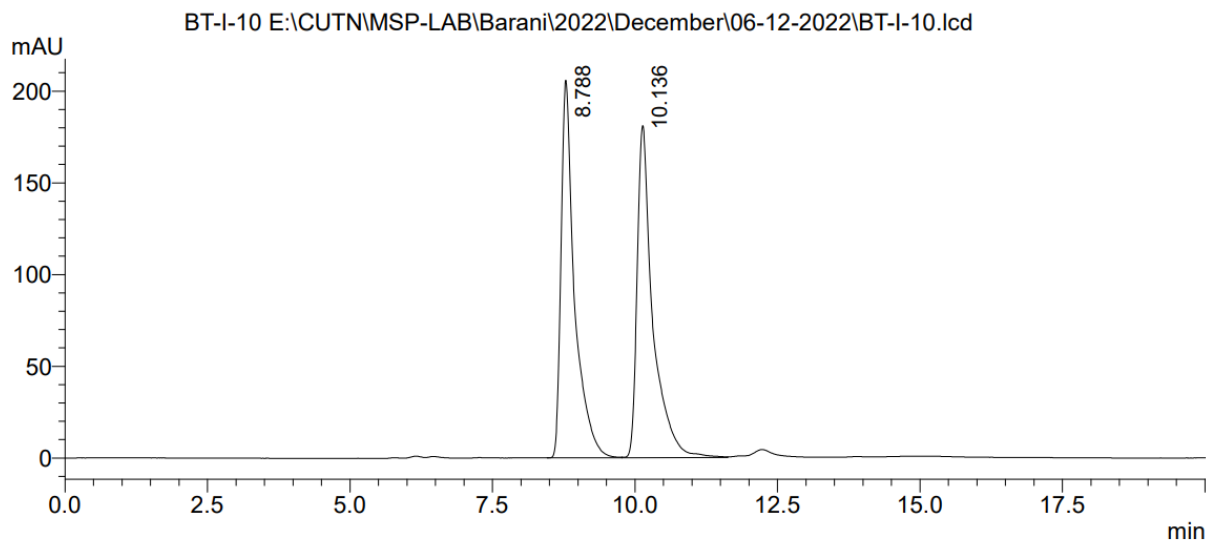

PDA Ch1 254nm

| Peak # | Ret. Time (min) | Area    | Height | Area%   |
|--------|-----------------|---------|--------|---------|
| 1      | 8.788           | 3390873 | 205829 | 49.519  |
| 2      | 10.136          | 3456807 | 181073 | 50.481  |
| Total  |                 | 6847680 | 386902 | 100.000 |

### HPLC of chiral **4q**: 89% *ee*

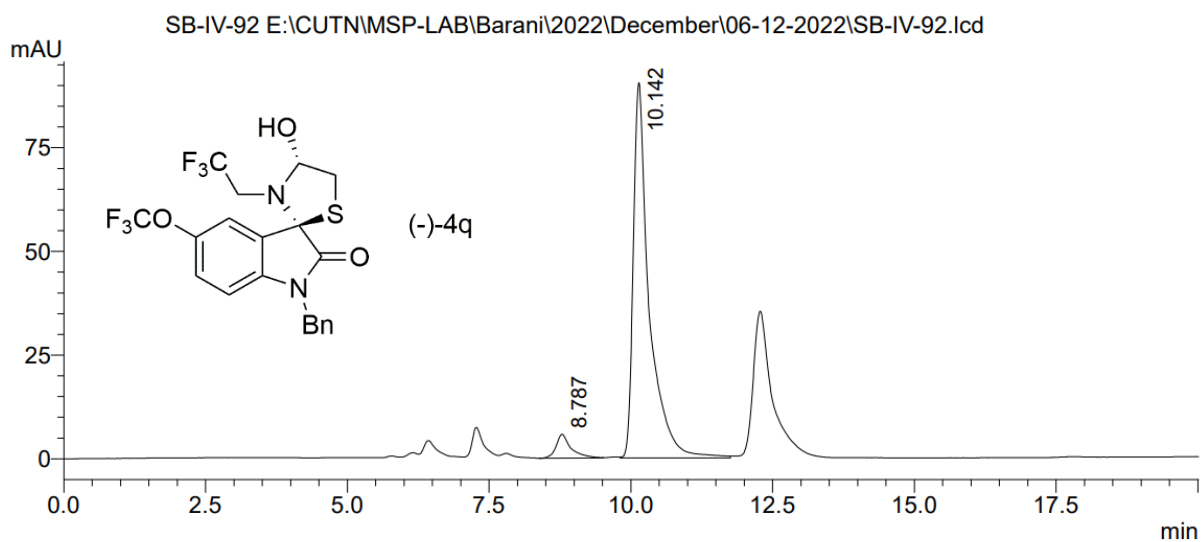

PDA Ch1 254nm

| Peak # | Ret. Time (min) | Area    | Height | Area%   |
|--------|-----------------|---------|--------|---------|
| 1      | 8.787           | 105723  | 5757   | 5.660   |
| 2      | 10.142          | 1762009 | 90475  | 94.340  |
| Total  |                 | 1867732 | 96233  | 100.000 |

### HPLC of racemic 4r

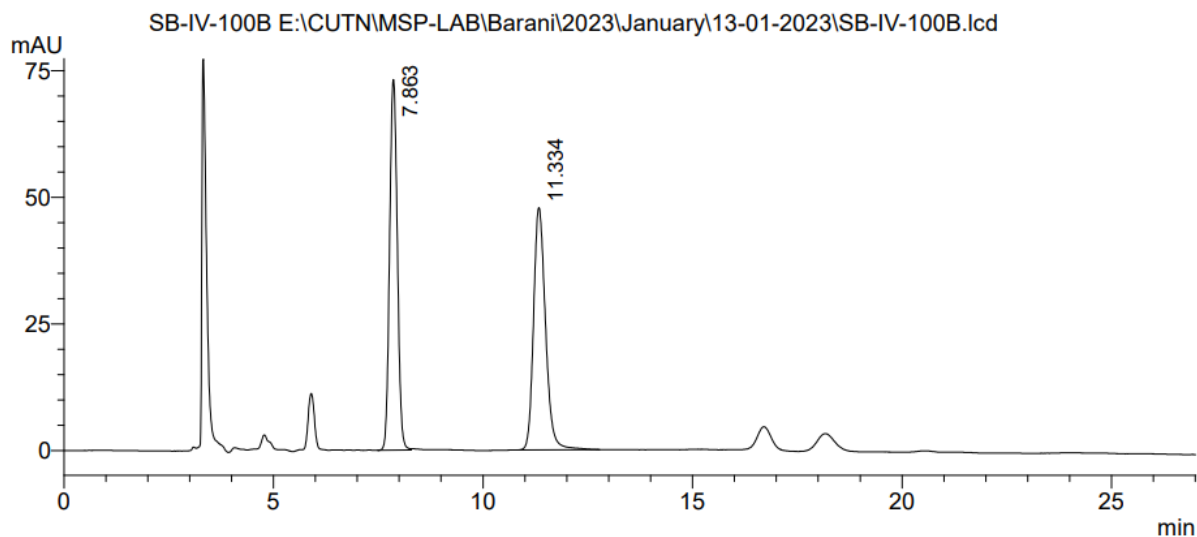

PDA Ch1 254nm

| Peak # | Ret. Time (min) | Area    | Height | Area%   |
|--------|-----------------|---------|--------|---------|
| 1      | 7.863           | 936950  | 73182  | 49.625  |
| 2      | 11.334          | 951109  | 47826  | 50.375  |
| Total  |                 | 1888060 | 121007 | 100.000 |

### HPLC of chiral 4r: 93% ee

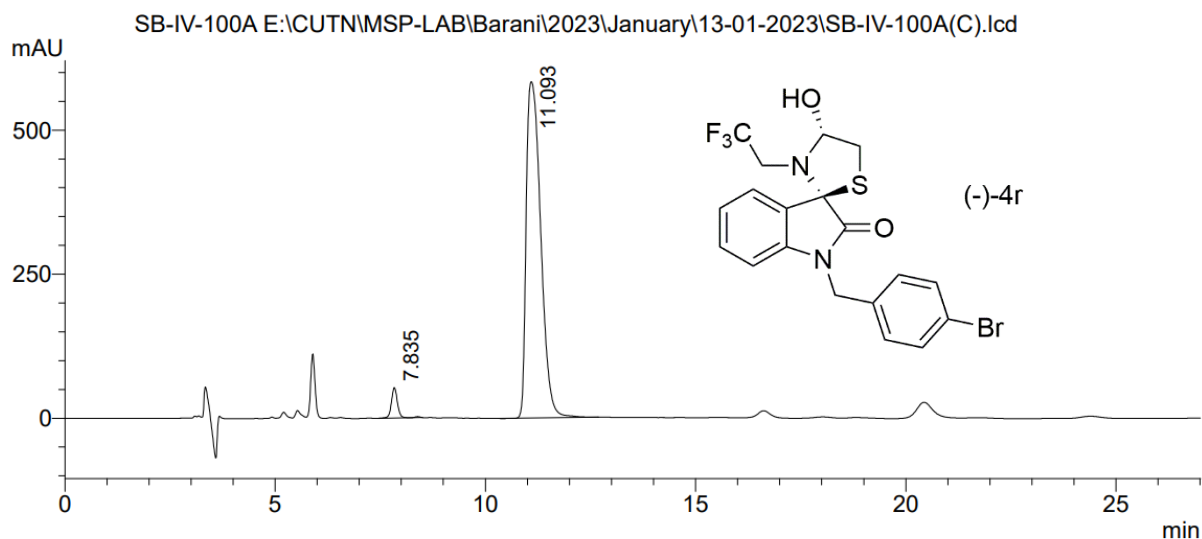

PDA Ch1 254nm

| Peak # | Ret. Time (min) | Area     | Height | Area%   |
|--------|-----------------|----------|--------|---------|
| 1      | 7.835           | 526221   | 52673  | 3.626   |
| 2      | 11.093          | 13985860 | 583786 | 96.374  |
| Total  |                 | 14512081 | 636459 | 100.000 |



### HPLC of racemic 4s

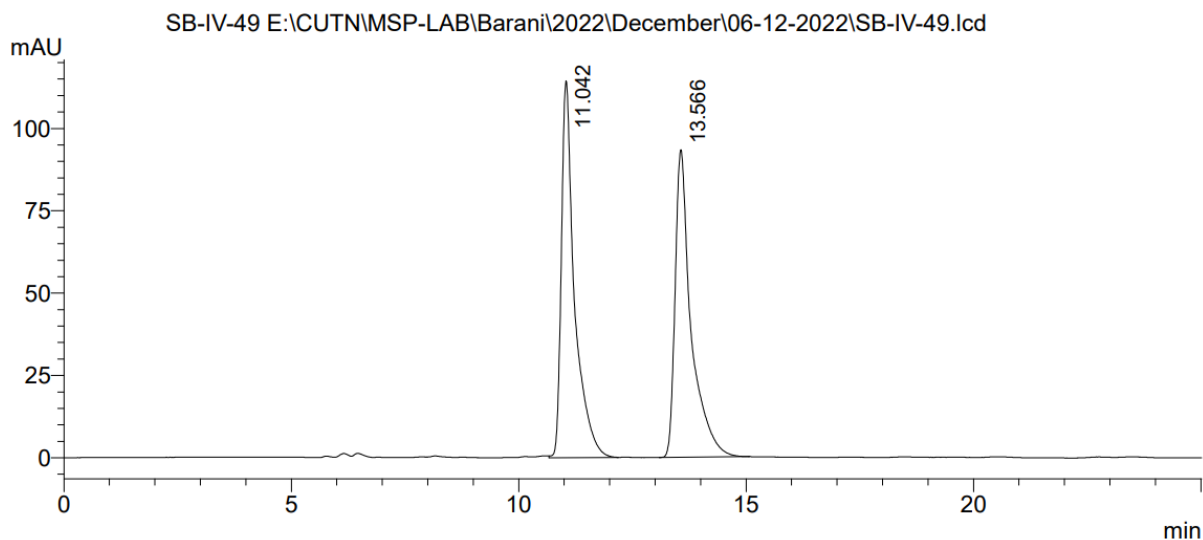

PDA Ch1 254nm

| Peak # | Ret. Time (min) | Area    | Height | Area%   |
|--------|-----------------|---------|--------|---------|
| 1      | 11.042          | 2291813 | 114389 | 50.182  |
| 2      | 13.566          | 2275177 | 93381  | 49.818  |
| Total  |                 | 4566990 | 207769 | 100.000 |

### HPLC of chiral 4s: 86% ee

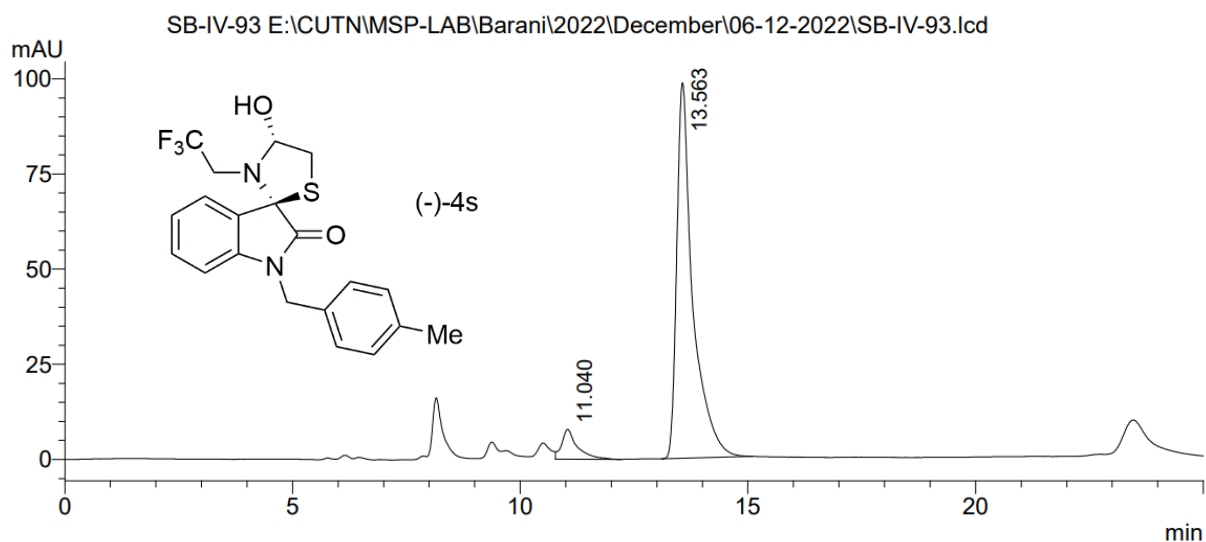

PDA Ch1 254nm

| Peak # | Ret. Time (min) | Area    | Height | Area%   |
|--------|-----------------|---------|--------|---------|
| 1      | 11.040          | 186393  | 7822   | 7.170   |
| 2      | 13.563          | 2413346 | 98593  | 92.830  |
| Total  |                 | 2599739 | 106415 | 100.000 |

### HPLC of racemic **4t**

SB-IV-52B E:\CUTNMSP-LAB\Barani\2023\January\04-01-2023\SB-IV-52B.lcd

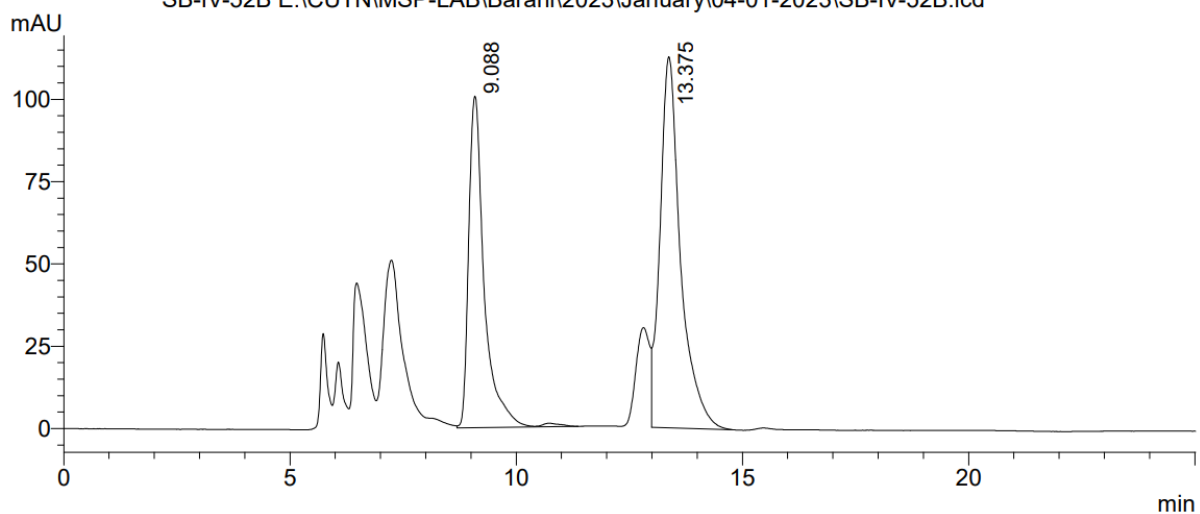

PDA Ch1 254nm

| Peak # | Ret. Time (min) | Area    | Height | Area%   |
|--------|-----------------|---------|--------|---------|
| 1      | 9.088           | 2411847 | 100682 | 40.437  |
| 2      | 13.375          | 3552588 | 112742 | 59.563  |
| Total  |                 | 5964435 | 213424 | 100.000 |

### HPLC of chiral **4t**: 59% ee

SB-IV-84B E:\CUTNMSP-LAB\Barani\2023\January\03-01-2023\SB-IV-84B.lcd

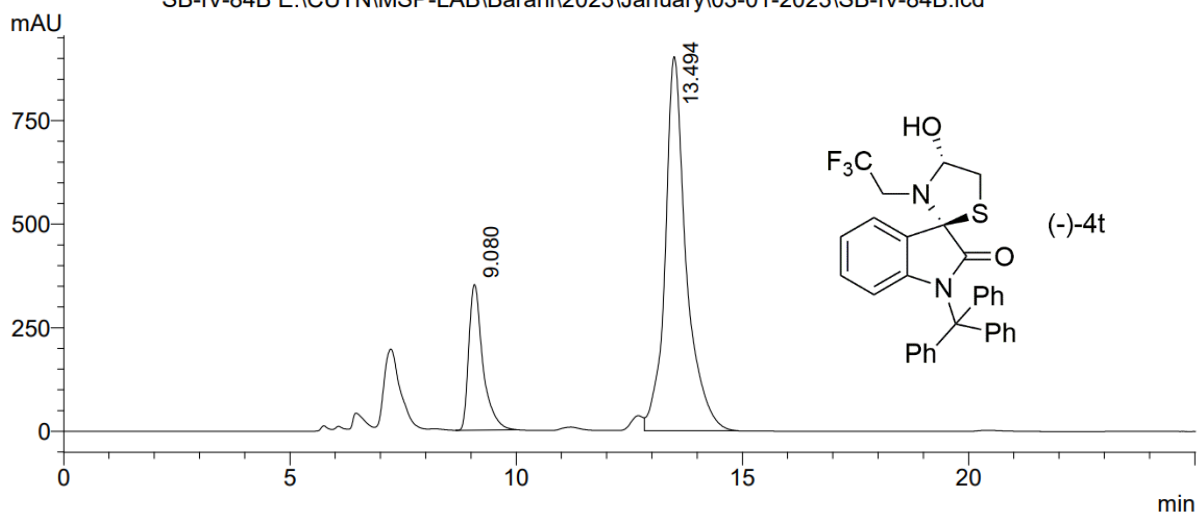

PDA Ch1 254nm

| Peak # | Ret. Time (min) | Area     | Height  | Area%   |
|--------|-----------------|----------|---------|---------|
| 1      | 9.080           | 7583206  | 351534  | 20.648  |
| 2      | 13.494          | 29142793 | 902921  | 79.352  |
| Total  |                 | 36725998 | 1254455 | 100.000 |

### HPLC of racemic **4u**

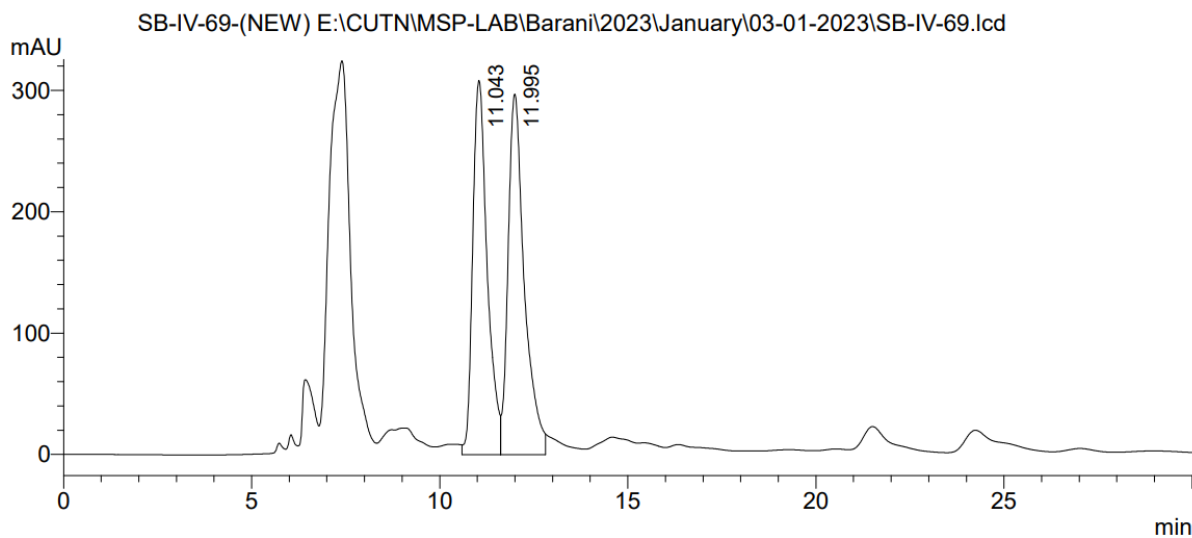

PDA Ch1 254nm

| Peak # | Ret. Time (min) | Area     | Height | Area%   |
|--------|-----------------|----------|--------|---------|
| 1      | 11.043          | 8297897  | 308492 | 48.104  |
| 2      | 11.995          | 8952011  | 297210 | 51.896  |
| Total  |                 | 17249908 | 605702 | 100.000 |

### HPLC of chiral **4u**: 63% *ee*

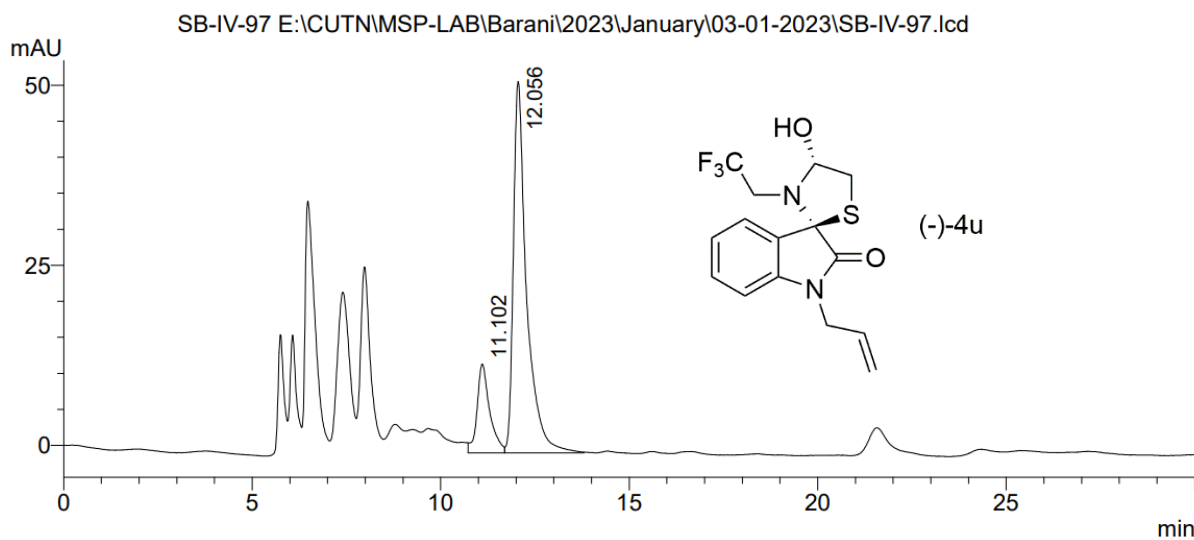

PDA Ch1 254nm

| Peak # | Ret. Time (min) | Area    | Height | Area%   |
|--------|-----------------|---------|--------|---------|
| 1      | 11.102          | 287275  | 12326  | 18.579  |
| 2      | 12.056          | 1258958 | 51524  | 81.421  |
| Total  |                 | 1546234 | 63850  | 100.000 |

### HPLC of racemic **4v**

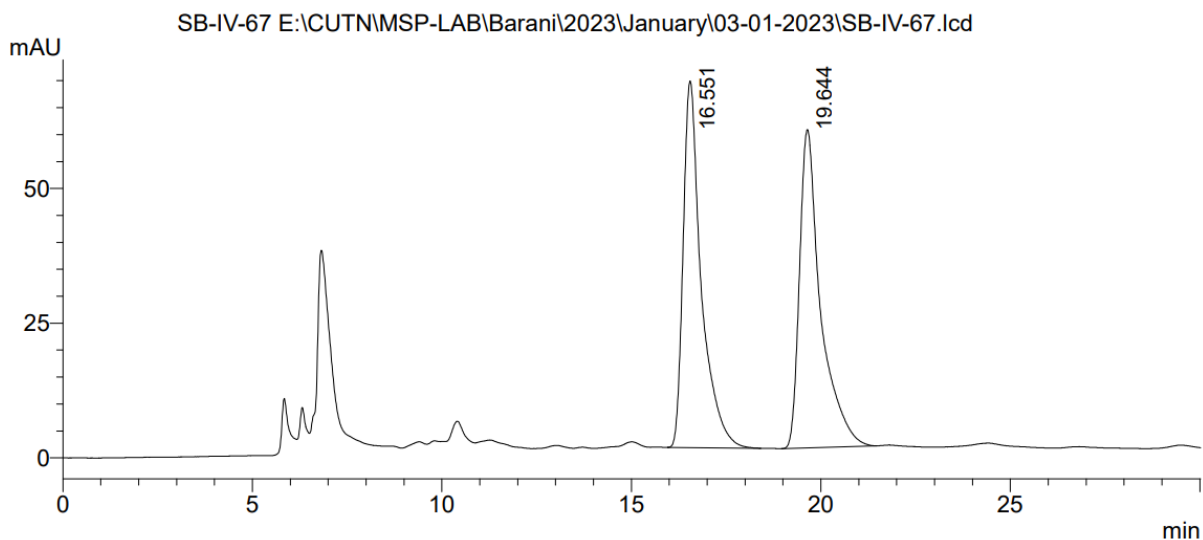

PDA Ch1 254nm

| Peak # | Ret. Time (min) | Area    | Height | Area%   |
|--------|-----------------|---------|--------|---------|
| 1      | 16.551          | 2263524 | 68068  | 49.687  |
| 2      | 19.644          | 2292007 | 59115  | 50.313  |
| Total  |                 | 4555531 | 127183 | 100.000 |

### HPLC of chiral **4v**: 89% ee

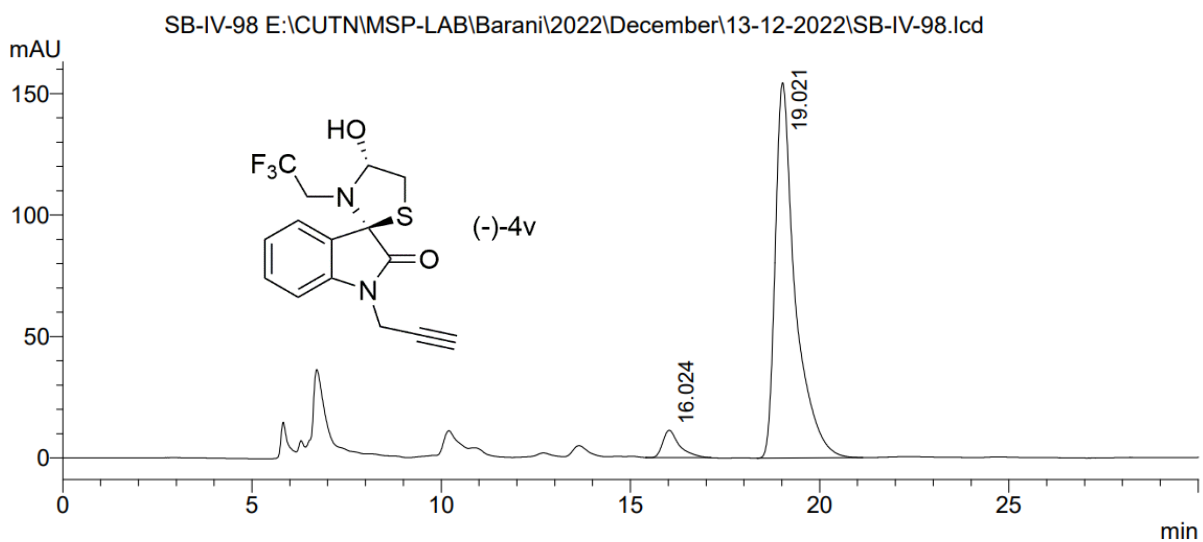

PDA Ch1 254nm

| Peak # | Ret. Time (min) | Area    | Height | Area%   |
|--------|-----------------|---------|--------|---------|
| 1      | 16.024          | 342075  | 11268  | 5.696   |
| 2      | 19.021          | 5663710 | 154489 | 94.304  |
| Total  |                 | 6005785 | 165757 | 100.000 |

### HPLC of racemic **4w**

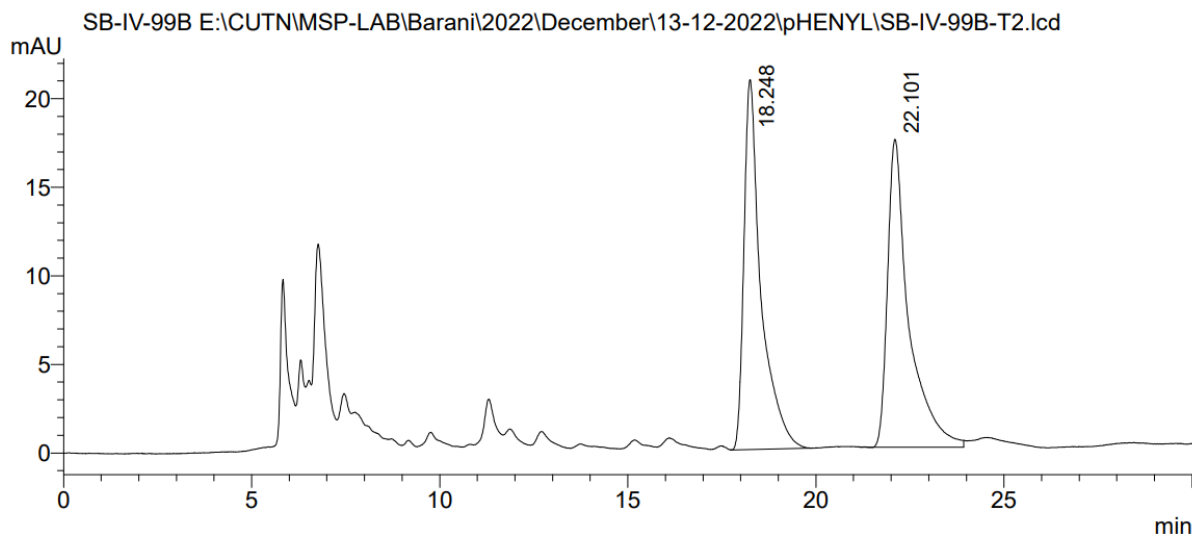

PDA Ch1 254nm

| Peak # | Ret. Time (min) | Area    | Height | Area%   |
|--------|-----------------|---------|--------|---------|
| 1      | 18.248          | 658551  | 20883  | 49.087  |
| 2      | 22.101          | 683041  | 17391  | 50.913  |
| Total  |                 | 1341593 | 38274  | 100.000 |

### HPLC of chiral **4w**: 93% ee

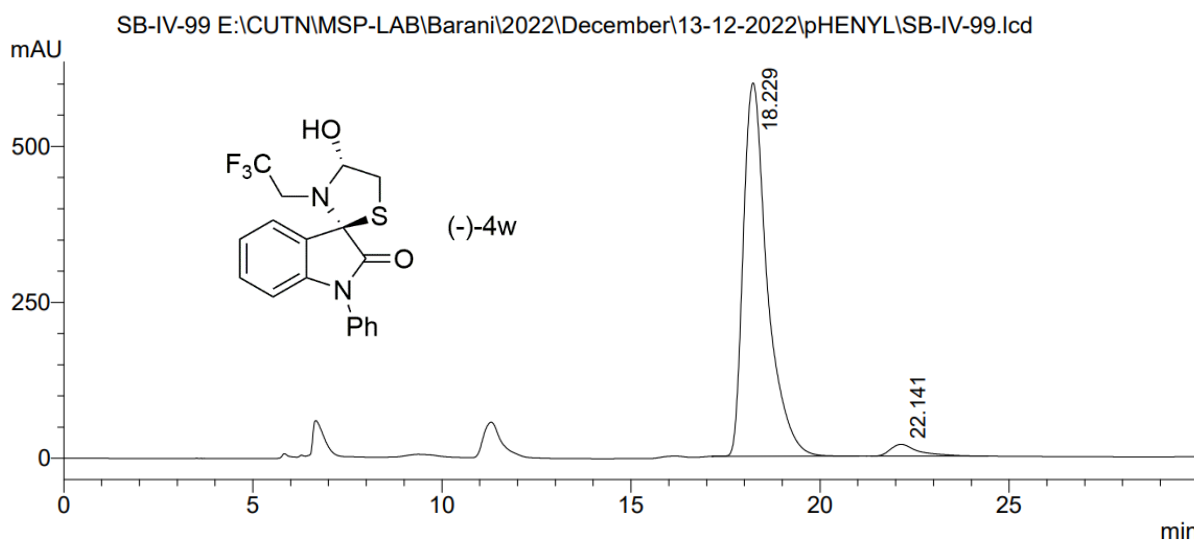

PDA Ch1 254nm

| Peak # | Ret. Time (min) | Area     | Height | Area%   |
|--------|-----------------|----------|--------|---------|
| 1      | 18.229          | 26313960 | 598604 | 96.362  |
| 2      | 22.141          | 993412   | 18971  | 3.638   |
| Total  |                 | 27307372 | 617574 | 100.000 |

### HPLC of racemic 5a

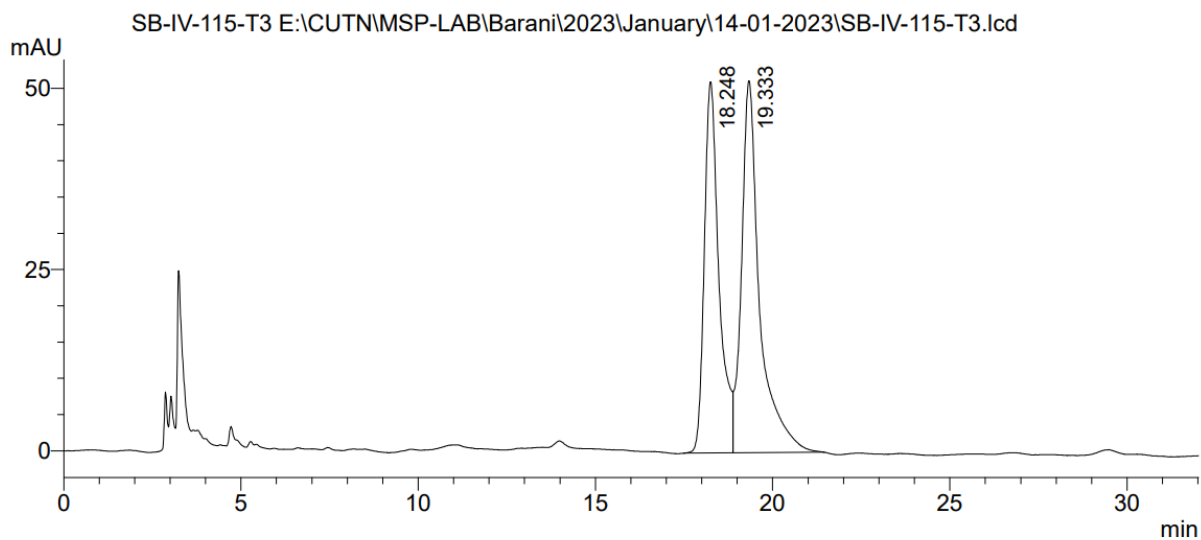

PDA Ch1 254nm

| Peak # | Ret. Time (min) | Area    | Height | Area%   |
|--------|-----------------|---------|--------|---------|
| 1      | 18.248          | 1477333 | 51205  | 44.821  |
| 2      | 19.333          | 1818766 | 51298  | 55.179  |
| Total  |                 | 3296099 | 102503 | 100.000 |

### HPLC of chiral 5a: 92% ee

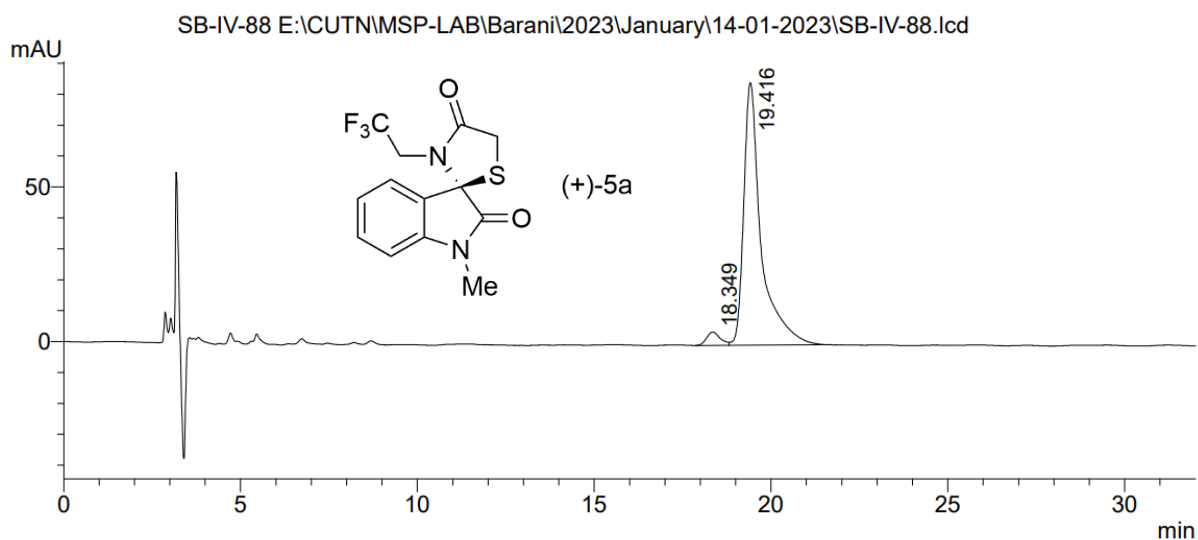

PDA Ch1 254nm

| Peak # | Ret. Time (min) | Area    | Height | Area%   |
|--------|-----------------|---------|--------|---------|
| 1      | 18.349          | 117209  | 4326   | 3.882   |
| 2      | 19.416          | 2901768 | 84894  | 96.118  |
| Total  |                 | 3018977 | 89220  | 100.000 |
